# Supplementary material for: Coalescent RNA-localizing and transcriptional activities of SAM68 modulate adhesion and subendothelial basement membrane assembly
Source: eLife journal article supplement (doi:10.7554/elife.85165), 2023-07-26
Supplement: fig1-data1 [file Figure 1_source data 1.xlsx]

## Sheet: cell morphology
Replicates are from biologically independent experiments
Replicate	Condition	Area	Perimeter	Circularity	Convexity	Max_feret_diam	Average_Thickness	Geodesic_Elong
1	CTRL	27815	708.995	0.695	0.87	227.178	82.652	1.576
1	CTRL	20241	616.831	0.669	0.889	242.596	69.355	2.063
1	CTRL	32855	1353.36	0.225	0.593	505.475	47.223	4.78
1	CTRL	16793	707.614	0.421	0.682	243.115	47.197	2.682
1	CTRL	32304	799.358	0.635	0.837	254.566	79.426	1.59
1	CTRL	29313	714.873	0.721	0.897	244.902	87.678	1.6
1	CTRL	28972	857.319	0.495	0.778	254.786	67.656	2.265
1	CTRL	23027	823.205	0.427	0.728	298.05	53.625	3.998
1	CTRL	11512	546.556	0.484	0.777	188.597	39.616	2.656
1	CTRL	38389	967.294	0.516	0.864	341.646	74.021	2.587
1	CTRL	59564	1243.35	0.484	0.887	493.463	84.333	3.596
1	CTRL	35499	890.624	0.562	0.848	261.123	80.013	1.635
1	CTRL	25430	1134.35	0.248	0.476	339.265	42.138	4.004
1	CTRL	25291	1119.51	0.254	0.635	355.614	43.047	4.059
1	CTRL	31665	847.418	0.554	0.85	327.024	78.436	2.771
1	CTRL	31046	1123.24	0.309	0.658	434.337	49.629	5.253
1	CTRL	26669	771.241	0.563	0.868	254.772	63.512	2.054
1	CTRL	29170	723.378	0.701	0.898	224.964	78.083	1.423
1	CTRL	27760	901.676	0.429	0.791	349.777	55.803	3.672
1	CTRL	42428	964.478	0.573	0.877	307.358	88.339	1.692
1	CTRL	18802	698.554	0.484	0.743	214.611	51.36	1.916
1	CTRL	25950	774.248	0.544	0.824	275.016	66.012	1.999
1	CTRL	21765	817.612	0.409	0.685	242.695	50.511	2.215
1	CTRL	15092	590.055	0.545	0.773	216.002	49.441	2.919
1	CTRL	22613	711.351	0.562	0.866	284.886	63.946	3.019
1	CTRL	20632	577.029	0.779	0.952	219.92	83.935	1.91
1	CTRL	28799	825.102	0.532	0.844	282.124	63.968	2.269
1	CTRL	37491	1184.36	0.336	0.724	457.473	60.285	4.765
1	CTRL	36096	1222.15	0.304	0.705	507.119	55.837	5.281
1	CTRL	29008	1010.1	0.357	0.783	426.395	56.562	4.665
1	CTRL	31557	774.708	0.661	0.881	268.931	97.898	1.68
1	CTRL	30515	836.288	0.548	0.812	316.967	73.476	2.685
1	CTRL	25349	917.17	0.379	0.688	277.146	55.566	2.583
1	CTRL	25477	1049.56	0.291	0.706	432.945	46.755	4.492
1	CTRL	29635	952.585	0.41	0.851	274.875	52.273	1.885
1	CTRL	36953	949.943	0.515	0.796	345.313	79.552	2.722
1	CTRL	33950	967.889	0.455	0.833	343.657	59.892	2.738
1	CTRL	27549	1022.53	0.331	0.708	308.872	47.567	3.225
1	CTRL	39429	929.253	0.574	0.905	372.465	89.247	2.596
1	CTRL	31045	915.583	0.465	0.772	287.211	64.727	2.038
1	CTRL	48193	989.492	0.619	0.914	354.295	98.087	2.054
1	CTRL	21662	715.373	0.532	0.775	244.322	60.754	2.116
1	CTRL	60571	1192.44	0.535	0.81	354.746	103.865	1.713
1	CTRL	34214	799.437	0.673	0.907	262.011	86.451	1.624
1	siSAM68_	31601	1253.79	0.253	0.594	384.667	47.825	2.747
1	siSAM68_	9695	852.186	0.168	0.402	306.4	21.276	5.904
1	siSAM68_	17704	629.374	0.562	0.884	245.693	58.301	2.782
1	siSAM68_	43538	1182.12	0.392	0.767	333.588	66.728	1.793
1	siSAM68_	15303	669.137	0.429	0.756	208.319	44.385	2.421
1	siSAM68_	345	96.456	0.466	0.737	39.962	6.158	2.844
1	siSAM68_	14623	659.14	0.423	0.725	236.381	45.912	2.195
1	siSAM68_	22342	960.019	0.305	0.589	313.129	46.252	3.625
1	siSAM68_	20437	1108.91	0.209	0.511	357.239	34.847	3.796
1	siSAM68_	19651	1095.05	0.206	0.471	300.375	33.048	4.617
1	siSAM68_	33846	1072.83	0.37	0.74	334.701	65.807	2.509
1	siSAM68_	20618	970.475	0.275	0.622	324.82	37.967	4.144
1	siSAM68_	20419	914.774	0.307	0.608	265.731	43.625	3.345
1	siSAM68_	25662	1109.24	0.262	0.61	378.737	46.371	2.834
1	siSAM68_	31605	1580.96	0.159	0.53	568.96	35.632	8.26
1	siSAM68_	33811	2156.32	0.091	0.338	636.548	29.733	7.77
1	siSAM68_	34338	852.893	0.593	0.851	274.985	70.292	1.903
1	siSAM68_	21776	770.36	0.461	0.703	254.448	55.406	2.791
1	siSAM68_	21788	675.341	0.6	0.895	255.392	66.531	2.333
1	siSAM68_	22835	813.551	0.434	0.856	307.065	47.085	2.829
1	siSAM68_	12747	565.096	0.502	0.814	194.126	43.195	2.205
1	siSAM68_	24028	886.967	0.384	0.67	315.279	50.396	3.257
1	siSAM68_	23224	774.153	0.487	0.775	259.139	58.008	2.304
1	siSAM68_	28939	1093.8	0.304	0.587	368.246	52.426	3.704
1	siSAM68_	21858	1211.9	0.187	0.527	350.617	34.368	4.243
1	siSAM68_	22912	1321.94	0.165	0.426	367.241	33.517	3.685
1	siSAM68_	34690	1200.08	0.303	0.582	404.784	57.877	3.598
1	siSAM68_	30231	907.555	0.461	0.794	340.278	59.603	3.276
1	siSAM68_	18932	940.67	0.269	0.629	321.708	37.235	4.003
1	siSAM68_	15112	1207.51	0.13	0.395	399.025	22.997	7.567
1	siSAM68_	44048	1115.5	0.445	0.772	416.779	74.511	2.97
1	siSAM68_	23354	1241.44	0.19	0.45	485.891	35.981	5.709
1	siSAM68_	51953	1248.67	0.419	0.767	462.93	75.531	3.056
1	siSAM68_	23140	1012	0.284	0.542	334.691	42.175	4.215
1	siSAM68_	35834	903.381	0.552	0.876	321.076	71.477	2.452
1	siSAM68_	27018	937.686	0.386	0.744	314.759	53.388	3.006
1	siSAM68_	21335	1090.99	0.225	0.531	312.493	37.109	3.881
1	siSAM68_	22404	1208.01	0.193	0.435	335.261	35.17	5.303
1	siSAM68_	32479	1186.01	0.29	0.693	403.866	48.111	3.698
1	siSAM68_	34921	1143.44	0.336	0.66	431.237	61.299	3.007
1	siSAM68_	12712	755.747	0.28	0.531	276.067	32.76	4.24
1	siSAM68_	19961	1054.29	0.226	0.556	414.638	36.599	4.991
1	siSAM68_	20099	1193.86	0.177	0.436	403.976	33.629	4.204
1	siSAM68_	32209	1094.82	0.338	0.7	350.179	55.223	3.402
1	siSAM68_	14445	727.4	0.343	0.61	241.015	37.783	3.029
1	siSAM68_	18181	664.004	0.518	0.828	211.367	50.796	2.236
1	siSAM68_	18691	1023.8	0.224	0.584	386.264	34.155	5.497
1	siSAM68_	9587	544.985	0.406	0.686	205.456	35.144	3.172
1	siSAM68_	20534	1159.79	0.192	0.561	439.323	33.567	6.679
1	siSAM68_	18213	732.763	0.426	0.76	276.827	46.02	3.738
1	siSAM68_	22256	967.603	0.299	0.585	313.806	44.074	3.634
1	siSAM68_	15508	666.59	0.439	0.759	208.319	45.776	2.263
1	siSAM68_	12739	693.635	0.333	0.649	296.184	36.609	4.095
1	siSAM68_	9809	858.239	0.167	0.375	273.234	21.45	4.865
2	CTRL	19535	662.837	0.559	0.809	209.614	56.05	2.138
2	CTRL	16848	641.536	0.514	0.778	222.122	52.842	2.206
2	CTRL	23128	629.2	0.734	0.893	214.401	82.431	1.674
2	CTRL	22320	557.624	0.902	0.962	186.462	118.636	1.285
2	CTRL	17503	514.647	0.83	0.933	171.712	76.411	1.381
2	CTRL	30124	681.433	0.815	0.933	236.502	103.657	1.591
2	CTRL	16712	525.294	0.761	0.928	185.744	74.684	1.711
2	CTRL	24911	682.639	0.672	0.87	244.008	72.692	2.005
2	CTRL	36403	762.3	0.787	0.943	285.955	116.403	1.905
2	CTRL	20894	648.779	0.624	0.842	225.258	64.42	1.936
2	CTRL	37063	842.032	0.657	0.915	332.295	96.022	2.286
2	CTRL	11592	476.876	0.641	0.839	177.496	50.626	2.102
2	CTRL	18383	577.87	0.692	0.876	213.86	68.913	1.865
2	CTRL	17572	642.837	0.534	0.816	233.489	54.418	2.235
2	CTRL	21362	597.005	0.753	0.938	201.646	75.412	1.629
2	CTRL	17394	500.684	0.872	0.956	175.514	87.917	1.483
2	CTRL	23560	665.574	0.668	0.894	242.662	68.137	1.95
2	CTRL	31236	767.028	0.667	0.891	258.815	76.792	1.808
2	CTRL	16715	536.29	0.73	0.892	178.017	64.508	1.509
2	CTRL	8880	364.141	0.842	0.949	135.871	54.592	1.617
2	CTRL	29732	787.735	0.602	0.872	282.363	71.294	2.057
2	CTRL	23397	781.182	0.482	0.8	313.882	61.218	2.752
2	CTRL	23779	627.629	0.759	0.933	225.743	90.248	1.795
2	CTRL	33448	810.488	0.64	0.865	296.724	89.916	1.92
2	CTRL	33018	734.66	0.769	0.914	249.177	94.425	1.532
2	CTRL	12619	519.971	0.587	0.818	185.586	49.847	2.428
2	CTRL	15003	508.173	0.73	0.894	165.529	64.059	1.504
2	CTRL	25592	630.81	0.808	0.939	222.551	100.173	1.39
2	CTRL	17098	564.866	0.673	0.888	177.539	62.671	1.502
2	CTRL	18522	602.463	0.641	0.889	211.814	59.155	1.979
2	CTRL	39472	1059.92	0.442	0.758	361.216	69.064	2.696
2	CTRL	18467	649.755	0.55	0.793	253.527	61.514	2.625
2	CTRL	13719	527.214	0.62	0.913	219.329	49.178	2.381
2	CTRL	31659	971.546	0.421	0.782	296.233	63.198	1.851
2	CTRL	27635	833.376	0.5	0.801	288.141	63.533	2.25
2	CTRL	21947	632.246	0.69	0.915	211.206	74.722	1.506
2	CTRL	24956	795.01	0.496	0.783	248.204	60.769	1.866
2	CTRL	11943	459.716	0.71	0.902	146.322	50.671	1.494
2	CTRL	16285	538.607	0.705	0.895	188.513	64.033	1.898
2	CTRL	39932	923.319	0.589	0.853	304.237	81.922	1.791
2	CTRL	29541	868.022	0.493	0.813	304.665	59.267	2.572
2	CTRL	22511	812.289	0.429	0.789	243.167	48.205	2.095
2	CTRL	24007	774.439	0.503	0.82	263.532	59.189	2.278
2	CTRL	17551	612.769	0.587	0.85	195.862	58.735	1.798
2	CTRL	28322	787.005	0.575	0.881	272.655	69.06	2.312
2	CTRL	26447	772.526	0.557	0.833	264.121	66.18	1.859
2	CTRL	14364	488.943	0.755	0.927	185.324	64.909	1.748
2	CTRL	22054	745.537	0.499	0.798	293.343	64.701	3.472
2	CTRL	23093	739.809	0.53	0.806	256.135	65.012	2.373
2	CTRL	22459	785.704	0.457	0.707	263.372	55.03	2.696
2	CTRL	32974	809.624	0.632	0.859	289.353	79.07	2.036
2	siSAM68_	17211	667.28	0.486	0.805	223.036	49.413	2.165
2	siSAM68_	20385	1022.13	0.245	0.56	360.701	36.996	3.963
2	siSAM68_	41967	1169.82	0.385	0.735	455.495	65.339	3.556
2	siSAM68_	18423	1250.32	0.148	0.451	530.961	27.762	8.7
2	siSAM68_	22524	799.588	0.443	0.754	293.002	51.55	3.108
2	siSAM68_	9107	756.723	0.2	0.479	210.021	22.585	4.661
2	siSAM68_	9555	684.115	0.257	0.556	190.686	26.695	3.72
2	siSAM68_	28334	1109.89	0.289	0.576	370.552	50.425	3.879
2	siSAM68_	23493	1071.83	0.257	0.663	279.861	37.915	3.207
2	siSAM68_	20308	816.787	0.383	0.694	289.85	48.583	3.079
2	siSAM68_	24846	983.018	0.323	0.67	300.093	45.674	3.187
2	siSAM68_	20233	963.771	0.274	0.536	304.002	40.968	3.223
2	siSAM68_	59487	1664.33	0.27	0.531	537.13	69.106	4.727
2	siSAM68_	25581	907.594	0.39	0.776	347.196	52.872	2.803
2	siSAM68_	11184	580.17	0.418	0.715	210.319	36.987	2.972
2	siSAM68_	14925	767.045	0.319	0.586	240.01	41.345	2.805
2	siSAM68_	11501	734.778	0.268	0.578	292.857	28.216	6.088
2	siSAM68_	18890	907.69	0.288	0.58	270.352	41.974	2.653
2	siSAM68_	20703	977.544	0.272	0.59	299.681	40.572	3.174
2	siSAM68_	22108	1031.99	0.261	0.525	344.478	38.233	5.168
2	siSAM68_	19626	826.538	0.361	0.628	235.907	48.473	2.133
2	siSAM68_	21773	1016.4	0.265	0.557	261.905	38.613	3.461
2	siSAM68_	16332	877.598	0.266	0.695	388.712	34.139	5.634
2	siSAM68_	11536	635.006	0.36	0.696	246.13	38.424	3.154
2	siSAM68_	17995	685.702	0.481	0.761	228.123	53.059	2.35
2	siSAM68_	22278	865.65	0.374	0.727	253.811	47.954	2.433
2	siSAM68_	12196	755.898	0.268	0.595	264.093	29.797	4.403
2	siSAM68_	16837	1354.54	0.115	0.275	529.102	23.053	8.688
2	siSAM68_	12387	556.076	0.503	0.729	204.482	45.935	3.063
2	siSAM68_	11717	558.948	0.471	0.783	159.524	41.812	1.839
2	siSAM68_	30784	1419.64	0.192	0.463	399.741	40.017	4.549
2	siSAM68_	26499	1355.49	0.181	0.561	358.169	35.636	4.417
2	siSAM68_	18694	695.032	0.486	0.791	245.978	48.33	2.898
2	siSAM68_	16261	689.248	0.43	0.725	263.219	47.02	3.105
2	siSAM68_	13811	769.154	0.293	0.598	258.118	35.153	3.743
2	siSAM68_	33005	903.477	0.508	0.812	267.711	67.357	1.915
2	siSAM68_	11649	654.944	0.341	0.627	188.788	35.14	3.149
2	siSAM68_	26333	902.708	0.406	0.677	305.236	54.382	2.43
2	siSAM68_	15131	680.553	0.411	0.663	208.062	43.199	2.356
2	siSAM68_	19035	867.506	0.318	0.569	263.03	43.889	3.344
2	siSAM68_	14653	829.932	0.267	0.496	292.698	37.319	3.111
2	siSAM68_	17106	912.307	0.258	0.583	353.638	34.072	5.874
2	siSAM68_	18543	794.954	0.369	0.627	267.479	45.896	2.784
2	siSAM68_	20644	1039.71	0.24	0.587	339.591	38.023	3.577
2	siSAM68_	32397	1229.85	0.269	0.535	414.155	53.38	3.498
2	siSAM68_	13708	759.421	0.299	0.608	299.697	34.404	5.097
2	siSAM68_	11086	641.957	0.338	0.632	254.012	33.698	4.317
2	siSAM68_	16301	611.984	0.547	0.794	202.2	53.386	2.34
3	CTRL	36717	943.374	0.518	0.797	316.891	75.766	2.328
3	CTRL	38860	887.943	0.619	0.828	301.04	96.485	2.021
3	CTRL	23804	660.941	0.685	0.885	223.087	75.712	1.857
3	CTRL	25808	668.923	0.725	0.898	229.314	91.114	1.923
3	CTRL	10919	542.287	0.467	0.708	176.4	39.43	2.284
3	CTRL	22300	882.58	0.36	0.688	259.06	47.935	2.27
3	CTRL	17660	596.68	0.623	0.859	198.204	59.995	1.755
3	CTRL	18813	604.13	0.648	0.87	204.247	62.285	1.737
3	CTRL	22838	651.27	0.677	0.894	202.299	69.043	1.513
3	CTRL	20758	569.27	0.805	0.959	219.317	90.205	1.929
3	CTRL	24731	710.431	0.616	0.874	275.96	78.509	2.915
3	CTRL	21457	674.404	0.593	0.837	264.56	67.246	2.698
3	CTRL	17992	718.285	0.438	0.744	282.243	51.755	2.63
3	CTRL	16606	562.684	0.659	0.87	204.414	62.687	2.074
3	CTRL	21821	672.452	0.606	0.913	275.204	64.77	2.502
3	CTRL	24453	804.911	0.474	0.834	217.92	58.776	2.198
3	CTRL	45540	886.983	0.727	0.911	320.258	119.064	1.932
3	CTRL	20989	709.28	0.524	0.765	247.631	58.993	2.465
3	CTRL	18557	533.339	0.82	0.928	177.722	77.016	1.302
3	CTRL	22269	574.768	0.847	0.948	215.058	103.304	1.679
3	CTRL	33675	784.823	0.687	0.904	296.764	91	2.103
3	CTRL	29073	692.771	0.761	0.923	232.82	97.779	1.674
3	CTRL	19389	695.317	0.504	0.775	241.868	56.865	2.169
3	CTRL	19809	625.677	0.636	0.858	201.517	67.576	1.923
3	CTRL	20739	661.877	0.595	0.834	258.774	67.744	2.262
3	CTRL	13811	456.479	0.833	0.959	174.256	74.691	1.7
3	CTRL	12729	502.676	0.633	0.831	190.924	53.087	2.462
3	CTRL	16758	1010.62	0.206	0.517	352.018	30.932	4.75
3	CTRL	34333	813.948	0.651	0.952	331.145	87.578	2.71
3	CTRL	35283	766.171	0.755	0.956	292.91	101.699	2.022
3	CTRL	30890	676.222	0.849	0.959	259.048	103.099	1.652
3	CTRL	31751	758.793	0.693	0.905	280.777	88.256	1.804
3	CTRL	18823	720.253	0.456	0.69	264.911	51.936	2.6
3	CTRL	23091	619.377	0.756	0.92	219.064	88.445	1.8
3	CTRL	18697	537.226	0.814	0.932	199.151	80.367	1.705
3	CTRL	18318	547.532	0.768	0.912	185.27	78.246	1.542
3	CTRL	36437	771.662	0.769	0.93	291.673	100.978	1.819
3	CTRL	12956	582.145	0.48	0.724	188.112	43.465	2.339
3	CTRL	50999	961.987	0.693	0.886	324.423	113.088	1.547
3	CTRL	44597	1020.75	0.538	0.831	401.643	97.936	2.761
3	CTRL	30949	737.896	0.714	0.926	281.603	94.033	2.029
3	CTRL	23171	745.823	0.523	0.918	335.292	64.459	3.189
3	CTRL	25955	846.307	0.455	0.735	326.167	63.007	3.2
3	CTRL	27088	712.501	0.671	0.891	256.603	79.955	1.924
3	CTRL	16096	740.062	0.369	0.673	286.232	43.954	3.098
3	CTRL	21861	1088.19	0.232	0.569	387.191	37.232	4.959
3	CTRL	92415	1382.69	0.607	0.911	505.253	122.71	2.524
3	CTRL	21336	889.974	0.339	0.696	292.797	46.109	2.849
3	CTRL	40133	912.997	0.605	0.855	327.332	92.786	2.271
3	CTRL	33261	834.717	0.6	0.844	261.947	80.502	1.742
3	CTRL	27466	731.248	0.645	0.837	249.112	76.981	1.73
3	CTRL	16536	603.328	0.571	0.796	229.002	59.515	2.7
3	CTRL	31959	804.609	0.62	0.847	274.527	80.631	2.103
3	CTRL	47049	831.575	0.855	0.961	299.603	153.336	1.541
3	CTRL	43382	842.913	0.767	0.931	307.148	110.546	1.85
3	CTRL	14112	506.563	0.691	0.902	196.255	61.356	2.067
3	CTRL	17806	569.539	0.69	0.918	215.133	64.559	1.891
3	CTRL	28135	937.567	0.402	0.673	281.016	58.637	2.44
3	CTRL	17771	544.16	0.754	0.894	184.889	81.462	1.711
3	CTRL	22915	615.467	0.76	0.914	207.348	76.818	1.385
3	CTRL	27182	757.913	0.595	0.887	303.908	75.936	2.738
3	CTRL	26273	797.961	0.519	0.811	297.168	69.421	2.804
3	CTRL	25001	911.919	0.378	0.744	263.046	53.648	2.604
3	CTRL	19327	668.811	0.543	0.798	252.67	60.163	2.473
3	CTRL	17511	606.177	0.599	0.823	234.764	58.275	2.416
3	CTRL	21961	656.34	0.641	0.859	213.581	71.846	1.694
3	CTRL	21999	602.884	0.761	0.912	201.358	83.079	1.613
3	CTRL	42900	953.982	0.592	0.87	334.845	85.819	2.145
3	CTRL	26322	665.535	0.747	0.889	220.783	79.762	1.583
3	CTRL	19121	545.271	0.808	0.961	188.987	83.777	1.518
3	CTRL	26577	729.717	0.627	0.839	235.185	82.924	1.697
3	CTRL	33078	770.821	0.7	0.879	257.816	95.621	1.852
3	CTRL	19111	623.741	0.617	0.907	252.765	69.915	2.942
3	CTRL	28831	743.72	0.655	0.857	260.34	81.823	1.938
3	CTRL	27230	802.903	0.531	0.828	275.073	66.386	2.249
3	CTRL	22840	799.072	0.45	0.688	294.389	56.792	3.155
3	CTRL	26458	902.461	0.408	0.688	301.033	59.501	2.869
3	CTRL	42174	1012.36	0.517	0.788	330.77	83.073	2.359
3	CTRL	21910	774.383	0.459	0.703	283.693	55.253	2.727
3	CTRL	31786	875.242	0.521	0.781	251.199	72.578	1.771
3	CTRL	34260	892.021	0.541	0.782	294.294	77.93	1.959
3	CTRL	27564	789.171	0.556	0.849	278.298	67.107	2.52
3	CTRL	19765	561.153	0.789	0.948	206.306	78.576	1.697
3	CTRL	29548	849.751	0.514	0.777	259.979	68.308	2.092
3	CTRL	46601	1008.26	0.576	0.798	357.946	93.464	2.3
3	CTRL	28897	801.214	0.566	0.879	281.812	77.819	2.609
3	siSAM68_	15001	684.384	0.402	0.714	206.816	41.444	2.248
3	siSAM68_	19975	932.855	0.288	0.586	336.15	41.385	4.053
3	siSAM68_	22866	1054.71	0.258	0.468	328.688	40.916	4.142
3	siSAM68_	9784	577.774	0.368	0.648	204.707	33.923	2.792
3	siSAM68_	15603	713.819	0.385	0.696	241.108	40.284	2.76
3	siSAM68_	16842	1167.33	0.155	0.399	315.357	26.789	5.207
3	siSAM68_	18959	846.918	0.332	0.61	323.472	45.358	4.424
3	siSAM68_	21655	978.694	0.284	0.576	342.184	42.594	4.569
3	siSAM68_	13834	931.133	0.201	0.438	339.744	29.009	4.929
3	siSAM68_	24367	1108.74	0.249	0.464	381.026	41.327	3.925
3	siSAM68_	20604	1021.73	0.248	0.561	383.659	39.277	4.569
3	siSAM68_	19685	789.631	0.397	0.782	339.559	49.989	3.944
3	siSAM68_	23714	1109.77	0.242	0.534	280.503	41.59	3.559
3	siSAM68_	17860	797.215	0.353	0.594	250.05	44.272	3.118
3	siSAM68_	24257	804.07	0.471	0.694	276.089	59.845	2.875
3	siSAM68_	17626	806.998	0.34	0.663	318.297	41.777	3.609
3	siSAM68_	19395	967.984	0.26	0.595	410.079	39.379	5.23
3	siSAM68_	18348	749.884	0.41	0.691	255.384	50.522	2.625
3	siSAM68_	26951	896.464	0.421	0.832	380.643	55.328	3.667
3	siSAM68_	25349	980.314	0.331	0.755	379.569	50.432	4.094
3	siSAM68_	21200	891.965	0.335	0.544	297.271	46.591	3.868
3	siSAM68_	24012	691.049	0.632	0.903	272.068	71.075	2.407
3	siSAM68_	19850	723.933	0.476	0.755	292.099	57.344	2.853
3	siSAM68_	23364	908.268	0.356	0.607	366.456	54.681	3.1
3	siSAM68_	18761	647.208	0.563	0.809	231.864	60.738	2.673
3	siSAM68_	18351	649.66	0.546	0.771	223.027	58.539	2.144
3	siSAM68_	28368	867.332	0.474	0.727	317.068	63.433	2.837
3	siSAM68_	15987	956.552	0.22	0.57	405.494	31.265	5.786
3	siSAM68_	16704	745.941	0.377	0.635	269.314	46.207	3.256
3	siSAM68_	29155	888.728	0.464	0.76	271.398	63.95	2.375
3	siSAM68_	14306	715.889	0.351	0.632	223.036	39.549	3.019
3	siSAM68_	16848	510.49	0.812	0.922	185.311	81.543	1.814
3	siSAM68_	13720	716.579	0.336	0.574	267.748	38.147	4.529
3	siSAM68_	19201	804.514	0.373	0.645	274.855	47.523	3.162
3	siSAM68_	20292	584.041	0.748	0.924	218.248	68.533	1.724
3	siSAM68_	16375	674.191	0.453	0.74	284.623	51.615	3.333
3	siSAM68_	16318	555.79	0.664	0.871	195.133	58.123	1.768
3	siSAM68_	10448	515.393	0.494	0.746	164.842	39.613	2.14
3	siSAM68_	14001	754.866	0.309	0.604	230.361	38.858	3.309
3	siSAM68_	24918	977.846	0.327	0.596	299.055	50.939	3.822
3	siSAM68_	13683	714.778	0.337	0.58	204.619	38.795	2.608
3	siSAM68_	11954	530.887	0.533	0.822	202.158	45.633	2.912
3	siSAM68_	13408	492.735	0.694	0.882	179.402	56.785	1.759
3	siSAM68_	9038	483.675	0.485	0.742	158.028	38.032	2.5
3	siSAM68_	9861	460.461	0.584	0.847	137.295	42.944	1.79
3	siSAM68_	14093	665.804	0.4	0.644	218.68	39.42	3.114
3	siSAM68_	12909	733.723	0.301	0.579	205.682	36.562	2.62
3	siSAM68_	11144	729.408	0.263	0.554	285.806	28.544	4.059
3	siSAM68_	8960	486.721	0.475	0.729	139.607	36.58	1.93
3	siSAM68_	16433	695.262	0.427	0.675	199.492	47.543	2.577
3	siSAM68_	21053	618.862	0.691	0.914	237.192	72.546	2.298
3	siSAM68_	21307	843.07	0.377	0.653	298.873	49.963	2.969
3	siSAM68_	19551	767.488	0.417	0.701	267.346	49.527	3.739
3	siSAM68_	16266	751.439	0.362	0.722	294.253	40.484	4.418
3	siSAM68_	21010	1044.37	0.242	0.575	435.828	42.014	4.467
3	siSAM68_	22942	731.288	0.539	0.845	236.783	62.625	2.511
3	siSAM68_	15931	801.832	0.311	0.593	321.89	42.157	3.352
3	siSAM68_	11124	1031.12	0.131	0.294	383.751	20.629	7.263
3	siSAM68_	6951	633.452	0.218	0.592	271.184	20.69	7.269
3	siSAM68_	11534	608.517	0.391	0.731	231.175	35.535	2.913
3	siSAM68_	12048	716.119	0.295	0.626	197.914	33.455	2.76
3	siSAM68_	22618	913.053	0.341	0.716	330.847	48.836	3.668
3	siSAM68_	23158	770.535	0.49	0.789	289.386	57.116	3.139
3	siSAM68_	9537	533.894	0.42	0.755	214.441	35.396	3.315
3	siSAM68_	18967	934.6	0.273	0.62	351.869	38.405	4.603
3	siSAM68_	9126	594.84	0.324	0.62	198.806	28.182	3.213
3	siSAM68_	25055	693.881	0.654	0.882	255.039	79.045	2.022
3	siSAM68_	14670	662.147	0.42	0.732	248.429	45.115	3.346
3	siSAM68_	17236	694.42	0.449	0.764	288.21	50.887	2.941
3	siSAM68_	10339	598.822	0.362	0.663	241.168	33.327	4.1
3	siSAM68_	14449	975.608	0.191	0.474	313.984	28.497	5.632
3	siSAM68_	9351	591.317	0.336	0.674	202.485	28.818	3.811
3	siSAM68_	18097	807.918	0.348	0.689	282.804	42.304	3.7
3	siSAM68_	14315	599.766	0.5	0.79	213.46	46.994	2.61
3	siSAM68_	18257	661.457	0.524	0.825	263.281	57.113	2.742
3	siSAM68_	24673	1053.56	0.279	0.61	280.243	47.589	2.9
3	siSAM68_	14235	726.845	0.339	0.602	253.842	38.857	3.408
3	siSAM68_	15548	731.383	0.365	0.69	255.149	42.948	2.822
3	siSAM68_	26245	765.362	0.563	0.821	262.8	67.664	2.353
3	siSAM68_	11322	634.277	0.354	0.564	204.475	34.681	3.437
3	siSAM68_	18568	1114.43	0.188	0.439	315.902	31.583	4.15
3	siSAM68_	18674	741.975	0.426	0.66	248.646	49.217	3.149
3	siSAM68_	16092	676.07	0.442	0.717	264.849	47.719	3.293
3	siSAM68_	22090	882.58	0.356	0.647	274.04	51.448	2.829
3	siSAM68_	32831	1123.58	0.327	0.586	334.175	56.535	2.909
3	siSAM68_	20286	1027.48	0.241	0.537	398.468	37.373	4.086
3	siSAM68_	23982	1140.89	0.232	0.584	476.424	38.915	4.963
3	siSAM68_	23449	659.712	0.677	0.882	224.401	74.754	1.726
3	siSAM68_	18651	825.943	0.344	0.61	286.7	42.799	3.481
3	siSAM68_	38901	1095.2	0.408	0.727	322.056	67.347	2.048
3	siSAM68_	23426	755.001	0.516	0.825	274.651	63.868	2.139
3	siSAM68_	39683	1044.27	0.457	0.803	336.091	69.185	2.423
3	siSAM68_	30874	958.464	0.422	0.695	341.844	68.259	2.662
3	siSAM68_	26126	752.549	0.58	0.809	262.711	70.852	2.151
3	siSAM68_	17061	890.355	0.27	0.658	229.706	36.885	3.012
3	siSAM68_	70618	1769.45	0.283	0.638	703.911	77.084	4.435
3	siSAM68_	16136	621.274	0.525	0.783	226.241	55.956	2.096
3	siSAM68_	13653	565.231	0.537	0.824	222.441	52.016	3.125
3	siSAM68_	13514	644.408	0.409	0.731	241.646	42.4	3.216
3	siSAM68_	24882	925.271	0.365	0.67	345.766	54.118	3.243
3	siSAM68_	13728	1067.89	0.151	0.381	438.731	24.126	9.012
3	siSAM68_	14635	850.918	0.254	0.476	295.413	33.519	3.828
3	siSAM68_	25071	770.265	0.531	0.777	262.42	63	2.406
3	siSAM68_	17397	1051.9	0.198	0.476	396.931	31.81	4.925
3	siSAM68_	25596	1021.7	0.308	0.633	415.278	48.78	4.528
3	siSAM68_	16108	978.996	0.211	0.415	282.574	30.423	5.524
3	siSAM68_	11032	786.656	0.224	0.453	319.277	27.276	6.788
3	siSAM68_	20391	937.472	0.292	0.565	282.082	43.048	3.161
3	siSAM68_	21237	1143.56	0.204	0.425	370	36.135	4.396
