# Supplementary material for: Coalescent RNA-localizing and transcriptional activities of SAM68 modulate adhesion and subendothelial basement membrane assembly
Source: eLife journal article supplement (doi:10.7554/elife.85165), 2023-07-26
Supplement: fig1-data2 [file Figure 1_source data 2.xlsx]

## Sheet: stress fibers
Replicates are from biologically independent experiments.
Replicate	condition	number of_fibers	lenght of_fibers
1	CTRL	103	55.2015
1	CTRL	48	78.8475
1	CTRL	27	64.874
1	CTRL	57	76.8283
1	CTRL	59	46.6053
1	CTRL	47	52.6654
1	CTRL	117	53.4609
1	CTRL	36	72.9645
1	CTRL	49	49.7774
1	CTRL	99	53.2365
1	CTRL	78	54.386
1	CTRL	66	69.3331
1	CTRL	57	67.897
1	CTRL	85	59.5224
1	CTRL	67	59.9685
1	CTRL	58	65.0891
2	CTRL	49	50.7545
2	CTRL	24	48.6206
2	CTRL	59	104.197
2	CTRL	112	57.6125
2	CTRL	58	61.5
2	CTRL	45	51.3695
2	CTRL	72	55.8949
2	CTRL	96	58.0648
2	CTRL	57	77.9811
2	CTRL	52	30.042
3	CTRL	50	55.3551
3	CTRL	69	56.3353
3	CTRL	108	60.9941
3	CTRL	97	63.203
3	CTRL	96	71.2059
3	CTRL	69	56.5424
3	CTRL	51	59.1814
3	CTRL	49	48.8158
3	CTRL	78	48.1594
3	CTRL	57	57.6413
3	CTRL	100	69.2555
3	CTRL	51	61.7456
3	CTRL	66	55.1675
3	CTRL	72	58.3602
1	siSAM68_	23	48.9715
1	siSAM68_	23	76.7529
1	siSAM68_	37	60.0732
1	siSAM68_	45	89.0304
1	siSAM68_	16	66.1375
1	siSAM68_	15	83.9533
1	siSAM68_	11	88.3254
1	siSAM68_	4	73.4671
1	siSAM68_	14	64.0983
1	siSAM68_	16	60.0629
1	siSAM68_	10	53.6787
1	siSAM68_	14	67.1173
1	siSAM68_	6	133.615
1	siSAM68_	22	91.3342
1	siSAM68_	12	62.1629
1	siSAM68_	16	68.0317
2	siSAM68_	14	58.8395
2	siSAM68_	16	60.4949
2	siSAM68_	17	58.3962
2	siSAM68_	17	67.6633
2	siSAM68_	19	57.5511
2	siSAM68_	22	61.2691
2	siSAM68_	6	137.072
2	siSAM68_	7	62.711
2	siSAM68_	14	75.828
2	siSAM68_	9	99.1402
2	siSAM68_	12	54.4811
3	siSAM68_	19	63.3906
3	siSAM68_	18	54.2106
3	siSAM68_	25	54.9611
3	siSAM68_	13	50.0683
3	siSAM68_	18	49.7523
3	siSAM68_	22	67.237
3	siSAM68_	25	57.7821
3	siSAM68_	8	56.5198
3	siSAM68_	12	53.9666
3	siSAM68_	12	59.3373
3	siSAM68_	20	55.4201
3	siSAM68_	14	71.5399
3	siSAM68_	14	68.9957
3	siSAM68_	34	65.923
