# Supplementary material for: Coalescent RNA-localizing and transcriptional activities of SAM68 modulate adhesion and subendothelial basement membrane assembly
Source: eLife journal article supplement (doi:10.7554/elife.85165), 2023-07-26
Supplement: fig1-data3 [file Figure 1_source data 3.xlsx]

## Sheet: adhesion complexes
Replicates are from biologically independent experiments.
Results from Area to Solidity are represented by the average of the mesures observed for 1 cell with 'n' vinculin adhesions. 'n' number of adhesions per cell is given in the last column
Replicate	Condition	Area	Circ.	Feret	FeretX	FeretY	FeretAngle	MinFeret	AR	Round	Solidity	Number of vinculin adhesions
1	CTRL	0.900316	0.431526	2.04486	472.561	318.246	87.1973	0.761667	3.54672	0.348719	0.699667	57
1	CTRL	1.06989	0.503651	1.88994	337.972	505.17	93.9333	0.89766	2.58823	0.457387	0.725264	53
1	CTRL	0.940298	0.368368	2.05625	366.737	403.105	71.7298	0.896912	3.23777	0.400702	0.638947	57
1	CTRL	0.772521	0.48326	1.83733	380.151	331.466	107.611	0.757397	3.01384	0.432	0.711726	73
1	CTRL	0.776227	0.442273	1.74533	308.955	306.97	85.761	0.826985	2.61821	0.456	0.678167	66
1	CTRL	0.972849	0.461704	1.88677	514.075	573.453	95.7512	0.908296	2.59572	0.464277	0.68139	79.5
1	CTRL	0.648548	0.465959	1.81612	440.384	403.89	102.928	0.683027	3.48668	0.373699	0.69626	3
1	CTRL	1.10177	0.508532	1.96898	298.17	239.234	94.3917	0.979936	2.37877	0.480255	0.723489	47
1	CTRL	0.897437	0.496281	1.86759	217.458	425.542	100.862	0.851594	2.63205	0.450344	0.715448	96
1	CTRL	1.23721	0.504792	2.20767	510.425	248.008	95.5232	0.920792	2.84009	0.431058	0.728825	120
1	CTRL	0.868437	0.59075	1.61715	294.847	469.076	89.0389	0.850674	2.1434	0.526771	0.771229	144
1	CTRL	0.906765	0.482626	1.9501	292.93	481.087	71.6214	0.777661	3.08078	0.389539	0.723374	115
1	CTRL	0.688822	0.497981	1.66511	369.411	217.664	82.6702	0.752234	2.72719	0.44072	0.719738	53.5
1	CTRL	1.09879	0.424231	2.09177	215.956	339.484	95.6067	0.961363	2.8841	0.40911	0.684077	91
1	CTRL	0.68616	0.508307	1.76201	314.907	436.133	107.669	0.67848	3.28149	0.38652	0.742973	75
1	siSAM68_	0.491694	0.576306	1.27678	244.972	147.917	98.6061	0.691722	2.18728	0.494417	0.7355	36
1	siSAM68_	0.670067	0.501567	1.67217	444.1	147.933	92.4639	0.748333	2.8148	0.431467	0.721867	30
1	siSAM68_	0.502083	0.5025	1.42112	219.875	402.875	95.8922	0.667292	2.57083	0.451	0.702875	24
1	siSAM68_	0.541167	0.5813	1.38097	288.6	468.133	71.8358	0.676267	2.50257	0.478633	0.761733	30
1	siSAM68_	0.399467	0.554667	1.18233	240.2	230.133	76.7151	0.6232	2.25773	0.490467	0.740867	15
1	siSAM68_	0.446781	0.591281	1.26131	241.781	282.062	85.5996	0.64625	2.35069	0.501437	0.759813	32
1	siSAM68_	0.790706	0.518922	1.67547	238.588	318.51	97.1832	0.796059	2.52937	0.465745	0.718765	51
1	siSAM68_	0.540571	0.514571	1.54914	253.686	372.114	102.05	0.671343	3.01669	0.4238	0.726171	35
1	siSAM68_	0.577471	0.543176	1.43929	308.176	184.941	105.775	0.695059	2.66453	0.422059	0.738412	17
1	siSAM68_	0.573156	0.572533	1.42453	475.222	340.311	96.1843	0.684067	2.53093	0.462067	0.764422	45
1	siSAM68_	0.560929	0.478071	1.48683	311.976	163.952	86.3766	0.713167	2.58545	0.431476	0.700357	42
2	CTRL	0.7	0.50093	1.59514	198.86	313.535	85.2585	0.780116	2.4926	0.473651	0.73514	43
2	CTRL	0.657075	0.5471	1.64243	413.3	248.6	90.2861	0.6719	3.04575	0.45455	0.745175	40
2	CTRL	0.811509	0.5052	1.62313	352.818	315.709	95.8173	0.869364	2.16416	0.509964	0.715364	55
2	CTRL	0.880623	0.473638	1.77731	368.938	585.531	76.0077	0.833862	2.62691	0.464208	0.699731	130
2	CTRL	0.640752	0.510845	1.64039	326.907	493.373	103.503	0.672193	3.0402	0.40264	0.731683	161
2	CTRL	0.831362	0.479284	1.78654	608.092	251.61	107.998	0.810539	2.70452	0.455667	0.713418	141
2	CTRL	0.973506	0.456	2.07448	322.41	373.157	85.1449	0.840217	3.08525	0.423422	0.706277	83
2	CTRL	0.590588	0.538976	1.4616	346.682	471.471	70.0848	0.717047	2.48934	0.458494	0.734906	85
2	CTRL	0.931418	0.4664	1.93264	375.836	232.218	80.952	0.807982	2.89031	0.427473	0.709073	55
2	CTRL	0.968335	0.507165	1.79929	320.973	475.912	86.2742	0.91833	2.25702	0.495808	0.723258	60.6
2	CTRL	0.950193	0.444958	2.01886	435.252	335.353	71.646	0.86695	2.91106	0.424655	0.680807	119
2	CTRL	0.984567	0.465683	2.11922	371.317	375.817	110.849	0.842183	3.17407	0.4059	0.7082	60
2	CTRL	0.741214	0.487443	1.70657	309.114	339.243	91.5518	0.763014	2.69047	0.439071	0.707557	70
2	CTRL	0.906985	0.445672	2.00995	502.16	494.008	105.428	0.781191	3.39969	0.383	0.692481	43.6
2	CTRL	1.10154	0.45481	1.95589	194.397	400.286	81.1178	1.03479	2.25848	0.510143	0.692476	63
2	CTRL	0.804321	0.482214	1.70377	310.464	266.661	91.1946	0.846268	2.49162	0.48025	0.724018	56
2	CTRL	0.876257	0.496676	1.79034	367.26	377.895	99.1258	0.802543	2.63185	0.450048	0.716295	52.5
2	siSAM68_	0.49	0.567034	1.32241	320.069	249.69	93.2856	0.659552	2.35759	0.476966	0.732655	18
2	siSAM68_	0.463412	0.592824	1.23447	307.471	232.588	70.5452	0.672294	2.08576	0.521765	0.754882	17
2	siSAM68_	0.52481	0.503143	1.48448	443.571	282.143	106.656	0.698524	2.76314	0.469095	0.721571	21
2	siSAM68_	0.579763	0.476644	1.46478	332.576	402.492	95.534	0.731254	2.6398	0.465695	0.703627	59
2	siSAM68_	0.536286	0.484762	1.34829	394.952	436.571	88.7533	0.760333	2.03524	0.555524	0.686667	21
2	siSAM68_	0.550489	0.484596	1.44543	393.383	415.851	83.1296	0.752723	2.29111	0.500787	0.692957	47
2	siSAM68_	0.5168	0.528933	1.30853	441.333	193.733	99.4222	0.745267	1.95113	0.571933	0.716533	15
2	siSAM68_	0.443465	0.58207	1.23891	453.488	441.395	92.9067	0.64707	2.36912	0.500256	0.749744	43
2	siSAM68_	0.604875	0.518094	1.54328	200.125	258.656	109.748	0.745656	2.54859	0.446469	0.712125	32
2	siSAM68_	0.680577	0.557308	1.52915	592.269	510.308	79.6699	0.775385	2.285	0.494692	0.745962	26
2	siSAM68_	0.403647	0.616	1.22176	341.471	271.294	94.2506	0.581294	2.58759	0.446882	0.774118	17
2	siSAM68_	0.548696	0.496739	1.4097	373.348	346.696	92.746	0.736435	2.343	0.466739	0.694	23
2	siSAM68_	0.422484	0.522161	1.22968	237.516	600.839	75.0332	0.629516	2.28487	0.484968	0.729903	31
2	siSAM68_	0.442167	0.4995	1.36533	231.833	224.167	67.583	0.651167	2.66883	0.392833	0.6845	6
2	siSAM68_	0.562579	0.468105	1.49332	312.947	835.474	116.359	0.728737	2.47174	0.443842	0.698105	19
2	siSAM68_	0.508857	0.559429	1.24586	308.571	252.143	93.3211	0.753	1.96757	0.535571	0.730857	15
2	siSAM68_	0.4606	0.469067	1.41067	225.4	316.6	88.8608	0.6512	2.779	0.437	0.674133	7
3	CTRL	0.523645	0.540258	1.49703	259.823	696.71	63.1388	0.621629	3.04745	0.412274	0.748661	62
3	CTRL	0.58469	0.478071	1.57338	229.881	431.548	63.535	0.717952	2.6884	0.449548	0.707381	42
3	CTRL	0.7845	0.485808	1.89433	578.282	253.91	102.802	0.733513	3.28776	0.389603	0.719256	78
3	CTRL	0.692835	0.503714	1.76135	495.758	347.637	114.937	0.671538	3.23955	0.368297	0.734088	91
3	CTRL	0.631118	0.516838	1.60748	414.228	349.404	99.3785	0.678206	2.95812	0.412103	0.740868	136
3	CTRL	0.642371	0.462581	1.71587	354.032	458.016	77.2106	0.685032	3.25168	0.390339	0.704403	31
3	CTRL	0.610857	0.549857	1.5019	363.714	294.238	101.851	0.693738	2.55052	0.456667	0.753595	42
3	CTRL	0.815508	0.45881	1.86138	457.159	293.476	97.0418	0.749651	3.018	0.40473	0.699413	63
3	CTRL	0.739878	0.495933	1.73862	500.889	542.633	89.4385	0.731789	2.957	0.406333	0.730544	90
3	CTRL	0.674081	0.518527	1.64005	488.27	364.203	64.6731	0.716108	2.93081	0.420662	0.747554	37
3	CTRL	0.637229	0.489312	1.58751	306.064	462.174	92.5203	0.711899	2.71325	0.448679	0.72878	109
3	CTRL	0.537506	0.473157	1.55746	353.034	332.506	81.2211	0.670618	2.9494	0.429573	0.705775	89
3	CTRL	0.673434	0.517904	1.59124	653.191	483.36	92.6697	0.750316	2.55286	0.455441	0.729676	45.3
3	CTRL	0.66291	0.50281	1.67337	244.61	290.97	101.312	0.69563	2.97894	0.40084	0.72499	50
3	CTRL	0.661182	0.455409	1.76035	399.348	227.379	84.273	0.705136	3.25773	0.404606	0.699121	67
3	CTRL	0.593238	0.488841	1.62776	433.444	505.714	116.591	0.655317	3.1613	0.378365	0.724365	21
3	CTRL	0.59192	0.476527	1.62621	433.924	479.248	63.4198	0.691332	2.99898	0.411439	0.693385	128
3	CTRL	0.649141	0.561023	1.56261	451.547	308.984	88.874	0.688398	2.7277	0.440477	0.751477	101
3	CTRL	1.04837	0.431248	2.16231	296.554	409.376	105.65	0.82905	3.20757	0.394673	0.695455	28
3	CTRL	0.631964	0.534	1.66111	592.75	437.964	96.1555	0.600893	3.39596	0.333786	0.774036	131
3	siSAM68_	0.4532	0.548967	1.29363	383.533	392.3	95.8533	0.654067	2.38917	0.465367	0.728433	23
3	siSAM68_	0.488571	0.502571	1.37357	366.286	322.714	110.344	0.717143	2.41971	0.442857	0.716857	7
3	siSAM68_	0.40125	0.521625	1.20112	186.25	259.375	100.972	0.63125	2.30625	0.4805	0.7025	8
3	siSAM68_	0.36975	0.586333	1.14275	265.75	359.833	102.283	0.56625	2.4865	0.4495	0.7675	12
3	siSAM68_	0.447	0.527125	1.32625	379.625	344.417	92.287	0.624833	2.77617	0.435917	0.726583	19
3	siSAM68_	0.427522	0.644391	1.21335	523.043	382.696	84.9979	0.615304	2.38509	0.524652	0.787217	23
3	siSAM68_	0.4856	0.4735	1.383	166.2	377	105.772	0.629	2.8626	0.3962	0.6889	10
3	siSAM68_	0.43375	0.5981	1.21465	172.6	284.35	105.141	0.6252	2.28965	0.5064	0.75145	20
3	siSAM68_	0.394522	0.550739	1.286	183.174	226.13	113.702	0.561565	3.00843	0.402522	0.747913	23
3	siSAM68_	0.424	0.3877	1.3755	276.1	305.7	103.455	0.6482	2.78925	0.45765	0.6561	20
3	siSAM68_	0.42375	0.52175	1.29537	254.25	300.75	106.362	0.64275	2.74487	0.487625	0.71175	8
3	siSAM68_	0.304	0.5062	1.1306	220.4	334.4	100.088	0.51	2.895	0.4036	0.7184	5
3	siSAM68_	0.308333	0.550667	1.10567	134.667	297.333	109.608	0.517	2.721	0.453667	0.726667	3
3	siSAM68_	0.367231	0.549231	1.11392	417.385	291.462	74.6374	0.625	2.09569	0.541231	0.729	13
3	siSAM68_	0.482125	0.549125	1.3505	334.125	260	85.1663	0.674625	2.4455	0.454125	0.716125	8
3	siSAM68_	0.38325	0.548813	1.19256	287.812	172.812	92.5357	0.60125	2.43294	0.453437	0.721625	16
3	siSAM68_	0.393625	0.52225	1.35587	173.25	526.125	80.6975	0.5035	3.504	0.346625	0.764	8
3	siSAM68_	0.529438	0.480687	1.4965	205.875	269.188	115.998	0.651312	2.85075	0.410562	0.701688	16
3	siSAM68_	0.478312	0.6165	1.23794	302.938	210.875	119.029	0.662062	2.15713	0.513375	0.773875	16
3	siSAM68_	0.29875	0.6995	1.036	314.75	387.75	126.974	0.45375	2.61275	0.415	0.832	4
3	siSAM68_	0.325571	0.646	1.06286	246.571	590	87.7983	0.569143	2.52243	0.567	0.776714	7
