# Supplementary material for: Coalescent RNA-localizing and transcriptional activities of SAM68 modulate adhesion and subendothelial basement membrane assembly
Source: eLife journal article supplement (doi:10.7554/elife.85165), 2023-07-26
Supplement: fig3-data1 [file Figure 3_source data 1.xlsx]

## Sheet: pFAK397 dots
Replicates are from biologically independent experiments.
Count = number of pFAK397 foci in a 150x150 pixel grid around bead contact with the cells (we choose cell that are in contact with only 1 bead)
Replicate	Condition	Count
1	CTRL	164
1	CTRL	82
1	CTRL	115
1	CTRL	184
1	CTRL	78
1	CTRL	145
1	CTRL	253
1	CTRL	181
1	CTRL	185
1	siSAM68_	148
1	siSAM68_	117
1	siSAM68_	136
1	siSAM68_	95
1	siSAM68_	98
1	siSAM68_	136
2	CTRL	109
2	CTRL	203
2	CTRL	79
2	CTRL	132
2	CTRL	143
2	CTRL	81
2	siSAM68_	124
2	siSAM68_	104
2	siSAM68_	108
2	siSAM68_	64
2	siSAM68_	56
2	siSAM68_	142
3	CTRL	163
3	CTRL	276
3	CTRL	224
3	CTRL	152
3	CTRL	96
3	CTRL	156
3	CTRL	104
3	siSAM68_	94
3	siSAM68_	125
3	siSAM68_	95
3	siSAM68_	136
3	siSAM68_	117
3	siSAM68_	80
3	siSAM68_	120
3	siSAM68_	164
3	siSAM68_	183
