# Supplementary material for: Coalescent RNA-localizing and transcriptional activities of SAM68 modulate adhesion and subendothelial basement membrane assembly
Source: eLife journal article supplement (doi:10.7554/elife.85165), 2023-07-26
Supplement: fig3-data2 [file Figure 3_source data 2.xlsx]

## Sheet: pFAK397 dots with mutant
Replicates are from biologically independent experiments.
Count = number of pFAK397 foci in a 150x150 pixel grid around bead contact with the cells (we choose cell that are in contact with only 1 bead)
Replicate	Condition	Count
1	CTRL	116
1	CTRL	81
1	CTRL	146
1	CTRL	125
1	CTRL	95
1	CTRL	40
1	CTRL	131
1	CTRL	174
1	SAM68DKH	111
1	SAM68DKH	52
1	SAM68DKH	81
1	SAM68DKH	113
1	SAM68DKH	79
1	SAM68DKH	102
1	SAM68DKH	118
1	SAM68P358A	192
1	SAM68P358A	159
1	SAM68P358A	78
1	SAM68P358A	108
1	SAM68P358A	72
1	SAM68P358A	99
1	SAM68P358A	164
2	CTRL	34
2	CTRL	75
2	CTRL	69
2	CTRL	15
2	CTRL	61
2	CTRL	41
2	CTRL	101
2	SAM68DKH	10
2	SAM68DKH	13
2	SAM68DKH	39
2	SAM68DKH	49
2	SAM68DKH	60
2	SAM68DKH	17
2	SAM68DKH	24
2	SAM68P358A	84
2	SAM68P358A	85
2	SAM68P358A	73
2	SAM68P358A	24
2	SAM68P358A	127
2	SAM68P358A	57
2	SAM68P358A	69
2	SAM68P358A	29
2	SAM68P358A	64
2	SAM68P358A	74
2	SAM68P358A	74
3	CTRL	73
3	CTRL	80
3	CTRL	61
3	CTRL	80
3	CTRL	43
3	CTRL	78
3	CTRL	69
3	SAM68DKH	24
3	SAM68DKH	59
3	SAM68DKH	53
3	SAM68DKH	19
3	SAM68DKH	28
3	SAM68DKH	27
3	SAM68DKH	14
3	SAM68DKH	45
3	SAM68DKH	74
3	SAM68DKH	37
3	SAM68P358A	81
3	SAM68P358A	46
3	SAM68P358A	129
3	SAM68P358A	114
3	SAM68P358A	159
3	SAM68P358A	136
3	SAM68P358A	133
3	SAM68P358A	151
3	SAM68P358A	44
3	SAM68P358A	49
4	CTRL	68
4	CTRL	87
4	CTRL	122
4	CTRL	83
4	CTRL	67
4	CTRL	128
4	CTRL	174
4	CTRL	121
4	SAM68DKH	55
4	SAM68DKH	64
4	SAM68DKH	21
4	SAM68DKH	82
4	SAM68DKH	46
4	SAM68DKH	39
4	SAM68P358A	212
4	SAM68P358A	68
4	SAM68P358A	96
4	SAM68P358A	162
4	SAM68P358A	105
4	SAM68P358A	67
4	SAM68P358A	174
4	SAM68P358A	129
