# Supplementary material for: Coalescent RNA-localizing and transcriptional activities of SAM68 modulate adhesion and subendothelial basement membrane assembly
Source: eLife journal article supplement (doi:10.7554/elife.85165), 2023-07-26
Supplement: fig4-data1 [file Figure 4_source data 1.xlsx]

## Sheet: bactin mRNA at beads
Replicates are from biologically independent experiments.
beads_= count of bactin mRNA particles in a 150x150 pixel grid around bead contact with the cells (we choose cell that are in contact with only 1 bead)
cyto_= count of bactin mRNA particles in a 150x150 pixel grid elswhere in the cytoplasm with at least 10µm radius far form the contact point of the bead.
Replicate	Condition	Count
1	bead_CTRL	372
1	bead_CTRL	495
1	bead_CTRL	508
1	bead_CTRL	544
1	bead_CTRL	510
1	bead_CTRL	400
1	bead_CTRL	369
1	bead_CTRL	333
1	bead_CTRL	474
1	bead_CTRL	522
1	bead_CTRL	282
1	bead_CTRL	463
1	bead_CTRL	501
1	bead_CTRL	437
1	bead_CTRL	232
1	bead_CTRL	335
1	bead_CTRL	219
1	bead_CTRL	275
2	bead_CTRL	248
2	bead_CTRL	260
2	bead_CTRL	390
2	bead_CTRL	346
2	bead_CTRL	237
2	bead_CTRL	387
2	bead_CTRL	241
2	bead_CTRL	449
2	bead_CTRL	356
2	bead_CTRL	162
2	bead_CTRL	464
2	bead_CTRL	396
2	bead_CTRL	291
2	bead_CTRL	214
2	bead_CTRL	405
3	bead_CTRL	371
3	bead_CTRL	263
3	bead_CTRL	260
3	bead_CTRL	291
3	bead_CTRL	368
3	bead_CTRL	392
3	bead_CTRL	389
3	bead_CTRL	246
3	bead_CTRL	252
3	bead_CTRL	421
3	bead_CTRL	428
3	bead_CTRL	499
3	bead_CTRL	166
3	bead_CTRL	352
3	bead_CTRL	330
3	bead_CTRL	274
4	bead_CTRL	567
4	bead_CTRL	337
4	bead_CTRL	421
4	bead_CTRL	287
4	bead_CTRL	391
4	bead_CTRL	350
4	bead_CTRL	326
4	bead_CTRL	277
4	bead_CTRL	346
4	bead_CTRL	340
4	bead_CTRL	407
4	bead_CTRL	393
4	bead_CTRL	430
4	bead_CTRL	417
4	bead_CTRL	370
4	bead_CTRL	439
4	bead_CTRL	454
4	bead_CTRL	315
4	bead_CTRL	346
4	bead_CTRL	240
4	bead_CTRL	371
5	bead_CTRL	424
5	bead_CTRL	385
5	bead_CTRL	412
5	bead_CTRL	499
5	bead_CTRL	327
5	bead_CTRL	361
5	bead_CTRL	455
5	bead_CTRL	388
5	bead_CTRL	407
5	bead_CTRL	310
5	bead_CTRL	290
5	bead_CTRL	351
1	bead_siSAM68_	453
1	bead_siSAM68_	255
1	bead_siSAM68_	353
1	bead_siSAM68_	171
1	bead_siSAM68_	340
1	bead_siSAM68_	269
1	bead_siSAM68_	197
1	bead_siSAM68_	165
1	bead_siSAM68_	428
1	bead_siSAM68_	384
1	bead_siSAM68_	381
1	bead_siSAM68_	523
1	bead_siSAM68_	249
1	bead_siSAM68_	398
1	bead_siSAM68_	331
1	bead_siSAM68_	282
1	bead_siSAM68_	289
2	bead_siSAM68_	258
2	bead_siSAM68_	245
2	bead_siSAM68_	209
2	bead_siSAM68_	274
2	bead_siSAM68_	413
2	bead_siSAM68_	211
2	bead_siSAM68_	235
2	bead_siSAM68_	391
2	bead_siSAM68_	224
2	bead_siSAM68_	190
2	bead_siSAM68_	179
2	bead_siSAM68_	90
2	bead_siSAM68_	273
2	bead_siSAM68_	266
2	bead_siSAM68_	129
2	bead_siSAM68_	281
3	bead_siSAM68_	148
3	bead_siSAM68_	164
3	bead_siSAM68_	234
3	bead_siSAM68_	237
3	bead_siSAM68_	292
3	bead_siSAM68_	244
3	bead_siSAM68_	362
3	bead_siSAM68_	273
3	bead_siSAM68_	283
3	bead_siSAM68_	257
3	bead_siSAM68_	250
3	bead_siSAM68_	252
3	bead_siSAM68_	322
3	bead_siSAM68_	324
3	bead_siSAM68_	245
3	bead_siSAM68_	242
3	bead_siSAM68_	170
4	bead_siSAM68_	245
4	bead_siSAM68_	224
4	bead_siSAM68_	382
4	bead_siSAM68_	348
4	bead_siSAM68_	335
4	bead_siSAM68_	432
4	bead_siSAM68_	317
4	bead_siSAM68_	389
4	bead_siSAM68_	383
4	bead_siSAM68_	320
4	bead_siSAM68_	315
4	bead_siSAM68_	292
4	bead_siSAM68_	437
4	bead_siSAM68_	284
4	bead_siSAM68_	270
5	bead_siSAM68_	316
5	bead_siSAM68_	441
5	bead_siSAM68_	383
5	bead_siSAM68_	396
5	bead_siSAM68_	303
5	bead_siSAM68_	291
5	bead_siSAM68_	377
5	bead_siSAM68_	459
5	bead_siSAM68_	344
5	bead_siSAM68_	334
5	bead_siSAM68_	314
5	bead_siSAM68_	248
5	bead_siSAM68_	271
5	bead_siSAM68_	187
5	bead_siSAM68_	280
1	cyto_CTRL	143
1	cyto_CTRL	111
1	cyto_CTRL	103
1	cyto_CTRL	96
1	cyto_CTRL	97
1	cyto_CTRL	90
1	cyto_CTRL	69
1	cyto_CTRL	89
1	cyto_CTRL	98
1	cyto_CTRL	105
1	cyto_CTRL	84
1	cyto_CTRL	78
1	cyto_CTRL	114
1	cyto_CTRL	26
1	cyto_CTRL	87
1	cyto_CTRL	121
1	cyto_CTRL	98
1	cyto_CTRL	55
2	cyto_CTRL	82
2	cyto_CTRL	122
2	cyto_CTRL	100
2	cyto_CTRL	125
2	cyto_CTRL	92
2	cyto_CTRL	84
2	cyto_CTRL	97
2	cyto_CTRL	85
2	cyto_CTRL	49
2	cyto_CTRL	64
2	cyto_CTRL	58
2	cyto_CTRL	92
2	cyto_CTRL	88
2	cyto_CTRL	99
2	cyto_CTRL	76
3	cyto_CTRL	68
3	cyto_CTRL	81
3	cyto_CTRL	55
3	cyto_CTRL	94
3	cyto_CTRL	76
3	cyto_CTRL	76
3	cyto_CTRL	84
3	cyto_CTRL	58
3	cyto_CTRL	61
3	cyto_CTRL	90
3	cyto_CTRL	53
3	cyto_CTRL	74
3	cyto_CTRL	44
3	cyto_CTRL	98
3	cyto_CTRL	44
3	cyto_CTRL	63
4	cyto_CTRL	99
4	cyto_CTRL	103
4	cyto_CTRL	97
4	cyto_CTRL	108
4	cyto_CTRL	99
4	cyto_CTRL	80
4	cyto_CTRL	101
4	cyto_CTRL	51
4	cyto_CTRL	64
4	cyto_CTRL	119
4	cyto_CTRL	109
4	cyto_CTRL	61
4	cyto_CTRL	91
4	cyto_CTRL	83
4	cyto_CTRL	63
4	cyto_CTRL	90
4	cyto_CTRL	73
4	cyto_CTRL	73
4	cyto_CTRL	104
4	cyto_CTRL	47
4	cyto_CTRL	46
5	cyto_CTRL	85
5	cyto_CTRL	67
5	cyto_CTRL	103
5	cyto_CTRL	66
5	cyto_CTRL	55
5	cyto_CTRL	77
5	cyto_CTRL	88
5	cyto_CTRL	58
5	cyto_CTRL	93
5	cyto_CTRL	95
5	cyto_CTRL	24
5	cyto_CTRL	80
1	cyto_siSAM68_	125
1	cyto_siSAM68_	75
1	cyto_siSAM68_	84
1	cyto_siSAM68_	118
1	cyto_siSAM68_	97
1	cyto_siSAM68_	52
1	cyto_siSAM68_	119
1	cyto_siSAM68_	84
1	cyto_siSAM68_	120
1	cyto_siSAM68_	106
1	cyto_siSAM68_	98
1	cyto_siSAM68_	93
1	cyto_siSAM68_	112
1	cyto_siSAM68_	102
1	cyto_siSAM68_	122
1	cyto_siSAM68_	46
1	cyto_siSAM68_	115
2	cyto_siSAM68_	115
2	cyto_siSAM68_	107
2	cyto_siSAM68_	66
2	cyto_siSAM68_	87
2	cyto_siSAM68_	83
2	cyto_siSAM68_	61
2	cyto_siSAM68_	80
2	cyto_siSAM68_	75
2	cyto_siSAM68_	63
2	cyto_siSAM68_	63
2	cyto_siSAM68_	42
2	cyto_siSAM68_	38
2	cyto_siSAM68_	76
2	cyto_siSAM68_	67
2	cyto_siSAM68_	57
2	cyto_siSAM68_	76
3	cyto_siSAM68_	64
3	cyto_siSAM68_	61
3	cyto_siSAM68_	60
3	cyto_siSAM68_	47
3	cyto_siSAM68_	71
3	cyto_siSAM68_	75
3	cyto_siSAM68_	78
3	cyto_siSAM68_	76
3	cyto_siSAM68_	61
3	cyto_siSAM68_	68
3	cyto_siSAM68_	77
3	cyto_siSAM68_	82
3	cyto_siSAM68_	81
3	cyto_siSAM68_	70
3	cyto_siSAM68_	33
3	cyto_siSAM68_	50
3	cyto_siSAM68_	65
4	cyto_siSAM68_	98
4	cyto_siSAM68_	139
4	cyto_siSAM68_	87
4	cyto_siSAM68_	116
4	cyto_siSAM68_	105
4	cyto_siSAM68_	123
4	cyto_siSAM68_	122
4	cyto_siSAM68_	81
4	cyto_siSAM68_	110
4	cyto_siSAM68_	83
4	cyto_siSAM68_	106
4	cyto_siSAM68_	89
4	cyto_siSAM68_	78
4	cyto_siSAM68_	117
4	cyto_siSAM68_	116
5	cyto_siSAM68_	111
5	cyto_siSAM68_	107
5	cyto_siSAM68_	123
5	cyto_siSAM68_	83
5	cyto_siSAM68_	95
5	cyto_siSAM68_	87
5	cyto_siSAM68_	97
5	cyto_siSAM68_	86
5	cyto_siSAM68_	82
5	cyto_siSAM68_	90
5	cyto_siSAM68_	58
5	cyto_siSAM68_	51
5	cyto_siSAM68_	72
5	cyto_siSAM68_	74
5	cyto_siSAM68_	66
