# Supplementary material for: Coalescent RNA-localizing and transcriptional activities of SAM68 modulate adhesion and subendothelial basement membrane assembly
Source: eLife journal article supplement (doi:10.7554/elife.85165), 2023-07-26
Supplement: fig4-data2 [file Figure 4_source data 2.xlsx]

## Sheet: Blocking oligos_
Replicates are from biologically independent experiments.
beads_= count of bactin mRNA particles in a 150x150 pixel grid around bead contact with the cells (we choose cell that are in contact with only 1 bead)
cyto_= count of bactin mRNA particles in a 150x150 pixel grid elswhere in the cytoplasm with at least 10µm radius far form the contact point of the bead.
Replicate	Condition	Count
1	beads_CTRL	238
1	beads_CTRL	312
1	beads_CTRL	349
1	beads_CTRL	332
1	beads_CTRL	324
1	beads_CTRL	336
1	beads_CTRL	285
1	beads_CTRL	196
1	beads_CTRL	182
1	beads_CTRL	306
1	beads_CTRL	337
1	beads_CTRL	287
1	beads_CTRL	351
1	beads_CTRL	316
2	beads_CTRL	325
2	beads_CTRL	281
2	beads_CTRL	300
2	beads_CTRL	334
2	beads_CTRL	248
2	beads_CTRL	439
2	beads_CTRL	387
2	beads_CTRL	333
2	beads_CTRL	311
2	beads_CTRL	302
2	beads_CTRL	435
2	beads_CTRL	413
2	beads_CTRL	465
2	beads_CTRL	323
2	beads_CTRL	357
3	beads_CTRL	370
3	beads_CTRL	428
3	beads_CTRL	299
3	beads_CTRL	364
3	beads_CTRL	419
3	beads_CTRL	346
3	beads_CTRL	236
3	beads_CTRL	388
3	beads_CTRL	288
3	beads_CTRL	282
3	beads_CTRL	365
3	beads_CTRL	253
3	beads_CTRL	299
3	beads_CTRL	258
3	beads_CTRL	276
3	beads_CTRL	245
3	beads_CTRL	407
3	beads_CTRL	390
3	beads_CTRL	390
1	beads_SBE2.&SBE1.	207
1	beads_SBE2.&SBE1.	351
1	beads_SBE2.&SBE1.	283
1	beads_SBE2.&SBE1.	289
1	beads_SBE2.&SBE1.	273
1	beads_SBE2.&SBE1.	273
1	beads_SBE2.&SBE1.	189
1	beads_SBE2.&SBE1.	252
1	beads_SBE2.&SBE1.	258
1	beads_SBE2.&SBE1.	176
1	beads_SBE2.&SBE1.	224
1	beads_SBE2.&SBE1.	239
2	beads_SBE2.&SBE1.	282
2	beads_SBE2.&SBE1.	231
2	beads_SBE2.&SBE1.	295
2	beads_SBE2.&SBE1.	366
2	beads_SBE2.&SBE1.	296
2	beads_SBE2.&SBE1.	286
2	beads_SBE2.&SBE1.	320
2	beads_SBE2.&SBE1.	229
2	beads_SBE2.&SBE1.	328
2	beads_SBE2.&SBE1.	231
2	beads_SBE2.&SBE1.	273
2	beads_SBE2.&SBE1.	305
2	beads_SBE2.&SBE1.	251
2	beads_SBE2.&SBE1.	343
2	beads_SBE2.&SBE1.	274
2	beads_SBE2.&SBE1.	248
3	beads_SBE2.&SBE1.	279
3	beads_SBE2.&SBE1.	281
3	beads_SBE2.&SBE1.	218
3	beads_SBE2.&SBE1.	213
3	beads_SBE2.&SBE1.	236
3	beads_SBE2.&SBE1.	278
3	beads_SBE2.&SBE1.	221
3	beads_SBE2.&SBE1.	269
3	beads_SBE2.&SBE1.	322
3	beads_SBE2.&SBE1.	289
3	beads_SBE2.&SBE1.	211
3	beads_SBE2.&SBE1.	269
3	beads_SBE2.&SBE1.	243
3	beads_SBE2.&SBE1.	283
3	beads_SBE2.&SBE1.	213
3	beads_SBE2.&SBE1.	200
3	beads_SBE2.&SBE1.	268
1	cyto_CTRL	156
1	cyto_CTRL	148
1	cyto_CTRL	134
1	cyto_CTRL	136
1	cyto_CTRL	144
1	cyto_CTRL	132
1	cyto_CTRL	173
1	cyto_CTRL	167
1	cyto_CTRL	150
1	cyto_CTRL	172
1	cyto_CTRL	154
1	cyto_CTRL	105
1	cyto_CTRL	130
1	cyto_CTRL	118
2	cyto_CTRL	70
2	cyto_CTRL	83
2	cyto_CTRL	71
2	cyto_CTRL	90
2	cyto_CTRL	115
2	cyto_CTRL	101
2	cyto_CTRL	125
2	cyto_CTRL	143
2	cyto_CTRL	97
2	cyto_CTRL	114
2	cyto_CTRL	116
2	cyto_CTRL	145
2	cyto_CTRL	102
2	cyto_CTRL	111
2	cyto_CTRL	108
3	cyto_CTRL	147
3	cyto_CTRL	158
3	cyto_CTRL	130
3	cyto_CTRL	142
3	cyto_CTRL	164
3	cyto_CTRL	116
3	cyto_CTRL	155
3	cyto_CTRL	183
3	cyto_CTRL	114
3	cyto_CTRL	174
3	cyto_CTRL	107
3	cyto_CTRL	121
3	cyto_CTRL	72
3	cyto_CTRL	105
3	cyto_CTRL	137
3	cyto_CTRL	100
3	cyto_CTRL	165
3	cyto_CTRL	95
3	cyto_CTRL	157
1	cyto_SBE2.&SBE1.	174
1	cyto_SBE2.&SBE1.	153
1	cyto_SBE2.&SBE1.	153
1	cyto_SBE2.&SBE1.	143
1	cyto_SBE2.&SBE1.	170
1	cyto_SBE2.&SBE1.	171
1	cyto_SBE2.&SBE1.	177
1	cyto_SBE2.&SBE1.	179
1	cyto_SBE2.&SBE1.	163
1	cyto_SBE2.&SBE1.	176
1	cyto_SBE2.&SBE1.	196
1	cyto_SBE2.&SBE1.	169
2	cyto_SBE2.&SBE1.	170
2	cyto_SBE2.&SBE1.	175
2	cyto_SBE2.&SBE1.	172
2	cyto_SBE2.&SBE1.	151
2	cyto_SBE2.&SBE1.	104
2	cyto_SBE2.&SBE1.	176
2	cyto_SBE2.&SBE1.	135
2	cyto_SBE2.&SBE1.	134
2	cyto_SBE2.&SBE1.	115
2	cyto_SBE2.&SBE1.	128
2	cyto_SBE2.&SBE1.	157
2	cyto_SBE2.&SBE1.	160
2	cyto_SBE2.&SBE1.	166
2	cyto_SBE2.&SBE1.	104
2	cyto_SBE2.&SBE1.	173
2	cyto_SBE2.&SBE1.	177
3	cyto_SBE2.&SBE1.	155
3	cyto_SBE2.&SBE1.	134
3	cyto_SBE2.&SBE1.	199
3	cyto_SBE2.&SBE1.	163
3	cyto_SBE2.&SBE1.	187
3	cyto_SBE2.&SBE1.	165
3	cyto_SBE2.&SBE1.	126
3	cyto_SBE2.&SBE1.	112
3	cyto_SBE2.&SBE1.	173
3	cyto_SBE2.&SBE1.	130
3	cyto_SBE2.&SBE1.	141
3	cyto_SBE2.&SBE1.	160
3	cyto_SBE2.&SBE1.	133
3	cyto_SBE2.&SBE1.	148
3	cyto_SBE2.&SBE1.	165
3	cyto_SBE2.&SBE1.	144
3	cyto_SBE2.&SBE1.	147
