# Supplementary material for: Coalescent RNA-localizing and transcriptional activities of SAM68 modulate adhesion and subendothelial basement membrane assembly
Source: eLife journal article supplement (doi:10.7554/elife.85165), 2023-07-26
Supplement: fig5-data1 [file Figure 5 source data 1.xlsx]

## Sheet: summary
	Summary table of fibrillar adhesion analysis
Summary data for the analysis of fibrillar adhesion
Replicate	Condition	avarage number of fibrillar adhesion	average fibrillar adhesion length in µm	maximum lenth µm
1	HU81 CTRL	53.4	17.9758	61.8516
1	HU81 siSAM68	12.8333	14.6627	47.3577
2	HU85 CTRL	85.4667	18.4152	66.3878
2	HU85 siSAM68	58.1818	14.2732	48.8815
3	HU86A CTRL	44.4444	14.6211	56.8821
3	HU86A siSAM68	23.2857	11.4836	40.4219
RAW DATA
Replicate	Condition	number of fibrillar adhesion per cell	average length in µm	maximum lenth µm
1	CTRL	55	22.228	83.633
1	CTRL	74	19.184	59.946
1	CTRL	48	11.12	42.681
1	CTRL	52	14.529	59.844
1	CTRL	38	22.818	63.154
1	siSAM68	33	15.898	47.065
1	siSAM68	32	15.863	55.534
1	siSAM68	23	10.817	29.74
1	siSAM68	17	14.821	56.742
1	siSAM68	32	17.523	50.41
1	siSAM68	11	13.054	44.655
2	CTRL	131	15.753	61.514
2	CTRL	76	12.619	58.407
2	CTRL	138	20.319	65.326
2	CTRL	32	21.9	52.548
2	CTRL	68	15.702	65.572
2	CTRL	52	14.521	64.899
2	CTRL	134	17.582	59.101
2	CTRL	59	22.687	73.254
2	CTRL	38	21.36	81.297
2	CTRL	72	24.868	79.736
2	CTRL	145	15.4	74.427
2	CTRL	97	11.643	64.17
2	CTRL	58	21.915	64.481
2	CTRL	131	16.629	62.333
2	CTRL	51	23.33	68.752
2	siSAM68	50	14.18	48.647
2	siSAM68	20	9.618	26.571
2	siSAM68	84	14.384	61.873
2	siSAM68	13	13.912	36.783
2	siSAM68	50	15.402	55.402
2	siSAM68	32	11.855	37.703
2	siSAM68	83	17.211	56.021
2	siSAM68	50	12.981	53.283
2	siSAM68	55	17.128	58.618
2	siSAM68	99	16.044	53.428
2	siSAM68	104	14.29	49.368
3	CTRL	40	12.656	41.241
3	CTRL	79	14.272	53.13
3	CTRL	34	13.793	58.477
3	CTRL	64	12.966	47.634
3	CTRL	46	17.612	75.3
3	CTRL	24	15.022	51.698
3	CTRL	28	14.305	60.963
3	CTRL	43	16.251	60.979
3	CTRL	42	14.713	62.517
3	siSAM68	28	13.566	64.117
3	siSAM68	30	10.405	38.378
3	siSAM68	14	5.78	27.079
3	siSAM68	26	13.474	43.794
3	siSAM68	24	20.01	40.869
3	siSAM68	32	8.651	38.968
3	siSAM68	9	8.499	29.748
