# Supplementary material for: Coalescent RNA-localizing and transcriptional activities of SAM68 modulate adhesion and subendothelial basement membrane assembly
Source: eLife journal article supplement (doi:10.7554/elife.85165), 2023-07-26
Supplement: fig5-data3 [file Figure 5 source data 3.xlsx]

## Sheet: FN and variants mRNA expression
	Summary of FN mRNA expression after normalization with RPL27a and relative exprission to control
	tFN							FN-EDA							FN-EDB
	Biological replicate 1	Biological replicate 2	Biological replicate 3	Biological replicate 4	Biological replicate 5	Biological replicate 6	Biological replicate 7	Biological replicate 1	Biological replicate 2	Biological replicate 3	Biological replicate 4	Biological replicate 5	Biological replicate 6	Biological replicate 7	Biological replicate 1	Biological replicate 2	Biological replicate 3	Biological replicate 4	Biological replicate 5	Biological replicate 6	Biological replicate 7
si-CTRL	1	1	1	1	1	1	1	1	1	1	1	1	1	1	1	1	1	1	1	1	1
si-SAM68-1	0.915	0.775	0.514	0.961	0.792	0.942	0.738	0.718	0.685	0.492	0.71	0.717	0.77	0.617	0.6104	0.51	0.319	0.4956	0.6232	0.6124	0.4462
si-SAM68-2	0.855	0.688	0.445	0.684	0.597	0.701	0.597	0.632	0.598	0.348	0.556	0.518	0.561	0.574	0.4858	0.452	0.286	0.2821	0.4614	0.4405	0.379
	Ratio of Fibronectin variants expression over total Fibronectin mRNA
	EDA/tFN							EDB/tFN
	Biological replicate 1	Biological replicate 2	Biological replicate 3	Biological replicate 4	Biological replicate 5	Biological replicate 6	Biological replicate 7	Biological replicate 1	Biological replicate 2	Biological replicate 3	Biological replicate 4	Biological replicate 5	Biological replicate 6	Biological replicate 7
CTRL	1	1	1	1	1	1	1	1	1	1	1	1	1	1
siS68-1	0.785	0.884	0.957	0.739	0.905	0.817	0.836	0.6669	0.6583	0.6205	0.6276	0.787	0.6499	0.6045
siS68-2	0.739	0.87	0.782	0.812	0.868	0.801	0.962	0.5678	0.6569	0.6432	0.5016	0.7726	0.6284	0.6345
