# Supplementary material for: Coalescent RNA-localizing and transcriptional activities of SAM68 modulate adhesion and subendothelial basement membrane assembly
Source: eLife journal article supplement (doi:10.7554/elife.85165), 2023-07-26
Supplement: fig5-data4 [file Figure 5 source data 4.xlsx]

## Sheet: Lucyferase activity 
luciferase activity after normalization with internal control (renilla firefly)
amount of DNA (ng)	pcDNA					SAM68
	biological repl.1	biological repl.2	biological repl.3	biological repl.4	biological repl.5	biological repl.1	biological repl.2	biological repl.3	biological repl.4	biological repl.5
0	1	1	1	1	1	1	1	1	1	1
10	1.19036	1.01709	1.00197	0.94	1.11	1.17731	1.11717	1.24702	1.14	1.1
25	0.936257	0.776593	0.944988	0.81	0.88	1.47262	1.26716	1.50434	1.38	1.35
50		0.682705		0.73	0.74	1.29818	1.27535		1.37	1.3
Summary statistics from PRISM SAM68 vs pcDNA
amount of DNA (ng)	P value	Mean of pcDNA	Mean of SAM68	Difference	SE of difference	t ratio	df	q value
0	>0,999999	1	1	0	0.0404	0	29	0.505
10	0.015053	1.052	1.156	-0.1044	0.0404	2.584	29	0.010135
25	<0,000001	0.8696	1.395	-0.5253	0.0404	13	29	<0,000001
50	<0,000001	0.7176	1.311	-0.5933	0.04879	12.16	29	<0,000001
