# Supplementary material for: Coalescent RNA-localizing and transcriptional activities of SAM68 modulate adhesion and subendothelial basement membrane assembly
Source: eLife journal article supplement (doi:10.7554/elife.85165), 2023-07-26
Supplement: fig5-data5 [file Figure 5 source data 5.xlsx]

## Sheet: SAM68-ChIP summary
ΔCt (normalized to the input samples) value for each sample. ΔCt [normalized ChIP] = (Ct [ChIP] - (Ct [Input] - Log2 (Input Dilution Factor). Where Input Dilution Factor = (fraction of the input chromatin saved)-1 × Input dilution factor before q PCR. Here the fraction of Input chromatin saved is 20 μl and the fraction for each IP is 90 μl. The IP fraction is 4.5 times the input fraction. For QPC…
	ChIP-1	ChIP-2	ChIP3	Mean	SD	IgG
ChIP200	14.1783	43	16.1292	24.4358	16.1066
ChIP600	15.0576	17.03	13.3322	15.1399	1.85026	1
ChIP1000	27.4947	31.71	33.5884	30.931	3.12066	1
ChIP1500	22.699	25.07	28.8291	25.5327	3.09111	1
ChIP3000	25.326	28.28	26.4468	26.6843	1.49122	1
18S	3	11.93	4.73	6.55333	4.73599	1
ChIP1
Chip200					Chip600				Chip1000				Chip1500				Chip3000				18S-Biorad
	5.64386	Adj Input(100%)	20.8968		5.64386	Adj Input(100%)	20.4005		5.64386	Adj Input(100%)	21.9014		5.64386	Adj Input(100%)	21.2087		5.64386	Adj Input(100%)	21.3215			5.64386	Adj Input(100%)	20.4862
	Input (1/50)	IgG IP	S68 IP		Input (1/50)	IgG IP	S68 IP		Input (1/50)	IgG IP	S68 IP		Input (1/50)	IgG IP	S68 IP		Input (1/50)	IgG IP	S68 IP			Input (1/50)	IgG IP	S68 IP
	26.9435	32.6538	29.6628		26.0125	32.8624	28.9455		27.3059	35.5363	30.7239		26.76	35.7722	31.1825		27.2408	35.9806	30.8957			26.0466	29.4638	27.7892
	25.9007	33.3012	29.2		25.9245	32.6769	28.8256		27.6205		30.9618		26.8194	35.9638	31.5015		26.9931	35.2917	30.7607		% Input	26.128	29.2739	27.619
	26.7777	33.7535	29.3689		26.1961	32.9065	28.9375		27.7093	35.513	30.5449		26.9781	35.7062	31.2446		26.6623	35.238	30.8662			26.2155	29.3823	27.9597
Moy CT	26.5406	33.2362	29.4106		26.0444	32.8153	28.9029		27.5452	35.5246	30.7435		26.8525	35.8141	31.3095		26.9654	35.5034	30.8409		Moy CT	26.13	29.3733	27.7893
Delta Ct	-5.64386	-12.3394	-8.51378		-5.64386	-12.4148	-8.50237		-5.64386	-13.6232	-8.84214		-5.64386	-14.6054	-10.1009		-5.64386	-14.1819	-9.51934		Delta Ct	-5.64386	-8.88717	-7.30312
% Input		0.0192962	0.273587			0.0183136	0.27576			0.00792503	0.217896			0.00401172	0.0910622			0.00538054	0.136268		% Input		0.211201	0.633203
		1	14.1783			1	15.0576			1	27.4947			1	22.699			1	25.326		Fold Enrichment		1	2.9981
Delta CT		0	-3.82561			0	-3.91242			0	-4.78108			0	-4.50456
Fold enrichment		1	14.1783			1	15.0576			1	27.4947			1	22.699
ChIP2
Chip200					Chip600				Chip1000				Chip1500				Chip3000				18S-Biorad
	5.64386	Adj Input(100%)	22.483		5.64386	Adj Input(100%)	20.535		5.64386	Adj Input(100%)	24.0007		5.64386	Adj Input(100%)	23.3099		5.64386	Adj Input(100%)	22.4621			5.64386	Adj Input(100%)	21.5656
	Input (1/50)	IgG IP	S68 IP		Input (1/50)	IgG IP	S68 IP		Input (1/50)	IgG IP	S68 IP		Input (1/50)	IgG IP	S68 IP		Input (1/50)	IgG IP	S68 IP			Input (1/50)	IgG IP	S68 IP
	28.2075	34.6883	30.717		25.9923	32.2993	28.2937		29.7845	35.9883	32.0814		28.9891	35.5068	30.8805		28.1022	35.9608	30.2512			27.2695	33.1065	29.6544
	28.0104	36.9076	30.8411		26.1818	32.632	28.4188		29.5417	37.396	31.6513		28.9653	35.145	30.9354		28.1179	34.6819	30.0445		% Input	27.1651	33.6489	29.672
	28.1627	36.9741	30.6432		26.3626	32.2751	28.1992		29.6075	36.7577	31.4492		28.9068	35.6566	30.5483		28.0977	34.2728	30.154			27.1938	33.106	29.8066
Moy CT	28.1269	36.19	30.7338		26.1789	32.4021	28.3039		29.6446	36.714	31.7273		28.9538	35.4361	30.788		28.106	34.9718	30.1499		Moy CT	27.2095	33.2871	29.711
Delta Ct	-5.64386	-13.7069	-8.25075		-5.64386	-11.867	-7.76885		-5.64386	-12.7133	-7.72662		-5.64386	-12.1262	-7.47814		-5.64386	-12.5097	-7.6878		Delta Ct	-5.64386	-11.7215	-8.14537
% Input		0.00747822	0.328303			0.0267709	0.458504			0.0148909	0.472123			0.022369	0.560861			0.0171478	0.484999		% Input		0.0296123	0.353183
		1	43.9013			1	17.127			1	31.7056			1	25.0732			1	28.2835		Fold Enrichment		1	11.9269
Delta CT		0	-5.45619			0	-4.0982			0	-4.98666			0	-4.64807
Fold enrichment		1	43.9013			1	17.127			1	31.7056			1	25.0732
ChIP3
Chip200					Chip600				Chip1000				Chip1500				Chip3000				18S-Biorad
	5.64386	Adj Input(100%)	25.6957		5.64386	Adj Input(100%)	23.4835		5.64386	Adj Input(100%)	27.1983		5.64386	Adj Input(100%)	25.7346		5.64386	Adj Input(100%)	24.821			5.64386	Adj Input(100%)	26.5264
	Input (1/50)	IgG IP	S68 IP		Input (1/50)	IgG IP	S68 IP		Input (1/50)	IgG IP	S68 IP		Input (1/50)	IgG IP	S68 IP		Input (1/50)	IgG IP	S68 IP			Input (1/50)	IgG IP	S68 IP
	31.5119	35.6705	32.4768		29.15	34.2373	29.9089		32.76	39.3531	34.1819		30.96	37.8258	32.2568		30.372	36.8298	31.2036			32.2186	34.9435	32.7501
	31.1046	35.0569	33.2001		28.8592	32.9705	29.9661		32.8968	38.904	33.9475		31.1964	37.0926	32.2427		30.8349	36.0202	31.5446		% Input	32.2128	35.2499	32.6317
	31.4023	39.5096	32.5253		29.3729	34.1582	30.2805		32.8695	39.1735	34.0914		31.9791	35.971	31.8415		30.1875	35.2497	31.1764			32.0793	34.6544	32.743
Moy CT	31.3396	36.7456	32.734		29.1274	33.7887	30.0518		32.8421	39.1435	34.0736		31.3785	36.9631	32.1137		30.4648	36.0332	31.3082		Moy CT	32.1703	34.9493	32.7082
Delta Ct	-5.64386	-11.0499	-7.03833		-5.64386	-10.3051	-6.56828		-5.64386	-11.9452	-6.87536		-5.64386	-11.2285	-6.37902		-5.64386	-11.2123	-6.48724		Delta Ct	-5.64386	-8.42289	-6.18184
% Input		0.047167	0.760765			0.0790402	1.05378			0.0253584	0.851749			0.0416766	1.2015			0.0421475	1.11467		% Input		0.291379	1.37747
		1	16.1292			1	13.3322			1	33.5884			1	28.8291			1	26.4468		Fold Enrichment		1	4.7274
Delta CT		0	-4.0116			0	-3.73685			0	-5.06989			0	-4.84945
Fold enrichment		1	16.1292			1	13.3322			1	33.5884			1	28.8291
Summary statistics after multiple pairwise testing and bonferroni correction
	.y.	group1	group2	n1	n2	p	p.signif	p.adj	p.adj.signif
1	Fold_enrichement	IGG-ChiP1000	IGG-ChiP1500	3	3	1	ns	1	ns
2	Fold_enrichement	IGG-ChiP1000	IGG-ChiP3000	3	3	1	ns	1	ns
3	Fold_enrichement	IGG-ChiP1500	IGG-ChiP3000	3	3	1	ns	1	ns
4	Fold_enrichement	IGG-ChiP1000	IGG-ChiP600	3	3	1	ns	1	ns
5	Fold_enrichement	IGG-ChiP1500	IGG-ChiP600	3	3	1	ns	1	ns
6	Fold_enrichement	IGG-ChiP3000	IGG-ChiP600	3	3	1	ns	1	ns
7	Fold_enrichement	IGG-ChiP1000	IGG-S18	3	3	1	ns	1	ns
8	Fold_enrichement	IGG-ChiP1500	IGG-S18	3	3	1	ns	1	ns
9	Fold_enrichement	IGG-ChiP3000	IGG-S18	3	3	1	ns	1	ns
10	Fold_enrichement	IGG-ChiP600	IGG-S18	3	3	1	ns	1	ns
11	Fold_enrichement	IGG-ChiP1000	S68-ChiP1000	3	3	2.8e-13	****	1.26e-11	****
12	Fold_enrichement	IGG-ChiP1500	S68-ChiP1000	3	3	2.8e-13	****	1.26e-11	****
13	Fold_enrichement	IGG-ChiP3000	S68-ChiP1000	3	3	2.8e-13	****	1.26e-11	****
14	Fold_enrichement	IGG-ChiP600	S68-ChiP1000	3	3	2.8e-13	****	1.26e-11	****
15	Fold_enrichement	IGG-S18	S68-ChiP1000	3	3	2.8e-13	****	1.26e-11	****
16	Fold_enrichement	IGG-ChiP1000	S68-ChiP1500	3	3	1.1e-11	****	4.96e-10	****
17	Fold_enrichement	IGG-ChiP1500	S68-ChiP1500	3	3	1.1e-11	****	4.96e-10	****
18	Fold_enrichement	IGG-ChiP3000	S68-ChiP1500	3	3	1.1e-11	****	4.96e-10	****
19	Fold_enrichement	IGG-ChiP600	S68-ChiP1500	3	3	1.1e-11	****	4.96e-10	****
20	Fold_enrichement	IGG-S18	S68-ChiP1500	3	3	1.1e-11	****	4.96e-10	****
21	Fold_enrichement	S68-ChiP1000	S68-ChiP1500	3	3	0.00652	**	0.293	ns
22	Fold_enrichement	IGG-ChiP1000	S68-ChiP3000	3	3	4.77e-12	****	2.14e-10	****
23	Fold_enrichement	IGG-ChiP1500	S68-ChiP3000	3	3	4.77e-12	****	2.14e-10	****
24	Fold_enrichement	IGG-ChiP3000	S68-ChiP3000	3	3	4.77e-12	****	2.14e-10	****
25	Fold_enrichement	IGG-ChiP600	S68-ChiP3000	3	3	4.77e-12	****	2.14e-10	****
26	Fold_enrichement	IGG-S18	S68-ChiP3000	3	3	4.77e-12	****	2.14e-10	****
27	Fold_enrichement	S68-ChiP1000	S68-ChiP3000	3	3	0.0269	*	1	ns
28	Fold_enrichement	S68-ChiP1500	S68-ChiP3000	3	3	0.524	ns	1	ns
29	Fold_enrichement	IGG-ChiP1000	S68-ChiP600	3	3	1.27e-07	****	5.7e-06	****
30	Fold_enrichement	IGG-ChiP1500	S68-ChiP600	3	3	1.27e-07	****	5.7e-06	****
31	Fold_enrichement	IGG-ChiP3000	S68-ChiP600	3	3	1.27e-07	****	5.7e-06	****
32	Fold_enrichement	IGG-ChiP600	S68-ChiP600	3	3	1.27e-07	****	5.7e-06	****
33	Fold_enrichement	IGG-S18	S68-ChiP600	3	3	1.27e-07	****	5.7e-06	****
34	Fold_enrichement	S68-ChiP1000	S68-ChiP600	3	3	2.23e-08	****	1e-06	****
35	Fold_enrichement	S68-ChiP1500	S68-ChiP600	3	3	1.01e-05	****	0.000456	***
36	Fold_enrichement	S68-ChiP3000	S68-ChiP600	3	3	2.48e-06	****	0.000111	***
37	Fold_enrichement	IGG-ChiP1000	S68-S18	3	3	0.00534	**	0.24	ns
38	Fold_enrichement	IGG-ChiP1500	S68-S18	3	3	0.00534	**	0.24	ns
39	Fold_enrichement	IGG-ChiP3000	S68-S18	3	3	0.00534	**	0.24	ns
40	Fold_enrichement	IGG-ChiP600	S68-S18	3	3	0.00534	**	0.24	ns
41	Fold_enrichement	IGG-S18	S68-S18	3	3	0.00534	**	0.24	ns
42	Fold_enrichement	S68-ChiP1000	S68-S18	3	3	1.24e-11	****	5.57e-10	****
43	Fold_enrichement	S68-ChiP1500	S68-S18	3	3	1.04e-09	****	4.66e-08	****
44	Fold_enrichement	S68-ChiP3000	S68-S18	3	3	3.74e-10	****	1.68e-08	****
45	Fold_enrichement	S68-ChiP600	S68-S18	3	3	0.000101	***	0.00456	**
