# Supplementary material for: Coalescent RNA-localizing and transcriptional activities of SAM68 modulate adhesion and subendothelial basement membrane assembly
Source: eLife journal article supplement (doi:10.7554/elife.85165), 2023-07-26
Supplement: fig6-data1 [file Figure 6 source data 1.xlsx]

## Sheet: Basal lamina screen summary
Targets from Marchand et al., 2019
	Biological replicate 1 (ctrl)	Biological replicate 1 (siSAM68-1)	Biological replicate 1 (siSAM68-2)	Biological replicate 2 (ctrl)	Biological replicate 2 (siSAM68-1)	Biological replicate2 (siSAM68-2)	Biological replicate 3 (ctrl)	Biological replicate 3 (siSAM68-1)	Biological replicate 3 (siSAM68-2)	Biological replicate 4 (ctrl)	Biological replicate 4 (siSAM68-1)	Biological replicate 4 (siSAM68-2)	Biological replicate 5 (ctrl)	Biological replicate 5 (siSAM68-1)	Biological replicate 5 (siSAM68-2)	Biological replicate 6 (ctrl)	Biological replicate 6 (siSAM68-1)	Biological replicate 6 (siSAM68-2)
RPL27 (houskeeping gene to normalize)	18.595	17.8122	18.8347	18.4814	18.5266	18.4907	18.7498	18.1709	18.5057	21.451	20.2155	20.2572	19.3101	19.2167	19.5119	19.7253	19.2943	19.4976
	18.5891	17.9686	18.8846	18.7917	18.6531	18.7615	18.6666	18.1218	18.8133	21.4442	20.1332	19.9421	19.9152	19.0014	19.6805	19.5404	19.4128	19.2755
	18.4922	18.1719	18.9487	18.5143	18.5831	18.7796	18.8137	18.0408	18.5712	21.456	19.978	19.9579	19.2152	18.8832	19.1715	19.4549	19.4187	19.2317
RPL27 mean	18.5587	17.9842	18.8894	18.5958	18.5876	18.6772	18.7434	18.1112	18.6301	21.4504	20.1089	20.0524	19.4802	19.0337	19.4546	19.5735	19.3753	19.335
COL8A1	25.2348	25.5881	26.0532	24.9158	26.1254	25.7435	25.4662	26.3017	26.2016	28.0456	27.9618	27.6518	25.5609	26.0781	26.0582	26.247	26.5523	26.3913
	25.1173	25.5624	26.2671	24.8332	25.8126	25.7175	25.2675	25.8725	26.3104	28.1283	27.9565	27.4986	25.6701	25.9741	26.3912	26.027	26.4484	26.263
	25.2164	25.7062	26.245	24.7215	25.7925	25.6281	25.2692	25.974	26.151	28.4002	27.9629	27.3222	25.5255	25.8592	25.9596	26.1162	26.4246	26.3171
Moy	25.1895	25.6189	26.1884	24.8235	25.9102	25.6964	25.3343	26.0494	26.221	28.1914	27.9604	27.4909	25.5855	25.9705	26.1363	26.1301	26.4751	26.3238
ΔCt (x-RPL27)	6.63075	7.63464	7.29904	6.22766	7.32254	7.01912	6.5909	7.93822	7.59094	6.74098	7.85153	7.43848	6.10531	6.93676	6.68172	6.55656	7.09984	6.98888
2^(ΔCtRef-ΔCtech)	1	0.498656	0.629255	1.32234	0.619088	0.763997	1.02801	0.404031	0.513991	0.926441	0.429052	0.571282	1.43938	0.80888	0.965291	1.05277	0.722422	0.780178
	1	0.498656	0.629255	1	0.468176	0.577761	1	0.393021	0.499985	1	0.463119	0.616641	1	0.561966	0.670632	1	0.686211	0.741071
COL4A1	25.3112	25.0327	25.2577	25.2427	25.5334	25.1209	23.7944	23.8661	23.921	27.4583	25.5692	25.6859	25.5244	25.1708	25.3986	25.5284	25.8225	25.9673
	25.2358	24.6024	25.1004	24.9784	25.2027	24.8364	23.7677	23.5107	23.6957	27.1962	25.1081	25.7833	25.3745	24.9298	25.2553	26.0625	25.4649	26.0796
	24.951	24.6018	24.8179	25.0415	25.3128	24.7747	23.3738	23.5502	23.7498	26.9545	25.2607	25.5312	25.5131	24.9823	24.9886	25.4559	25.4473	25.6661
Moy	25.166	24.7456	25.0587	25.0875	25.3496	24.9107	23.6453	23.6423	23.7889	27.203	25.3126	25.6668	25.4707	25.0276	25.2142	25.6823	25.5783	25.9044
ΔCt (x-RPL27)	6.60725	6.76139	6.1693	6.49171	6.76202	6.23343	4.90193	5.53117	5.15879	5.75265	5.20373	5.61442	5.99052	5.99389	5.75956	6.10876	6.20296	6.5694
2^(ΔCtRef-ΔCtech)	1	0.89867	1.35468	1.08338	0.898278	1.29578	3.26101	2.1083	2.72918	1.80826	2.64547	1.99009	1.5334	1.52982	1.79961	1.41273	1.32344	1.02658
	1	0.89867	1.35468	1	0.829145	1.19606	1	0.646517	0.836912	1	1.46299	1.10056	1	0.997661	1.17361	1	0.936793	0.726663
NID1	24.2725	23.2567	23.5121	23.1733	23.1602	23.1628	23.5612	23.5796	23.5515	26.8973	25.3022	24.9728	23.8941	23.6292	23.7055	24.816	25.1991	24.5415
	23.8932	22.8843	23.6174	23.6652	23.1459	23.4013	23.461	23.3694	23.1547	26.569	25.0638	25.3025	23.8712	23.6712	23.7653	25.1852	24.3526	24.9317
	23.3457	22.8539	23.4096	23.6082	23.1857	23.345	22.9905	23.3572	23.6962	26.7866	25.7376	24.8611	23.9631	23.3738	23.5958	25.1728	24.3227	24.6581
Moy	23.8372	22.9983	23.513	23.4822	23.1639	23.303	23.3376	23.4354	23.4674	26.7509	25.3679	25.0455	23.9095	23.5581	23.6889	25.058	24.6248	24.7104
ΔCt (x-RPL27)	5.27842	5.01404	4.62363	4.88641	4.5763	4.6258	4.59418	5.32424	4.83736	5.30056	5.25897	4.99308	4.42928	4.52435	4.23422	5.48447	5.24951	5.37546
2^(ΔCtRef-ΔCtech)	1	1.20112	1.57438	1.31222	1.6269	1.57202	1.60685	0.968738	1.3576	0.984771	1.01357	1.2187	1.80143	1.68655	2.06222	0.866906	1.02024	0.934948
	1	1.20112	1.57438	1	1.23981	1.19798	1	0.60288	0.844881	1	1.02924	1.23755	1	0.936226	1.14477	1	1.17687	1.07849
LOXL3	31.4128	30.5864	34.6366	30.5086	30.9582	31.8718	29.9379	30.638	30.9821	34.1873	33.4307	33.402	32.3311	31.7215	32.1195	32.5866	32.9424	33.25
	31.4293	31.7273	31.7478	30.3354	31.4037	31.491	30.301	30.7032	31.3318	34.1687	34.4802	35.409	31.7669	32.5231	31.8834	Undetermined	34.5843	34.1517
	31.4282	31.7505	31.7845	30.2867	30.9328	31.8429	29.8358	30.6021	30.8197	36.1343	32.483	36.2756	32.0141	Undetermined	33.5125	33.5857	33.298	32.3995
Moy	31.4234	31.3547	32.7229	30.3769	31.0982	31.7352	30.0249	30.6478	31.0445	34.8301	33.4646	35.0289	32.0374	32.1223	32.5051	33.0862	33.6083	33.2671
ΔCt (x-RPL27)	6.23394	5.73584	6.53454	5.55339	5.18809	6.03888	4.69061	4.5984	4.82351	6.63877	5.50417	7.53798	6.45189	6.1518	6.36879	6.95611	7.13313	6.94323
2^(ΔCtRef-ΔCtech)	1	1.41235	0.81191	1.60274	2.06457	1.14477	2.91466	3.10702	2.65816	0.755324	1.65837	0.404989	0.859786	1.05858	0.910764	0.606184	0.536184	0.611621
	1	1.41235	0.81191	1	1.28815	0.714256	1	1.066	0.911998	1	2.19557	0.536179	1	1.23122	1.05929	1	0.884523	1.00897
Emilin1	29.8581	28.6276	28.8237	29.0255	29.5516	29.1868	26.2413	27.0929	27.1756	29.8132	28.8261	30.238	28.4086	28.1375	28.5035	28.721	28.8094	29.0693
	29.1192	28.2103	28.7161	28.4382	28.6956	28.4665	26.047	26.8066	26.6482	30.1579	28.5502	29.3389	28.5987	27.9253	28.0879	29.4092	29.2887	28.822
	28.736	28.3014	28.0552	27.9052	28.8224	27.4962	25.8091	26.5722	26.1108	29.6122	28.4404	28.4494	28.8069	28.1621	28.0903	28.3975	28.6498	28.6374
Moy	29.2378	28.3797	28.5316	28.4563	29.0232	28.3832	26.0325	26.8239	26.6449	29.8611	28.6056	29.3421	28.6047	28.0749	28.2272	28.8425	28.916	28.8429
ΔCt (x-RPL27)	10.679	10.3955	9.64227	9.86045	10.4356	9.70593	7.28909	8.71273	8.01479	8.4107	8.49669	9.2897	9.12456	9.04122	8.7726	9.26903	9.54071	9.50794
2^(ΔCtRef-ΔCtech)	1	1.21718	2.05164	1.76368	1.18382	1.96307	10.4828	3.90769	6.33899	4.81769	4.53893	2.6196	2.93729	3.11197	3.74882	2.65739	2.20127	2.25183
	1	1.21718	2.05164	1	0.671223	1.11305	1	0.372771	0.604703	1	0.942137	0.543745	1	1.05947	1.27629	1	0.828358	0.847385
Perlecan	17.6153	17.2953	17.892	17.6804	17.8967	17.5606	17.1092	17.4524	17.2731	21.6629	19.8108	19.4577	18.3842	18.2697	18.2478	19.0614	18.9518	19.2266
	17.4868	17.4623	18.0724	17.5084	17.6296	17.6149	17.0979	17.3105	17.2659	21.6597	19.8443	19.5097	18.4302	18.2594	18.451	19.3834	19.2264	19.5622
	17.5509	17.4183	17.9062	17.5597	17.6557	19.8351	16.9707	17.4425	17.1375	21.6333	19.7845	19.468	18.3549	18.081	18.3355	19.0642	18.932	19.3585
Moy	17.551	17.392	17.9569	17.5828	17.7274	18.3369	17.0593	17.4018	17.2255	21.652	19.8132	19.4785	18.3898	18.2033	18.3448	19.1696	19.0367	19.3824
ΔCt (x-RPL27)	-1.00776	-0.592269	-0.932505	-1.01299	-0.860252	-0.340352	-1.68413	-0.709348	-1.4046	0.201592	-0.295701	-0.573885	-1.0904	-0.830393	-1.10986	-0.403886	-0.338541	0.0474726
2^(ΔCtRef-ΔCtech)	1	0.749764	0.949174	1.00363	0.902809	0.629637	1.59812	0.813147	1.31662	0.432463	0.610448	0.740271	1.05895	0.884316	1.07333	0.657985	0.628847	0.48122
	1	0.749764	0.949174	1	0.899541	0.627358	1	0.508816	0.823856	1	1.41156	1.71176	1	0.835084	1.01358	1	0.955717	0.731354
hVCAN	31.0996	31.0003	32.0803	34.2264	32.1916	32.9762	32.4944	32.2269	31.7346	Undetermined	37.3805	36.3015	33.543	32.7448	30.0174	31.859	32.399	31.9377
	30.6435	30.9112	31.5451	34.2832	32.7031	32.8232	32.622	32.2486	31.7671	36.9375	34.8963	34.9419	35.2681	32.1731	32.1403	32.5398	32.9196	32.0145
	30.5539	31.201	31.9046	33.628	32.3101	31.6058	32.7108	31.7681	31.2741	Undetermined	34.3793	34.7787	33.2568	32.6186	32.5796	31.6116	32.0641	31.8818
Moy	30.7657	31.0375	31.8433	34.0459	32.4016	32.4684	32.6091	32.0812	31.5919	36.9375	35.5521	35.3407	34.0226	32.5122	31.5791	32.0034	32.4609	31.9447
ΔCt (x-RPL27)	12.2069	13.0533	12.954	15.45	13.814	13.7912	13.8657	13.9701	12.9619	15.4871	15.4432	15.2883	14.5424	13.4784	12.1245	12.4299	13.0856	12.6097
2^(ΔCtRef-ΔCtech)	1	0.55619	0.595822	0.105614	0.328264	0.3335	0.316711	0.294606	0.592572	0.102934	0.106119	0.118142	0.198124	0.414229	1.05881	0.856778	0.54387	0.756395
	1	0.55619	0.595822	1	3.10815	3.15773	1	0.930206	1.87102	1	1.03094	1.14775	1	2.09076	5.34419	1	0.634785	0.882836
LTBP1	22.7549	21.7964	22.3796	22.2849	21.6606	21.6947	22.253	22.2319	22.043	26.9274	24.5383	24.3647	22.6185	22.6965	22.874	23.4826	23.3792	23.2875
	22.7206	21.8936	21.4014	22.339	21.6619	22.0248	22.5538	22.2259	21.9697	26.7495	24.4653	24.7232	22.8809	22.594	22.8035	23.8955	23.3428	23.6194
	22.6072	21.9739	Undetermined	22.179	21.6969	21.6382	22.3288	22.0444	22.2078	26.6075	24.5671	24.2682	22.7463	22.5638	22.673	23.5678	23.2329	23.3083
Moy	22.6942	21.888	21.8905	22.2677	21.6732	21.7859	22.3785	22.1674	22.0735	26.7615	24.5235	24.452	22.7485	22.6181	22.7835	23.6486	23.3183	23.4051
ΔCt (x-RPL27)	4.13549	3.90372	3.00114	3.67184	3.08554	3.10862	3.63511	4.05627	3.44347	5.31108	4.41465	4.39962	3.26837	3.58436	3.32888	4.07512	3.94302	4.0701
2^(ΔCtRef-ΔCtech)	1	1.17428	2.19521	1.37903	2.07047	2.0376	1.41458	1.05645	1.61555	0.442702	0.824071	0.832699	1.82402	1.46524	1.7491	1.04273	1.14272	1.04637
	1	1.17428	2.19521	1	1.50139	1.47756	1	0.746825	1.14207	1	1.86146	1.88095	1	0.8033	0.958924	1	1.09589	1.00348
ADAMTS9	24.5752	24.4688	25.3319	24.7793	24.4467	24.3377	24.4265	24.6081	24.4774	28.9459	27.7014	27.1031	24.9943	25.5223	25.7433	25.4483	26.1482	25.9097
	24.2704	24.3637	25.3336	24.6243	24.4674	24.3988	24.342	24.5683	24.3372	28.6786	27.2586	27.1494	24.9702	25.464	25.6873	25.9424	25.9481	26.2867
	24.1773	24.4536	25.3696	24.5013	24.6408	24.3313	24.3153	24.5358	24.3633	28.7842	27.574	27.0457	25.0956	25.5111	25.4887	25.6132	25.8763	26.1108
Moy	24.341	24.4287	25.3451	24.635	24.5183	24.3559	24.3613	24.5707	24.3926	28.8029	27.5113	27.0994	25.02	25.4992	25.6398	25.6679	25.9909	26.1024
ΔCt (x-RPL27)	5.78223	6.44444	6.45569	6.03914	5.93066	5.67867	5.61788	6.45955	5.76258	7.35251	7.40245	7.04699	5.53986	6.46542	6.18515	6.09443	6.61556	6.76744
2^(ΔCtRef-ΔCtech)	1	0.631912	0.627001	0.836877	0.90223	1.07442	1.12066	0.625325	1.01371	0.336744	0.325287	0.416168	1.18293	0.622788	0.756324	0.805411	0.561231	0.505153
	1	0.631912	0.627001	1	1.07809	1.28385	1	0.557997	0.904569	1	0.965976	1.23586	1	0.526477	0.639363	1	0.696826	0.6272
LAMA1	29.1392	27.6139	24.6137	27.9309	25.8458	29.0114	29.1522	25.8073	29.1456	32.5431	33.2484	30.2906	24.7029	24.7011	31.2102	26.9752	37.1748	29.4097
	29.8064	27.1663	24.8045	27.9364	25.7971	29.4331	28.8667	25.6685	29.284	32.4313	34.8681	31.7515	25.5103	24.5445	31.2621	27.4659	31.4107	29.8228
	28.6055	28.4838	24.4731	27.7063	25.522	29.8271	28.7571	25.8201	28.796	32.4162	33.9251	31.0206	25.7945	24.7508	31.2005	27.2649	30.8226	28.7844
Moy	29.1837	27.7547	24.6304	27.8579	25.7216	29.4239	28.9253	25.7653	29.0752	32.4635	34.0138	31.0209	25.3359	24.6655	31.2243	27.2353	33.1361	29.339
ΔCt (x-RPL27)	10.625	9.77043	5.74107	9.26206	7.13401	10.7466	10.1819	7.65415	10.4451	11.0131	13.9049	10.9685	5.8557	5.63172	11.7697	7.66179	13.7608	10.004
2^(ΔCtRef-ΔCtech)	1	1.80818	29.5256	2.57203	11.243	0.919126	1.35947	7.83978	1.13276	0.764096	0.10295	0.7881	27.2703	31.8506	0.452283	7.79836	0.11377	1.53789
	1	1.80818	29.5256	1	4.37127	0.357355	1	5.7668	0.833239	1	0.134734	1.03141	1	1.16796	0.0165851	1	0.0145889	0.197207
NID2-2		26.3034	26.9784	28.7444	27.2909	27.669	26.8477		26.2935	30.1277	28.0494	28.2809	27.8396	27.1604	27.1866	29.1636	27.8167	28.4609
	26.963		27.0845				27.0083	25.8726	25.9371	29.7616	26.5891	27.9891		26.8061	27.2034	29.7057	27.9996	28.4171
	26.8387	26.1216		28.8557	27.1727	27.1134		25.6698	25.6777	30.5549	27.0217	27.633	27.8133	26.4644	26.9202	29.4512
Moy	26.9008	26.2125	27.0315	28.8	27.2318	27.3912	26.928	25.7712	25.9695	30.1481	27.2201	27.9677	27.8264	26.8103	27.1034	29.4402	27.9082	28.439
ΔCt (x-RPL27)	8.34209	8.2283	8.14213	10.2042	8.64416	8.71396	8.18462	7.66007	7.3394	8.69766	7.11116	7.91528	8.34626	7.77657	7.64879	9.8667	8.53287	9.10406
2^(ΔCtRef-ΔCtech)	1	1.08207	1.14867	0.275069	0.811085	0.772782	1.11533	1.60438	2.00373	0.78156	2.34718	1.34426	0.997116	1.47992	1.61698	0.347574	0.876129	0.589691
	1	1.08207	1.14867	1	2.94865	2.80941	1	1.43849	1.79654	1	3.0032	1.71997	1	1.4842	1.62165	1	2.5207	1.69659
ADAMTS18	22.3023	22.0123	22.9522	22.3528	22.6692	22.7528	21.9734	22.3378	22.7213	26.319	24.8369	24.4634	23.1201	23.3609	23.4372	22.6474	22.7853	22.7511
	21.9581	22.1701	23.2342	22.5385	22.9995	22.9059	22.0475	22.1408	22.2108	26.1586	24.6896	24.6001	23.1847	23.3236	23.4144	22.8843	22.8089	22.9586
	22.0735	22.3235	22.9953	22.501	22.8005	22.7553	21.9037	22.1815	22.1515	26.3825	24.6306	24.484	23.2625	23.243	23.3622	22.5846	22.5596	22.4557
Moy	22.1113	22.1687	23.0606	22.4641	22.823	22.8047	21.9749	22.22	22.3612	26.2867	24.719	24.5158	23.1891	23.3091	23.4046	22.7054	22.7179	22.7218
ΔCt (x-RPL27)	3.55258	4.18442	4.17119	3.86827	4.23543	4.12743	3.23148	4.10888	3.73112	4.83632	4.61014	4.46345	3.70894	4.27542	3.94997	3.1319	3.34264	3.38686
2^(ΔCtRef-ΔCtech)	1	0.645353	0.651296	0.803464	0.622934	0.671355	1.24928	0.680043	0.883594	0.41073	0.480443	0.531862	0.897285	0.605904	0.759231	1.33856	1.15664	1.12172
	1	0.645353	0.651296	1	0.77531	0.835576	1	0.544347	0.707281	1	1.16973	1.29492	1	0.675264	0.846143	1	0.864094	0.838011
Syndecan	25.7131	26.0893	26.7712	26.1446	26.3302	26.1157	25.9847	26.8133	25.9515	31.0992	29.0394	28.761	26.9758	27.3461	27.4178	27.4919	27.8946	27.5908
	25.5423	26.0359	26.7739	25.9506	26.1913	25.9614	25.8757	26.3021	25.8799	30.8749	28.9614	28.7151	26.9834	27.2462	27.3989	27.6894	27.6333	27.6121
	25.8394	25.9634	26.5611	25.8894	26.1545	25.9569	25.6842	26.1666	25.7753	30.7094	28.7527	28.5269	26.9845	27.2749	27.2728	27.3679	27.6231	27.3419
Moy	25.6983	26.0295	26.702	25.9949	26.2253	26.0113	25.8482	26.4273	25.8689	30.8945	28.9178	28.6677	26.9812	27.289	27.3632	27.5164	27.717	27.5149
ΔCt (x-RPL27)	7.13955	8.04527	7.81268	7.39905	7.63769	7.33411	7.10482	8.31615	7.23882	9.4441	8.80895	8.61528	7.50107	8.25532	7.90853	7.9429	8.34172	8.17999
2^(ΔCtRef-ΔCtech)	1	0.533767	0.627146	0.835377	0.70802	0.873843	1.02436	0.442392	0.933505	0.202424	0.314384	0.359551	0.778347	0.461447	0.586834	0.573019	0.434623	0.486179
	1	0.533767	0.627146	1	0.847545	1.04605	1	0.431871	0.911303	1	1.5531	1.77623	1	0.592854	0.753949	1	0.758479	0.848452
Col4A1-Long	28.5286	28.0342	28.1893	28.0083	27.5446	27.761	27.0757	26.9637	27.1528	30.8995	29.5015	28.8392	27.8825	27.5711	27.9726	28.2132	28.016	28.473
	27.485	26.9429	27.6091	27.1177	27.0954	27.4212	26.824	26.5657	27.1677	30.7095	28.9736	28.8856	28.3749	27.4816	27.6089	29.4759	27.984	28.8363
	27.2844	26.9284	27.2747	27.2619	27.3365	26.9355	26.5121	26.6903	26.9649	30.8859	29.0044	28.3809	28.2203	27.2431	28.1823	28.6196	28.3323	28.073
Moy	27.766	27.3018	27.691	27.4626	27.3255	27.3726	26.8039	26.7399	27.0951	30.8316	29.1598	28.7019	28.1592	27.4319	27.9213	28.7696	28.1108	28.4607
ΔCt (x-RPL27)	9.20723	9.3176	8.80167	8.86682	8.73787	8.69531	8.06054	8.62872	8.46505	9.38122	9.05092	8.64951	8.67906	8.39819	8.46663	9.19607	8.73548	9.12579
2^(ΔCtRef-ΔCtech)	1	0.926351	1.32461	1.26612	1.3845	1.42595	2.21406	1.49331	1.6727	0.88639	1.11444	1.47195	1.44211	1.75205	1.67088	1.00777	1.3868	1.05807
	1	0.926351	1.32461	1	1.09349	1.12624	1	0.674467	0.755492	1	1.25728	1.66061	1	1.21493	1.15864	1	1.3761	1.04991
Col4A2-F5102	17.8864	17.6315	18.1828	17.655	18.128	17.5245	18.1508	17.9117	17.3975	34.6263	19.3217	19.1673	18.409	17.9991	18.0341	18.6561	18.6129	18.6193
	17.5062	17.2825	17.9941	18.1329	17.6308	17.7873	17.8742	17.9516	17.2874	38.0504	18.8429	19.3836	18.2198	17.6709	18.2635	19.164	18.64	18.9377
	17.5357	17.6304	17.4063	17.732	17.7119	17.6557	17.8089	17.6374	17.1506	34.4324	19.3567	19.2577	18.2442	18.1606	17.8008	18.7269	18.7914	18.9797
Moy	17.6428	17.5148	17.8611	17.8399	17.8235	17.6558	17.9446	17.8336	17.2785	35.703	19.1738	19.2695	18.291	17.9435	18.0328	18.849	18.6814	18.8456
ΔCt (x-RPL27)	-0.915973	-0.469474	-1.02831	-0.75588	-0.764074	-1.02141	-0.798758	-0.277571	-1.35156	14.2526	-0.9351	-0.782878	-1.1892	-1.09019	-1.42182	-0.724535	-0.693849	-0.489387
2^(ΔCtRef-ΔCtech)	1	0.733821	1.08098	0.894967	0.900065	1.07582	0.921965	0.642424	1.35246	2.71517e-05	1.01335	0.911873	1.20851	1.12836	1.41996	0.875732	0.857302	0.74402
	1	0.733821	1.08098	1	1.0057	1.20208	1	0.696799	1.46694	1	37321.6	33584.3	1	0.933674	1.17496	1	0.978955	0.849598
