# Supplementary material for: Coalescent RNA-localizing and transcriptional activities of SAM68 modulate adhesion and subendothelial basement membrane assembly
Source: eLife journal article supplement (doi:10.7554/elife.85165), 2023-07-26
Supplement: fig6-data2 [file Figure 6 source data 2.xlsx]

## Sheet: ECM staining quantification
Fibronectin						COLIV						Perlecan
Experiment ID	nuclei	FN	ratio	Norm to 1		Experiment ID	nuclei	COLIV	ratio	Norm to 1		Experiment ID	nuclei	Perlecan	ratio	Norm to 1
HU88 CTRL	24036	5557870	231.231	1		HU88 CTRL	24036	1491530	62.054	1		HU95 CTRL	24480	693709	28.3378	1
HU88 siSAM2	28902	2422950	83.8333	0.362552		HU88 siSAM2	28902	775900	26.8459	0.432621		HU95 siSAM2	26397	594982	22.5398	0.795396
HU88 siSAM4	25341	534989	21.1116	0.0913009		HU88 siSAM4	25341	721512	28.4721	0.458828		HU95 siSAM4	22970	565948	24.6386	0.86946
HU90 CTRL	26256	6894780	262.598	1		HU90 CTRL	26256	1791210	68.221	1		HU100-48 CTRL	43866	1654470	37.7165	1
HU90 siSAM2	37697	4305920	114.224	0.434978		HU90 siSAM2	37697	1419630	37.659	0.552014		HU100-48 siSAM2	45481	1136590	24.9904	0.662587
HU90 siSAM4	34699	3638520	104.86	0.399315		HU90 siSAM4	34699	1314080	37.8708	0.55512		HU100-48 siSAM4	40425	1317390	32.5885	0.864039
HU97 CTRL	19450	952776	48.9859	1		HU97 CTRL	19450	104477	5.37157	1		HU101_36 CTRL	34868	7455800	213.829	1
HU97 siSAM2	21648	613901	28.3583	0.578908		HU97 siSAM2	21648	73004.2	3.37233	0.627811		HU101_36 siSAM2	34611	1606350	46.4115	0.21705
HU97 siSAM4	19486	505643	25.949	0.529725		HU97 siSAM4	19486	52739.4	2.70653	0.503862		HU101_36 siSAM4	28560	1829540	64.0595	0.299583
HU100-48 CTRL	43866	4271590	97.3782	1		HU100-48 CTRL	43866	1268050	28.9074	1		HU102 CTRL	33057	6658600	201.428	1
HU100-48 siSAM2	45481	2842520	62.4991	0.641818		HU100-48 siSAM2	45481	930824	20.4662	0.707993		HU102 siSAM2	39235	2107840	53.7235	0.266713
HU100-48 siSAM4	40425	3038800	75.1713	0.771952		HU100-48 siSAM4	40425	862521	21.3363	0.738093		HU102 siSAM4	35870	3773510	105.2	0.522269
HU101_36 CTRL	34868	5516110	158.2	1		HU101_36 CTRL	34868	700508	20.0903	1		HU105 CTRL	49623	4749590	95.7135	1
HU101_36 siSAM2	34611	2010710	58.0945	0.367223		HU101_36 siSAM2	34611	513522	14.837	0.738514		HU105 siSAM2	51000	3430790	67.2704	0.702831
HU101_36 siSAM4	28560	1836340	64.2976	0.406433		HU101_36 siSAM4	28560	354237	12.4033	0.617376		HU105 siSAM4	41845	1720500	41.116	0.429574
HU102 CTRL	33057	5490290	166.086	1		HU102 t2 CTRL	33861	2701860	79.7927	1		HU105bis CTRL	47515	9624590	202.559	1
HU102 siSAM2	39235	2724970	69.4525	0.418173		HU102 t2 siSAM2	41145	2100230	51.0446	0.639715		HU105bis siSAM2	55060	6853890	124.48	0.614539
HU102 siSAM4	35870	3624450	101.044	0.608386		HU102 t2 siSAM4	37021	2400470	64.8408	0.812615		HU105bis siSAM4	53475	3721290	69.5893	0.343551
Old FN staining	Ratio	norm ratio
HU57 CTRL	2.16	1
HU57 siSAM2	0.43	0.199074
HU57 siSAM4	0.58	0.268519
HU62CTRL	1.97	1
HU62 siSAM2	0.54	0.274112
HU62 siSAM4	0.636	0.322843
HU65 CTRL	0.794772	1
HU65 siSAM2	0.158153	0.198992
HU65 siSAM4	0.42227	0.53131
