# Supplementary material for: Coalescent RNA-localizing and transcriptional activities of SAM68 modulate adhesion and subendothelial basement membrane assembly
Source: eLife journal article supplement (doi:10.7554/elife.85165), 2023-07-26
Supplement: fig6-data3 [file Figure 6 source data 3.xlsx]

## Sheet: DE-ADHESION summary
Summary of cell % attached in plate following mild trypsin washes
	Time (min) :	2	4	6	8	10	12	14	16	18	20	22
	CTRL 1	100	100	89.7436	78.2051	52.5641	32.0513	18.5897	9.61538	3.20513	0.641026	1.55431e-14
	CTRL 2	100	100	94.3182	78.9773	57.3864	35.2273	21.0227	10.2273	2.84091	0.568182	1.40998e-14
	CTRL 3	100	100	98.7952	85.5422	64.4578	38.5542	18.0723	9.03614	2.40964	0.60241	8.88178e-15
mean	CTRL	100	100	94.2857	80.9082	58.1361	35.2776	19.2283	9.62627	2.81856	0.603872	1.28416e-14
SD	sd	0	0	4.52588	4.03167	5.9822	3.25176	1.57545	0.595639	0.398216	0.0364439	3.50439e-15
	siSAM68 (1) _1	100	88.3408	46.6368	22.87	8.07175	2.69058	0.44843	-1.11022e-14	-1.11022e-14	-1.11022e-14	-1.11022e-14
	si SAM68 (1)_2	100	98.3051	80.226	19.774	11.2994	5.08475	1.12994	-5.10703e-15	-5.10703e-15	0	0
	siSAM68 (1_3	100	99.4012	82.0359	47.3054	13.7725	4.79042	0.598802	1.86517e-14	0	0	0
mean	siSAM68-1	100	95.349	69.6329	29.9831	11.0479	4.18858	0.725725	8.14164e-16	-5.40309e-15	-3.70074e-15	-3.70074e-15
SD	sd	0	6.09399	19.9358	15.0812	2.85867	1.30563	0.358046	1.5736e-14	5.55703e-15	6.40988e-15	6.40988e-15
	siSAM68 (2)_1	99.061	87.7934	46.4789	18.7793	7.98122	2.8169	0.469484	1.89293e-14	0	0	0
	siSAM68 (2)_2	100	98.8372	81.3953	24.4186	13.9535	6.39535	1.74419	0.581395	-9.99201e-15	0	0
	siSAM68 (2)_3	100	99.2806	84.1727	48.2014	21.5827	4.31655	0.719424	8.54872e-15	0	0	0
mean	siSAM68-2	99.687	95.3037	70.6823	30.4665	14.5058	4.5096	0.977698	0.193798	-3.33067e-15	0	0
SD	sd	0.542113	6.5079	21.0067	15.6156	6.81756	1.79702	0.675459	0.335669	5.76889e-15	0	0
Statistics (t-test in R)
ctrl vs 2		NP	ns	ns	p= 0.0156	p=0.0016	p= 0.0019	p=0.0015	p=0.0013	p= 0.0066	p=0.0012	NP
ctrl vs 4		NP	ns	ns	p=0.0172	p= 0.0001	p= 0.0032	p= 0.0009	p=0.0004	p= 0.0066	p=0.0012	NP
si 2 vs si 4		NP	ns	ns	ns	ns	ns	ns	NP	NP	NP	NP
Raw data
Biological repl.1	CTRL				siSAM68-1				siSAM68-2
Fractions (2min)	Cell count	% detached	cummulative % detached	expressed in % cell attached	Cell count	% detached	cummulative % detached	expressed in % cell attached	Cell count	% detached	cummulative % detached	expressed in % cell attached
2	0	0	0	100	0	0	0		1	0.938967	0.938967	99.061
	0				0			100	1
	0				0				0
4	0	0	0	100	6	11.6592	11.6592		8	11.2676	12.2066	87.7934
	0				9			88.3408	10
	0				11				6
6	6	10.2564	10.2564	89.7436	27	41.704	53.3632		28	41.3146	53.5211	46.4789
	5				36			46.6368	30
	5				30				30
8	6	11.5385	21.7949	78.2051	20	23.7668	77.13		23	27.6995	81.2207	18.7793
	6				16			22.87	22
	6				17				14
10	12	25.641	47.4359	52.5641	13	14.7982	91.9283		5	10.7981	92.0188	7.98122
	15				12			8.07175	7
	13				8				11
12	11	20.5128	67.9487	32.0513	4	5.38117	97.3094		3	5.16432	97.1831	2.8169
	11				3			2.69058	5
	10				5				3
14	8	13.4615	81.4103	18.5897	2	2.24215	99.5516		2	2.34742	99.5305	0.469484
	5				2			0.44843	2
	8				1				1
16	5	8.97436	90.3846	9.61538	1	0.44843	100		0	0.469484	100	1.89293e-14
	6				0			-1.11022e-14	1
	3				0				0
18	4	6.41026	96.7949	3.20513	0	0	100		0	0	100	0
	4				0			-1.11022e-14	0
	2				0				0
20	1	2.5641	99.359	0.641026	0	0	100		0	0	100	0
	1				0			-1.11022e-14	0
	2				0				0
22	1	0.641026	100	1.55431e-14	0	0	100		0	0	100	0
	0				0			-1.11022e-14	0
	0				0				0
total number of counted cells	52				74.3333				71
Biological repl.2	CTRL				siSAM68-1				siSAM68-2
Fractions (2min)	Cell count	% detached	cummulative % detached	expressed in % cell attached	Cell count	% detached	cummulative % detached	expressed in % cell attached	Cell count	% detached	cummulative % detached	expressed in % cell attached
2	0	0	0		0	0	0		0	0	0
	0			100	0			100	0			100
	0				0				0
4	0	0	0		1	1.69492	1.69492		1	1.16279	1.16279
	0			100	2			98.3051	1			98.8372
	0				0				0
6	4	5.68182	5.68182		10	18.0791	19.774		10	17.4419	18.6047
	3			94.3182	10			80.226	8			81.3953
	3				12				12
8	7	15.3409	21.0227		37	60.452	80.226		28	56.9767	75.5814
	10			78.9773	35			19.774	35			24.4186
	10				35				35
10	9	21.5909	42.6136		6	8.47458	88.7006		6	10.4651	86.0465
	12			57.3864	5			11.2994	7			13.9535
	17				4				5
12	12	22.1591	64.7727		3	6.21469	94.9153		4	7.55814	93.6047
	14			35.2273	4			5.08475	4			6.39535
	13				4				5
14	10	14.2045	78.9773		2	3.9548	98.8701		3	4.65116	98.2558
	6			21.0227	2			1.12994	3			1.74419
	9				3				2
16	7	10.7955	89.7727		1	1.12994	100		1	1.16279	99.4186
	5			10.2273	1			-5.10703e-15	1			0.581395
	7				0				0
18	4	7.38636	97.1591		0	0	100		1	0.581395	100
	5			2.84091	0			-5.10703e-15	0			-9.99201e-15
	4				0				0
20	2	2.27273	99.4318		0	0	100		0	0	100
	2			0.568182	0			0	0			0
	0				0				0
22	1	0.568182	100		0	0	100		0	0	100
	0			1.40998e-14	0			0	0			0
	0				0				0
total number of counted cells	58.6667				59				57.3333
Biological repl.3	CTRL				siSAM68-1				siSAM68-2
Fractions (2min)	Cell count	% detached	cummulative % detached	expressed in % cell attached	Cell count	% detached	cummulative % detached	expressed in % cell attached	Cell count	% detached	cummulative % detached	expressed in % cell attached
2	0	0	0		0	0	0		0	0	0
	0			100	0			100	0			100
	0				0				0
4	0	0	0		0	0.598802	0.598802		0	0.719424	0.719424
	0			100	0			99.4012	0			99.2806
	0				1				1
6	1	1.20482	1.20482		9	17.3653	17.9641		5	15.1079	15.8273
	0			98.7952	7			82.0359	9			84.1727
	1				13				7
8	7	13.253	14.4578		18	34.7305	52.6946		18	35.9712	51.7986
	9			85.5422	20			47.3054	17			48.2014
	6				20				15
10	13	21.0843	35.5422		19	33.5329	86.2275		11	26.6187	78.4173
	12			64.4578	18			13.7725	12			21.5827
	10				19				14
12	14	25.9036	61.4458		7	8.98204	95.2096		8	17.2662	95.6835
	17			38.5542	4			4.79042	8			4.31655
	12				4				8
14	12	20.4819	81.9277		2	4.19162	99.4012		2	3.59712	99.2806
	10			18.0723	2			0.598802	1			0.719424
	12				3				2
16	5	9.03614	90.9639		1	0.598802	100		0	0.719424	100
	6			9.03614	0			1.86517e-14	1			8.54872e-15
	4				0				0
18	4	6.62651	97.5904		0	0	100		0	0	100
	5			2.40964	0			0	0			0
	2				0				0
20	1	1.80723	99.3976		0	0	100		0	0	100
	2			0.60241	0			0	0			0
	0				0				0
22	1	0.60241	100		0	0	100		0	0	100
	0			8.88178e-15	0			0	0			0
	0				0				0
total number of counted cells	55.3333				55.6667				46.3333
