# Supplementary material for: Coalescent RNA-localizing and transcriptional activities of SAM68 modulate adhesion and subendothelial basement membrane assembly
Source: eLife journal article supplement (doi:10.7554/elife.85165), 2023-07-26
Supplement: fig7-data1 [file Figure 7 source data 1.xlsx]

## Sheet: Cell tracking indiv. migration
Summary of individual cell tracking
Experiment ID	Track disp.	Mean sp.	Total dist.	Max dist.
HU7CTRL	50.1401	0.394568	184.934	60.1079
HU7siSAM1	82.4044	0.540673	253.432	95.3571
HU7siSAM2	89.051	0.54575	256.649	102.506
HU21CTRL	46.4241	0.448166	210.018	60.8584
HU21siSAM1	60.5986	0.573868	270.266	78.0225
HU21siSAM2	65.9406	0.561273	263.361	82.249
HU28CTRL	46.6425	0.333249	156.665	56.1593
HU28siSAM1	70.8853	0.508154	238.802	81.9254
HU28siSAM2	73.4267	0.505214	237.729	86.3935
Summary individual track dispacement
CTRL				siSAM68-1				siSAM68-2
TRACK_ID	FRAME	POSITION_X	POSITION_Y	TRACK_ID	FRAME	POSITION_X	POSITION_Y	TRACK_ID	FRAME	POSITION_X	POSITION_Y
0	0	1083.55	199.55	0	0	169.65	102.7	0	0	1025.05	0
0	1	1088.1	197.6	0	1	165.75	101.4	0	1	1025.7	0
0	2	1095.9	198.9	0	2	137.15	50.05	0	2	1028.95	12.35
0	3	1096.55	198.9	0	3	131.3	48.75	0	3	1036.1	25.35
0	4	1092.65	203.45	0	4	125.45	49.4	0	4	1043.25	26.65
0	5	1092.65	201.5	0	5	120.9	50.7	0	5	1051.05	29.25
0	6	1077.05	200.2	0	6	118.3	52.65	0	6	1054.95	32.5
0	7	1078.35	202.8	0	7	119.6	52.65	0	7	1057.55	33.8
0	8	1079	202.8	0	8	115.7	59.15	0	8	1063.4	37.7
0	9	1080.3	204.75	0	9	112.45	61.75	0	9	1073.15	42.9
0	10	1078.35	204.1	0	10	107.9	65	0	10	1080.3	50.05
0	11	1079.65	198.9	0	11	106.6	65.65	0	11	1082.25	53.95
0	12	1078.35	195.65	0	12	102.05	70.2	0	12	1082.25	53.95
0	13	1076.4	194.35	0	13	96.2	74.75	0	13	1084.85	53.95
0	14	1079	195	0	14	97.5	74.1	0	14	1082.9	58.5
0	15	1078.35	193.7	0	15	100.75	70.2	0	15	1080.95	63.05
0	16	1075.75	193.05	0	16	102.7	68.25	0	16	1076.4	68.9
0	17	1071.2	182	0	17	103.35	70.2	0	17	1073.8	70.2
0	18	1072.5	182.65	0	18	105.3	70.85	0	18	1071.2	72.15
0	19	1077.05	185.9	0	19	107.25	68.25	0	19	1070.55	78.65
0	20	1080.3	183.95	0	20	107.9	66.95	0	20	1072.5	84.5
0	21	1089.4	178.75	0	21	111.8	63.05	0	21	1071.85	88.4
0	22	1092.65	180.05	0	22	111.8	61.1	0	22	1070.55	93.6
0	23	1092	186.55	0	23	107.25	63.05	0	23	1070.55	100.1
0	24	1092.65	185.9	0	24	92.3	81.9	0	24	1073.15	105.3
0	25	1090.05	186.55	0	25	76.05	100.75	0	25	1071.85	111.8
0	26	1087.45	190.45	0	26	65	113.1	0	26	1064.05	116.35
0	27	1079	198.9	0	27	60.45	119.6	0	27	1058.85	113.75
0	28	1077.7	199.55	0	28	57.85	122.2	0	28	1057.55	115.05
0	29	1077.05	197.6	0	29	55.25	128.7	0	29	1059.5	118.3
0	30	1082.9	196.3	0	30	55.9	128.05	0	30	1056.25	118.95
0	31	1082.9	194.35	0	31	53.3	132.6	0	31	1051.7	118.95
0	32	1082.25	196.95	0	32	51.35	137.8	0	32	1045.85	114.4
0	33	1084.2	202.15	0	33	53.3	137.8	0	33	1041.95	128.05
0	34	1084.2	201.5	0	34	55.9	135.85	0	34	1040.65	109.2
0	35	1077.7	195.65	0	35	63.05	113.1	0	35	1041.95	108.55
0	36	1079	195.65	0	36	65.65	108.55	0	36	1042.6	107.9
0	37	1078.35	195	0	37	61.1	115.7	0	37	1041.95	107.25
0	38	1076.4	200.2	0	38	60.45	120.9	0	38	1044.55	105.3
0	39	1077.7	200.85	0	39	59.8	124.15	0	39	1049.75	105.95
0	40	1082.9	202.15	0	40	60.45	124.8	0	40	1051.7	105.3
0	41	1082.25	198.9	0	41	63.05	128.7	0	41	1051.05	106.6
0	42	1083.55	195.65	0	42	63.05	127.4	0	42	1050.4	109.85
0	43	1093.95	188.5	0	43	61.1	130	0	43	1051.7	111.8
0	44	1097.85	187.85	0	44	59.15	131.95	0	44	1051.05	112.45
0	45	1099.15	185.9	0	45	56.55	134.55	0	45	1050.4	115.7
0	46	1099.15	184.6	0	46	56.55	131.3	0	46	1051.05	121.55
0	47	1101.75	191.75	0	47	56.55	133.9	0	47	1054.3	130
1	0	131.95	216.45	1	0	1502.15	84.5	1	0	107.9	66.95
1	1	125.45	210.6	1	1	1499.55	76.7	1	1	109.85	63.7
1	2	121.55	204.1	1	2	1503.45	76.05	1	2	109.2	62.4
1	3	121.55	199.55	1	3	1506.05	77.35	1	3	111.15	59.15
1	4	123.5	198.25	1	4	1504.1	79.3	1	4	110.5	58.5
1	5	122.2	196.3	1	5	1503.45	81.9	1	5	111.8	57.2
1	6	123.5	197.6	1	6	1502.15	89.05	1	6	110.5	57.85
1	7	119.6	199.55	1	7	1498.25	98.8	1	7	109.2	56.55
1	8	120.25	201.5	1	8	1497.6	113.1	1	8	109.85	55.9
1	9	122.2	205.4	1	9	1504.75	122.2	1	9	109.2	55.25
1	10	124.8	206.05	1	10	1509.3	122.85	1	10	109.85	55.9
1	11	127.4	205.4	1	11	1509.95	118.95	1	11	106.6	55.9
1	12	127.4	202.15	1	12	1508	111.15	1	12	104	57.85
1	13	130	195	1	13	1504.75	100.75	1	13	102.7	59.8
1	14	130	192.4	1	14	1503.45	90.35	1	14	102.7	61.1
1	15	132.6	185.25	1	15	1498.9	87.1	1	15	102.05	63.05
1	16	133.9	182.65	1	16	1496.3	87.75	1	16	102.7	63.05
1	17	139.75	178.1	1	17	1493.7	88.4	1	17	105.3	60.45
1	18	146.25	175.5	1	18	1490.45	93.6	1	18	104	63.7
1	19	147.55	174.85	1	19	1486.55	102.05	1	19	103.35	58.5
1	20	149.5	172.25	1	20	1478.1	114.4	1	20	104	57.2
1	21	152.1	172.25	1	21	1470.3	119.6	1	21	103.35	57.85
1	22	156	174.85	1	22	1461.85	124.15	1	22	102.05	59.8
1	23	157.3	178.75	1	23	1454.05	127.4	1	23	102.05	65
1	24	156	184.6	1	24	1446.25	130.65	1	24	105.95	70.85
1	25	154.05	185.25	1	25	1439.75	126.1	1	25	102.7	72.8
1	26	154.7	185.25	1	26	1448.2	121.55	1	26	96.2	78.65
1	27	152.75	189.15	1	27	1456	118.3	1	27	96.2	83.85
1	28	150.8	191.1	1	28	1459.25	117.65	1	28	87.75	92.95
1	32	160.55	187.85	1	29	1460.55	117.65	1	29	79.95	99.45
1	33	161.2	191.75	1	30	1461.2	120.25	1	30	74.1	105.3
1	34	163.15	191.75	1	31	1461.85	124.8	1	31	70.85	105.3
1	35	161.2	198.9	1	32	1461.85	130	1	32	73.45	100.75
1	36	164.45	192.4	1	33	1461.2	137.8	1	33	76.05	101.4
1	37	169.65	184.6	1	34	1460.55	141.7	1	34	78	102.05
1	38	170.95	182.65	1	35	1458.6	144.95	1	35	79.95	100.1
1	39	170.3	178.75	1	36	1450.15	146.25	1	36	83.85	94.9
1	40	167.05	182	1	37	1446.25	139.75	1	37	89.7	88.4
1	41	162.5	192.4	1	38	1446.25	130	1	38	96.85	82.55
1	42	159.25	191.75	1	39	1450.15	126.1	1	39	101.4	77.35
1	43	159.25	191.1	1	40	1450.15	125.45	1	40	102.05	75.4
1	44	157.95	183.95	1	41	1447.55	126.75	1	41	104.65	74.1
1	45	157.95	177.45	1	42	1443	128.05	1	42	106.6	71.5
1	46	156.65	172.25	1	43	1439.1	128.7	1	43	108.55	68.25
1	47	155.35	169	1	44	1433.9	130	1	44	113.1	63.05
2	0	1299.35	222.3	1	45	1430	132.6	1	45	117.65	57.85
2	1	1305.2	213.2	1	46	1427.4	134.55	1	46	117	57.2
2	2	1300	217.1	1	47	1422.2	133.9	1	47	118.3	54.6
2	3	1303.9	222.3	2	0	1602.9	126.75	2	0	1227.85	65
2	4	1303.25	224.9	2	1	1604.2	124.15	2	1	1229.8	66.95
2	5	1309.75	231.4	2	2	1612	108.55	2	2	1230.45	64.35
2	6	1308.45	237.25	2	3	1615.9	114.4	2	3	1231.75	65
2	7	1313.65	232.7	2	4	1618.5	118.95	2	4	1232.4	63.05
2	8	1311.05	233.35	2	5	1619.15	124.15	2	5	1234.35	68.9
2	9	1309.75	226.85	2	6	1619.8	122.85	2	6	1235.65	72.8
2	10	1311.05	214.5	2	7	1616.55	117	2	7	1236.95	74.75
2	11	1313	207.35	2	8	1612	109.85	2	8	1235	72.8
2	12	1317.55	207.35	2	9	1609.4	103.35	2	9	1231.75	70.2
2	13	1309.75	206.05	2	10	1606.15	95.55	2	10	1230.45	66.95
2	14	1307.15	216.45	2	11	1598.35	84.5	2	11	1231.75	67.6
2	15	1303.9	209.3	2	12	1589.25	68.9	2	12	1232.4	68.25
2	16	1303.9	215.15	2	13	1579.5	56.55	2	13	1233.7	67.6
2	17	1294.8	207.35	2	14	1567.8	49.4	2	14	1231.1	61.75
2	18	1292.2	205.4	2	15	1568.45	50.7	2	15	1227.2	57.2
2	19	1283.75	191.75	2	16	1570.4	53.3	2	16	1229.8	60.45
2	20	1276.6	193.05	2	17	1571.7	53.95	2	17	1230.45	59.8
2	21	1273.35	189.8	2	18	1571.05	55.25	2	18	1229.8	57.2
2	22	1272.05	191.1	2	19	1566.5	55.9	2	19	1228.5	53.3
2	23	1270.1	191.75	2	20	1558.05	51.35	2	20	1227.2	52.65
2	24	1268.8	196.95	2	21	1545.7	46.15	2	21	1224.6	50.7
2	25	1268.15	198.9	2	22	1541.15	46.15	2	22	1223.3	50.7
2	26	1266.2	190.45	2	23	1535.95	45.5	2	23	1222.65	45.5
2	27	1271.4	183.95	2	24	1532.05	46.8	2	24	1225.25	42.9
2	28	1274.65	189.15	2	25	1530.75	43.55	2	25	1228.5	39.65
2	29	1279.85	182	2	26	1532.05	46.15	2	26	1231.75	38.35
2	30	1279.2	177.45	2	27	1530.75	53.95	2	27	1230.45	35.1
2	32	1291.55	161.2	2	28	1524.25	62.4	2	28	1229.15	35.1
2	33	1289.6	158.6	2	29	1518.4	65	2	29	1228.5	35.1
2	34	1290.25	158.6	2	30	1508	66.3	2	30	1225.9	33.8
2	35	1294.15	146.9	2	31	1500.2	65.65	2	31	1228.5	35.1
2	36	1290.9	144.3	2	32	1496.95	62.4	2	32	1229.8	35.1
2	37	1289.6	139.75	2	33	1496.3	62.4	2	33	1233.05	33.8
2	38	1290.25	137.8	2	34	1495	59.15	2	34	1236.95	33.8
2	39	1293.5	135.2	2	35	1491.75	55.25	2	35	1238.9	29.9
2	40	1294.8	134.55	2	36	1487.2	52.65	2	36	1237.6	28.6
2	41	1292.2	133.9	2	37	1483.3	50.05	2	37	1233.05	18.85
2	42	1290.25	133.9	2	38	1481.35	47.45	2	38	1225.25	13
2	43	1290.9	130.65	2	39	1483.3	46.8	2	39	1222	0
2	44	1292.2	132.6	2	40	1488.5	42.25	2	40	1223.95	0
2	45	1292.2	131.95	2	41	1487.85	37.7	2	41	1229.8	0
2	46	1297.4	131.95	2	42	1484.6	38.35	2	42	1232.4	0
2	47	1305.2	153.4	2	43	1480.7	35.1	2	43	1231.75	0
3	0	42.25	280.8	2	44	1474.85	33.15	2	44	1232.4	0
3	1	42.9	277.55	2	45	1468.35	28.6	2	45	1229.15	0
3	2	42.9	277.55	2	46	1461.85	0	2	46	1233.05	0
3	3	44.85	274.3	2	47	1452.75	0	2	47	1240.2	0
3	4	44.85	272.35	3	0	1524.25	144.3	3	0	1605.5	122.85
3	5	44.2	273	3	1	1526.85	142.35	3	1	1606.8	128.7
3	6	44.85	271.7	3	2	1530.1	143.65	3	2	1598.35	126.1
3	7	44.2	267.8	3	3	1533.35	147.55	3	3	1595.1	122.2
3	8	44.2	269.1	3	4	1535.95	150.8	3	4	1594.45	115.7
3	9	44.2	267.8	3	5	1534.65	152.75	3	5	1596.4	112.45
3	10	43.55	268.45	3	6	1531.4	162.5	3	6	1595.1	111.15
3	11	42.25	269.75	3	7	1532.7	169	3	7	1595.1	105.95
3	12	42.25	271.05	3	8	1534.65	172.25	3	8	1592.5	102.05
3	13	42.25	269.75	3	9	1535.3	174.85	3	9	1591.85	103.35
3	14	42.9	269.75	3	10	1533.35	174.85	3	10	1591.85	106.6
3	15	44.2	269.75	3	11	1532.7	176.15	3	11	1593.15	109.85
3	16	44.2	271.05	3	12	1530.75	176.8	3	12	1593.8	113.1
3	17	44.2	267.8	3	13	1529.45	172.25	3	13	1595.1	117
3	18	44.2	267.8	3	14	1528.15	169.65	3	14	1595.75	118.95
3	19	44.2	267.15	3	15	1528.15	167.05	3	15	1597.7	121.55
3	20	42.25	266.5	3	16	1528.8	166.4	3	16	1596.4	120.25
3	21	42.25	266.5	3	17	1529.45	167.05	3	17	1595.75	118.3
3	22	42.25	265.85	3	18	1528.15	168.35	3	18	1590.55	114.4
3	23	41.6	267.8	3	19	1530.1	170.3	3	19	1588.6	112.45
3	24	41.6	264.55	3	20	1530.75	170.3	3	20	1584.7	111.15
3	25	41.6	264.55	3	21	1532.7	167.05	3	21	1582.1	109.2
3	26	42.25	263.9	3	22	1534	163.8	3	22	1582.1	109.2
3	27	42.9	266.5	3	23	1534.65	161.85	3	23	1580.15	109.2
3	28	42.25	267.15	3	24	1534.65	160.55	3	24	1579.5	109.85
3	29	42.25	267.15	3	25	1535.3	160.55	3	25	1579.5	109.85
3	30	42.25	267.8	3	26	1536.6	162.5	3	26	1579.5	112.45
3	31	44.2	269.1	3	27	1537.25	165.1	3	27	1583.4	117
3	32	45.5	269.1	3	28	1537.9	169	3	28	1586	118.95
3	33	46.8	268.45	3	29	1537.9	172.9	3	29	1589.9	118.95
3	34	48.75	267.15	3	30	1539.2	175.5	3	30	1593.8	118.3
3	35	50.05	269.1	3	31	1541.8	175.5	3	31	1595.75	118.95
3	36	48.75	267.8	3	32	1544.4	176.8	3	32	1595.75	120.25
3	37	49.4	267.15	3	33	1548.3	178.1	3	33	1599	120.25
3	38	51.35	263.9	3	34	1551.55	179.4	3	34	1606.15	115.05
3	39	51.35	263.25	3	35	1554.15	180.05	3	35	1608.1	111.8
3	40	49.4	263.25	3	36	1556.1	183.95	3	36	1613.95	118.95
3	41	49.4	263.9	3	37	1556.75	183.3	3	37	1615.25	122.2
3	42	49.4	265.85	3	38	1557.4	183.95	3	38	1615.9	121.55
3	43	48.75	267.15	3	39	1560.65	183.3	3	39	1614.6	119.6
3	44	47.45	269.1	3	40	1561.95	180.05	3	40	1612	113.1
3	45	48.1	269.75	3	41	1563.9	177.45	3	41	1608.75	111.15
3	46	47.45	271.05	3	42	1565.85	176.8	3	42	1606.15	109.85
3	47	48.1	269.75	3	43	1569.1	176.15	3	43	1602.25	105.95
4	0	1453.4	283.4	3	44	1569.1	174.2	3	44	1597.7	100.75
4	1	1452.1	282.1	3	45	1569.75	172.9	3	45	1590.55	95.55
4	2	1453.4	287.3	3	46	1576.25	172.9	3	46	1581.45	91
4	3	1450.8	287.95	3	47	1580.15	170.3	3	47	1577.55	93.6
4	4	1449.5	288.6	4	0	246.35	165.1	4	0	935.35	134.55
4	5	1448.85	289.25	4	1	246.35	170.3	4	1	932.75	138.45
4	6	1452.1	289.25	4	2	244.4	173.55	4	2	931.45	140.4
4	7	1452.1	258.7	4	3	241.8	174.85	4	3	931.45	143.65
4	8	1452.1	259.35	4	4	237.9	176.8	4	4	928.85	147.55
4	9	1451.45	260	4	5	236.6	176.15	4	5	934.7	148.2
4	10	1454.05	258.7	4	6	238.55	177.45	4	6	935.35	150.8
4	11	1453.4	256.75	4	7	237.9	177.45	4	7	935.35	156
4	12	1452.1	255.45	4	8	235.3	176.8	4	8	935.35	163.8
4	13	1452.1	256.1	4	9	234.65	176.8	4	9	938.6	170.3
4	14	1449.5	252.85	4	10	234	176.8	4	10	938.6	182.65
4	15	1452.75	250.25	4	11	233.35	178.75	4	11	937.95	189.8
4	16	1445.6	248.3	4	12	234.65	178.75	4	12	934.7	196.95
4	17	1438.45	245.05	4	13	236.6	175.5	4	13	935.35	198.25
4	18	1438.45	243.75	4	14	239.85	172.9	4	14	927.55	198.9
4	19	1438.45	245.7	4	15	241.15	170.3	4	15	917.8	195
4	20	1443	252.2	4	16	243.1	166.4	4	16	887.25	195.65
4	21	1445.6	252.2	4	17	242.45	163.15	4	17	896.35	185.9
4	22	1447.55	252.2	4	18	241.8	161.85	4	18	890.5	185.9
4	23	1448.85	249.6	4	19	241.15	162.5	4	19	885.95	186.55
4	24	1448.2	247	4	20	242.45	160.55	4	20	881.4	183.3
4	25	1446.25	247.65	4	21	243.1	160.55	4	21	883.35	183.3
4	26	1448.2	249.6	4	22	244.4	162.5	4	22	882.05	183.95
4	27	1448.85	250.25	4	23	245.7	162.5	4	23	879.45	180.05
4	28	1450.15	252.85	4	24	247.65	161.2	4	24	881.4	176.15
4	29	1452.1	254.8	4	25	253.5	156.65	4	25	882.7	176.15
4	30	1454.7	256.1	4	26	258.05	155.35	4	26	883.35	174.2
4	31	1459.25	257.4	4	27	261.95	152.75	4	27	889.2	174.2
4	32	1463.8	261.95	4	28	261.95	152.75	4	28	893.1	173.55
4	33	1463.8	265.85	4	29	265.2	148.2	4	29	891.15	170.95
4	34	1458.6	265.85	4	30	268.45	145.6	4	30	891.8	175.5
4	35	1455.35	266.5	4	31	268.45	144.3	4	31	887.25	179.4
4	36	1452.1	265.85	4	32	270.4	143.65	4	32	887.9	198.9
4	37	1452.75	262.6	4	33	273	142.35	4	33	884.65	221
4	38	1454.05	260.65	4	34	272.35	141.05	4	34	876.85	230.75
4	39	1454.05	261.3	4	35	271.05	136.5	4	35	866.45	231.4
4	40	1454.7	259.35	4	36	269.1	131.95	4	36	852.8	231.4
4	41	1451.45	255.45	4	37	269.75	129.35	4	37	840.45	223.6
4	42	1449.5	252.2	4	38	270.4	130	4	38	839.15	221.65
4	43	1448.85	248.3	4	39	274.95	128.05	4	39	835.9	225.55
4	44	1446.9	243.1	4	40	280.15	127.4	4	40	826.8	237.25
4	45	1445.6	243.1	4	41	284.05	126.75	4	41	821.6	247.65
4	46	1440.4	241.15	4	42	291.2	127.4	4	42	820.3	250.9
4	47	1437.15	240.5	4	43	293.8	128.05	4	43	819.65	251.55
5	0	295.75	306.15	4	44	293.15	128.7	4	44	810.55	247
5	1	295.1	304.2	4	45	289.9	129.35	4	45	804.7	243.1
5	2	293.8	305.5	4	46	284.7	128.05	4	46	793	237.9
5	3	292.5	306.15	4	47	280.8	129.35	4	47	785.2	236.6
5	4	291.2	306.8	5	0	1617.2	181.35	5	0	1002.3	143.65
5	5	287.95	308.1	5	1	1621.1	181.35	5	1	999.7	141.05
5	6	287.3	307.45	5	2	1623.7	185.25	5	2	999.05	136.5
5	7	284.7	305.5	5	3	1621.1	191.1	5	3	993.85	133.9
5	8	284.7	305.5	5	4	1615.25	193.05	5	4	984.75	130.65
5	9	284.7	303.55	5	5	1611.35	190.45	5	5	974.35	126.1
5	10	285.35	302.9	5	6	1608.75	193.05	5	6	972.4	119.6
5	11	284.7	302.9	5	7	1605.5	195	5	7	969.8	112.45
5	12	283.4	304.85	5	8	1604.2	200.85	5	8	964.6	110.5
5	13	281.45	311.35	5	9	1602.25	204.1	5	9	960.05	107.9
5	14	280.8	316.55	5	10	1597.05	209.3	5	10	960.05	111.15
5	15	280.15	318.5	5	11	1593.8	211.9	5	11	960.05	112.45
5	16	279.5	320.45	5	12	1589.9	208	5	12	959.4	113.1
5	17	278.85	319.8	5	13	1584.05	202.8	5	13	958.1	115.7
5	18	279.5	321.75	5	14	1582.75	208	5	14	956.8	122.85
5	19	279.5	323.05	5	15	1585.35	209.95	5	15	958.1	128.7
5	20	280.8	325	5	16	1587.95	215.8	5	16	956.8	139.75
5	21	280.15	325	5	17	1591.85	216.45	5	17	959.4	149.5
5	22	280.15	322.4	5	18	1593.8	215.8	5	18	962.65	166.4
5	23	280.15	321.75	5	19	1598.35	217.1	5	19	964.6	175.5
5	24	278.85	319.8	5	20	1600.95	214.5	5	20	963.95	176.8
5	25	278.2	321.1	5	21	1602.25	217.1	5	21	966.55	178.1
5	26	276.25	320.45	5	22	1603.55	215.15	5	22	967.85	180.7
5	27	274.95	319.8	5	23	1605.5	217.1	5	23	970.45	183.3
5	28	273.65	319.8	5	24	1608.1	222.95	5	24	973.7	186.55
5	29	272.35	319.8	5	25	1609.4	237.25	5	25	976.95	190.45
5	30	269.75	319.8	5	26	1613.95	247	5	26	984.1	197.6
5	31	269.75	322.4	5	27	1614.6	254.8	5	27	991.9	198.9
5	32	268.45	322.4	5	28	1614.6	263.9	5	28	996.45	198.25
5	33	268.45	325.65	5	29	1613.95	268.45	5	29	995.15	196.95
5	34	269.1	327.6	5	30	1615.9	276.25	5	30	996.45	194.35
5	35	269.75	328.25	5	31	1618.5	294.45	5	31	1002.95	181.35
5	36	269.75	328.25	5	32	1619.15	297.05	5	32	1002.95	159.9
5	37	271.05	326.3	5	33	1616.55	295.75	5	34	1002.95	159.9
5	38	278.2	333.45	5	34	1614.6	295.1	5	35	1004.25	151.45
5	39	285.35	337.35	5	35	1613.3	291.2	5	36	1002.3	150.8
5	40	292.5	343.2	5	36	1613.95	286	5	37	1001.65	147.55
5	41	297.05	337.35	5	37	1615.25	286	5	38	1000.35	144.95
5	42	298.35	332.15	5	38	1619.15	282.75	5	39	1001	141.05
5	43	300.95	329.55	5	39	1623.7	278.2	5	40	999.7	139.75
5	44	302.25	326.95	5	40	1625.65	278.85	5	41	999.7	133.9
5	45	302.9	333.45	5	41	1628.9	279.5	5	42	997.1	130
5	46	299.65	351.65	5	42	1630.85	282.1	5	43	986.05	119.6
5	47	297.05	349.7	5	43	1632.8	278.85	5	44	973.05	109.85
6	0	1048.45	310.05	5	44	1630.85	280.8	5	45	967.2	102.7
6	1	1048.45	316.55	5	45	1630.2	295.75	5	46	965.9	100.1
6	2	1051.7	312.65	5	46	1630.2	297.7	5	47	967.85	97.5
6	3	1049.75	314.6	5	47	1630.2	294.45	6	0	1108.9	149.5
6	4	1048.45	319.15	6	0	432.9	225.55	6	1	1103.05	149.5
6	5	1047.8	323.05	6	1	431.6	225.55	6	2	1101.1	150.8
6	6	1046.5	326.95	6	2	430.95	225.55	6	3	1099.15	156.65
6	7	1045.2	323.7	6	3	429.65	224.25	6	4	1098.5	159.25
6	8	1042.6	323.7	6	4	427.7	224.9	6	5	1098.5	158.6
6	9	1046.5	319.8	6	5	426.4	224.9	6	6	1098.5	157.95
6	10	1049.1	321.1	6	6	425.75	224.25	6	7	1097.2	157.95
6	11	1051.05	322.4	6	7	427.7	222.95	6	8	1093.95	157.95
6	12	1049.1	325	6	8	433.55	219.7	6	9	1090.7	152.1
6	13	1046.5	326.3	6	9	443.3	217.1	6	10	1090.7	156.65
6	14	1043.25	328.9	6	10	447.2	217.75	6	11	1090.7	159.9
6	15	1040	332.15	6	13	459.55	217.1	6	12	1090.7	148.85
6	16	1038.05	333.45	6	14	457.6	219.7	6	13	1093.3	149.5
6	17	1039.35	329.55	6	15	457.6	220.35	6	14	1095.25	150.15
6	18	1038.7	312.65	6	16	456.95	221.65	6	15	1099.15	151.45
6	19	1038.05	315.9	6	17	453.7	223.6	6	16	1089.4	155.35
6	20	1038.05	302.25	6	18	451.75	224.25	6	17	1090.05	157.3
6	21	1037.4	305.5	6	19	451.1	226.2	6	18	1084.2	164.45
6	22	1039.35	309.4	6	20	451.1	228.8	6	19	1075.1	172.9
6	23	1038.05	308.75	6	21	450.45	229.45	6	20	1071.85	182
6	24	1038.05	314.6	6	22	449.15	229.45	6	21	1067.3	190.45
6	25	1038.05	317.85	6	23	449.8	230.75	6	22	1060.8	200.85
6	26	1037.4	318.5	6	24	450.45	232.05	6	23	1058.85	208
6	27	1038.7	322.4	6	25	449.15	230.1	6	24	1056.9	211.25
6	28	1036.1	327.6	6	26	449.8	226.85	6	25	1059.5	209.3
6	29	1036.1	319.8	6	27	450.45	221.65	6	26	1066	206.7
6	30	1033.5	313.3	6	28	450.45	220.35	6	27	1071.85	201.5
6	31	1038.05	304.2	6	29	451.75	218.4	6	28	1077.7	194.35
6	32	1037.4	302.25	6	30	452.4	215.8	6	29	1077.05	181.35
6	33	1037.4	293.8	6	31	453.05	214.5	6	30	1075.75	183.95
6	34	1039.35	287.3	6	32	451.75	218.4	6	31	1074.45	184.6
6	35	1038.7	286.65	6	33	451.75	219.05	6	32	1074.45	186.55
6	36	1041.95	289.25	6	34	451.75	216.45	6	33	1078.35	192.4
6	37	1043.25	291.85	6	35	452.4	214.5	6	34	1075.1	192.4
6	38	1041.95	304.85	6	36	451.75	219.05	6	35	1074.45	195.65
6	39	1041.95	308.1	6	37	452.4	220.35	6	36	1076.4	202.15
6	40	1045.85	306.8	6	38	451.75	222.3	6	37	1076.4	209.3
6	41	1044.55	302.25	6	39	451.1	222.95	6	38	1071.85	214.5
6	42	1033.5	298.35	6	40	451.1	224.9	6	39	1064.05	214.5
6	43	1027.65	300.3	6	41	451.1	227.5	6	40	1049.75	208.65
6	44	1034.8	300.95	6	42	450.45	228.15	6	41	1038.05	206.05
6	45	1028.95	305.5	6	43	449.8	226.2	6	42	1026.35	200.85
6	46	1029.6	306.15	6	44	449.15	224.9	6	43	1023.1	198.25
6	47	1032.2	309.4	6	45	449.15	225.55	6	44	1020.5	193.05
7	0	1606.15	378.95	6	46	449.8	224.9	6	45	1017.25	186.55
7	1	1604.2	380.25	6	47	450.45	224.9	6	46	986.05	178.75
7	2	1602.9	384.15	7	0	1561.95	239.2	6	47	1002.95	174.85
7	3	1601.6	386.75	7	1	1561.95	241.8	7	0	1184.3	154.05
7	4	1600.95	389.35	7	2	1561.3	245.05	7	1	1182.35	156.65
7	5	1599.65	393.9	7	3	1560	248.95	7	2	1179.75	160.55
7	6	1600.3	399.75	7	4	1554.8	254.8	7	3	1176.5	164.45
7	7	1599.65	403.65	7	5	1552.2	260	7	4	1178.45	165.75
7	8	1601.6	405.6	7	6	1548.3	264.55	7	5	1180.4	177.45
7	9	1601.6	407.55	7	7	1545.05	265.85	7	6	1184.95	189.8
7	10	1601.6	410.8	7	8	1541.8	267.8	7	7	1197.3	193.05
7	11	1601.6	412.1	7	9	1537.9	268.45	7	8	1217.45	182.65
7	12	1603.55	413.4	7	10	1530.75	268.45	7	9	1225.25	171.6
7	13	1593.8	420.55	7	11	1525.55	267.15	7	10	1223.3	169
7	14	1593.15	419.25	7	12	1522.3	265.85	7	11	1210.95	164.45
7	15	1591.85	421.2	7	13	1519.05	261.3	7	12	1194.05	169
7	16	1589.25	420.55	7	14	1518.4	260	7	13	1186.25	169
7	17	1590.55	420.55	7	15	1515.8	258.05	7	14	1181.05	175.5
7	18	1589.25	419.9	7	16	1518.4	258.05	7	15	1177.8	180.7
7	19	1591.2	419.9	7	17	1521.65	259.35	7	16	1178.45	184.6
7	20	1591.2	419.25	7	18	1522.95	263.25	7	17	1179.1	187.2
7	21	1589.9	418.6	7	19	1522.95	264.55	7	18	1182.35	186.55
7	22	1587.95	419.25	7	20	1521	263.25	7	19	1178.45	185.25
7	23	1580.15	420.55	7	21	1519.7	261.3	7	20	1181.05	181.35
7	24	1578.2	421.2	7	22	1519.7	260.65	7	21	1178.45	177.45
7	25	1573.65	421.2	7	23	1518.4	260.65	7	22	1175.85	173.55
7	26	1572.35	419.9	7	24	1514.5	260	7	23	1181.7	170.95
7	27	1574.3	416	7	25	1513.85	258.7	7	24	1193.4	160.55
7	28	1574.95	414.05	7	26	1513.2	258.7	7	25	1192.1	156
7	29	1577.55	412.75	7	27	1513.85	257.4	7	26	1188.85	154.05
7	30	1580.15	413.4	7	28	1512.55	258.05	7	27	1184.95	151.45
7	31	1580.15	411.45	7	29	1509.95	258.05	7	28	1184.3	149.5
7	32	1580.15	411.45	7	30	1505.4	254.8	7	29	1184.3	147.55
7	33	1585.35	412.1	7	31	1500.85	248.95	7	30	1184.3	154.05
7	34	1585.35	413.4	7	32	1491.75	248.95	7	31	1190.15	163.8
7	35	1589.9	414.05	7	33	1489.8	244.4	7	32	1186.9	171.6
7	36	1596.4	409.5	7	34	1488.5	239.85	7	33	1186.25	176.8
7	37	1599.65	405.6	7	35	1490.45	237.25	7	34	1183	180.05
7	38	1597.05	404.3	7	36	1494.35	233.35	7	35	1176.5	185.9
7	39	1598.35	402.35	7	37	1496.3	223.6	7	36	1173.9	191.75
7	40	1599	403	7	38	1494.35	219.7	7	37	1179.75	197.6
7	41	1598.35	403.65	7	39	1502.8	220.35	7	38	1184.95	200.85
7	42	1597.7	406.9	7	40	1510.6	224.9	7	39	1190.15	192.4
7	43	1596.4	411.45	7	41	1511.25	221.65	7	40	1188.2	183.3
7	44	1591.2	419.9	7	42	1508.65	213.85	7	41	1184.3	183.3
7	45	1584.7	429.65	7	43	1509.3	214.5	7	42	1181.7	186.55
7	46	1584.05	436.8	7	44	1511.25	213.85	7	43	1178.45	191.1
7	47	1585.35	438.75	7	45	1513.2	213.2	7	44	1176.5	196.95
8	0	676.65	386.75	7	46	1517.1	210.6	7	45	1173.25	200.2
8	1	677.3	387.4	7	47	1515.8	205.4	7	46	1169.35	215.15
8	2	677.3	388.05	8	0	567.45	244.4	7	47	1170	223.6
8	3	680.55	390	8	1	557.7	258.05	8	0	196.95	168.35
8	4	683.8	391.3	8	2	544.7	263.9	8	1	201.5	170.95
8	5	684.45	391.95	8	3	542.75	268.45	8	2	201.5	170.95
8	6	686.4	391.95	8	4	540.8	271.05	8	3	200.2	171.6
8	7	686.4	392.6	8	5	542.1	272.35	8	4	200.85	172.25
8	8	687.05	393.9	8	6	538.85	274.3	8	5	199.55	171.6
8	9	684.45	391.95	8	7	536.9	272.35	8	6	198.9	174.2
8	10	679.9	387.4	8	8	531.05	278.2	8	7	197.6	176.15
8	11	676	377.65	8	9	532.35	281.45	8	8	194.35	176.8
8	12	676	375.05	8	10	530.4	284.05	8	9	191.75	175.5
8	13	672.75	343.2	8	11	525.2	290.55	8	10	187.2	176.8
8	14	674.7	357.5	8	12	512.2	316.55	8	11	183.95	173.55
8	15	676	361.4	8	13	507	317.2	8	12	183.3	171.6
8	16	673.4	362.05	8	14	500.5	314.6	8	13	185.25	170.3
8	17	672.1	373.1	8	15	494.65	313.3	8	14	189.15	167.05
8	18	677.3	382.85	8	16	495.3	314.6	8	15	191.1	165.75
8	19	676.65	385.45	8	17	495.95	321.1	8	16	191.75	163.8
8	20	675.35	387.4	8	18	496.6	326.95	8	17	194.35	159.9
8	21	678.6	394.55	8	19	494	326.3	8	18	193.7	154.05
8	22	679.25	395.2	8	20	493.35	324.35	8	19	194.35	148.85
8	23	681.85	403	8	21	497.9	317.2	8	20	194.35	146.9
8	24	685.75	406.25	8	22	492.7	320.45	8	21	194.35	147.55
8	25	690.3	407.55	8	23	497.25	318.5	8	22	193.05	148.85
8	26	693.55	405.6	8	24	495.95	321.1	8	23	192.4	150.15
8	27	694.2	402.35	8	25	492.05	321.1	8	24	191.75	150.8
8	28	692.25	401.05	8	26	490.1	325	8	25	191.75	149.5
8	29	687.7	411.45	8	27	490.1	326.95	8	26	193.05	148.2
8	30	688.35	415.35	8	28	489.45	328.25	8	27	193.7	146.9
8	31	689.65	416	8	29	493.35	328.25	8	28	195.65	146.25
8	32	690.95	415.35	8	30	493.35	331.5	8	29	195.65	148.2
8	33	692.25	414.7	8	31	488.15	333.45	8	30	195	151.45
8	34	692.9	414.7	8	32	488.15	334.1	8	31	191.75	155.35
8	35	694.2	414.05	8	33	497.25	330.2	8	32	191.1	154.7
8	36	695.5	414.05	8	34	511.55	314.6	8	33	188.5	152.1
8	37	696.8	412.1	8	35	517.4	313.95	8	34	184.6	147.55
8	38	698.75	412.1	8	36	514.15	316.55	8	35	183.3	143
8	39	700.05	409.5	8	37	514.8	322.4	8	36	183.95	142.35
8	40	699.4	409.5	8	38	511.55	326.95	8	37	183.3	142.35
8	41	700.05	409.5	8	39	505.05	339.3	8	38	183.95	139.1
8	42	700.05	409.5	8	40	498.55	347.75	8	39	185.9	135.85
8	43	702	409.5	8	41	488.8	362.7	8	40	185.9	131.3
8	44	702.65	410.15	8	42	489.45	365.95	8	41	186.55	127.4
8	45	705.9	413.4	8	43	489.45	371.15	8	42	188.5	122.85
8	46	705.9	414.7	8	44	488.8	369.85	8	43	191.75	118.95
8	47	709.8	421.85	8	45	488.8	370.5	8	44	192.4	117.65
9	0	938.6	417.95	8	46	487.5	373.75	8	45	193.7	111.15
9	1	939.9	416	8	47	482.3	375.05	8	46	194.35	105.95
9	2	943.15	408.2	9	0	1260.35	295.75	8	47	191.75	104
9	3	945.1	399.75	9	1	1259.05	293.8	9	0	876.2	204.1
9	4	947.05	395.85	9	2	1253.85	287.3	9	1	874.9	208
9	5	949.65	393.25	9	3	1253.85	284.05	9	2	877.5	207.35
9	6	951.6	392.6	9	4	1254.5	281.45	9	3	878.15	208
9	7	952.9	388.7	9	5	1254.5	278.2	9	4	882.05	207.35
9	8	952.9	388.05	9	6	1251.25	282.1	9	5	887.9	206.7
9	9	954.2	386.75	9	7	1252.55	279.5	9	6	893.1	212.55
9	10	954.85	384.8	9	8	1248.65	281.45	9	7	898.3	218.4
9	11	956.15	385.45	9	9	1249.3	278.85	9	8	902.85	228.15
9	12	954.85	387.4	9	10	1246.05	276.25	9	9	904.8	229.45
9	13	952.9	388.05	9	11	1243.45	272.35	9	10	906.75	230.1
9	14	952.25	386.1	9	12	1237.6	273.65	9	11	910.65	234
9	15	951.6	384.8	9	13	1233.05	273	9	12	911.95	233.35
9	16	952.9	384.15	9	14	1229.15	268.45	9	13	913.9	238.55
9	17	959.4	369.2	9	15	1228.5	266.5	9	14	918.45	246.35
9	18	961.35	362.05	9	16	1227.2	265.2	9	15	916.5	252.85
9	19	955.5	365.95	9	17	1230.45	263.9	9	16	914.55	254.8
9	20	953.55	367.9	9	18	1233.05	264.55	9	17	912.6	254.8
9	21	955.5	370.5	9	19	1233.7	265.2	9	18	915.85	250.25
9	22	956.15	369.85	9	20	1230.45	267.8	9	19	922.35	247
9	23	956.8	369.85	9	21	1230.45	271.7	9	20	928.2	247.65
9	24	956.15	371.15	9	22	1234.35	272.35	9	21	931.45	245.7
9	25	956.8	375.7	9	23	1235.65	281.45	9	22	936	243.75
9	26	956.8	378.95	9	24	1238.9	290.55	9	23	937.3	244.4
9	27	952.25	383.5	9	25	1241.5	299.65	9	24	930.8	250.9
9	28	949.65	390	9	26	1243.45	308.1	9	25	936	252.2
9	29	950.3	393.25	9	27	1244.75	312	9	26	937.3	250.9
9	30	950.95	393.25	9	28	1246.7	320.45	9	27	939.9	248.3
9	31	951.6	394.55	9	29	1248.65	323.05	9	28	950.95	243.75
9	32	954.85	397.8	9	30	1249.95	325	9	29	969.15	235.3
9	33	956.15	401.05	9	31	1254.5	328.25	9	30	983.45	232.05
9	34	956.15	404.95	9	32	1256.45	332.15	9	31	986.05	241.15
9	35	952.25	409.5	9	33	1257.1	334.75	9	32	980.85	241.15
9	36	944.45	419.9	9	34	1260.35	339.3	9	33	983.45	237.9
9	37	934.7	426.4	9	35	1262.3	345.15	9	34	1001	255.45
9	38	927.55	432.25	9	36	1264.9	349.7	9	35	1006.2	268.45
9	39	919.75	432.25	9	37	1268.15	355.55	9	36	1011.4	270.4
9	40	919.1	429.65	9	38	1271.4	364.65	9	37	1011.4	273.65
9	41	917.8	427.7	9	39	1274.65	365.95	9	38	1012.05	275.6
9	42	917.8	426.4	9	40	1277.25	368.55	9	39	1012.7	276.9
9	43	917.15	425.75	9	41	1277.25	369.85	9	40	1009.45	280.8
9	44	917.15	425.75	9	42	1277.25	370.5	9	41	1006.2	286
9	45	917.15	427.05	9	43	1278.55	370.5	9	42	1007.5	286.65
9	46	917.8	425.75	9	44	1281.8	373.75	9	43	1008.15	287.95
9	47	920.4	425.75	9	45	1282.45	377.65	9	44	1007.5	286
10	0	1403.35	417.3	9	46	1284.4	378.95	9	45	1006.85	280.8
10	1	1401.4	416	9	47	1286.35	381.55	9	46	1005.55	278.2
10	2	1402.05	415.35	10	0	306.8	285.35	9	47	1004.9	273.65
10	3	1404.65	412.75	10	1	307.45	284.7	10	0	447.85	222.95
10	4	1408.55	408.85	10	2	301.6	283.4	10	1	447.85	216.45
10	5	1415.7	399.75	10	3	301.6	284.05	10	2	448.5	213.2
10	6	1420.25	390	10	4	298.35	284.7	10	3	446.55	208
10	7	1423.5	377	10	5	297.7	284.05	10	4	447.2	200.85
10	8	1431.95	373.1	10	6	294.45	284.7	10	5	447.2	196.95
10	9	1431.95	377.65	10	7	296.4	284.05	10	6	446.55	194.35
10	10	1431.3	377	10	8	295.75	284.7	10	7	444.6	193.7
10	11	1432.6	375.7	10	9	300.3	286	10	8	444.6	193.05
10	12	1432.6	373.1	10	10	293.8	283.4	10	9	443.3	190.45
10	13	1433.25	370.5	10	11	291.2	283.4	10	10	444.6	190.45
10	14	1432.6	369.85	10	12	289.9	282.1	10	11	446.55	191.1
10	15	1437.8	367.9	10	13	286	280.8	10	12	446.55	191.1
10	16	1440.4	368.55	10	14	286	282.1	10	13	446.55	189.8
10	17	1442.35	367.25	10	15	282.1	284.05	10	14	445.9	187.2
10	18	1443.65	366.6	10	16	281.45	283.4	10	15	447.2	188.5
10	19	1443.65	367.9	10	17	282.75	282.1	10	16	449.15	191.1
10	20	1444.3	366.6	10	18	284.05	281.45	10	17	451.75	191.1
10	21	1448.2	365.95	10	19	286	279.5	10	18	455	189.8
10	22	1450.15	365.3	10	20	286.65	278.2	10	19	456.95	187.2
10	23	1450.15	364.65	10	21	289.9	276.25	10	20	458.25	185.25
10	24	1450.8	363.35	10	22	289.25	274.95	10	21	458.9	181.35
10	25	1450.15	364.65	10	23	299.65	273.65	10	22	461.5	173.55
10	26	1452.75	367.25	10	24	305.5	271.7	10	23	463.45	173.55
10	27	1451.45	368.55	10	25	308.1	269.1	10	24	465.4	172.9
10	28	1450.8	368.55	10	26	306.15	272.35	10	25	467.35	172.25
10	29	1454.05	368.55	10	27	308.75	271.7	10	26	469.3	171.6
10	30	1488.5	343.2	10	28	312	271.7	10	27	469.95	169.65
10	31	1489.8	344.5	10	29	315.9	273	10	28	475.15	172.25
10	32	1495.65	342.55	10	30	317.2	273.65	10	29	477.1	170.95
10	33	1496.95	349.7	10	31	319.8	272.35	10	30	480.35	172.9
10	34	1493.7	347.75	10	32	319.15	274.95	10	31	484.25	170.95
10	35	1492.4	344.5	10	33	317.85	274.3	10	32	487.5	170.95
10	36	1491.75	347.75	10	34	315.25	278.2	10	33	486.2	167.7
10	40	1504.75	339.95	10	35	316.55	276.25	10	34	486.85	169.65
10	41	1512.55	335.4	10	36	313.3	272.35	10	35	487.5	173.55
10	42	1517.75	330.85	10	37	313.3	269.1	10	36	488.15	176.8
10	43	1524.9	324.35	10	38	313.3	270.4	10	37	500.5	201.5
10	44	1532.7	312	10	39	311.35	265.85	10	38	501.15	200.2
10	45	1535.95	304.85	10	40	310.7	263.9	10	39	501.8	199.55
10	46	1534.65	301.6	10	41	312	260.65	10	40	503.1	196.95
10	47	1530.1	298.35	10	42	307.45	257.4	10	41	503.1	200.2
11	0	1470.3	434.2	10	43	308.75	254.8	10	42	505.05	203.45
11	1	1469.65	428.35	10	44	307.45	250.25	10	43	507	204.75
11	2	1470.3	428.35	10	45	306.15	247.65	10	44	508.3	209.3
11	3	1476.8	415.35	10	46	303.55	243.75	10	45	510.9	208
11	4	1483.3	404.3	10	47	304.2	242.45	10	46	509.6	205.4
11	5	1486.55	399.75	11	0	1187.55	327.6	10	47	502.45	206.7
11	6	1489.15	397.8	11	1	1185.6	334.75	11	0	1369.55	238.55
11	7	1487.85	390.65	11	2	1181.7	344.5	11	1	1367.6	237.25
11	8	1502.8	379.6	11	3	1179.1	345.8	11	2	1365	238.55
11	9	1510.6	375.05	11	4	1176.5	345.8	11	3	1364.35	237.9
11	10	1515.15	381.55	11	5	1178.45	349.05	11	4	1363.7	236.6
11	11	1516.45	391.95	11	6	1178.45	352.95	11	5	1361.75	235.3
11	12	1515.8	393.25	11	7	1179.75	354.9	11	6	1362.4	234
11	13	1508.65	393.25	11	8	1182.35	359.45	11	7	1357.85	230.75
11	14	1509.3	393.9	11	9	1180.4	364.65	11	8	1353.3	228.8
11	15	1511.25	397.15	11	10	1176.5	366.6	11	9	1348.75	227.5
11	16	1513.85	403	11	11	1173.9	363.35	11	10	1342.9	226.85
11	17	1519.05	404.95	11	12	1170	360.1	11	11	1339	228.8
11	18	1525.55	402.35	11	13	1166.75	356.85	11	12	1333.15	232.7
11	19	1535.95	388.7	11	14	1167.4	354.25	11	13	1329.25	233.35
11	20	1530.75	383.5	11	15	1166.75	355.55	11	14	1325.35	232.7
11	21	1521	386.75	11	16	1166.1	354.9	11	15	1322.75	231.4
11	22	1507.35	399.1	11	17	1167.4	355.55	11	16	1318.85	232.05
11	23	1498.25	411.45	11	18	1168.05	359.45	11	17	1316.25	234.65
11	24	1502.15	425.75	11	19	1169.35	360.75	11	18	1311.05	237.25
11	25	1500.85	430.95	11	20	1168.7	360.75	11	19	1309.75	240.5
11	26	1506.7	432.25	11	21	1166.75	362.05	11	20	1303.9	243.1
11	27	1513.85	422.5	11	22	1166.75	362.7	11	21	1298.7	242.45
11	28	1511.25	410.8	11	23	1166.1	364	11	22	1290.25	242.45
11	29	1508.65	409.5	11	24	1169.35	367.25	11	23	1286.35	245.05
11	30	1499.55	416.65	11	25	1171.3	367.9	11	24	1285.05	247
11	31	1496.3	426.4	11	26	1173.9	369.2	11	25	1286.35	242.45
11	32	1494.35	429	11	27	1179.75	372.45	11	26	1287.65	240.5
11	33	1487.85	432.25	11	28	1179.75	369.2	11	27	1288.95	239.2
11	34	1487.2	427.05	11	29	1180.4	367.25	11	28	1289.6	241.8
11	35	1485.9	423.8	11	30	1181.05	364	11	29	1290.25	241.15
11	36	1487.85	414.7	11	31	1181.7	362.7	11	30	1292.2	243.1
11	40	1478.1	403	11	32	1182.35	362.7	11	31	1294.8	245.7
11	41	1480.05	406.9	11	33	1181.7	362.7	11	32	1298.05	249.6
11	42	1482.65	403	11	34	1179.1	362.7	11	33	1300	248.95
11	43	1483.95	394.55	11	35	1172.6	354.9	11	34	1301.95	250.9
11	44	1483.95	383.5	11	36	1168.7	352.95	11	35	1303.9	254.15
11	45	1494.35	385.45	11	37	1169.35	352.3	11	36	1303.9	260
11	46	1504.75	383.5	11	38	1166.75	356.2	11	37	1303.9	261.95
11	47	1508.65	384.8	11	39	1162.2	356.85	11	38	1303.25	263.9
12	0	1177.15	431.6	11	40	1157	358.8	11	39	1302.6	267.8
12	1	1177.8	432.9	11	41	1155.05	360.1	11	40	1301.3	267.8
12	2	1179.75	434.85	11	42	1152.45	358.15	11	41	1300	267.8
12	3	1179.1	431.6	11	43	1150.5	358.8	11	42	1300.65	266.5
12	4	1178.45	427.7	11	44	1149.85	357.5	11	43	1300.65	265.85
12	5	1178.45	422.5	11	45	1151.15	360.1	11	44	1301.95	269.1
12	6	1181.7	417.95	11	46	1149.2	357.5	11	45	1301.95	271.05
12	7	1184.3	416.65	11	47	1146.6	356.85	11	46	1301.3	269.1
12	8	1186.25	417.3	12	0	1604.85	327.6	11	47	1303.9	271.7
12	9	1192.75	416	12	1	1605.5	332.8	12	0	68.25	239.2
12	10	1195.35	417.3	12	2	1606.8	346.45	12	1	66.95	239.85
12	11	1205.1	418.6	12	3	1612	358.8	12	2	65.65	240.5
12	12	1216.15	417.95	12	4	1608.75	369.2	12	3	65.65	239.85
12	13	1224.6	413.4	12	5	1608.75	376.35	12	4	65.65	239.85
12	14	1227.85	408.2	12	6	1610.7	378.3	12	5	63.7	241.15
12	15	1232.4	417.95	12	7	1613.95	376.35	12	6	61.75	241.15
12	16	1231.1	425.1	12	8	1616.55	377	12	7	59.8	241.15
12	17	1229.8	439.4	12	9	1623.7	380.9	12	8	56.55	241.8
12	18	1228.5	449.15	12	10	1628.25	395.2	12	9	54.6	240.5
12	19	1231.75	450.45	12	11	1630.85	406.9	12	10	49.4	241.15
12	20	1235	449.8	12	12	1632.15	410.8	12	11	44.2	239.85
12	21	1236.3	448.5	12	13	1629.55	417.95	12	12	40.3	235.3
12	22	1236.3	449.15	12	14	1629.55	420.55	12	13	40.3	233.35
12	23	1237.6	454.35	12	15	1625	419.9	12	14	40.3	228.8
12	24	1238.25	461.5	12	16	1621.1	421.2	12	15	40.95	219.05
12	25	1240.2	471.9	12	17	1619.8	426.4	12	16	40.95	214.5
12	26	1238.25	476.45	12	18	1614.6	436.15	12	17	40.95	210.6
12	27	1236.3	478.4	12	19	1607.45	441.35	12	18	42.25	209.95
12	28	1234.35	482.3	12	20	1603.55	445.25	12	19	42.9	208
12	29	1234.35	486.2	12	21	1596.4	449.8	12	20	42.9	207.35
12	30	1236.3	492.7	12	22	1591.2	448.5	12	21	44.2	204.75
12	31	1238.9	501.8	12	23	1586.65	447.2	12	22	44.85	204.1
12	32	1238.25	508.95	12	24	1584.05	448.5	12	23	44.2	202.8
12	33	1244.1	509.6	12	25	1584.05	450.45	12	24	43.55	198.25
12	34	1246.7	512.85	12	26	1584.7	456.3	12	25	42.9	191.1
12	35	1248	514.8	12	27	1582.75	462.15	12	27	43.55	169.65
12	36	1251.25	517.4	12	28	1582.1	473.2	12	28	46.8	176.15
12	37	1259.05	520	12	29	1586.65	486.2	12	29	50.7	177.45
12	38	1262.95	524.55	12	30	1593.15	494.65	12	30	48.1	179.4
12	39	1272.7	533	12	31	1602.25	503.1	12	31	44.85	177.45
12	40	1281.8	540.15	12	32	1603.55	508.3	12	32	43.55	172.9
12	41	1288.95	545.35	12	33	1609.4	508.3	12	33	42.25	170.95
12	42	1298.05	547.95	12	34	1615.25	514.8	12	34	42.9	169.65
12	43	1305.2	545.35	12	35	1621.1	515.45	12	35	45.5	169.65
12	44	1304.55	550.55	12	36	1626.95	522.6	12	36	46.15	168.35
12	45	1301.95	557.05	12	37	1633.45	531.05	12	37	46.8	164.45
12	46	1298.05	555.75	12	38	1638	542.1	12	38	46.8	163.8
12	47	1295.45	554.45	12	39	1663.35	553.15	12	39	46.8	163.15
13	0	585	440.7	12	40	1663.35	567.45	12	40	45.5	166.4
13	1	586.3	438.75	12	41	1663.35	568.75	12	41	44.2	172.9
13	2	589.55	433.55	12	42	1663.35	559.65	12	42	44.2	172.9
13	3	592.8	429	12	43	1663.35	558.35	12	43	45.5	179.4
13	4	594.75	427.7	12	46	1663.35	553.8	12	44	46.15	183.95
13	5	593.45	424.45	12	47	1663.35	547.95	12	45	46.15	188.5
13	6	591.5	421.85	13	0	311.35	404.3	12	46	46.15	193.7
13	7	588.25	419.25	13	1	312	398.45	12	47	46.15	196.3
13	8	586.3	413.4	13	2	313.3	394.55	13	0	1534.65	284.05
13	9	585.65	408.85	13	3	307.45	393.9	13	1	1540.5	287.3
13	10	584.35	410.15	13	4	304.85	393.25	13	2	1539.2	289.9
13	11	583.05	411.45	13	5	305.5	395.85	13	3	1540.5	290.55
13	12	580.45	412.75	13	6	304.85	396.5	13	4	1535.3	289.9
13	13	581.1	410.8	13	7	308.75	394.55	13	5	1541.15	288.6
13	14	583.7	409.5	13	8	307.45	394.55	13	6	1554.8	295.1
13	15	588.25	408.2	13	9	308.1	395.2	13	7	1566.5	307.45
13	16	590.2	408.2	13	10	308.75	391.95	13	8	1576.25	323.7
13	17	595.4	406.9	13	11	313.3	386.1	13	9	1593.15	334.75
13	18	595.4	406.9	13	12	323.7	382.85	13	10	1609.4	333.45
13	19	596.05	404.95	13	13	328.9	379.6	13	11	1613.3	328.9
13	20	596.7	404.95	13	14	334.1	379.6	13	12	1610.7	326.95
13	21	594.75	402.35	13	15	341.25	379.6	13	13	1609.4	325
13	22	592.8	399.75	13	16	340.6	377.65	13	14	1604.85	325
13	23	594.75	399.1	13	17	341.25	378.3	13	15	1595.75	326.3
13	24	598	399.1	13	18	345.8	381.55	13	16	1581.45	319.8
13	25	597.35	400.4	13	19	351	382.2	13	17	1574.95	299
13	26	598.65	401.05	13	20	360.1	380.9	13	18	1589.25	288.6
13	27	599.3	403.65	13	21	364.65	373.75	13	19	1601.6	289.9
13	28	596.05	401.7	13	22	371.15	372.45	13	20	1606.15	295.75
13	29	592.8	395.85	13	23	373.75	372.45	13	21	1612	296.4
13	30	588.25	389.35	13	24	370.5	379.6	13	22	1621.1	294.45
13	31	576.55	384.8	13	25	371.15	384.15	13	23	1623.05	289.9
13	32	576.55	384.8	13	26	369.85	393.9	13	24	1625	289.25
13	33	581.75	379.6	13	27	364	401.7	13	25	1632.15	294.45
13	34	586.95	372.45	13	28	352.95	412.75	13	26	1641.9	304.2
13	35	588.9	369.2	13	29	338	412.1	13	27	1646.45	312.65
13	36	597.35	358.8	13	30	319.8	416.65	13	28	1638.65	326.3
13	37	599.3	356.85	13	31	302.25	406.9	13	29	1631.5	338.65
13	38	601.25	352.3	13	32	294.45	405.6	13	30	1625.65	352.3
13	39	602.55	350.35	13	33	293.15	398.45	13	31	1615.9	357.5
13	40	605.15	351	13	34	297.05	399.1	13	32	1613.3	352.3
13	43	603.2	343.2	13	35	299	410.8	13	33	1612	338
13	44	606.45	337.35	13	36	296.4	411.45	13	34	1621.1	323.05
13	45	603.85	328.9	13	37	293.15	409.5	13	35	1640.6	318.5
13	46	599.3	323.05	13	38	299.65	397.15	13	36	1663.35	320.45
13	47	598.65	324.35	13	39	293.8	379.6	13	37	1663.35	321.75
14	0	784.55	450.45	13	41	271.7	395.85	13	38	1663.35	325
14	1	783.9	451.1	13	42	261.95	413.4	13	39	1663.35	336.7
14	2	781.95	456.3	13	43	258.05	416	13	40	1638.65	338
14	3	783.25	454.35	13	44	264.55	420.55	13	41	1628.25	336.7
14	4	783.25	453.7	13	45	274.3	416.65	13	42	1614.6	328.25
14	5	783.25	453.05	13	46	289.25	417.95	13	43	1611.35	322.4
14	6	782.6	456.3	13	47	289.25	416	13	44	1610.05	315.25
14	7	785.2	452.4	14	0	668.85	375.7	13	45	1612.65	315.9
14	8	790.4	449.15	14	1	657.15	385.45	13	46	1625.65	321.1
14	9	789.1	440.7	14	2	646.75	396.5	13	47	1626.95	323.05
14	10	786.5	438.75	14	3	635.7	408.85	14	0	210.6	294.45
14	11	785.2	437.45	14	4	627.9	415.35	14	1	208	294.45
14	12	786.5	438.1	14	5	624.65	414.7	14	2	207.35	288.6
14	13	785.2	438.1	14	6	625.95	415.35	14	3	204.1	276.25
14	14	784.55	439.4	14	7	629.2	414.7	14	4	208.65	284.7
14	15	785.85	440.05	14	8	631.8	414.05	14	5	189.15	300.95
14	16	786.5	441.35	14	9	633.1	415.35	14	6	192.4	301.6
14	17	785.2	441.35	14	10	631.8	414.7	14	7	193.7	302.25
14	18	785.2	443.95	14	11	627.25	408.2	14	8	192.4	297.7
14	19	786.5	446.55	14	12	623.35	411.45	14	9	196.95	300.95
14	20	787.15	447.85	14	13	628.55	408.2	14	10	202.8	298.35
14	21	787.8	450.45	14	14	634.4	401.7	14	11	209.3	293.15
14	22	790.4	450.45	14	15	638.3	395.2	14	12	212.55	289.9
14	23	793	452.4	14	16	640.9	391.3	14	13	215.8	286
14	24	794.3	451.75	14	17	642.2	387.4	14	14	217.75	282.75
14	25	793.65	449.15	14	18	645.45	382.85	14	15	217.75	280.15
14	26	792.35	447.2	14	19	645.45	378.3	14	16	216.45	276.25
14	27	790.4	446.55	14	20	645.45	373.75	14	17	215.15	276.25
14	28	791.05	445.9	14	21	651.95	365.95	14	18	215.8	275.6
14	29	789.75	447.85	14	22	657.15	358.15	14	19	213.85	274.3
14	30	789.75	448.5	14	23	660.4	351.65	14	20	211.25	271.7
14	31	792.35	447.2	14	24	658.45	343.85	14	21	211.9	267.15
14	32	791.05	446.55	14	25	656.5	336.7	14	22	213.85	263.9
14	33	790.4	447.2	14	26	657.15	332.15	14	23	213.85	261.3
14	34	791.05	449.15	14	27	655.85	328.25	14	24	213.2	260.65
14	35	793	445.9	14	28	652.6	326.95	14	25	213.2	259.35
14	36	792.35	445.25	14	29	651.3	325.65	14	26	213.2	259.35
14	37	793.65	445.9	14	30	651.3	325.65	14	27	215.8	254.15
14	38	799.5	449.8	14	31	652.6	323.7	14	28	216.45	251.55
14	39	800.8	449.15	14	32	652.6	321.1	14	29	224.9	239.2
14	40	798.85	451.1	14	33	652.6	315.9	14	30	219.7	239.85
14	41	802.75	450.45	14	34	648.7	315.9	14	31	219.05	239.85
14	42	802.1	452.4	14	35	645.45	317.85	14	32	217.1	240.5
14	43	802.75	449.15	14	36	648.7	313.95	14	33	213.85	243.75
14	44	806	449.15	14	37	651.3	303.55	14	34	209.95	245.05
14	45	807.3	451.1	14	38	649.35	297.7	14	35	208.65	244.4
14	46	806.65	451.75	14	39	648.7	287.95	14	36	210.6	243.1
14	47	807.3	452.4	14	40	646.75	282.1	14	37	206.05	241.15
15	0	198.9	453.7	14	41	644.8	276.25	14	38	198.9	248.95
15	1	198.9	455.65	14	42	642.2	273.65	14	39	193.7	257.4
15	2	198.9	459.55	14	43	637.65	269.1	14	40	187.85	263.25
15	3	198.25	462.15	14	44	634.4	267.15	14	41	173.55	266.5
15	4	197.6	463.45	14	45	629.2	263.9	14	42	167.7	267.8
15	5	196.3	465.4	14	46	624	260	14	43	158.6	274.95
15	6	196.3	466.05	14	47	617.5	257.4	14	44	153.4	280.8
15	7	195	468	15	0	1251.9	428.35	14	45	151.45	283.4
15	8	193.7	468.65	15	1	1253.85	427.05	14	46	148.85	285.35
15	9	191.1	471.25	15	2	1255.8	427.05	14	47	146.9	286.65
15	10	189.15	473.2	15	3	1259.05	427.05	15	0	663	300.3
15	11	186.55	476.45	15	4	1261	426.4	15	1	663	302.25
15	12	185.25	477.1	15	5	1265.55	424.45	15	2	662.35	305.5
15	13	182.65	477.75	15	6	1264.9	424.45	15	3	661.7	304.85
15	14	182.65	477.1	15	7	1265.55	427.05	15	4	659.75	305.5
15	15	181.35	475.8	15	8	1266.85	429	15	5	659.1	304.85
15	16	182	475.15	15	9	1266.2	425.75	15	6	657.15	301.6
15	17	182.65	472.55	15	10	1264.25	420.55	15	7	657.15	297.7
15	18	182.65	471.25	15	11	1263.6	415.35	15	8	659.75	294.45
15	19	183.95	471.25	15	12	1262.3	408.85	15	9	663.65	291.85
15	20	183.3	471.9	15	13	1263.6	403	15	10	666.9	292.5
15	21	182.65	471.9	15	14	1262.95	401.05	15	11	666.9	294.45
15	22	180.7	472.55	15	15	1262.95	397.8	15	12	667.55	293.15
15	23	179.4	473.2	15	16	1264.25	393.9	15	13	666.9	291.85
15	24	177.45	472.55	15	17	1264.9	391.3	15	14	664.3	293.15
15	25	176.15	473.85	15	18	1265.55	389.35	15	15	668.2	295.75
15	26	174.2	474.5	15	19	1269.45	384.15	15	16	672.75	299.65
15	27	173.55	473.85	15	20	1275.3	377.65	15	17	676.65	303.55
15	28	172.9	472.55	15	21	1279.85	377.65	15	18	681.2	307.45
15	29	170.95	481.65	15	22	1284.4	377	15	19	689.65	308.75
15	30	175.5	483.6	15	23	1287.65	376.35	15	20	693.55	308.75
15	31	164.45	487.5	15	24	1288.95	370.5	15	21	702	311.35
15	32	165.1	483.6	15	25	1300	362.05	15	22	707.2	312.65
15	33	167.7	482.3	15	26	1306.5	349.7	15	23	709.8	313.3
15	34	165.75	479.7	15	27	1313	335.4	15	24	707.2	315.9
15	35	165.75	481	15	28	1316.25	319.15	15	25	705.25	319.15
15	36	168.35	482.95	15	29	1314.95	300.3	15	26	701.35	321.75
15	37	170.95	484.25	15	30	1307.15	282.75	15	27	697.45	321.75
15	38	172.9	486.2	15	31	1298.05	256.75	15	28	690.3	327.6
15	39	174.2	486.2	15	32	1297.4	239.85	15	29	689	326.95
15	40	174.85	486.85	15	33	1295.45	233.35	15	30	686.4	327.6
15	41	175.5	484.9	15	34	1301.3	230.1	15	31	687.05	328.25
15	42	178.75	484.9	15	35	1315.6	227.5	15	32	688.35	329.55
15	43	187.2	471.25	15	36	1321.45	230.1	15	33	698.1	330.85
15	44	189.15	464.75	15	37	1324.05	228.8	15	34	713.05	330.2
15	45	185.9	462.15	15	38	1326.65	226.85	15	35	724.1	327.6
15	46	188.5	461.5	15	39	1332.5	226.85	15	36	729.3	319.8
15	47	191.1	463.45	15	40	1336.4	222.95	15	37	726.05	315.25
16	0	1064.7	458.9	15	41	1333.8	219.05	15	38	723.45	313.95
16	1	1068.6	459.55	15	42	1335.75	218.4	15	39	725.4	317.2
16	2	1071.2	460.85	15	43	1335.1	221.65	15	40	720.2	319.15
16	3	1073.15	461.5	15	44	1331.2	217.1	15	41	701.35	326.3
16	4	1075.75	462.15	15	45	1329.9	211.9	15	42	702	326.95
16	5	1077.7	461.5	15	46	1329.9	209.3	15	43	700.05	325.65
16	6	1077.05	458.9	15	47	1322.75	212.55	15	44	698.75	324.35
16	7	1077.7	456.95	16	0	869.05	441.35	15	45	695.5	328.9
16	8	1075.75	453.7	16	1	872.3	442.65	15	46	696.8	328.25
16	9	1073.15	452.4	16	2	872.3	442.65	15	47	700.05	322.4
16	10	1073.15	451.1	16	3	871	443.95	16	0	69.55	310.7
16	11	1078.35	448.5	16	4	877.5	448.5	16	1	70.2	307.45
16	12	1076.4	448.5	16	5	875.55	460.2	16	2	66.95	309.4
16	13	1077.7	447.85	16	6	869.7	456.95	16	3	63.05	311.35
16	14	1080.95	449.8	16	7	867.75	454.35	16	4	61.75	312.65
16	15	1080.95	449.8	16	8	865.15	458.25	16	5	59.8	314.6
16	16	1084.85	452.4	16	9	868.4	464.75	16	6	56.55	317.85
16	17	1089.4	451.1	16	10	868.4	466.7	16	7	52.65	319.15
16	18	1091.35	452.4	16	11	869.7	465.4	16	8	51.35	320.45
16	19	1092	453.05	16	12	872.3	468	16	9	50.05	321.75
16	20	1089.4	452.4	16	13	874.25	468	16	10	48.75	321.75
16	21	1088.1	451.75	16	14	872.3	470.6	16	11	46.8	321.75
16	22	1075.1	443.3	16	15	871	464.1	16	12	44.85	321.1
16	23	1088.1	444.6	16	16	877.5	468.65	16	13	38.35	322.4
16	24	1086.8	444.6	16	17	884.65	474.5	16	14	35.75	321.1
16	25	1083.55	446.55	16	18	886.6	483.6	16	15	35.1	321.1
16	26	1079	443.95	16	19	884	499.2	16	16	33.15	320.45
16	27	1075.1	441.35	16	20	877.5	514.15	16	17	31.2	321.75
16	28	1071.85	440.05	16	21	869.05	536.25	16	18	30.55	323.05
16	29	1070.55	437.45	16	22	859.95	543.4	16	19	27.3	325.65
16	30	1066.65	435.5	16	23	852.8	547.3	16	20	27.3	325.65
16	31	1058.2	436.15	16	24	857.35	547.3	16	21	26.65	328.25
16	32	1056.25	436.8	16	25	865.15	546.65	16	22	27.3	325
16	33	1055.6	434.85	16	26	858	548.6	16	23	27.95	326.3
16	34	1051.7	433.55	16	27	848.25	558.35	16	24	29.9	326.95
16	35	1045.2	431.6	16	28	840.45	570.7	16	25	30.55	325.65
16	36	1039.35	433.55	16	29	845	580.45	16	26	30.55	322.4
16	37	1033.5	436.15	16	30	850.2	581.75	16	27	29.9	315.9
16	38	1028.3	436.8	16	31	859.95	584.35	16	28	30.55	313.3
16	39	1025.05	433.55	16	32	862.55	585.65	16	29	29.25	314.6
16	40	1023.75	430.3	16	33	866.45	583.7	16	30	28.6	315.25
16	41	1019.85	427.7	16	34	874.9	572	16	31	31.85	310.7
16	42	1015.3	427.7	16	35	887.25	568.1	16	32	37.05	307.45
16	43	1014.65	428.35	16	36	895.05	564.85	16	33	40.3	303.55
16	44	1014	428.35	16	37	895.7	563.55	16	34	42.25	302.9
16	45	1023.1	429	16	38	888.55	553.15	16	35	43.55	299
16	46	1035.45	427.05	16	39	881.4	559.65	16	36	44.85	298.35
16	47	1046.5	425.75	16	40	869.7	559.65	16	37	44.85	299.65
17	0	646.75	473.85	16	41	856.7	551.2	16	38	42.9	302.9
17	1	644.8	473.85	16	42	856.7	551.85	16	39	42.9	302.9
17	2	642.2	476.45	16	43	865.8	553.8	16	40	40.3	306.15
17	3	640.25	477.1	16	44	868.4	542.75	16	41	40.95	306.8
17	4	637.65	479.05	16	45	865.15	537.55	16	42	41.6	308.75
17	5	636.35	482.3	16	46	870.35	536.25	16	43	42.9	311.35
17	6	634.4	488.15	16	47	881.4	531.7	16	44	44.2	312
17	7	635.05	486.2	17	0	1027	464.75	16	45	44.85	312.65
17	8	633.1	484.9	17	1	1021.8	465.4	16	46	47.45	308.75
17	9	634.4	484.25	17	2	1021.15	467.35	16	47	45.5	306.8
17	10	634.4	486.85	17	3	1021.15	469.3	17	0	1601.6	327.6
17	11	635.05	486.85	17	4	1021.15	471.25	17	1	1606.15	326.3
17	12	635.05	486.2	17	5	1019.85	471.9	17	2	1611.35	325
17	13	636.35	486.2	17	6	1020.5	479.7	17	3	1615.9	321.75
17	14	635.05	486.85	17	7	1018.55	485.55	17	4	1619.15	320.45
17	15	635.7	486.85	17	8	1011.4	486.2	17	5	1626.95	318.5
17	16	636.35	484.9	17	9	1003.6	485.55	17	6	1636.7	321.1
17	17	635.05	483.6	17	10	995.8	484.9	17	7	1663.35	322.4
17	18	634.4	484.9	17	11	985.4	485.55	17	8	1663.35	323.7
17	19	629.85	484.9	17	12	978.25	486.85	17	9	1663.35	323.05
17	20	627.25	482.95	17	13	965.25	482.3	17	10	1663.35	328.25
17	21	630.5	482.95	17	14	962	482.95	17	12	1663.35	338.65
17	22	628.55	481	17	15	962.65	486.2	17	13	1663.35	343.85
17	23	625.3	481	17	16	962	490.75	17	14	1663.35	349.05
17	24	622.7	481	17	17	966.55	492.05	17	15	1663.35	354.25
17	25	619.45	479.05	17	18	969.8	494	17	16	1663.35	356.85
17	26	617.5	477.1	17	19	970.45	494	17	17	1663.35	357.5
17	27	615.55	474.5	17	20	973.7	492.7	17	18	1663.35	362.05
17	28	611	473.2	17	21	975	488.8	17	19	1663.35	361.4
17	29	607.1	469.3	17	22	980.85	492.7	17	20	1663.35	359.45
17	30	605.15	469.3	17	23	1001	493.35	17	21	1663.35	358.8
17	31	598	469.3	17	24	1001.65	494.65	17	22	1652.3	357.5
17	32	596.05	467.35	17	25	1001	483.6	17	23	1630.85	358.8
17	33	594.75	462.8	17	26	997.75	479.05	17	24	1625	361.4
17	34	596.7	458.9	17	27	987.35	473.85	17	25	1612.65	362.05
17	35	597.35	456.95	17	28	977.6	474.5	17	26	1608.1	371.8
17	36	593.45	458.9	17	29	975.65	467.35	17	27	1602.25	380.9
17	37	587.6	460.2	17	30	988	449.8	17	28	1600.95	392.6
17	38	585.65	461.5	17	31	986.7	424.45	17	29	1602.9	399.75
17	39	581.75	458.25	17	32	986.05	415.35	17	30	1606.15	401.05
17	40	579.15	454.35	17	33	989.95	415.35	17	31	1604.85	398.45
17	41	579.15	451.1	17	34	993.2	410.8	17	32	1590.55	400.4
17	42	577.2	446.55	17	35	1004.9	403.65	17	33	1570.4	395.85
17	43	574.6	441.35	17	36	1019.85	402.35	17	34	1552.85	394.55
17	44	572	438.75	17	37	1027	401.05	17	35	1539.2	388.05
17	45	571.35	443.3	17	38	1031.55	401.05	17	36	1534	382.2
17	46	571.35	445.9	17	39	1032.85	401.7	17	37	1532.7	381.55
17	47	572.65	449.8	17	40	1030.25	404.95	17	38	1525.55	375.7
18	0	91	520.65	17	41	1027	409.5	17	39	1520.35	374.4
18	1	91.65	520.65	17	42	1019.85	417.95	17	40	1515.8	374.4
18	2	90.35	520	17	43	1014	422.5	17	41	1509.95	373.1
18	3	93.6	516.1	17	44	1011.4	427.05	17	42	1503.45	370.5
18	4	94.25	511.55	17	45	1009.45	429	17	43	1497.6	367.25
18	5	97.5	508.95	17	46	1010.1	430.3	17	44	1487.85	365.3
18	6	100.75	506.35	17	47	1010.75	432.9	17	45	1480.7	364.65
18	7	100.1	502.45	18	0	796.9	488.15	17	46	1475.5	363.35
18	8	91	490.1	18	1	799.5	482.95	17	47	1469.65	360.75
18	9	84.5	482.95	18	2	800.15	481	18	0	910	328.9
18	10	83.2	482.3	18	3	801.45	482.3	18	1	911.3	328.25
18	11	82.55	482.3	18	4	801.45	481	18	2	911.3	327.6
18	12	85.8	481.65	18	5	802.75	478.4	18	3	913.9	328.25
18	13	90.35	479.05	18	6	802.75	477.1	18	4	914.55	326.3
18	14	95.55	474.5	18	7	802.1	475.8	18	5	915.2	325
18	15	95.55	473.2	18	8	800.15	479.05	18	6	917.15	327.6
18	16	93.6	475.15	18	9	800.15	475.8	18	7	919.1	328.9
18	17	92.95	474.5	18	10	800.15	473.85	18	8	919.75	332.15
18	18	92.3	474.5	18	11	800.15	472.55	18	9	923	336.05
18	19	92.95	473.2	18	12	798.2	474.5	18	10	923.65	338
18	20	92.3	474.5	18	13	800.15	468.65	18	11	926.9	343.85
18	21	91.65	474.5	18	14	799.5	470.6	18	12	926.9	345.15
18	22	90.35	472.55	18	15	798.2	470.6	18	13	932.75	352.3
18	23	90.35	471.9	18	16	799.5	470.6	18	14	939.9	354.25
18	24	91	469.3	18	17	802.1	471.9	18	15	945.1	360.75
18	25	89.7	469.3	18	18	802.1	471.9	18	16	950.3	366.6
18	26	89.05	469.3	18	19	802.1	475.15	18	17	956.15	369.2
18	27	91	467.35	18	20	801.45	479.7	18	18	964.6	369.85
18	28	92.95	466.05	18	21	799.5	481	18	19	968.5	371.15
18	29	94.9	465.4	18	22	798.2	479.7	18	20	968.5	377
18	30	97.5	464.1	18	23	796.25	479.05	18	21	963.3	383.5
18	31	96.2	464.1	18	24	793.65	482.3	18	22	957.45	387.4
18	32	95.55	463.45	18	25	792.35	483.6	18	23	951.6	394.55
18	33	95.55	465.4	18	26	792.35	484.9	18	24	949.65	397.8
18	34	96.2	465.4	18	27	792.35	489.45	18	25	947.05	401.05
18	35	98.8	465.4	18	28	792.35	494	18	26	944.45	404.3
18	36	100.1	466.05	18	29	791.7	495.95	18	27	942.5	405.6
18	37	99.45	466.7	18	30	792.35	491.4	18	28	941.85	406.9
18	38	102.05	469.3	18	31	795.6	490.1	18	29	939.25	408.85
18	39	104	469.95	18	32	798.2	486.85	18	30	937.95	410.8
18	40	104.65	471.25	18	33	798.2	485.55	18	31	932.1	415.35
18	41	104.65	471.25	18	34	799.5	485.55	18	32	926.9	417.3
18	42	105.3	469.95	18	35	803.4	485.55	18	33	922.35	419.25
18	43	105.3	469.3	18	36	805.35	484.25	18	34	917.8	421.2
18	44	106.6	468.65	18	37	807.3	483.6	18	35	914.55	425.75
18	45	106.6	466.05	18	38	807.3	486.2	18	36	913.9	429
18	46	107.25	466.7	18	39	806	490.1	18	37	910.65	430.95
18	47	107.25	465.4	18	40	800.8	492.05	18	38	903.5	433.55
19	0	548.6	527.8	18	41	800.15	491.4	18	39	897	429.65
19	1	547.95	527.15	18	42	800.8	493.35	18	40	891.8	427.05
19	2	546.65	527.8	18	43	798.2	492.7	18	41	891.15	425.1
19	3	544.05	527.15	18	44	794.95	492.05	18	42	889.85	423.8
19	4	538.2	526.5	18	45	792.35	492.05	18	43	890.5	422.5
19	5	536.25	521.95	18	46	791.05	491.4	18	44	889.85	421.85
19	6	531.05	518.7	18	47	787.8	486.85	18	45	889.85	421.85
19	7	527.8	514.15	19	0	252.2	618.8	18	46	885.95	422.5
19	8	525.85	514.15	19	1	255.45	620.1	18	47	884	421.85
19	9	522.6	512.85	19	2	255.45	617.5	19	0	741	343.85
19	10	520	514.8	19	3	258.05	616.2	19	1	740.35	345.15
19	11	516.75	515.45	19	4	258.7	617.5	19	2	741	345.8
19	12	512.2	514.8	19	5	261.3	620.75	19	3	743.6	347.1
19	13	508.3	514.15	19	6	263.9	622.7	19	4	746.2	347.75
19	14	505.05	514.8	19	7	267.15	624	19	5	748.8	349.7
19	15	505.05	516.75	19	8	272.35	626.6	19	6	749.45	351
19	16	505.05	518.7	19	9	278.85	629.85	19	7	751.4	352.3
19	17	504.4	516.75	19	10	283.4	631.8	19	8	756.6	357.5
19	18	501.8	513.5	19	11	289.25	634.4	19	9	762.45	359.45
19	19	502.45	513.5	19	12	293.8	635.05	19	10	770.25	363.35
19	20	499.85	512.85	19	13	302.9	636.35	19	13	803.4	371.15
19	21	497.25	512.85	19	14	307.45	637	19	14	809.25	369.85
19	22	495.95	510.9	19	15	312.65	637	19	15	816.4	367.9
19	23	497.25	509.6	19	16	315.25	636.35	19	16	820.3	369.85
19	24	496.6	508.95	19	17	317.85	634.4	19	17	820.95	373.1
19	25	496.6	507.65	19	18	324.35	630.5	19	18	820.3	376.35
19	26	494.65	507	19	19	326.95	627.25	19	19	817.05	375.7
19	27	491.4	505.7	19	20	327.6	624	19	20	813.15	374.4
19	28	492.7	508.3	19	21	330.85	624	19	21	810.55	373.75
19	29	521.95	533.65	19	22	301.6	633.75	19	22	809.25	373.75
19	30	523.9	533	19	23	287.3	636.35	19	23	811.2	373.1
19	31	528.45	534.95	19	24	287.3	638.3	19	24	810.55	371.15
19	32	529.75	535.6	19	25	286.65	637	19	25	809.25	373.75
19	33	529.1	535.6	19	26	289.25	635.05	19	26	806.65	377.65
19	34	527.15	534.95	19	27	291.2	635.7	19	27	806.65	382.85
19	35	520	534.95	19	28	293.15	635.7	19	28	808.6	387.4
19	36	519.35	535.6	19	29	292.5	650.65	19	29	809.9	390
19	37	517.4	539.5	19	30	287.3	659.75	19	30	812.5	391.3
19	38	512.2	540.15	19	31	283.4	663	19	31	811.85	391.95
19	39	509.6	544.05	19	32	276.25	665.6	19	32	810.55	391.95
19	40	510.25	556.4	19	33	274.95	669.5	19	33	807.95	390.65
19	41	505.7	566.15	19	34	273.65	672.1	19	34	806	387.4
19	42	499.85	575.25	19	35	269.75	670.15	19	35	804.7	386.1
19	43	495.3	573.95	19	36	265.2	670.8	19	36	804.05	383.5
19	44	495.95	568.1	19	37	260.65	670.8	19	37	802.75	380.25
19	45	493.35	566.8	19	38	254.15	670.15	19	38	802.75	373.75
19	46	490.1	563.55	19	39	243.75	670.8	19	39	803.4	369.2
19	47	488.15	560.3	19	40	237.9	666.25	19	40	804.7	362.05
20	0	952.25	530.4	19	41	233.35	663	19	41	802.75	356.85
20	1	950.3	531.7	19	42	234.65	659.75	19	42	801.45	349.7
20	2	950.3	532.35	19	44	234	643.5	19	43	802.75	343.85
20	3	950.95	535.6	19	45	232.7	632.45	19	44	804.7	337.35
20	4	949.65	537.55	19	46	234	617.5	19	45	806	332.15
20	5	949.65	538.2	19	47	235.95	614.25	19	46	802.75	328.9
20	6	950.3	543.4	20	0	336.05	635.05	19	47	800.15	327.6
20	7	948.35	543.4	20	1	343.2	642.85	20	0	490.1	350.35
20	8	947.05	538.85	20	2	347.75	650	20	1	488.8	348.4
20	9	951.6	533	20	3	353.6	653.9	20	2	484.25	347.75
20	10	950.95	532.35	20	4	359.45	661.05	20	3	480.35	345.15
20	11	954.85	524.55	20	5	368.55	666.25	20	4	477.75	341.25
20	12	962.65	515.45	20	6	378.95	681.85	20	5	469.95	331.5
20	13	960.05	514.15	20	7	391.3	697.45	20	6	474.5	326.95
20	14	963.3	507	20	8	389.35	709.8	20	7	481.65	327.6
20	15	963.95	506.35	20	9	383.5	714.35	20	8	481.65	326.3
20	16	958.75	505.7	20	10	377.65	717.6	20	9	481	323.7
20	17	957.45	504.4	20	11	377.65	719.55	20	10	476.45	319.8
20	18	963.95	513.5	20	12	378.3	719.55	20	11	474.5	315.9
20	19	961.35	510.25	20	13	377.65	720.85	20	12	473.85	312.65
20	20	962.65	511.55	20	14	373.75	721.5	20	13	477.75	315.25
20	21	960.05	509.6	20	15	371.15	728	20	14	481.65	319.15
20	22	956.8	505.7	20	16	371.15	729.3	20	15	480.35	318.5
20	23	957.45	511.55	20	17	380.25	732.55	20	16	475.8	317.2
20	24	950.95	515.45	20	18	378.95	736.45	20	17	473.85	314.6
20	25	948.35	516.1	20	19	376.35	737.1	20	18	470.6	312.65
20	26	947.7	518.05	20	20	362.7	762.45	20	19	466.7	311.35
20	27	947.05	517.4	20	21	352.95	763.1	20	20	466.05	308.1
20	28	947.7	523.25	20	22	352.3	764.4	20	21	466.05	304.85
20	29	946.4	523.9	20	23	351	763.75	20	22	458.9	300.3
20	30	947.05	529.75	20	24	349.7	755.95	20	23	453.05	298.35
20	31	944.45	534.3	20	25	349.7	752.05	20	24	448.5	304.85
20	32	941.85	536.9	20	26	355.55	748.15	20	25	460.2	315.25
20	33	938.6	539.5	20	27	364	741	20	26	469.95	321.1
20	34	934.05	542.75	20	28	368.55	734.5	20	27	475.8	324.35
20	35	931.45	546	20	29	372.45	733.2	20	28	484.9	330.85
20	36	929.5	545.35	20	30	373.75	729.95	20	29	486.85	336.7
20	37	930.15	544.05	20	31	377.65	727.35	20	30	481	342.55
20	38	933.4	538.2	20	32	383.5	731.9	20	31	474.5	347.1
20	39	932.1	538.2	20	33	382.2	742.3	20	32	454.35	351
20	40	934.7	538.85	20	34	377	742.95	20	33	453.7	350.35
20	41	934.7	533.65	20	35	375.05	740.35	20	34	463.45	351.65
20	42	934.05	524.55	20	36	377.65	741	20	35	471.9	348.4
20	43	931.45	526.5	20	37	390.65	748.8	20	36	475.8	346.45
20	44	928.85	523.25	20	38	397.8	759.2	20	37	477.75	345.15
20	45	928.2	523.9	20	39	406.25	764.4	20	38	473.85	345.8
20	46	928.2	521.95	20	40	414.05	771.55	20	39	473.85	344.5
20	47	928.85	520	20	41	417.95	776.75	20	40	475.15	346.45
21	0	1194.05	541.45	20	42	421.85	772.2	20	41	471.9	347.75
21	1	1196	540.8	20	43	417.95	768.3	20	42	464.75	352.3
21	2	1193.4	538.85	20	44	412.75	765.05	20	43	464.1	354.9
21	3	1191.45	544.05	20	45	404.3	765.05	20	44	460.2	351.65
21	4	1194.05	545.35	20	46	400.4	778.7	20	45	460.85	335.4
21	5	1195.35	547.3	20	47	398.45	786.5	20	46	462.15	330.85
21	6	1194.7	547.95	21	0	663	627.9	20	47	455.65	337.35
21	7	1194.7	554.45	21	1	663.65	629.2	21	0	616.2	362.7
21	8	1197.3	557.05	21	2	664.3	636.35	21	1	616.2	361.4
21	9	1199.9	561.6	21	3	658.45	649.35	21	2	615.55	363.35
21	10	1203.8	565.5	21	4	651.95	666.9	21	3	611.65	362.05
21	11	1203.15	564.85	21	5	649.35	677.3	21	4	612.95	364.65
21	12	1199.9	562.9	21	6	647.4	678.6	21	5	616.85	365.95
21	13	1194.7	566.8	21	7	644.8	678.6	21	6	624.65	359.45
21	14	1192.75	568.1	21	8	642.2	675.35	21	7	631.8	358.15
21	15	1190.8	566.15	21	9	638.95	668.85	21	8	635.05	359.45
21	16	1187.55	567.45	21	10	636.35	664.3	21	9	639.6	360.1
21	17	1186.25	566.15	21	11	631.15	662.35	21	10	639.6	361.4
21	18	1184.3	565.5	21	12	629.2	663.65	21	11	639.6	361.4
21	19	1181.7	565.5	21	13	626.6	662.35	21	12	642.85	360.1
21	20	1172.6	561.6	21	14	625.3	664.3	21	13	646.75	362.05
21	21	1170.65	560.95	21	15	624	666.25	21	14	645.45	365.3
21	22	1170.65	557.05	21	16	626.6	666.25	21	15	651.3	366.6
21	23	1172.6	547.95	21	17	628.55	666.25	21	16	653.25	367.25
21	24	1171.3	541.45	21	18	631.15	668.2	21	17	652.6	366.6
21	25	1172.6	534.95	21	19	638.3	667.55	21	18	655.2	367.9
21	26	1175.85	530.4	21	20	645.45	666.9	21	19	651.3	367.9
21	27	1177.8	529.75	21	21	651.3	670.15	21	20	651.3	369.85
21	28	1183	529.75	21	22	656.5	672.1	21	21	644.8	368.55
21	29	1185.6	526.5	21	23	664.3	669.5	21	22	663	375.05
21	30	1189.5	528.45	21	24	670.15	670.15	21	23	660.4	378.3
21	31	1188.85	540.15	21	25	677.3	668.85	21	24	655.85	380.9
21	32	1184.3	557.05	21	26	682.5	669.5	21	25	655.85	380.9
21	33	1180.4	560.95	21	27	688.35	666.25	21	26	652.6	383.5
21	34	1177.15	562.25	21	28	689.65	667.55	21	27	651.3	381.55
21	35	1175.2	559	21	29	685.75	665.6	21	28	649.35	382.2
21	36	1183	546.65	21	30	680.55	664.95	21	29	646.1	379.6
21	37	1184.3	542.1	21	31	676.65	666.9	21	30	639.6	377.65
21	38	1184.3	542.1	21	32	672.75	667.55	21	31	638.3	377.65
21	39	1190.15	541.45	21	33	669.5	666.25	21	32	640.25	380.25
21	40	1189.5	544.7	21	34	665.6	668.2	21	33	638.3	381.55
21	41	1197.95	545.35	21	35	663	666.9	21	34	639.6	383.5
21	42	1201.85	548.6	21	36	663	670.15	21	35	641.55	382.2
21	43	1209.65	558.35	21	37	663.65	668.85	21	36	644.8	384.15
21	44	1207.7	560.3	21	38	661.7	668.2	21	37	645.45	385.45
21	45	1200.55	557.05	21	39	659.75	666.9	21	38	645.45	388.7
21	46	1196	552.5	21	40	657.8	666.9	21	39	647.4	390.65
21	47	1194.7	553.8	21	41	651.95	672.1	21	40	639.6	389.35
22	0	1315.6	546.65	21	42	648.05	672.1	21	41	624.65	397.15
22	1	1314.95	542.75	21	43	644.8	674.05	21	42	620.75	401.05
22	2	1311.7	543.4	21	44	642.85	672.1	21	43	621.4	403
22	3	1311.7	539.5	21	45	644.8	672.75	21	44	622.05	398.45
22	4	1308.45	536.9	21	46	646.75	675.35	21	45	622.7	398.45
22	5	1308.45	535.6	21	47	644.15	679.25	21	46	627.25	393.25
22	6	1309.1	531.05	22	0	834.6	761.8	21	47	624.65	395.85
22	7	1312.35	529.75	22	1	834.6	750.75	22	0	1322.75	371.15
22	8	1311.05	529.75	22	2	839.8	742.3	22	1	1320.8	367.25
22	9	1307.8	529.75	22	3	847.6	735.15	22	2	1317.55	362.7
22	10	1310.4	528.45	22	4	848.25	735.15	22	3	1311.05	352.95
22	11	1308.45	529.1	22	5	845	732.55	22	4	1307.15	349.05
22	12	1315.6	527.8	22	6	856.05	730.6	22	5	1305.2	344.5
22	13	1322.75	525.2	22	7	855.4	727.35	22	6	1302.6	340.6
22	14	1324.05	525.2	22	8	852.8	727.35	22	7	1300.65	338
22	15	1330.55	525.85	22	9	848.9	728	22	8	1289.6	326.3
22	16	1338.35	523.9	22	10	843.7	727.35	22	9	1285.05	321.75
22	17	1343.55	522.6	22	11	840.45	731.9	22	10	1279.85	316.55
22	18	1346.8	518.05	22	12	839.8	731.9	22	11	1283.1	312.65
22	19	1350.05	512.2	22	13	836.55	740.35	22	12	1305.85	304.85
22	20	1348.75	510.25	22	14	834.6	748.15	22	13	1309.75	302.9
22	21	1346.15	508.95	22	15	836.55	759.2	22	14	1307.15	308.75
22	22	1349.4	505.05	22	16	835.25	761.15	22	15	1307.8	310.05
22	23	1353.3	501.8	22	17	833.3	759.85	22	16	1296.1	313.3
22	24	1361.75	494.65	22	18	830.05	753.35	22	17	1290.9	319.15
22	25	1368.25	490.75	22	19	830.05	751.4	22	18	1287.65	325
22	26	1376.05	485.55	22	20	828.75	748.15	22	19	1285.7	334.1
22	27	1382.55	481	22	21	828.1	742.95	22	20	1283.1	345.15
22	28	1391.65	478.4	22	22	834.6	735.8	22	21	1283.75	353.6
22	29	1392.95	477.75	22	23	834.6	733.85	22	22	1287.65	364
22	30	1392.95	476.45	22	24	835.25	734.5	22	23	1285.7	365.95
22	31	1392.3	475.8	22	25	833.95	734.5	22	24	1285.05	368.55
22	32	1390.35	473.85	22	26	833.3	737.75	22	25	1287	369.2
22	33	1385.15	473.2	22	27	833.3	737.75	22	26	1291.55	371.8
22	34	1383.85	472.55	22	28	830.7	738.4	22	27	1296.75	373.1
22	35	1383.85	471.9	22	29	829.4	740.35	22	28	1298.7	373.1
22	36	1381.25	469.95	22	30	832.65	742.3	22	29	1294.8	371.8
22	37	1382.55	470.6	22	31	837.85	736.45	22	30	1294.15	370.5
22	38	1383.2	471.25	22	32	837.85	733.2	22	31	1307.15	373.1
22	39	1384.5	471.25	22	33	838.5	735.15	22	32	1320.8	378.3
22	40	1383.2	472.55	22	34	835.9	739.05	22	33	1324.05	380.25
22	41	1383.2	473.2	22	35	835.9	740.35	22	34	1321.45	380.25
22	42	1382.55	472.55	22	36	837.2	737.75	22	35	1317.55	381.55
22	43	1383.2	473.85	22	37	836.55	737.1	22	36	1315.6	385.45
22	44	1381.9	475.8	22	38	835.9	740.35	22	37	1311.7	385.45
22	45	1376.7	477.1	22	39	836.55	739.7	22	38	1304.55	391.3
22	46	1374.75	477.1	22	40	834.6	733.2	22	39	1301.3	391.95
22	47	1374.1	479.05	22	41	838.5	733.2	22	40	1308.45	393.9
23	0	716.95	546.65	22	42	841.75	733.85	22	41	1311.7	394.55
23	1	717.6	544.05	22	43	838.5	735.15	22	42	1316.9	392.6
23	2	719.55	544.05	22	44	837.85	738.4	22	43	1321.45	393.9
23	3	720.2	542.75	22	45	838.5	744.9	22	44	1325.35	395.85
23	4	722.8	543.4	22	46	848.9	762.45	22	45	1334.45	401.05
23	5	720.85	542.1	22	47	850.85	779.35	22	46	1344.2	410.8
23	6	721.5	540.8	23	0	1343.55	728.65	22	47	1350.7	418.6
23	7	724.1	536.25	23	1	1345.5	735.15	23	0	258.05	373.75
23	8	722.8	529.75	23	2	1343.55	743.6	23	1	260	369.85
23	9	720.85	533.65	23	3	1336.4	748.15	23	2	260.65	367.9
23	10	718.25	534.95	23	4	1326	745.55	23	3	261.3	365.95
23	11	716.95	540.15	23	5	1318.2	741.65	23	4	260.65	365.3
23	12	714.35	539.5	23	6	1311.05	741.65	23	5	260.65	363.35
23	13	712.4	540.8	23	7	1303.9	738.4	23	6	258.7	362.7
23	14	721.5	540.8	23	8	1295.45	742.95	23	7	256.1	362.7
23	15	718.25	540.15	23	9	1298.05	746.85	23	8	253.5	362.7
23	16	715	538.2	23	10	1299.35	751.4	23	9	250.9	362.7
23	17	719.55	539.5	23	11	1297.4	749.45	23	10	247	362.7
23	18	716.3	539.5	23	12	1296.1	743.6	23	11	243.75	363.35
23	19	719.55	540.15	23	13	1297.4	728	23	12	237.25	365.95
23	20	715	536.9	23	14	1291.55	717.6	23	13	232.05	365.95
23	21	719.55	534.95	23	15	1290.9	712.4	23	14	228.15	365.95
23	22	720.85	537.55	23	16	1283.1	711.75	23	15	229.45	367.9
23	23	736.45	534.3	23	17	1272.7	703.95	23	16	251.55	362.7
23	24	735.15	532.35	23	18	1263.6	694.85	23	17	250.25	363.35
23	25	735.15	532.35	23	19	1283.1	689	23	18	250.9	363.35
23	26	736.45	531.05	23	20	1302.6	690.3	23	19	252.2	364
23	27	736.45	530.4	23	21	1316.25	690.3	23	20	252.85	364.65
23	28	739.7	531.05	23	22	1326.65	698.1	23	21	252.2	364.65
23	29	738.4	532.35	23	23	1325.35	706.55	23	22	252.2	364
23	30	743.6	540.15	23	24	1320.15	711.1	23	23	253.5	362.7
23	31	746.2	536.25	23	25	1310.4	711.1	23	24	255.45	364
23	32	744.9	534.95	23	26	1305.85	710.45	23	25	256.1	360.1
23	33	754.65	534.95	23	27	1301.3	705.9	23	26	252.85	358.8
23	34	752.7	534.95	23	28	1300.65	700.7	23	27	251.55	361.4
23	35	755.3	532.35	23	29	1303.9	696.15	23	28	256.1	365.95
23	36	757.9	531.05	23	30	1309.1	694.85	23	29	271.05	372.45
23	37	755.3	531.7	23	31	1322.75	693.55	23	30	274.3	377
23	38	756.6	531.05	23	32	1340.3	696.8	23	31	274.95	378.3
23	39	756.6	528.45	23	33	1354.6	705.9	23	32	274.95	380.9
23	40	752.7	531.7	23	34	1362.4	707.85	23	33	273.65	386.1
23	41	757.25	531.7	23	35	1365	703.95	23	34	274.3	391.3
23	42	755.95	534.95	23	36	1366.3	703.3	23	35	273	397.15
23	43	746.2	530.4	23	37	1368.25	711.1	23	36	273.65	402.35
23	44	748.15	525.85	23	38	1363.05	726.7	23	37	277.55	406.9
23	45	744.9	528.45	23	39	1347.45	744.25	23	38	282.1	410.15
23	46	742.95	527.15	23	40	1336.4	746.2	23	39	287.95	409.5
23	47	745.55	530.4	23	41	1333.8	748.15	23	40	291.85	404.3
24	0	1511.25	568.1	23	42	1337.05	742.95	23	41	293.8	397.8
24	1	1508	572	23	43	1336.4	744.25	23	42	295.1	392.6
24	2	1500.85	577.85	23	44	1333.15	750.75	23	43	295.1	388.05
24	3	1496.3	580.45	23	45	1328.6	744.25	23	44	293.15	381.55
24	4	1495.65	583.05	23	46	1328.6	736.45	23	45	291.85	378.3
24	5	1490.45	586.95	23	47	1329.25	739.05	23	46	286.65	370.5
24	6	1489.15	587.6	24	0	152.1	818.35	23	47	284.05	365.95
24	7	1485.9	590.85	24	1	156	811.2	24	0	809.9	370.5
24	8	1477.45	596.7	24	2	161.85	798.2	24	1	815.75	382.2
24	9	1467.05	601.9	24	3	172.9	781.95	24	2	818.35	398.45
24	10	1461.2	606.45	24	4	172.25	770.25	24	3	819.65	408.2
24	11	1455.35	609.7	24	5	174.85	761.8	24	4	822.9	418.6
24	12	1448.2	611.65	24	6	174.85	763.75	24	5	824.2	423.8
24	13	1444.3	613.6	24	7	177.45	767.65	24	6	821.6	384.8
24	14	1440.4	616.85	24	8	175.5	773.5	24	7	822.9	381.55
24	15	1436.5	618.8	24	9	178.1	777.4	24	8	826.15	380.9
24	16	1433.9	620.1	24	10	180.7	781.95	24	9	822.25	385.45
24	17	1422.2	619.45	24	11	187.2	783.9	24	10	824.2	382.2
24	18	1414.4	622.05	24	12	182.65	791.05	24	11	797.55	372.45
24	19	1411.15	623.35	24	13	152.75	811.85	24	12	820.95	380.9
24	20	1404	625.3	24	14	137.15	828.1	24	13	839.15	383.5
24	21	1404.65	625.3	24	15	131.95	828.1	24	14	854.75	382.2
24	22	1401.4	625.95	24	16	125.45	826.8	24	15	867.1	382.2
24	23	1403.35	624.65	24	17	122.85	822.9	24	16	871.65	377.65
24	24	1406.6	621.4	24	18	111.15	812.5	24	17	882.05	369.85
24	25	1405.95	622.05	24	19	102.7	815.1	24	18	882.05	369.85
24	26	1407.9	621.4	24	20	97.5	806.65	24	19	887.9	372.45
24	27	1409.85	618.8	24	21	100.1	806.65	24	20	894.4	373.1
24	28	1411.15	618.8	24	22	105.3	807.95	24	21	897.65	367.9
24	29	1413.1	616.2	24	23	107.9	809.9	24	22	887.25	367.9
24	30	1420.25	609.7	24	24	110.5	814.45	24	23	882.7	364.65
24	31	1419.6	605.8	24	25	113.1	818.35	24	24	882.05	360.75
24	32	1419.6	598.65	24	26	116.35	826.15	24	25	888.55	352.95
24	33	1422.2	595.4	24	27	122.2	830.7	24	26	888.55	348.4
24	34	1429.35	591.5	24	28	124.8	841.75	24	27	893.1	344.5
24	35	1437.8	583.05	24	29	120.9	847.6	24	28	898.3	341.9
24	36	1437.15	583.7	24	30	103.35	845.65	24	29	901.55	339.95
24	37	1439.75	582.4	24	31	98.8	843.05	24	30	904.8	338.65
24	38	1443	581.75	24	32	100.75	841.75	24	31	903.5	332.8
24	39	1448.2	579.15	24	33	103.35	837.85	24	32	895.7	330.2
24	40	1454.7	574.6	24	34	102.05	832.65	24	33	902.2	323.05
24	41	1459.9	573.3	24	35	96.2	829.4	24	34	911.3	317.2
24	42	1461.85	572.65	24	36	92.3	824.2	24	35	923.65	316.55
24	43	1463.8	571.35	24	37	94.25	820.3	24	36	928.2	332.15
24	44	1469	560.95	24	38	98.8	819	24	37	932.75	338
24	45	1475.5	554.45	24	39	101.4	817.7	24	38	943.15	339.95
24	46	1479.4	551.85	24	40	107.25	817.05	24	39	942.5	345.8
24	47	1482	551.2	24	41	111.8	820.95	24	40	942.5	349.05
25	0	408.2	631.8	24	42	117.65	821.6	24	41	943.8	352.95
25	1	407.55	631.8	24	43	126.75	817.05	24	42	948.35	369.2
25	2	404.3	633.1	24	44	132.6	815.1	24	43	951.6	369.85
25	3	400.4	632.45	24	45	134.55	812.5	24	44	954.2	351.65
25	4	401.7	632.45	24	46	134.55	817.05	24	45	965.25	327.6
25	5	400.4	632.45	24	47	134.55	820.3	24	46	964.6	316.55
25	6	400.4	633.1	25	0	1142.7	802.75	24	47	947.7	310.7
25	7	397.15	632.45	25	1	1148.55	801.45	25	0	1608.1	421.2
25	8	396.5	633.1	25	2	1157	802.1	25	1	1604.2	417.95
25	9	397.15	633.75	25	3	1156.35	800.15	25	2	1599	414.05
25	10	397.15	633.75	25	4	1151.15	793	25	3	1595.75	412.75
25	11	392.6	633.75	25	5	1154.4	796.25	25	4	1590.55	410.8
25	12	406.9	633.1	25	6	1157.65	802.1	25	5	1588.6	407.55
25	13	407.55	630.5	25	7	1159.6	806	25	6	1585.35	406.25
25	14	412.1	626.6	25	8	1157	813.15	25	7	1583.4	404.3
25	15	417.3	621.4	25	9	1153.1	812.5	25	8	1581.45	401.7
25	16	423.15	615.55	25	10	1126.45	811.2	25	9	1577.55	399.1
25	17	412.1	613.6	25	11	1127.75	811.85	25	10	1573	393.25
25	18	412.1	612.3	25	12	1127.75	812.5	25	11	1571.7	388.7
25	19	416.65	611.65	25	13	1130.35	815.75	25	12	1568.45	383.5
25	20	417.95	610.35	25	14	1131	819	25	13	1565.85	376.35
25	21	417.95	611	25	15	1134.25	819	25	14	1563.9	374.4
25	22	413.4	610.35	25	16	1132.95	815.75	25	15	1562.6	375.05
25	23	408.85	611	25	17	1133.6	816.4	25	16	1561.95	375.05
25	24	406.25	611.65	25	18	1130.35	815.1	25	17	1559.35	375.05
25	25	410.8	612.95	25	19	1138.15	824.2	25	18	1556.1	372.45
25	26	407.55	613.6	25	20	1145.95	837.2	25	19	1550.9	370.5
25	27	408.2	613.6	25	21	1147.9	843.7	25	20	1545.05	363.35
25	28	409.5	611	25	22	1153.1	848.25	25	21	1537.9	354.9
25	29	417.95	608.4	25	23	1152.45	854.1	25	22	1535.95	350.35
25	30	412.1	612.95	25	24	1153.75	865.8	25	23	1534	348.4
25	31	408.85	613.6	25	25	1153.1	869.7	25	24	1530.75	347.1
25	32	409.5	614.25	25	26	1151.15	882.7	25	25	1530.1	344.5
25	33	410.8	612.3	25	27	1153.75	886.6	25	26	1527.5	340.6
25	34	410.15	611	25	28	1162.85	894.4	25	27	1525.55	336.7
25	35	408.85	610.35	25	29	1167.4	898.95	25	28	1523.6	334.75
25	36	408.85	611	25	30	1171.3	901.55	25	29	1524.25	329.55
25	37	403.65	612.95	25	31	1179.1	900.9	25	30	1525.55	326.95
25	38	399.1	617.5	25	32	1184.3	899.6	25	31	1525.55	323.05
25	39	397.8	620.1	25	33	1192.1	900.25	25	32	1524.9	321.75
25	40	395.2	622.05	25	34	1194.05	898.3	25	33	1521.65	321.1
25	41	394.55	622.7	25	35	1197.3	888.55	25	34	1522.95	319.15
25	42	392.6	620.1	25	36	1200.55	889.85	25	35	1522.3	316.55
25	43	393.9	620.1	25	37	1201.2	891.15	25	36	1519.7	315.25
25	44	395.85	617.5	25	38	1200.55	890.5	25	37	1521.65	314.6
25	45	388.05	616.85	25	39	1200.55	888.55	25	38	1522.3	315.9
25	46	382.85	612.95	25	40	1199.9	886.6	25	39	1521	315.9
25	47	380.25	610.35	25	41	1201.2	884.65	25	40	1519.7	313.95
26	0	731.9	651.95	25	42	1201.2	886.6	25	41	1517.75	311.35
26	1	731.9	652.6	25	46	1211.6	879.45	25	42	1517.1	307.45
26	2	733.2	652.6	25	47	1231.1	866.45	25	43	1516.45	306.15
26	3	734.5	651.3	26	0	1448.85	820.95	25	44	1513.85	304.85
26	4	735.8	651.3	26	1	1452.1	816.4	25	45	1511.9	301.6
26	5	733.2	651.3	26	2	1459.25	815.1	25	46	1511.9	299.65
26	6	732.55	653.25	26	3	1463.8	813.15	25	47	1512.55	297.05
26	7	732.55	653.25	26	4	1463.8	814.45	26	0	603.85	421.85
26	8	730.6	652.6	26	5	1465.75	816.4	26	1	600.6	421.2
26	9	731.25	651.95	26	6	1465.1	820.95	26	2	599.95	421.2
26	10	730.6	649.35	26	7	1467.05	822.25	26	3	601.9	421.2
26	11	731.9	648.7	26	8	1465.1	824.2	26	4	602.55	421.2
26	12	733.85	649.35	26	9	1467.05	822.25	26	5	604.5	423.15
26	13	735.8	648.7	26	10	1469.65	821.6	26	6	603.85	426.4
26	14	733.85	648.7	26	11	1472.25	819.65	26	7	603.85	427.7
26	15	731.25	649.35	26	12	1475.5	817.05	26	8	601.25	427.05
26	16	729.95	650	26	13	1480.05	814.45	26	9	601.9	427.7
26	17	729.3	649.35	26	14	1485.25	812.5	26	10	601.9	427.05
26	18	728.65	650.65	26	15	1490.45	810.55	26	11	602.55	425.75
26	19	729.95	651.95	26	16	1498.25	807.95	26	12	599.3	426.4
26	20	728.65	651.3	26	17	1501.5	804.05	26	13	593.45	425.1
26	21	729.95	650	26	18	1504.1	802.75	26	14	594.1	425.1
26	22	729.95	649.35	26	19	1510.6	801.45	26	15	594.75	424.45
26	23	731.25	649.35	26	20	1515.15	797.55	26	16	592.8	425.75
26	24	730.6	648.7	26	21	1519.05	794.95	26	17	588.9	426.4
26	25	731.9	649.35	26	22	1521.65	791.7	26	18	583.7	428.35
26	26	732.55	650	26	23	1525.55	787.15	26	19	579.15	432.25
26	27	729.3	648.7	26	24	1528.8	784.55	26	20	576.55	436.8
26	28	728.65	648.7	26	25	1532.7	781.3	26	21	570.7	442
26	29	727.35	648.7	26	26	1534.65	778.7	26	22	564.85	445.9
26	30	726.05	648.7	26	27	1547.65	780.65	26	23	562.25	445.25
26	31	725.4	648.05	26	28	1554.8	783.25	26	24	562.25	447.2
26	32	724.75	648.05	26	29	1556.1	780.65	26	25	561.6	447.85
26	33	723.45	646.75	26	30	1559.35	776.75	26	26	560.95	447.2
26	34	724.1	646.1	26	31	1561.95	775.45	26	27	555.75	445.9
26	35	723.45	646.75	26	32	1569.1	776.75	26	28	553.15	445.9
26	36	724.1	647.4	26	33	1572.35	776.75	26	29	553.8	446.55
26	37	724.75	647.4	26	34	1575.6	777.4	26	30	549.9	449.8
26	38	724.75	647.4	26	35	1580.8	776.1	26	31	547.95	450.45
26	39	726.05	648.05	26	36	1584.7	776.75	26	32	543.4	449.15
26	40	726.7	647.4	26	37	1588.6	779.35	26	33	540.15	448.5
26	41	728.65	648.05	26	38	1587.95	780.65	26	34	533	444.6
26	42	731.25	651.3	26	39	1587.3	777.4	26	35	527.8	438.75
26	43	731.9	652.6	26	40	1584.7	779.35	26	36	520.65	435.5
26	44	727.35	651.95	26	41	1583.4	778.05	26	37	513.5	433.55
26	45	724.75	651.3	26	42	1579.5	770.9	26	38	510.25	432.25
26	46	724.75	651.3	26	43	1576.9	757.9	26	39	508.95	436.15
26	47	723.45	652.6	26	44	1576.25	754.65	26	40	509.6	439.4
27	0	574.6	708.5	26	45	1571.7	745.55	26	41	510.9	440.05
27	1	577.2	707.85	26	46	1573	741.65	26	42	513.5	441.35
27	2	576.55	705.9	26	47	1570.4	737.1	26	43	512.85	444.6
27	3	574.6	705.9	27	0	692.9	825.5	26	44	512.85	443.3
27	4	579.15	705.25	27	1	693.55	823.55	26	45	512.2	443.3
27	5	570.05	707.85	27	2	691.6	825.5	26	46	513.5	434.85
27	6	572.65	705.25	27	3	689.65	824.85	26	47	514.15	431.6
27	7	576.55	706.55	27	4	681.2	822.25	27	0	1355.9	477.1
27	8	574.6	709.8	27	5	677.95	818.35	27	1	1359.15	471.25
27	9	570.7	704.6	27	6	681.2	817.7	27	2	1359.8	464.75
27	10	572	706.55	27	7	684.45	813.15	27	3	1360.45	455.65
27	11	579.15	706.55	27	8	687.7	812.5	27	4	1365.65	454.35
27	12	572.65	704.6	27	9	691.6	806.65	27	5	1365	453.7
27	13	575.9	703.3	27	10	692.9	803.4	27	6	1365	453.7
27	14	576.55	703.3	27	11	694.2	800.8	27	7	1363.7	452.4
27	15	571.35	705.9	27	12	694.2	804.7	27	8	1361.75	448.5
27	16	574.6	707.2	27	13	703.95	813.8	27	9	1358.5	440.7
27	20	570.05	703.95	27	14	708.5	826.8	27	10	1358.5	436.8
27	21	575.9	706.55	27	15	709.15	828.1	27	11	1359.8	429
27	22	576.55	707.2	27	16	705.9	827.45	27	12	1356.55	421.2
27	23	576.55	702.65	27	17	702.65	821.6	27	13	1354.6	415.35
27	24	575.9	707.2	27	18	703.3	820.3	27	14	1350.7	406.9
27	26	575.9	705.25	27	19	702.65	820.3	27	15	1354.6	419.25
27	27	573.3	707.2	27	20	703.95	820.95	27	16	1337.7	380.9
27	28	575.25	704.6	27	21	706.55	821.6	27	17	1339.65	375.05
27	29	574.6	705.9	27	22	709.8	824.2	27	18	1352	374.4
27	30	573.95	706.55	27	23	709.8	825.5	27	19	1359.15	375.7
27	31	573.95	705.9	27	24	712.4	831.35	27	20	1359.8	372.45
27	32	574.6	702	27	25	715	832	27	21	1364.35	369.2
27	33	575.25	708.5	27	26	709.15	828.75	27	22	1366.95	366.6
27	34	575.9	702.65	27	27	707.2	824.85	27	23	1370.2	367.9
27	35	573.3	704.6	27	28	702	820.95	27	24	1367.6	366.6
27	36	575.25	705.25	27	29	698.75	819	27	25	1352	351
27	37	575.25	703.3	27	30	699.4	817.7	27	26	1355.9	338.65
27	38	575.25	704.6	27	31	702	817.05	27	27	1357.85	335.4
27	39	572	703.95	27	32	703.95	817.05	27	28	1355.9	334.1
27	40	572.65	706.55	27	33	705.9	817.05	27	29	1350.05	332.15
27	42	575.25	705.9	27	34	707.2	816.4	27	30	1350.7	330.2
27	43	577.85	706.55	27	35	709.15	817.05	27	31	1353.95	328.9
27	44	575.9	706.55	27	36	713.7	813.8	27	32	1362.4	326.95
27	45	572.65	704.6	27	37	716.95	811.2	27	33	1370.85	328.25
27	46	575.25	706.55	27	38	718.9	812.5	27	34	1376.7	328.25
27	47	575.9	705.9	27	39	717.6	813.15	27	35	1379.95	328.9
28	0	0	711.75	27	40	715	817.05	27	36	1383.85	329.55
28	1	0	716.95	27	41	713.7	820.95	27	37	1384.5	326.3
28	2	0	718.9	27	42	713.05	822.25	27	38	1385.15	323.7
28	3	0	718.25	27	43	713.05	821.6	27	39	1388.4	320.45
28	4	0	718.9	27	44	712.4	820.95	27	40	1391	315.25
28	5	0	720.2	27	45	706.55	822.9	27	41	1396.2	306.8
28	6	0	722.15	27	46	702.65	824.85	27	42	1399.45	295.75
28	7	0	721.5	27	47	700.05	828.75	27	43	1402.7	287.3
28	8	0	721.5	28	0	605.8	826.8	27	44	1404.65	280.15
28	9	0	720.2	28	1	599.95	827.45	27	45	1402.7	278.2
28	10	0	719.55	28	2	595.4	825.5	27	46	1402.05	273
28	11	0	718.25	28	3	594.75	824.85	27	47	1396.85	265.2
28	12	0	720.2	28	4	594.1	826.8	28	0	92.95	497.9
28	13	0	719.55	28	5	594.75	829.4	28	1	92.3	495.3
28	14	0	720.2	28	6	592.8	841.1	28	2	93.6	493.35
28	15	0	717.6	28	7	594.1	849.55	28	3	95.55	491.4
28	16	0	717.6	28	8	592.15	858	28	4	94.25	486.85
28	17	0	711.75	28	9	587.6	864.5	28	5	94.25	482.95
28	18	0	713.05	28	10	583.05	867.1	28	6	94.9	482.3
28	19	0	709.8	28	11	584.35	872.3	28	7	96.2	484.9
28	20	0	711.75	28	12	582.4	876.85	28	8	98.15	486.2
28	21	0	710.45	28	13	582.4	878.8	28	9	98.8	486.85
28	22	0	711.1	28	14	575.25	891.8	28	10	98.8	486.2
28	23	0	713.05	28	15	568.75	893.75	28	11	96.85	487.5
28	24	0	707.85	28	16	568.1	901.55	28	12	95.55	488.8
28	25	0	702.65	28	17	571.35	903.5	28	13	95.55	489.45
28	26	0	687.7	28	18	570.05	908.05	28	14	97.5	487.5
28	27	0	679.9	28	19	572	912.6	28	15	98.8	486.2
28	28	0	670.8	28	20	573.95	914.55	28	16	73.45	474.5
28	29	0	672.75	28	21	572.65	915.2	28	17	74.1	474.5
28	30	33.15	689	28	22	571.35	915.85	28	18	74.75	474.5
28	31	33.8	694.85	28	23	569.4	915.85	28	19	80.6	474.5
28	32	27.95	702.65	28	24	565.5	913.9	28	20	83.85	480.35
28	33	0	705.25	28	25	567.45	910	28	21	87.1	479.7
28	34	0	708.5	28	26	565.5	908.7	28	22	90.35	483.6
28	35	0	703.95	28	27	559	908.7	28	23	93.6	486.2
28	36	0	699.4	28	28	555.75	904.15	28	24	96.2	487.5
28	37	0	698.1	28	29	556.4	898.3	28	25	97.5	482.95
28	38	0	698.75	28	30	555.75	892.45	28	26	97.5	484.25
28	39	18.2	698.75	28	31	555.75	892.45	28	27	98.15	485.55
28	40	29.25	696.8	28	32	555.75	887.9	28	28	98.8	488.8
28	41	18.2	689	28	33	557.7	887.9	28	29	98.8	492.05
28	42	0	683.15	28	34	562.9	885.3	28	30	99.45	496.6
28	43	0	683.15	28	35	534.3	867.75	28	31	100.1	500.5
28	44	0	683.8	28	36	529.75	860.6	28	32	98.8	505.05
28	45	0	686.4	28	37	535.6	861.25	28	33	98.15	508.3
28	46	0	685.75	28	38	531.7	862.55	28	34	98.15	509.6
28	47	19.5	694.2	28	39	532.35	853.45	28	35	100.75	510.25
29	0	1199.25	733.85	28	40	530.4	850.2	28	36	102.7	517.4
29	1	1199.25	733.85	28	41	531.7	850.85	28	37	105.3	529.1
29	2	1193.4	731.25	28	42	531.05	851.5	28	38	111.8	539.5
29	3	1191.45	729.3	28	43	531.7	852.8	28	39	114.4	546
29	4	1192.1	730.6	28	44	532.35	851.5	28	40	115.05	549.25
29	5	1193.4	728.65	28	45	529.75	849.55	28	41	118.95	548.6
29	6	1194.05	728.65	28	46	523.25	845.65	28	42	122.2	549.9
29	7	1195.35	730.6	28	47	511.55	837.85	28	43	124.15	554.45
29	8	1196	727.35	29	0	1274	821.6	28	44	127.4	560.95
29	9	1192.1	728	29	1	1272.05	824.2	28	45	128.7	564.85
29	10	1193.4	728	29	2	1266.2	830.7	28	46	129.35	569.4
29	11	1188.85	734.5	29	3	1262.3	835.25	28	47	128.7	573.95
29	12	1183.65	731.9	29	4	1262.3	835.9	29	0	913.25	547.3
29	13	1179.75	735.8	29	5	1243.45	850.85	29	1	916.5	542.75
29	14	1179.1	736.45	29	6	1243.45	854.1	29	2	918.45	535.6
29	17	1166.1	742.3	29	7	1240.85	854.75	29	3	919.75	529.75
29	18	1156.35	740.35	29	8	1241.5	854.75	29	4	923	520.65
29	19	1151.8	741	29	9	1238.25	852.8	29	5	924.95	515.45
29	20	1147.9	741.65	29	10	1247.35	847.6	29	6	924.95	512.2
29	21	1144.65	744.25	29	11	1257.75	838.5	29	7	926.25	508.3
29	22	1140.75	746.85	29	12	1262.95	829.4	29	8	929.5	501.8
29	23	1136.2	754	29	13	1270.75	820.95	29	9	934.7	491.4
29	24	1132.95	761.15	29	14	1276.6	817.7	29	10	946.4	483.6
29	25	1131.65	771.55	29	15	1287.65	812.5	29	11	954.2	480.35
29	26	1129.7	770.25	29	16	1296.1	811.2	29	12	955.5	479.05
29	27	1126.45	763.75	29	17	1303.25	810.55	29	13	956.15	479.7
29	28	1122.55	764.4	29	18	1310.4	808.6	29	14	956.8	479.05
29	29	1112.15	766.35	29	19	1317.55	807.3	29	15	958.1	481
29	30	1103.05	770.9	29	20	1333.15	807.95	29	16	954.85	484.25
29	31	1098.5	775.45	29	21	1335.75	801.45	29	17	954.85	488.8
29	32	1099.8	776.1	29	22	1346.15	789.75	29	18	954.2	492.05
29	33	1101.1	775.45	29	23	1353.95	793	29	19	954.85	492.7
29	34	1103.05	776.1	29	24	1355.9	794.95	29	20	956.8	499.2
29	35	1104.35	776.75	29	25	1353.3	800.15	29	21	958.1	506.35
29	36	1103.7	783.25	29	26	1353.95	804.05	29	22	958.75	512.2
29	37	1104.35	785.2	29	27	1358.5	804.7	29	23	958.1	513.5
29	38	1103.05	789.75	29	28	1359.15	807.3	29	24	956.8	512.85
29	39	1101.1	791.05	29	29	1359.8	805.35	29	25	958.75	508.3
29	40	1103.7	790.4	29	30	1357.2	804.7	29	26	965.25	508.3
29	41	1102.4	789.1	29	31	1361.1	802.75	29	27	969.8	497.9
29	42	1103.7	789.1	29	32	1364.35	806	29	28	972.4	496.6
29	43	1103.7	789.1	29	33	1376.05	808.6	29	29	972.4	495.3
29	44	1105	785.85	29	34	1379.3	809.9	29	30	986.7	495.3
29	45	1106.3	785.2	29	35	1379.95	809.9	29	31	995.15	499.2
29	46	1106.3	784.55	29	36	1381.9	809.25	29	32	997.75	501.15
29	47	1104.35	783.9	29	37	1387.1	807.95	29	33	999.05	504.4
30	0	838.5	772.2	29	38	1393.6	803.4	29	34	1002.3	505.05
30	1	837.2	768.95	29	40	1420.25	801.45	29	35	1006.85	503.1
30	2	835.9	767.65	29	41	1427.4	802.1	29	36	1006.2	505.05
30	3	835.25	765.05	29	42	1431.3	803.4	29	37	1005.55	505.05
30	4	832.65	761.8	29	43	1431.95	804.05	29	38	1002.95	507
30	5	831.35	757.9	29	44	1435.2	804.7	29	39	1001	507
30	6	830.7	755.95	29	45	1437.15	804.05	29	40	991.25	510.25
30	7	828.75	753.35	29	46	1436.5	804.05	29	41	986.05	514.8
30	8	828.75	750.75	29	47	1432.6	802.75	29	42	982.8	519.35
30	9	829.4	752.05	30	0	185.9	874.9	29	43	982.8	521.95
30	10	829.4	750.75	30	1	183.3	878.15	29	44	981.5	529.75
30	11	830.05	751.4	30	2	182	879.45	29	45	976.95	551.2
30	12	831.35	755.3	30	3	183.3	877.5	29	46	965.9	564.85
30	13	831.35	753.35	30	4	182	880.1	29	47	963.3	570.05
30	14	833.3	756.6	30	5	185.25	882.05	30	0	398.45	561.6
30	15	835.25	757.9	30	6	185.25	890.5	30	1	397.8	562.9
30	16	836.55	759.85	30	7	184.6	897	30	2	400.4	561.6
30	17	837.85	758.55	30	8	186.55	902.85	30	3	399.75	562.9
30	18	840.45	763.1	30	9	186.55	906.1	30	4	398.45	564.85
30	19	841.1	762.45	30	10	185.25	908.05	30	5	402.35	565.5
30	20	843.05	761.8	30	11	184.6	910	30	6	405.6	567.45
30	21	847.6	767	30	12	187.2	915.2	30	7	407.55	573.95
30	22	847.6	765.7	30	13	191.75	924.3	30	8	407.55	579.8
30	23	848.9	763.75	30	14	195.65	923	30	9	407.55	579.8
30	24	850.85	767	30	15	199.55	923	30	10	406.25	582.4
30	25	852.15	765.7	30	16	202.8	923.65	30	11	404.95	585
30	26	853.45	767	30	17	206.05	923.65	30	12	403.65	588.25
30	27	856.05	768.3	30	18	210.6	921.7	30	13	399.75	590.2
30	28	856.7	768.95	30	19	215.15	919.75	30	14	396.5	593.45
30	29	859.95	772.2	30	20	221	889.85	30	15	393.9	594.75
30	30	861.9	776.1	30	21	221	898.3	30	16	392.6	594.75
30	31	863.85	779.35	30	22	221	889.2	30	17	390	590.85
30	32	864.5	781.3	30	23	217.75	885.95	30	18	391.3	588.9
30	33	865.15	783.9	30	24	214.5	885.3	30	19	393.25	585.65
30	34	863.85	783.25	30	25	213.85	882.7	30	20	394.55	583.05
30	35	863.2	789.1	30	26	210.6	882.7	30	21	398.45	579.8
30	36	859.95	790.4	30	27	211.25	881.4	30	22	399.1	573.95
30	37	860.6	787.8	30	28	215.15	884	30	23	390	566.15
30	38	862.55	784.55	30	29	206.05	880.75	30	24	386.1	562.25
30	39	864.5	783.9	30	30	204.75	874.25	30	25	384.15	562.25
30	40	863.85	787.8	30	31	196.95	865.8	30	26	382.2	563.55
30	41	862.55	790.4	30	32	193.05	861.25	30	27	382.2	561.6
30	42	864.5	789.75	30	33	190.45	852.15	30	28	383.5	561.6
30	43	867.75	803.4	30	34	190.45	847.6	30	29	382.85	560.3
30	44	865.8	823.55	30	35	195	834.6	30	30	380.9	555.1
30	45	862.55	837.85	30	36	199.55	826.8	30	31	380.25	556.4
30	46	860.6	845.65	30	37	199.55	824.85	30	32	380.25	559
30	47	855.4	848.9	30	38	198.25	820.3	30	33	383.5	559
31	0	1175.85	796.9	30	39	209.95	812.5	30	34	390	560.95
31	1	1175.2	796.25	30	40	210.6	800.8	30	35	390	560.3
31	2	1176.5	795.6	30	41	209.3	792.35	30	36	390.65	560.3
31	3	1184.3	791.05	30	42	207.35	789.1	30	37	397.15	560.3
31	4	1179.75	787.8	30	43	203.45	787.15	30	38	401.7	562.9
31	5	1182.35	789.75	30	44	203.45	783.25	30	39	409.5	550.55
31	6	1184.3	794.3	30	45	200.85	783.9	30	40	410.8	542.75
31	7	1181.7	792.35	30	46	193.7	786.5	30	41	416	547.3
31	8	1183	789.75	30	47	187.85	789.1	30	42	415.35	552.5
31	9	1186.9	787.15	31	0	68.9	900.9	30	43	413.4	556.4
31	10	1186.9	785.85	31	1	68.25	897	30	44	410.8	556.4
31	11	1199.25	783.25	31	2	65	900.9	30	45	407.55	553.8
31	12	1207.05	781.95	31	3	64.35	900.9	30	46	402.35	552.5
31	13	1210.3	778.05	31	4	63.05	903.5	30	47	397.15	549.9
31	14	1208.35	776.75	31	5	57.85	902.85	31	0	1502.8	579.15
31	15	1201.2	767.65	31	6	55.25	902.85	31	1	1500.2	581.1
31	16	1208.35	767.65	31	7	53.3	900.9	31	2	1498.9	578.5
31	17	1220.7	766.35	31	8	59.15	905.45	31	3	1500.85	575.9
31	18	1223.3	764.4	31	9	69.55	917.8	31	4	1508	573.95
31	19	1225.9	760.5	31	10	75.4	925.6	31	5	1511.25	586.95
31	20	1227.2	757.25	31	11	78	928.85	31	6	1514.5	588.9
31	21	1229.8	752.7	31	12	78	926.9	31	7	1515.8	588.9
31	22	1230.45	749.45	31	13	75.4	927.55	31	8	1519.05	596.7
31	23	1230.45	746.2	31	14	73.45	933.4	31	9	1518.4	605.15
31	24	1230.45	742.3	31	15	69.55	942.5	31	10	1504.1	614.9
31	25	1229.8	737.1	31	16	68.25	943.8	31	11	1497.6	618.8
31	26	1231.1	729.3	31	17	68.25	939.9	31	12	1496.3	625.3
31	27	1229.8	723.45	31	18	65.65	939.25	31	13	1488.5	629.85
31	28	1231.1	718.9	31	19	64.35	940.55	31	14	1480.05	625.95
31	29	1232.4	715	31	20	63.7	944.45	31	15	1476.8	626.6
31	30	1233.7	714.35	31	21	62.4	945.75	31	16	1470.3	631.15
31	31	1233.7	714.35	31	22	61.1	941.85	31	17	1473.55	646.75
31	32	1232.4	716.3	31	23	61.1	943.15	31	18	1491.75	642.2
31	33	1231.75	713.7	31	24	64.35	947.05	31	19	1497.6	625.3
31	34	1231.1	709.15	31	25	66.3	951.6	31	20	1486.55	616.2
31	35	1228.5	705.9	31	26	66.95	954.2	31	21	1478.1	614.9
31	36	1228.5	702.65	31	27	66.3	956.8	31	22	1474.85	614.9
31	37	1227.2	699.4	31	28	64.35	956.8	31	23	1478.75	613.6
31	38	1223.95	698.75	31	29	59.15	959.4	31	24	1491.1	611
31	39	1219.4	700.7	31	30	54.6	952.9	31	25	1496.95	614.9
31	40	1216.15	702	31	31	57.2	952.25	31	26	1491.75	631.15
31	41	1212.25	705.9	31	32	59.15	952.9	31	27	1492.4	629.85
31	42	1210.95	709.15	31	33	67.6	975.65	31	28	1489.8	625.95
31	43	1205.75	715.65	31	34	71.5	979.55	31	29	1493.7	618.8
31	44	1199.25	722.15	31	35	77.35	975.65	31	30	1501.5	613.6
31	45	1196	729.3	31	36	74.1	973.05	31	31	1509.3	607.1
31	46	1197.95	735.15	31	37	66.95	969.8	31	32	1501.5	616.2
31	47	1197.95	742.3	31	38	61.1	969.15	31	33	1500.2	620.1
32	0	917.15	796.9	31	39	59.8	969.15	31	34	1501.5	626.6
32	1	915.2	797.55	31	40	59.15	970.45	31	35	1502.15	628.55
32	2	911.95	796.9	31	41	57.2	970.45	31	36	1506.05	629.85
32	3	908.05	796.25	31	42	53.95	960.05	31	37	1506.05	635.05
32	4	903.5	793	31	43	51.35	958.1	31	38	1506.05	644.8
32	5	901.55	789.1	31	44	48.75	951.6	31	39	1504.75	650
32	6	899.6	786.5	31	45	42.25	953.55	31	40	1495	651.3
32	7	899.6	785.85	31	46	42.25	952.9	31	41	1498.9	653.9
32	8	897.65	785.85	31	47	41.6	950.3	31	42	1498.25	653.9
32	9	898.3	785.85	32	0	708.5	941.85	31	43	1495.65	653.25
32	10	898.3	784.55	32	1	705.9	944.45	31	44	1500.2	651.95
32	11	898.3	785.85	32	2	697.45	949	31	45	1503.45	651.3
32	12	900.25	783.9	32	3	692.25	949.65	31	46	1503.45	650
32	13	901.55	783.25	32	4	686.4	949	31	47	1511.25	654.55
32	14	902.2	782.6	32	5	682.5	951.6	32	0	1097.85	585
32	15	901.55	785.85	32	6	683.15	951.6	32	1	1103.7	586.95
32	16	900.9	785.85	32	7	685.75	949	32	2	1103.05	587.6
32	17	900.9	781.95	32	8	686.4	946.4	32	3	1099.8	586.3
32	18	902.2	777.4	32	9	687.7	942.5	32	4	1094.6	581.1
32	19	904.15	772.85	32	10	684.45	941.2	32	5	1082.9	567.45
32	20	906.1	770.25	32	11	683.15	941.2	32	6	1076.4	558.35
32	21	909.35	768.3	32	12	687.05	939.9	32	7	1075.75	551.85
32	22	912.6	767	32	13	685.1	936.65	32	8	1071.85	552.5
32	23	917.15	767	32	14	682.5	938.6	32	9	1069.25	562.25
32	24	921.05	768.3	32	15	681.85	936.65	32	10	1065.35	571.35
32	25	924.3	767.65	32	16	680.55	934.7	32	11	1069.9	577.85
32	26	927.55	768.3	32	17	682.5	928.85	32	12	1075.1	584.35
32	27	930.8	768.95	32	18	683.8	930.8	32	13	1077.7	586.3
32	28	934.7	769.6	32	19	688.35	929.5	32	14	1075.75	581.75
32	29	937.95	770.9	32	20	698.75	930.15	32	15	1075.75	577.85
32	30	939.9	772.2	32	22	722.15	937.3	32	16	1073.15	572
32	31	943.15	772.2	32	23	725.4	943.15	32	17	1069.9	568.75
32	32	947.05	772.85	32	24	724.75	941.2	32	18	1064.05	562.9
32	33	947.7	775.45	32	25	727.35	936.65	32	19	1054.95	553.15
32	34	947.05	775.45	32	26	726.7	943.15	32	20	1051.7	547.95
32	35	943.15	775.45	32	27	722.15	942.5	32	21	1047.8	541.45
32	36	942.5	776.75	32	28	702	941.2	32	22	1041.95	542.75
32	37	941.85	777.4	32	29	697.45	932.1	32	23	1041.3	546.65
32	38	943.15	780.65	32	30	700.05	929.5	32	24	1042.6	551.2
32	39	945.1	780.65	32	31	709.8	928.85	32	25	1041.95	557.7
32	40	946.4	780.65	32	32	715.65	930.8	32	26	1039.35	567.45
32	41	945.75	780	32	33	719.55	934.05	32	27	1041.95	577.2
32	42	947.7	783.9	32	34	718.9	934.7	32	28	1044.55	588.25
32	43	947.05	783.9	32	35	713.05	933.4	32	29	1044.55	596.05
32	44	945.1	785.85	32	36	707.85	935.35	32	30	1045.85	605.15
32	45	944.45	789.1	32	37	705.9	932.75	32	31	1049.1	611
32	46	944.45	791.7	32	38	717.6	943.8	32	32	1053	619.45
32	47	942.5	793.65	32	39	709.8	944.45	32	33	1057.55	624
33	0	795.6	829.4	32	40	705.25	950.3	32	34	1062.75	625.3
33	1	791.05	828.1	32	41	700.7	951.6	32	35	1065.35	620.75
33	2	787.8	828.1	32	42	701.35	958.1	32	36	1067.95	622.05
33	3	786.5	826.8	32	43	697.45	960.05	32	37	1073.8	618.8
33	4	783.9	826.8	32	44	685.75	966.55	32	38	1079.65	616.85
33	5	782.6	826.8	32	45	682.5	975.65	32	39	1084.2	612.95
33	6	779.35	827.45	32	46	680.55	978.25	32	40	1095.9	607.1
33	7	776.75	825.5	32	47	674.05	984.1	32	41	1110.85	599.3
33	8	772.2	823.55	33	0	1323.4	1032.2	32	43	1097.85	596.7
33	9	770.9	825.5	33	1	1327.95	1029.6	32	44	1087.45	588.9
33	10	768.3	819.65	33	2	1331.85	1028.3	32	45	1080.3	582.4
33	11	767.65	819	33	3	1336.4	1027	32	46	1071.85	566.8
33	12	763.1	815.1	33	4	1337.7	1025.05	32	47	1070.55	554.45
33	13	760.5	809.9	33	5	1340.3	1023.75	33	0	212.55	625.95
33	14	755.95	806	33	6	1342.9	1024.4	33	1	209.3	625.3
33	15	752.05	801.45	33	7	1346.8	1023.75	33	2	208	627.25
33	16	750.75	800.15	33	8	1349.4	1024.4	33	3	206.7	628.55
33	17	750.1	797.55	33	9	1352	1026.35	33	4	206.05	630.5
33	18	750.75	797.55	33	10	1354.6	1028.3	33	5	206.05	631.15
33	19	750.75	797.55	33	11	1361.1	1028.95	33	6	211.25	633.1
33	20	748.8	796.25	33	12	1365.65	1028.95	33	7	215.8	639.6
33	21	745.55	794.3	33	13	1372.8	1026.35	33	8	222.3	644.15
33	22	742.95	793.65	33	14	1380.6	1023.1	33	9	226.85	651.3
33	23	742.95	793.65	33	15	1384.5	1020.5	33	10	225.55	655.85
33	24	741	793	33	16	1385.15	1021.15	33	11	226.85	660.4
33	25	740.35	792.35	33	17	1391	1023.75	33	12	228.15	661.7
33	26	739.7	793	33	18	1401.4	1030.25	33	13	235.3	664.95
33	27	739.7	793	33	19	1410.5	1031.55	33	14	239.85	668.2
33	28	739.7	795.6	33	20	1413.75	1032.2	33	15	249.6	676
33	29	741	796.25	33	21	1415.7	1032.85	33	16	259.35	683.15
33	30	744.9	795.6	33	22	1422.2	1032.85	33	17	270.4	687.7
33	31	746.85	793.65	33	23	1428.05	1031.55	33	18	276.9	691.6
33	32	750.1	792.35	33	24	1430.65	1029.6	33	19	282.1	694.2
33	33	754.65	788.45	33	25	1429.35	1030.25	33	20	285.35	696.8
33	34	757.9	785.85	33	26	1429.35	1030.25	33	21	295.1	702.65
33	35	761.15	785.85	33	27	1430.65	1027.65	33	22	298.35	713.7
33	36	765.05	785.85	33	28	1429.35	1027.65	33	23	300.95	716.3
33	37	768.3	781.95	33	29	1427.4	1024.4	33	24	304.2	720.2
33	38	769.6	783.9	33	30	1428.05	1023.75	33	25	305.5	715
33	39	770.9	783.9	33	31	1431.3	1023.1	33	26	302.9	716.3
33	40	770.25	785.2	33	32	1435.2	1022.45	33	27	304.85	718.25
33	41	769.6	783.9	33	33	1435.85	1020.5	33	28	310.7	728.65
33	42	769.6	783.25	33	34	1437.8	1018.55	33	29	316.55	730.6
33	43	769.6	782.6	33	35	1439.75	1015.95	33	30	318.5	731.9
33	44	767	782.6	33	36	1441.05	1015.3	33	31	319.8	729.3
33	45	765.7	783.25	33	37	1444.3	1013.35	33	32	318.5	726.05
33	46	766.35	781.95	33	38	1444.95	1012.7	33	33	315.25	722.8
33	47	765.05	781.95	33	39	1451.45	1012.7	33	34	313.3	720.2
34	0	474.5	837.85	33	40	1455.35	1010.1	33	35	302.9	713.05
34	1	473.2	835.9	33	41	1457.3	1009.45	33	36	298.35	709.8
34	2	472.55	835.9	33	42	1460.55	1009.45	33	37	295.75	709.15
34	3	473.2	833.95	33	43	1464.45	1009.45	33	38	294.45	707.85
34	4	473.2	833.95	33	44	1467.05	1008.15	33	39	293.8	705.9
34	5	472.55	832	33	45	1469.65	1006.85	33	40	295.1	703.3
34	6	473.2	833.3	33	46	1470.95	1006.85	33	41	294.45	699.4
34	7	474.5	833.95	33	47	1474.85	1004.9	33	42	294.45	695.5
34	8	473.2	835.25	34	0	278.2	1089.4	33	43	294.45	689.65
34	9	472.55	833.3	34	1	278.2	1089.4	33	44	296.4	683.15
34	10	471.25	834.6	34	2	278.2	1089.4	33	45	300.95	681.85
34	11	471.9	835.25	34	3	273	1084.85	33	46	304.2	683.15
34	12	472.55	835.9	34	4	263.9	1081.6	33	47	306.15	684.45
34	13	472.55	835.9	34	5	257.4	1075.1	34	0	145.6	640.25
34	14	473.85	837.2	34	6	252.2	1071.85	34	1	141.05	637
34	15	473.85	838.5	34	7	250.25	1069.9	34	2	137.8	638.3
34	16	474.5	839.15	34	8	245.7	1066	34	3	139.75	637.65
34	17	474.5	839.15	34	9	241.8	1063.4	34	4	139.75	636.35
34	18	473.2	839.8	34	10	237.25	1058.85	34	5	139.75	633.1
34	19	470.6	837.85	34	11	231.4	1055.6	34	6	138.45	632.45
34	20	469.95	837.85	34	12	226.2	1047.15	34	7	137.15	628.55
34	21	468.65	837.85	34	13	219.7	1048.45	34	8	136.5	626.6
34	22	470.6	836.55	34	14	215.15	1052.35	34	9	137.15	623.35
34	23	469.3	835.9	34	15	209.3	1057.55	34	10	136.5	619.45
34	24	471.25	835.25	34	16	202.15	1059.5	34	11	135.2	611
34	25	471.9	835.25	34	17	190.45	1056.9	34	12	134.55	607.1
34	26	470.6	834.6	34	18	187.2	1054.3	34	13	135.85	603.2
34	27	469.95	832.65	34	19	183.95	1053	34	14	137.8	600.6
34	28	471.9	830.7	34	20	182.65	1051.05	34	15	141.05	598
34	29	473.2	828.1	34	21	184.6	1054.95	34	16	146.25	597.35
34	30	472.55	824.2	34	22	184.6	1059.5	34	17	152.75	598
34	31	468	826.8	34	23	184.6	1066	34	18	161.2	599.3
34	32	473.85	829.4	34	24	183.3	1077.05	34	19	170.95	601.9
34	33	474.5	830.7	34	25	183.3	1082.25	34	20	178.1	603.85
34	34	473.85	830.7	34	26	178.1	1086.8	34	21	187.2	606.45
34	35	471.25	832	34	27	170.95	1088.75	34	22	191.75	612.95
34	36	466.05	832	34	28	157.95	1096.55	34	23	194.35	613.6
34	37	464.1	832	34	29	148.2	1103.7	34	24	197.6	616.2
34	38	462.15	832.65	34	30	140.4	1112.8	34	25	196.95	616.2
34	39	460.2	835.25	34	31	136.5	1115.4	34	26	198.25	616.2
34	40	457.6	837.2	34	32	135.85	1113.45	34	27	197.6	619.45
34	41	456.3	841.1	34	33	137.15	1111.5	34	28	195.65	618.8
34	42	454.35	841.1	34	34	138.45	1110.85	34	29	195	620.1
34	43	451.75	843.7	34	35	141.7	1109.55	34	30	195	618.8
34	44	449.8	849.55	34	36	143.65	1110.2	34	31	193.05	616.2
34	45	446.55	850.2	34	37	143	1111.5	34	32	193.7	616.2
34	46	443.3	852.15	34	38	142.35	1114.75	34	33	194.35	614.9
34	47	440.05	854.75	34	39	143.65	1118.65	34	34	196.3	615.55
35	0	1001	863.85	34	40	144.3	1122.55	34	35	198.9	614.25
35	1	997.75	862.55	34	41	148.85	1122.55	34	36	199.55	614.9
35	2	995.8	862.55	34	42	180.05	1103.7	34	37	202.8	614.9
35	3	995.15	858	34	43	183.3	1108.25	34	38	204.75	614.9
35	4	993.2	854.1	34	44	187.85	1093.3	34	39	206.7	614.9
35	5	992.55	850.85	34	45	178.75	1082.25	34	40	207.35	612.3
35	6	993.85	847.6	34	46	181.35	1073.8	34	41	209.95	611
35	7	996.45	847.6	34	47	179.4	1072.5	34	42	211.25	608.4
35	8	999.05	847.6	35	0	1384.5	1134.25	34	43	217.1	607.1
35	9	1002.3	852.8	35	1	1379.3	1134.9	34	44	218.4	605.15
35	10	1002.3	855.4	35	2	1373.45	1138.8	34	45	221	604.5
35	11	1002.95	858	35	3	1370.2	1140.1	34	46	225.55	604.5
35	12	999.05	858	35	4	1366.3	1142.05	34	47	228.15	602.55
35	13	1001	864.5	35	5	1364.35	1141.4	35	0	565.5	635.7
35	14	1002.3	859.3	35	6	1359.8	1142.7	35	1	565.5	637
35	15	1002.3	859.3	35	7	1354.6	1141.4	35	2	566.15	638.3
35	16	1002.3	859.95	35	8	1350.05	1142.05	35	3	566.8	633.75
35	17	1001.65	862.55	35	9	1347.45	1140.1	35	4	564.2	631.15
35	18	999.05	863.2	35	10	1340.95	1134.25	35	5	564.2	627.9
35	19	994.5	866.45	35	11	1340.95	1132.3	35	6	568.75	621.4
35	20	991.9	878.8	35	12	1340.95	1129.05	35	7	573.3	620.1
35	21	984.1	894.4	35	13	1344.2	1126.45	35	8	578.5	623.35
35	22	979.55	900.25	35	14	1344.2	1123.85	35	9	577.85	624
35	23	979.55	902.2	35	15	1355.9	1132.95	35	10	580.45	624
35	24	987.35	908.05	35	16	1359.15	1131	35	11	583.7	624
35	25	993.2	906.75	35	17	1359.15	1130.35	35	12	585	623.35
35	26	1010.1	915.85	35	18	1364.35	1130.35	35	13	586.95	621.4
35	27	1015.95	921.7	35	19	1364.35	1128.4	35	14	590.85	615.55
35	28	1016.6	924.3	35	20	1364.35	1125.15	35	15	598.65	611.65
35	29	1015.3	927.55	35	21	1363.7	1118.65	35	16	599.95	612.3
35	30	1012.05	927.55	35	22	1374.1	1114.75	35	17	599.3	610.35
35	31	1007.5	924.95	35	23	1374.75	1112.15	35	18	599.95	608.4
35	32	1004.9	924.3	35	24	1377.35	1115.4	35	19	602.55	605.8
35	33	1004.9	922.35	35	25	1376.7	1116.7	35	20	603.85	602.55
35	34	1000.35	920.4	35	26	1373.45	1114.1	35	21	604.5	597.35
35	35	995.15	923.65	35	27	1366.3	1109.55	35	22	607.1	593.45
35	36	989.95	926.9	35	28	1359.8	1099.15	35	23	607.1	589.55
35	37	984.1	919.1	35	29	1357.2	1093.3	35	24	608.4	586.95
35	40	978.25	896.35	35	30	1360.45	1093.95	35	25	610.35	584.35
35	41	971.1	890.5	35	31	1370.85	1090.05	35	26	608.4	581.1
35	42	973.7	885.95	35	32	1373.45	1088.75	35	27	609.7	579.15
35	43	967.85	872.95	35	33	1376.7	1084.85	35	28	607.1	575.25
35	44	976.3	871.65	35	34	1378.65	1071.85	35	29	608.4	574.6
35	45	987.35	869.7	35	35	1375.4	1062.75	35	30	620.1	574.6
35	46	999.05	888.55	35	36	1365	1056.25	35	31	629.85	568.75
35	47	1003.6	886.6	35	37	1359.8	1053	35	32	622.05	575.9
36	0	1119.3	921.05	35	38	1354.6	1054.95	35	33	616.2	577.2
36	1	1121.25	921.05	35	39	1355.9	1054.3	35	34	615.55	575.25
36	2	1120.6	924.3	35	40	1357.2	1051.05	35	35	625.3	559
36	3	1118.65	925.6	35	41	1360.45	1046.5	35	36	622.05	559.65
36	4	1117.35	923.65	35	42	1365.65	1040.65	35	37	618.15	536.25
36	5	1116.7	924.95	35	43	1370.2	1034.8	35	38	611.65	536.9
36	6	1116.05	923	35	44	1378.65	1033.5	35	39	610.35	553.8
36	7	1118	919.75	35	45	1382.55	1032.2	35	40	603.85	557.7
36	8	1119.3	917.8	35	46	1386.45	1031.55	35	41	593.45	555.75
36	9	1120.6	915.85	35	47	1387.75	1033.5	35	42	585.65	554.45
36	10	1121.25	916.5	36	0	1028.95	1156.35	35	43	579.15	556.4
36	11	1120.6	915.85	36	1	1030.25	1158.3	35	44	572.65	557.7
36	12	1119.95	919.1	36	2	1031.55	1159.6	35	45	569.4	553.15
36	13	1118.65	917.8	36	3	1032.85	1162.85	35	46	553.15	551.2
36	14	1118.65	919.1	36	4	1035.45	1167.4	35	47	547.3	555.1
36	15	1118	919.1	36	5	1038.05	1178.45	36	0	1237.6	640.9
36	16	1117.35	918.45	36	6	1040	1183.65	36	1	1236.95	637
36	17	1115.4	917.8	36	7	1044.55	1186.9	36	2	1243.45	632.45
36	18	1113.45	917.8	36	8	1049.75	1190.8	36	3	1248.65	627.25
36	19	1110.2	913.25	36	9	1055.6	1192.75	36	4	1249.95	614.25
36	20	1112.15	913.9	36	10	1066	1195.35	36	5	1249.3	609.7
36	21	1112.8	913.25	36	11	1073.8	1197.3	36	6	1251.9	608.4
36	22	1106.95	902.85	36	12	1084.2	1205.75	36	7	1250.6	607.1
36	23	1110.2	906.1	36	13	1088.75	1211.6	36	8	1251.25	606.45
36	24	1110.85	910.65	36	14	1091.35	1218.75	36	9	1249.3	602.55
36	25	1110.85	911.95	36	15	1095.9	1222.65	36	10	1246.7	599.3
36	26	1113.45	910.65	36	16	1094.6	1229.15	36	11	1247.35	597.35
36	27	1114.1	911.3	36	17	1093.3	1225.9	36	12	1246.7	592.8
36	28	1115.4	910	36	18	1097.2	1218.75	36	13	1248.65	590.85
36	29	1116.7	909.35	36	19	1098.5	1216.8	36	14	1247.35	591.5
36	30	1118.65	906.75	36	20	1100.45	1211.6	36	15	1251.9	588.9
36	31	1117.35	904.8	36	21	1100.45	1207.7	36	16	1249.95	586.95
36	32	1112.8	903.5	36	22	1103.7	1203.15	36	17	1236.3	588.25
36	33	1104.35	902.85	36	23	1110.85	1179.75	36	18	1234.35	590.2
36	34	1099.8	903.5	36	24	1114.1	1175.85	36	19	1235.65	592.15
36	35	1093.3	903.5	36	25	1120.6	1170	36	20	1234.35	586.95
36	36	1088.75	904.8	36	26	1127.1	1169.35	36	21	1236.3	586.95
36	37	1090.05	899.6	36	27	1132.95	1167.4	36	22	1235.65	590.85
36	38	1084.85	897.65	36	28	1137.5	1170	36	23	1227.85	594.75
36	39	1080.3	887.9	36	29	1141.4	1179.1	36	24	1217.45	601.9
36	40	1073.15	882.05	36	30	1144.65	1186.25	36	25	1212.25	601.9
36	41	1059.5	869.7	36	31	1144	1187.55	36	26	1210.3	604.5
36	42	1051.7	866.45	36	32	1142.05	1185.6	36	27	1209	612.95
36	43	1052.35	867.75	36	33	1145.3	1188.2	36	28	1204.45	620.1
36	44	1053	866.45	36	34	1151.8	1186.9	36	29	1203.15	624
36	45	1056.25	864.5	36	35	1153.75	1190.15	36	30	1201.85	625.3
36	46	1058.2	863.85	36	36	1157	1188.2	36	31	1197.95	626.6
36	47	1060.8	865.8	36	37	1161.55	1186.9	36	32	1192.75	631.15
37	0	2.6	940.55	36	38	1164.8	1183.65	36	33	1203.15	622.05
37	1	11.7	928.85	36	39	1167.4	1182.35	36	34	1202.5	621.4
37	2	26.65	923	36	40	1168.05	1180.4	36	35	1201.2	619.45
37	3	29.9	913.9	36	41	1170	1176.5	36	36	1201.85	620.1
37	4	31.85	910.65	36	42	1175.2	1159.6	36	37	1201.85	618.8
37	5	28.6	902.2	36	43	1183.65	1153.75	36	38	1197.3	618.15
37	6	25.35	899.6	36	44	1186.25	1147.25	36	39	1201.2	618.15
37	7	34.45	900.9	36	45	1185.6	1142.05	36	40	1189.5	623.35
37	8	37.7	904.15	36	46	1184.95	1139.45	36	41	1190.15	624
37	9	40.95	906.1	36	47	1185.6	1136.2	36	42	1176.5	630.5
37	10	46.15	908.7	37	0	915.85	1192.75	36	43	1168.05	638.95
37	11	52.65	910.65	37	1	908.05	1201.2	36	44	1155.05	637
37	12	55.9	912.6	37	2	896.35	1205.1	36	45	1150.5	636.35
37	13	57.2	914.55	37	3	893.1	1207.7	36	46	1143.35	630.5
37	14	56.55	915.2	37	4	893.1	1212.25	36	47	1132.3	614.25
37	15	56.55	917.8	37	5	895.05	1214.85	37	0	949.65	712.4
37	16	57.85	920.4	37	6	900.9	1231.75	37	1	953.55	711.75
37	17	56.55	921.7	37	7	898.3	1235	37	2	961.35	713.05
37	18	55.9	924.95	37	8	901.55	1236.3	37	3	964.6	714.35
37	19	54.6	927.55	37	9	906.1	1238.25	37	4	963.3	715
37	20	52	932.1	37	10	907.4	1241.5	37	5	958.75	713.05
37	21	49.4	933.4	37	11	909.35	1244.75	37	6	954.85	716.3
37	22	48.75	931.45	37	12	911.95	1247.35	37	7	952.9	711.75
37	23	47.45	931.45	37	13	915.2	1248	37	8	952.25	711.1
37	24	45.5	934.05	37	14	921.7	1246.7	37	9	949.65	709.15
37	25	44.2	935.35	37	15	929.5	1246.7	37	10	947.05	709.8
37	26	39.65	935.35	37	16	938.6	1247.35	37	11	944.45	700.7
37	27	37.7	936.65	37	17	939.9	1248	37	12	939.25	685.75
37	28	35.75	937.95	37	18	940.55	1251.25	37	13	939.25	674.05
37	29	31.85	938.6	37	19	943.15	1257.75	37	14	937.95	666.9
37	30	28.6	937.95	37	20	945.75	1259.7	37	15	935.35	668.85
37	31	24.05	935.35	37	21	950.95	1266.2	37	16	932.1	667.55
37	32	20.8	933.4	37	22	954.2	1274	37	17	935.35	648.05
37	33	16.9	931.45	37	23	953.55	1275.3	37	18	936	637.65
37	34	14.3	928.85	37	24	952.9	1276.6	37	19	936.65	622.7
37	35	0	924.95	37	25	953.55	1273.35	37	20	934.7	614.9
37	36	0	920.4	37	26	952.25	1272.05	37	21	931.45	609.05
37	37	0	917.15	37	27	950.95	1270.1	37	22	928.2	605.8
37	38	10.4	919.75	37	28	949	1270.1	37	23	928.2	603.2
37	39	27.3	912.6	37	29	945.1	1272.05	37	24	927.55	602.55
37	40	28.6	913.25	37	30	940.55	1274.65	37	25	928.85	600.6
37	41	32.5	911.3	37	31	936.65	1272.7	37	26	934.7	603.2
37	42	36.4	908.05	37	32	934.7	1272.05	37	27	937.95	603.85
37	43	37.7	904.8	37	33	935.35	1270.1	37	28	938.6	605.15
37	44	37.05	904.15	37	34	936	1270.1	37	29	939.9	604.5
37	45	37.05	901.55	37	35	933.4	1274	37	30	937.3	601.25
37	46	35.75	901.55	37	36	931.45	1274.65	37	31	934.7	596.7
37	47	36.4	905.45	37	37	928.2	1274.65	37	32	933.4	592.8
38	0	1663.35	950.95	37	38	924.3	1277.25	37	33	934.7	591.5
38	1	1663.35	947.7	37	39	920.4	1274	37	34	936.65	592.8
38	2	1663.35	949.65	37	40	914.55	1272.05	37	35	936.65	593.45
38	3	1663.35	950.95	37	41	911.3	1267.5	37	36	940.55	589.55
38	4	1663.35	954.2	37	42	910	1261	37	37	944.45	582.4
38	5	1663.35	954.2	37	43	906.75	1255.8	37	38	952.9	587.6
38	6	1663.35	956.8	37	44	906.1	1252.55	37	39	962.65	594.1
38	7	1663.35	960.7	37	45	905.45	1250.6	37	40	963.95	601.9
38	8	1663.35	967.2	37	46	902.85	1248	37	41	976.3	605.8
38	9	1663.35	969.8	37	47	899.6	1237.6	37	42	980.85	611
38	10	1663.35	973.7	38	0	709.15	1256.45	37	43	983.45	621.4
38	11	1663.35	976.3	38	1	711.1	1254.5	37	44	989.3	631.15
38	12	1663.35	975	38	2	711.75	1253.2	37	45	991.9	636.35
38	13	1663.35	975.65	38	3	711.1	1249.3	37	46	988	641.55
38	14	1663.35	977.6	38	4	708.5	1246.05	37	47	985.4	644.15
38	15	1663.35	979.55	38	5	709.15	1240.85	38	0	1663.35	714.35
38	16	1663.35	982.15	38	6	708.5	1238.25	38	1	1663.35	717.6
38	17	1663.35	979.55	38	7	707.2	1236.3	38	2	1663.35	716.3
38	18	1663.35	982.8	38	8	707.2	1232.4	38	3	1663.35	712.4
38	19	1663.35	982.8	38	9	707.2	1228.5	38	4	1663.35	711.75
38	20	1663.35	982.8	38	10	707.85	1227.85	38	5	1663.35	715.65
38	21	1663.35	983.45	38	11	712.4	1222.65	38	6	1663.35	714.35
38	22	1663.35	983.45	38	12	715	1218.1	38	7	1663.35	715.65
38	23	1663.35	982.15	38	13	721.5	1218.75	38	8	1663.35	712.4
38	24	1663.35	990.6	38	14	724.1	1220.05	38	9	1663.35	711.1
38	25	1663.35	980.2	38	15	723.45	1217.45	38	10	1663.35	711.75
38	26	1661.4	982.15	38	16	722.8	1218.1	38	11	1663.35	715
38	27	1634.75	986.05	38	17	723.45	1217.45	38	12	1663.35	724.1
38	28	1634.75	989.95	38	18	722.15	1218.75	38	13	1663.35	724.1
38	29	1633.45	988.65	38	19	720.2	1217.45	38	14	1663.35	719.55
38	30	1638	988.65	38	20	713.7	1214.2	38	15	1663.35	724.1
38	31	1634.1	989.3	38	21	712.4	1213.55	38	16	1663.35	724.75
38	32	1636.05	988.65	38	22	711.1	1213.55	38	17	1663.35	721.5
38	33	1634.75	988.65	38	23	711.75	1212.25	38	18	1663.35	716.3
38	34	1645.8	988.65	38	24	709.8	1217.45	38	19	1663.35	707.2
38	35	1663.35	987.35	38	25	707.2	1218.1	38	20	1663.35	702.65
38	36	1663.35	986.05	38	26	707.85	1217.45	38	21	1663.35	702.65
38	37	1663.35	986.05	38	27	703.3	1214.2	38	22	1663.35	705.9
38	38	1663.35	982.15	38	28	700.7	1217.45	38	23	1663.35	710.45
38	39	1663.35	982.8	38	29	702	1220.05	38	24	1663.35	707.85
38	40	1663.35	989.3	38	30	699.4	1223.3	38	25	1663.35	705.25
38	41	1663.35	987.35	38	31	698.1	1227.2	38	26	1652.3	704.6
38	42	1663.35	991.9	38	32	698.1	1230.45	38	27	1633.45	705.25
38	43	1663.35	998.4	38	33	700.7	1233.7	38	28	1627.6	705.25
38	44	1663.35	998.4	38	34	698.75	1237.6	38	29	1627.6	704.6
38	45	1663.35	998.4	38	35	700.7	1243.45	38	30	1631.5	703.3
38	46	1663.35	1000.35	38	36	697.45	1244.1	38	31	1635.4	703.95
38	47	1663.35	1003.6	38	37	694.2	1244.75	38	32	1663.35	709.15
39	0	1423.5	956.15	38	38	689.65	1247.35	38	33	1663.35	712.4
39	1	1424.8	955.5	38	39	684.45	1247.35	38	34	1663.35	712.4
39	2	1424.8	956.8	38	40	675.35	1249.3	38	35	1663.35	711.75
39	3	1426.75	956.15	38	41	672.1	1250.6	38	36	1663.35	709.8
39	4	1428.7	954.85	38	42	668.2	1251.9	38	37	1663.35	709.8
39	5	1428.05	953.55	38	43	666.9	1251.9	38	38	1663.35	703.3
39	6	1430	951.6	38	44	663.65	1255.15	38	39	1663.35	698.1
39	7	1431.95	950.3	38	45	660.4	1257.1	38	40	1663.35	690.3
39	8	1431.3	949.65	38	46	655.85	1259.7	38	41	1663.35	679.9
39	9	1431.3	947.7	38	47	650	1265.55	38	42	1663.35	674.7
39	10	1427.4	945.1	39	0	1484.6	1242.15	38	43	1663.35	676
39	11	1431.95	945.1	39	1	1484.6	1245.4	38	44	1663.35	672.1
39	12	1433.25	943.8	39	2	1485.9	1248.65	38	45	1663.35	666.25
39	13	1439.75	942.5	39	3	1487.2	1249.3	38	46	1663.35	661.7
39	14	1443	941.2	39	4	1487.85	1249.95	38	47	1663.35	651.95
39	15	1445.6	940.55	39	5	1487.2	1248.65	39	0	711.1	721.5
39	16	1450.8	941.2	39	6	1487.2	1249.3	39	1	709.8	723.45
39	17	1456	941.85	39	7	1489.15	1251.25	39	2	709.8	722.15
39	18	1459.25	943.15	39	8	1489.8	1252.55	39	3	711.1	713.7
39	19	1459.25	945.75	39	9	1495	1251.25	39	4	713.05	713.7
39	20	1459.9	947.05	39	10	1496.3	1250.6	39	5	720.2	715
39	21	1461.2	947.7	39	11	1500.85	1249.95	39	6	729.95	716.95
39	22	1458.6	949.65	39	12	1500.2	1249.95	39	7	744.25	713.7
39	23	1459.25	951.6	39	14	1496.95	1251.25	39	8	756.6	703.3
39	24	1457.95	951.6	39	15	1489.15	1251.25	39	9	759.2	689.65
39	25	1456	953.55	39	16	1487.2	1251.25	39	10	764.4	682.5
39	26	1455.35	954.85	39	17	1483.95	1250.6	39	11	765.05	678.6
39	27	1456	956.15	39	18	1478.1	1252.55	39	12	763.1	676.65
39	28	1456	956.8	39	20	1465.75	1253.2	39	13	760.5	673.4
39	29	1450.15	957.45	39	21	1459.9	1251.9	39	14	763.75	662.35
39	30	1447.55	958.1	39	22	1456	1253.2	39	15	762.45	658.45
39	31	1449.5	959.4	39	23	1449.5	1253.2	39	16	761.8	659.75
39	32	1446.9	960.05	39	24	1439.1	1253.2	39	17	762.45	658.45
39	33	1446.9	962	39	25	1431.95	1251.25	39	18	763.75	656.5
39	34	1441.05	962.65	39	26	1421.55	1253.85	39	19	771.55	654.55
39	35	1439.1	963.3	39	27	1415.7	1257.1	39	20	779.35	644.15
39	36	1435.2	965.25	39	28	1408.55	1253.85	39	21	787.15	634.4
39	37	1432.6	965.25	39	29	1400.1	1249.95	39	22	787.15	633.1
39	38	1428.05	965.9	39	30	1392.95	1249.95	39	23	783.25	631.15
39	39	1426.75	965.9	39	31	1389.7	1248	39	24	780	631.8
39	40	1423.5	965.9	39	32	1387.75	1247.35	39	25	776.1	633.75
39	41	1424.15	966.55	39	33	1386.45	1245.4	39	26	768.3	638.3
39	42	1424.8	965.9	39	34	1383.2	1243.45	39	27	744.9	640.25
39	43	1427.4	965.25	39	35	1381.25	1244.1	39	28	739.7	626.6
39	44	1428.05	964.6	39	36	1376.7	1243.45	39	29	742.3	614.9
39	45	1426.75	964.6	39	37	1373.45	1240.2	39	30	746.2	615.55
39	46	1430	963.3	39	38	1371.5	1239.55	39	31	751.4	618.8
39	47	1431.95	962	39	39	1370.2	1236.95	39	32	757.9	633.1
40	0	352.3	990.6	39	40	1369.55	1235	39	33	757.9	630.5
40	1	352.95	984.75	39	41	1368.25	1233.05	39	34	755.3	634.4
40	2	349.05	982.15	39	42	1368.9	1231.75	39	35	752.05	637
40	3	352.95	982.15	39	43	1369.55	1233.7	39	36	753.35	638.95
40	4	358.15	980.85	39	44	1370.85	1233.7	39	37	765.05	642.85
40	5	361.4	982.15	39	45	1370.2	1235	39	38	774.8	642.2
40	6	360.75	987.35	39	46	1369.55	1233.7	39	39	772.2	650.65
40	7	360.1	991.25	39	47	1371.5	1234.35	39	40	772.2	651.95
40	8	364.65	995.8	40	0	1623.05	1259.7	39	41	768.3	646.1
40	9	365.95	1000.35	40	1	1623.7	1258.4	39	42	765.7	640.25
40	10	367.9	1001	40	2	1623.7	1257.1	39	43	762.45	628.55
40	11	366.6	1004.25	40	3	1623.7	1257.75	39	44	763.75	620.1
40	12	364.65	1006.85	40	4	1624.35	1258.4	39	45	772.2	615.55
40	13	362.05	1008.8	40	5	1625	1257.1	39	46	775.45	612.95
40	14	360.1	1010.1	40	6	1624.35	1260.35	39	47	778.7	607.75
40	15	359.45	1008.8	40	7	1624.35	1262.3	40	0	148.2	726.05
40	16	359.45	1010.75	40	8	1623.05	1264.9	40	1	152.1	727.35
40	17	358.8	1012.7	40	9	1621.75	1266.85	40	2	152.75	730.6
40	18	359.45	1010.1	40	10	1619.8	1268.15	40	3	154.7	731.9
40	19	355.55	1006.85	40	11	1619.15	1265.55	40	4	158.6	732.55
40	20	353.6	999.05	40	12	1619.15	1264.25	40	5	161.85	735.15
40	21	354.9	993.2	40	13	1619.15	1263.6	40	6	165.1	739.7
40	22	357.5	990.6	40	14	1619.15	1263.6	40	7	169.65	742.95
40	23	364	983.45	40	15	1619.15	1264.9	40	8	169.65	745.55
40	24	371.15	976.3	40	16	1621.1	1264.25	40	9	171.6	750.1
40	25	373.1	976.95	40	17	1621.1	1266.2	40	10	168.35	752.7
40	26	371.8	980.2	40	18	1620.45	1266.2	40	11	165.1	752.05
40	27	373.75	982.8	40	19	1622.4	1264.25	40	12	162.5	750.75
40	28	375.7	984.1	40	20	1623.05	1262.3	40	13	159.9	747.5
40	29	372.45	997.75	40	21	1623.7	1260.35	40	14	157.95	746.2
40	30	373.1	1000.35	40	22	1624.35	1258.4	40	15	155.35	740.35
40	31	372.45	995.15	40	23	1624.35	1259.05	40	16	152.75	738.4
40	32	369.2	994.5	40	24	1623.7	1261	40	17	152.75	737.1
40	33	365.95	993.2	40	25	1623.7	1261	40	18	148.85	737.1
40	34	359.45	991.9	40	26	1622.4	1261.65	40	19	148.2	737.75
40	35	359.45	989.3	40	27	1624.35	1261	40	20	148.2	737.75
40	36	358.8	991.9	40	28	1625.65	1259.05	40	21	145.6	732.55
40	37	357.5	997.1	40	29	1628.9	1257.1	40	22	141.05	726.05
40	38	352.95	999.05	40	30	1630.2	1255.8	40	23	137.15	722.8
40	39	349.7	997.75	40	31	1632.8	1252.55	40	24	132.6	723.45
40	40	345.15	999.7	40	32	1634.75	1250.6	40	25	130	722.8
40	41	333.45	1010.75	40	33	1638	1250.6	40	26	126.75	720.85
40	42	328.9	1014.65	40	34	1635.4	1254.5	40	27	124.15	717.6
40	43	321.75	1014.65	40	35	1634.1	1257.1	40	28	118.3	716.3
40	44	312	1014.65	40	36	1634.75	1257.75	40	29	111.15	712.4
40	45	309.4	1013.35	40	37	1639.95	1255.8	40	30	105.95	711.1
40	46	307.45	1012.05	40	38	1639.3	1256.45	40	31	102.7	711.1
40	47	306.8	1012.05	40	39	1636.7	1256.45	40	32	105.3	713.05
41	0	1203.8	999.7	40	40	1635.4	1259.05	40	33	109.2	715
41	1	1205.75	1001	40	41	1650.35	1252.55	40	34	115.05	716.95
41	2	1205.75	1002.3	40	42	1645.15	1253.2	40	35	119.6	716.3
41	3	1208.35	997.1	40	43	1663.35	1251.9	40	36	121.55	716.3
41	4	1209.65	997.75	40	44	1663.35	1252.55	40	37	122.2	715.65
41	5	1210.3	998.4	40	45	1663.35	1250.6	40	38	120.25	716.95
41	6	1210.3	1004.9	40	46	1663.35	1248	40	39	120.25	715.65
41	7	1201.85	1013.35	40	47	1663.35	1246.05	40	40	122.2	717.6
41	8	1195.35	1016.6	41	0	802.75	1240.2	40	41	124.15	720.2
41	9	1196.65	1019.2	41	1	800.15	1239.55	40	42	99.45	720.85
41	10	1190.8	1029.6	41	2	795.6	1244.75	40	43	113.1	718.9
41	11	1185.6	1031.55	41	3	785.2	1251.25	40	44	119.6	716.3
41	12	1177.15	1030.9	41	4	778.7	1255.8	40	45	123.5	711.1
41	13	1181.05	1031.55	41	5	774.8	1258.4	40	46	129.35	697.45
41	14	1184.95	1029.6	41	6	772.85	1261	40	47	129.35	688.35
41	15	1183.65	1025.7	41	7	771.55	1263.6	41	0	1179.75	728
41	16	1181.7	1020.5	41	8	770.9	1268.15	41	1	1178.45	729.95
41	17	1177.8	1023.1	41	9	767.65	1270.75	41	2	1175.2	732.55
41	18	1173.9	1021.8	41	10	768.3	1266.85	41	3	1169.35	732.55
41	19	1165.45	1020.5	41	11	770.9	1259.7	41	4	1166.75	732.55
41	20	1160.25	1019.85	41	12	775.45	1254.5	41	5	1166.1	735.8
41	21	1155.05	1021.15	41	13	772.85	1253.85	41	6	1165.45	737.75
41	22	1147.9	1021.15	41	14	768.95	1253.85	41	7	1168.7	742.3
41	23	1142.7	1023.75	41	15	767.65	1253.2	41	8	1168.05	744.9
41	24	1144	1026.35	41	16	766.35	1248.65	41	9	1166.75	746.85
41	25	1150.5	1027.65	41	17	766.35	1244.75	41	10	1167.4	749.45
41	26	1152.45	1025.05	41	18	768.95	1244.1	41	11	1168.05	752.05
41	27	1147.9	1021.8	41	19	771.55	1243.45	41	12	1168.05	754.65
41	28	1146.6	1021.15	41	20	771.55	1244.75	41	13	1166.75	756.6
41	29	1144.65	1020.5	41	21	771.55	1249.3	41	14	1166.1	763.75
41	30	1142.05	1015.95	41	22	772.85	1249.3	41	15	1164.15	773.5
41	31	1140.1	1014.65	41	23	772.2	1250.6	41	16	1164.15	778.7
41	32	1142.05	1014.65	41	24	771.55	1257.1	41	17	1162.85	783.9
41	33	1142.7	1009.45	41	25	773.5	1257.75	41	18	1164.15	780
41	34	1142.7	1002.3	41	26	774.8	1259.05	41	19	1163.5	781.3
41	35	1144.65	998.4	41	27	776.75	1260.35	41	20	1161.55	783.25
41	36	1145.95	994.5	41	28	777.4	1261.65	41	21	1159.6	783.9
41	37	1145.3	993.2	41	29	778.7	1261.65	41	22	1159.6	787.15
41	38	1142.7	990.6	41	30	780.65	1261.65	41	23	1158.3	794.95
[truncated: 2,170 more rows]
