# Supplementary material for: Coalescent RNA-localizing and transcriptional activities of SAM68 modulate adhesion and subendothelial basement membrane assembly
Source: eLife journal article supplement (doi:10.7554/elife.85165), 2023-07-26
Supplement: fig7-data2 [file Figure 7 source data 2.xlsx]

## Sheet: speed extraction summary
Mean speed is infered from dividing the total distance closed by the number of frame (to be corrected by time intervals)
Distance closed is selected between frame 5 and when cells have reached 90% gap closure
Average speed for each condition
Exp. ID (biological replicate)	mean CTRL	mean siSAM68-1	mean siSAM68-2	correction by time interval	mean CTRL	mean siSAM68-1	mean siSAM68-2
HU73	4.95022	6.4091	no si(2) in exp	divided by 10 min frame	0.495022	0.64091	no si(2) in exp
HU85	4.94646	8.9853	7.3055		0.494646	0.89853	0.73055
HU75	4.51648	6.88931	6.7027		0.451648	0.688931	0.67027
HU81	7.91028	10.1853	no si(2) in exp		0.791028	1.01853	no si(2) in exp
HU87	5.06329	6.04358	7.26331		0.506329	0.604358	0.726331
HU7	12.1417	14.2596	13.5855	divided by 20 min frame	0.607085	0.712978	0.679275
HU8	13.5541	17.4654	15.736		0.677707	0.873272	0.786799
HU9 (0.5%)	20.5498	24.8145	27.6951	divided by 30 min frame	0.684992	0.82715	0.92317
HU9 (20%)	26.8468	32.0623	31.5309		0.894893	1.06874	1.05103
RAW data
HU73
CTRL1	Area µm²	area fraction (%)	withd µm	SD	% closure		CTRL2	Area µm²	area fraction (%)	withd µm	SD	% closure		CTRL3	Area µm²	area fraction (%)	withd µm	SD			siSAM2-1	Area µm²	area fraction (%)	withd µm	SD	% closure		siSAM2-2	Area µm²	area fraction (%)	withd µm	SD	% closure		siSAM2-3	Area µm²	area fraction (%)	withd µm	SD	% closure
1	937975	40.149	681.918	43.396	243.948		1	975578	41.758	720.798	52.257	262.183		1	1.03443e+06	44.277	720.727	33.693			1	1.08984e+06	46.649	748.942	59.3	528.506		1	1.01981e+06	43.652	704.37	29.198	879.392		1	1.03187e+06	44.168	720.484	30.918	291.327
2	952600	40.775	697.036	45.32	247.752		2	991092	42.422	722.1	50.242	266.352		2	782904	33.511	571.919	117.441			2	1.09346e+06	46.804	755.673	59.693	530.264		2	1.01081e+06	43.266	701.663	30.652	871.634		2	1.02139e+06	43.719	712.86	33.73	288.368
3	976904	41.815	705.418	42.156	254.073		3	1.02607e+06	43.92	727.135	49.729	275.753		3	971285	41.574	695.68	36.917			3	1.05859e+06	45.312	744.501	57.067	513.354		3	1.00439e+06	42.991	700.783	31.252	866.095		3	964244	41.273	707.4	42.12	272.235
4	961664	41.163	698.926	43.003	250.109		4	909083	38.912	684.892	55.144	244.313		4	973375	41.664	693.05	35.977			4	1.06467e+06	45.572	740.376	61.435	516.299		4	959118	41.054	680.998	37.579	827.056		4	957971	41.005	701.012	44.017	270.463
5	951457	40.726	695.25	56.249	247.455		5	872539	37.348	677.049	69.968	234.492		5	952763	40.782	689.045	40.35			5	1.04121e+06	44.567	717.528	48.859	504.922		5	960037	41.093	677.132	35.766	827.848		5	977850	41.855	688.845	52.056	276.076
6	935932	40.061	682.939	48.175	243.417		6	847693	36.284	660.152	68.391	227.814		6	926187	39.644	682.438	42.843			6	1.00717e+06	43.111	701.605	45.797	488.418		6	990659	42.404	710.849	69.883	854.253		6	962502	41.198	683.648	62.064	271.743
7	926918	39.675	676.805	44.548	241.073		7	830379	35.543	645.385	69.109	223.161		7	903395	38.669	671.807	46.541			7	996132	42.638	696.589	56.204	483.064		7	964643	41.29	688.598	64.15	831.819		7	946225	40.502	669.42	56.499	267.147
8	921409	39.44	678.705	67.504	239.64		8	820447	35.118	625.859	86.925	220.492		8	880290	37.68	651.828	54.9			8	973209	41.657	692.752	70.149	471.948		8	897281	38.407	638.116	39.276	773.733		8	930527	39.83	663.304	58.467	262.715
9	909193	38.917	670.597	71.078	236.463		9	788962	33.77	616.156	86.918	212.031		9	875637	37.48	648.096	51.474			9	984690	42.148	694.417	72.852	477.515		9	908204	38.874	637.031	37.244	783.152		9	912660	39.065	650.419	62.006	257.671
10	899363	38.496	658.854	69.066	233.906		10	768209	32.882	609.152	89.559	206.453		10	862741	36.928	641.011	52.754			10	968736	41.465	681.581	73.345	469.778		10	887048	37.969	623.996	39.465	764.909		10	925084	39.597	652.489	73.584	261.179
11	891600	38.164	661.783	73.921	231.887		11	799606	34.226	615.773	75.647	214.891		11	867415	37.128	643.542	52.758			11	944282	40.419	668	70.708	457.92		11	859383	36.785	608.497	44.426	741.053		11	920934	39.419	659.102	90.984	260.007
12	882607	37.779	660.926	83.923	229.548		12	776337	33.23	594.029	76.426	208.638		12	846110	36.217	624.73	51.516			12	932327	39.907	659.326	72.758	452.122		12	845166	36.176	598.701	42.826	728.793		12	914709	39.153	650.49	80.621	258.249
13	879396	37.641	659.153	97.208	228.713		13	773225	33.097	587.387	74.468	207.801		13	849304	36.353	625.174	55.399			13	906729	38.811	642.887	69.187	439.709		13	806177	34.507	579.948	47.387	695.173		13	842522	36.063	622.883	59.909	237.869
14	875840	37.489	659.462	99.062	227.788		14	772145	33.051	582.944	75.668	207.511		14	832957	35.653	617.097	56.295			14	895923	38.349	633.122	60.939	434.469		14	812077	34.76	579.713	46.721	700.261		14	864798	37.016	617.235	59.179	244.158
15	887714	37.997	664.01	97.353	230.876		15	768869	32.91	587.834	77.964	206.631		15	835946	35.781	614.611	49.357			15	904058	38.697	639.934	67.153	438.413		15	802786	34.362	570.809	52.758	692.249		15	823414	35.245	597.441	59.781	232.474
16	855691	36.627	635.596	89.14	222.548		16	735857	31.497	577.465	85.115	197.759		16	804679	34.443	595.226	74.213			16	887861	38.004	626.915	67.209	430.559		16	806748	34.532	567.225	49.856	695.666		16	813462	34.819	584.572	42.025	229.664
17	853636	36.539	640.45	89.293	222.013		17	732701	31.362	571.299	80.541	196.911		17	810140	34.677	593.856	48.625			17	879367	37.64	615.478	59.081	426.44		17	719347	30.791	546.992	54.553	620.299		17	812318	34.77	582.471	41.306	229.341
18	750943	32.143	551.956	57.58	195.305		18	717321	30.704	554.73	91.681	192.777		18	789636	33.799	567.219	54.379			18	837598	35.852	604.292	59.709	406.184		18	708448	30.324	537.952	53.574	610.9		18	809847	34.664	581.796	36.939	228.644
19	828757	35.474	617.44	83.378	215.543		19	693360	29.678	544.296	79.839	186.338		19	778103	33.306	561.482	53.749			19	842606	36.066	604.517	60.213	408.613		19	701972	30.047	532.996	52.318	605.317		19	799940	34.24	571.946	36.887	225.847
20	827330	35.413	604.395	76.193	215.172		20	715564	30.629	559.986	84.027	192.305		20	778799	33.335	558.982	53.367			20	824717	35.301	590.866	60.813	399.938		20	680011	29.107	517.724	56.171	586.379		20	787457	33.706	562.317	44.93	222.322
21	729514	31.226	544.188	53.88	189.732		21	702230	30.058	559.547	86.507	188.722		21	787651	33.714	565.097	50.352			21	817434	34.989	586.708	60.138	396.406		21	654804	28.028	501.447	61.574	564.643		21	764288	32.714	544.455	45.831	215.781
22	821446	35.161	605.068	81.291	213.641		22	642732	27.511	515.859	106.391	172.732		22	769850	32.952	551.98	50.179			22	765583	32.77	566.342	70.741	371.261		22	662416	28.354	499.567	60.463	571.207		22	798183	34.165	564.999	64.706	225.351
23	817056	34.973	599.42	75.205	212.5		23	666038	28.509	540.209	67.583	178.995		23	770019	32.96	554.944	49.773			23	748570	32.041	547.752	55.416	363.011		23	640521	27.417	488.6	61.929	552.326		23	747201	31.983	540.037	60.818	210.957
24	713056	30.521	548.997	73.99	185.451		24	673756	28.839	528.93	72.7	181.069		24	773799	33.121	556.542	49.067			24	736391	31.52	545.435	49.667	357.105		24	637857	27.303	483.506	60.943	550.03		24	725160	31.039	533.722	62.263	204.734
25	808383	34.602	591.741	74.14	210.244		25	636344	27.238	526.248	71.446	171.015		25	769982	32.958	552.437	47.798			25	741013	31.718	549.087	69.098	359.347		25	619614	26.522	472.81	70.633	534.298		25	720970	30.86	529.28	65.019	203.551
26	802138	34.334	587.46	72.003	208.62		26	666515	28.529	523.071	71.992	179.123		26	755242	32.327	541.57	49.959			26	734901	31.456	543.057	59.673	356.382		26	638130	27.314	482.002	60.044	550.265		26	728746	31.193	529.677	68.418	205.746
27	808379	34.601	591.035	72.42	210.243		27	669469	28.656	519.906	84.049	179.917		27	755356	32.332	545.597	56.719			27	730512	31.268	535.792	57.711	354.254		27	650545	27.846	486.789	57.922	560.97		27	712317	30.49	519.93	69.748	201.108
28	790062	33.817	580.616	73.549	205.479		28	640276	27.406	513.112	82.317	172.072		28	751520	32.168	543.845	57.787			28	713320	30.533	527.46	57.179	345.917		28	602965	25.809	458.519	65.485	519.941		28	686066	29.366	494.71	58.264	193.697
29	791396	33.875	576.667	73.336	205.826		29	666041	28.509	505.866	70.773	178.996		29	736196	31.512	537.224	59.333			29	724185	30.998	537.52	58.114	351.186		29	598053	25.599	453.868	69.275	515.706		29	695232	29.758	505.658	69.2	196.284
30	789512	33.794	574.174	71.906	205.336		30	667334	28.564	499.95	67.84	179.344		30	735458	31.48	525.911	56.775			30	706283	30.231	529.717	57.08	342.504		30	596441	25.53	456.694	67.485	514.316		30	687117	29.411	492.466	58.566	193.993
31	785130	33.606	572.976	80.382	204.196		31	621328	26.595	494.312	74.103	166.98		31	724643	31.017	525.267	56.116			31	696392	29.808	521.464	55.651	337.708		31	604306	25.866	456.344	68.518	521.098		31	694909	29.745	508.448	70.266	196.193
32	759674	32.517	557.993	68.464	197.576		32	587566	25.15	463.173	95.202	157.906		32	721696	30.891	518.243	48.985			32	689843	29.528	517.185	55.118	334.532		32	580326	24.84	442.079	66.466	500.42		32	688628	29.476	504.7	70.829	194.42
33	754291	32.286	553.615	66.982	196.175		33	622333	26.638	487.435	73.671	167.25		33	726297	31.088	521.077	49.678			33	675872	28.93	510.058	56.661	327.757		33	574473	24.589	435.956	63.404	495.373		33	695013	29.749	510.484	76.448	196.223
34	755636	32.344	552.872	68.792	196.525		34	633587	27.12	488.152	73.855	170.274		34	731430	31.308	535.032	58.654			34	676812	28.97	505.27	57.884	328.213		34	583952	24.995	439.621	61.6	503.547		34	686407	29.381	497.538	69.276	193.793
35	736171	31.511	544.606	71.198	191.463		35	552532	23.65	425.009	121.644	148.491		35	712509	30.498	515.891	57.587			35	681332	29.163	521.715	85.511	330.405		35	605849	25.932	455.431	105.236	522.429		35	671029	28.722	492.184	62.538	189.451
36	743519	31.825	560.156	76.501	193.374		36	599623	25.666	477.033	70.298	161.146		36	716270	30.659	515.012	57.841			36	665511	28.486	503.314	78.978	322.733		36	601859	25.762	450.3	101.364	518.988		36	664789	28.455	496.413	72.161	187.69
37	736144	31.51	560.389	81.263	191.456		37	620665	26.567	472.902	62.995	166.801		37	706942	30.26	502.741	49.241			37	656193	28.087	500.433	84.531	318.214		37	568281	24.324	434.306	98.288	490.033		37	637419	27.284	465.761	62.631	179.962
38	722728	30.935	552.62	82.678	187.967		38	560459	23.99	455.383	67.544	150.621		38	695277	29.76	494.812	44.548			38	635049	27.182	472.939	61.279	307.96		38	555154	23.763	424.805	76.703	478.714		38	638439	27.327	465.86	64.314	180.25
39	703530	30.114	522.227	54.31	182.974		39	707447	30.281	515.087	94.041	190.124		39	780656	33.415	597.39	114.099			39	635098	27.184	480.491	79.873	307.984		39	526765	22.547	402.611	64.179	454.234		39	614939	26.322	446.05	57.855	173.615
40	704403	30.151	521.811	57.826	183.201		40	704201	30.142	513.057	91.357	189.251		40	696679	29.82	493.938	60.377			40	619728	26.527	453.803	73.051	300.531		40	533015	22.815	395.018	65.032	459.623		40	614132	26.287	452.607	84.889	173.388
41	698888	29.915	518.157	58.004	181.766		41	686696	29.393	498.984	84.471	184.547		41	696733	29.823	496.958	61.855			41	621223	26.591	468.549	70.763	301.256		41	522100	22.348	386.027	62.641	450.211		41	597303	25.567	452.477	89.008	168.636
42	687469	29.426	508.722	52.922	178.796		42	692031	29.621	498.71	88.155	185.981		42	751332	32.16	565.498	83.633			42	602537	25.791	436.816	67.307	292.194		42	540798	23.148	396.084	67.288	466.335		42	577694	24.727	436.322	89.209	163.1
43	696345	29.806	529.372	77.999	181.105		43	580981	24.868	443.627	84.257	156.137		43	766151	32.794	586.455	107.177			43	617549	26.433	446.704	73.034	299.474		43	532928	22.811	393.629	72.424	459.549		43	569846	24.391	422.826	70.734	160.884
44	676994	28.978	509.836	79.167	176.072		44	531213	22.738	423.559	101.795	142.761		44	675070	28.895	484.351	63.581			44	607566	26.006	448.104	76.944	294.633		44	537365	23.001	386.114	84.945	463.375		44	563784	24.132	418.085	72.792	159.173
45	662311	28.349	491.122	65.413	172.253		45	509598	21.813	407.791	103.277	136.953		45	719752	30.808	535.274	72.579			45	580495	24.847	426.648	80.27	281.505		45	508053	21.746	365.43	78.53	438.098		45	594524	25.448	446.145	96.069	167.852
46	667734	28.581	497.453	69.222	173.664		46	532268	22.783	427.43	90.925	143.045		46	742576	31.785	564.523	111.65			46	561824	24.048	409.239	69.521	272.451		46	507531	21.724	365.247	79.114	437.648		46	594297	25.438	447.646	99.045	167.788
47	659634	28.235	485.016	53.206	171.557		47	503546	21.554	405.768	81.876	135.326		47	624314	26.723	465.11	49.719			47	555604	23.782	401.809	70.997	269.434		47	518838	22.208	369.585	76.989	447.398		47	575807	24.647	431.917	81.796	162.567
48	635274	27.192	465.605	48.884	165.221		48	479968	20.544	380.309	94.546	128.99		48	572614	24.51	415.764	47.624			48	550926	23.582	404.947	67.583	267.166		48	506785	21.692	359.33	72.013	437.005		48	579046	24.785	432.694	80.096	163.482
49	638700	27.339	470.25	53.95	166.112		49	651024	27.866	505.654	118.086	174.96		49	593436	25.401	444.502	73.146			49	559758	23.96	405.474	65.943	271.449		49	493749	21.134	357.783	71.288	425.764		49	570947	24.439	429.838	79.998	161.195
50	647621	27.72	493.999	82.543	168.433		50	648555	27.76	516.645	126.159	174.297		50	745452	31.908	590.382	120.723			50	545966	23.369	398.682	80.575	264.76		50	470634	20.145	340.455	65.138	405.832		50	573948	24.567	427.535	83.253	162.042
51	639976	27.393	487.829	79.406	166.444		51	611052	26.155	478.847	104.501	164.218		51	569334	24.37	431.714	63.11			51	567609	24.296	441.222	116.912	275.256		51	508157	21.751	359.188	68.925	438.188		51	544816	23.32	403.398	87.939	153.818
52	630491	26.987	479.548	79.398	163.978		52	609929	26.107	471.691	100.18	163.916		52	681318	29.163	518.503	95.378			52	558949	23.925	432.337	105.72	271.056		52	502838	21.523	358.947	69	433.601		52	513099	21.962	385.405	82.331	144.863
53	633662	27.123	482.549	78.919	164.802		53	656972	28.121	502.488	119.777	176.559		53	560532	23.993	421.357	67.743			53	554372	23.729	422.335	113.922	268.837		53	496401	21.248	349.338	60.791	428.051		53	501968	21.486	375.186	89.154	141.72
54	631384	27.025	474.317	79.122	164.21		54	614815	26.316	474.316	97.955	165.229		54	709389	30.364	620.961	170.049			54	521246	22.311	385.565	84.031	252.773		54	476111	20.379	330.361	56.842	410.555		54	485277	20.772	361.136	87.276	137.008
55	621644	26.609	468.79	76.426	161.677		55	614074	26.285	469.881	99.279	165.03		55	660691	28.28	508.293	110.621			55	497190	21.282	368.366	71.148	241.107		55	445676	19.076	331.915	62.173	384.31		55	490993	21.016	367.501	87.553	138.622
56	633353	27.11	468.336	78.099	164.722		56	604475	25.874	455.476	92.448	162.45		56	546982	23.413	397.261	58.554			56	499937	21.399	370.813	68.993	242.439		56	402798	17.241	296.37	86.144	347.336		56	465085	19.907	347.682	80.72	131.307
57	615223	26.334	459.984	83.693	160.007		57	590995	25.297	433.41	84.448	158.828		57	627872	26.875	512.31	111.761			57	487181	20.853	373.583	68.83	236.253		57	449943	19.259	346.338	92.895	387.99		57	467082	19.993	351.842	85.534	131.871
58	590540	25.277	451.189	82.665	153.587		58	565621	24.211	443.469	94.447	152.008		58	605839	25.932	468.262	118.395			58	500145	21.408	380.649	72.54	242.54		58	432943	18.532	344.495	95.556	373.331		58	467626	20.016	353.197	88.493	132.025
59	594198	25.434	447.33	80.498	154.538		59	580547	24.849	429.1	86.399	156.02		59	615352	26.339	475.973	104.841			59	475894	20.37	375.374	65.105	230.78		59	388513	16.63	306.246	82.456	335.018		59	467698	20.019	346.164	89.51	132.045
60	596517	25.533	450.582	81.145	155.141		60	562554	24.079	414.043	83.752	151.184		60	617117	26.415	483.307	73.523			60	474206	20.298	363.505	73.646	229.961		60	383562	16.418	303.254	84.657	330.748		60	457560	19.585	338.603	87.428	129.183
61	583883	24.992	444.984	77.201	151.856		61	516952	22.127	424.249	104.228	138.929		61	616404	26.384	471.088	92.209			61	454911	19.472	355.396	66.422	220.604		61	390875	16.731	300.797	101.242	337.054		61	454212	19.442	333.213	79.043	128.238
62	581028	24.87	442.067	76.881	151.113		62	550288	23.554	428.932	103.812	147.888		62	617387	26.426	474.951	102.627			62	458972	19.646	362.048	68.679	222.574		62	381551	16.332	286.975	87.387	329.015		62	440861	18.87	321.061	59.364	124.468
63	567619	24.296	434.93	81.083	147.626		63	409961	17.548	345.039	94.925	110.175		63	517990	22.172	397.555	83.897			63	444265	19.016	339.749	60.4	215.442		63	373433	15.984	291.455	93.084	322.015		63	436756	18.695	321.94	73.245	123.309
64	556959	23.84	428.585	76.13	144.853		64	393763	16.854	322	106.353	105.822		64	475701	20.362	350.693	67.012			64	434672	18.606	334.607	68.575	210.79		64	201865	8.641	277.809	122.211	174.07		64	440293	18.846	329.51	96.638	124.308
65	549621	23.526	415.737	68.408	142.945		65	455864	19.513	372.814	91.789	122.512		65	511165	21.88	398.906	78.683			65	396133	16.956	320.607	70.152	192.1		65	210165	8.996	283.375	121.213	181.227		65	431726	18.479	322.235	91.962	121.889
66	548266	23.468	414.576	66.991	142.592		66	531020	22.73	428.872	117.464	142.709		66	508140	21.75	400.362	87.696			66	395406	16.925	325.615	104.119	191.748		66	222310	9.516	293.055	114.22	191.7		66	442052	18.921	329.961	95.941	124.804
67	530728	22.717	387.803	58.03	138.031		67	383039	16.395	331.904	94.742	102.94		67	624223	26.719	484.672	85.366			67	406123	17.384	311.391	80.677	196.945		67	201854	8.64	275.794	107.119	174.06		67	418424	17.91	322.559	89.515	118.133
68	534781	22.89	399.976	64.099	139.085		68	514891	22.039	421.541	121.521	138.375		68	637005	27.266	512.159	76.002			68	388172	16.615	299.84	80.26	188.24		68	192068	8.221	273.962	106.308	165.622		68	412078	17.638	324.951	92.752	116.342
69	537627	23.012	396.052	71.042	139.825		69	508642	21.772	406.807	129.398	136.696		69	531145	22.735	408.726	74.86			69	357989	15.323	280.83	75.027	173.603		69	170809	7.311	264.558	107.355	147.29		69	354196	15.161	288.853	121.378	100
70	522512	22.365	380.663	66.585	135.894		70	485946	20.8	368.522	105.471	130.596		70	627265	26.849	515.936	117.277			70	442252	18.93	391.034	106.205	214.466		70	186328	7.975	284.227	118.191	160.672		70	344774	14.758	292.807	125.946	97.3398
71	513412	21.976	374.729	62.463	133.527		71	458641	19.631	364.403	115.041	123.258		71	615138	26.33	495.575	93.743			71	370222	15.847	295.361	78.831	179.535		71	160154	6.855	258.536	127.83	138.102		71	338424	14.486	273.018	128.784	95.5471
72	512737	21.947	377.135	61.69	133.352		72	495830	21.223	381.302	127.629	133.252		72	512539	21.938	397.048	79.489			72	288579	12.352	322.247	87.383	139.943		72	170450	7.296	267.964	119.286	146.98		72	320149	13.704	271.292	126.455	90.3875
73	496566	21.255	365.634	56.987	129.146		73	347129	14.858	287.118	110.088	93.2897		73	476528	20.397	367.996	61.263			73	293564	12.566	333.135	81.956	142.361		73	169406	7.251	251.964	116.85	146.081		73	372026	15.924	283.775	101.831	105.034
74	479928	20.543	355.344	52.907	124.819		74	333141	14.26	277.153	109.598	89.5304		74	571765	24.474	426.278	81.281			74	272665	11.671	287.634	96.905	132.226		74	145723	6.237	229.25	114.339	125.658		74	359848	15.403	303.237	118.231	101.596
75	484084	20.721	358.841	57.708	125.9		75	349114	14.943	281.933	112.445	93.8231		75	609117	26.072	474.051	86.149			75	352815	15.102	395.747	151.994	171.094		75	141981	6.077	223.323	112.206	122.432		75	335083	14.343	273.228	106.265	94.6037
76	472516	20.225	352.149	53.095	122.891		76	344157	14.731	300.273	119.199	92.4908		76	454852	19.469	353.547	89.21			76	291557	12.48	309.952	103.089	141.387		76	130804	5.599	206.332	110.495	112.794		76	317221	13.578	266.455	114.915	89.5607
77	459575	19.671	337.827	52.183	119.526		77	452525	19.37	362.095	138.346	121.614		77	564319	24.155	470.717	94.683			77	266149	11.392	266.309	96.995	129.066		77	108280	4.635	225.161	65.802	93.3707		77	309455	13.246	275.279	135.478	87.3682
78	462236	19.785	337.29	52.492	120.217		78	344293	14.737	279.232	101.156	92.5275		78	417883	17.887	328.776	91.627			78	299949	12.839	381.82	157.179	145.457		78	132126	5.655	236.16	107.451	113.934		78	301575	12.908	248.442	131.26	85.1434
79	454040	19.435	328.768	52.48	118.086		79	329096	14.086	269.961	101.458	88.4432		79	441032	18.878	342.487	82.897			79	274518	11.75	318.877	162.408	133.125		79	91706.2	3.925	189.951	82.4	79.079		79	289548	12.394	267.743	132.255	81.7478
80	442785	18.953	321.505	55.686	115.159		80	413720	17.709	322.181	121.883	111.186		80	526371	22.531	411.325	71.784			80	276383	11.83	270.763	130.649	134.029		80	96216.3	4.118	210.804	106.685	82.9682		80	306960	13.139	270.053	127.178	86.6638
81	445076	19.051	337.401	52.922	115.755		81	409945	17.547	324.231	126.282	110.171		81	530395	22.703	416.514	92.626			81	259636	11.113	257.727	113.495	125.908		81	92008.2	3.938	207.91	95.584	79.3395		81	168406	7.208	189.639	173.819	47.5458
82	457595	19.587	337.122	57.865	119.01		82	313664	13.426	258.472	106.298	84.296		82	411192	17.6	340.402	72.653			82	224359	9.603	241.492	103.7	108.801		82	115968	4.964	260.672	104.979	100		82	150883	6.458	176.432	158.58	42.5988
83	429712	18.393	325.301	57.875	111.759		83	296960	12.711	244.47	112.307	79.8068		83	388487	16.629	320.375	76.228			83	230563	9.869	240.11	96.586	111.809		83	87284.3	3.736	198.85	93.083	75.266		83	140499	6.014	196.656	159.039	39.667
84	423236	18.116	323.726	60.846	110.074		84	378097	16.184	303.688	119.05	101.612		84	491000	21.017	376.84	63.161			84	230639	9.872	260.412	83.033	111.846		84	82465.7	3.53	183.254	86.897	71.1108		84	141322	6.049	241.884	84.162	39.8994
85	434212	18.586	321.45	65.248	112.929		85	317145	13.575	258.013	105.794	85.2314		85	413953	17.719	319.317	81.587			85	213558	9.141	254.151	75.713	103.563		85	100455	4.3	208.416	79.897	86.6234		85	121731	5.211	232.501	120.946	34.3682
86	429361	18.378	316.586	67.323	111.668		86	372098	15.927	301.394	127.606	100		86	490645	21.001	397.078	89.997			86	232677	9.959	241.273	114.912	112.834		86	94500.2	4.045	189.971	76.16	81.4883		86	133015	5.694	237.24	127.923	37.554
87	401629	17.191	303.395	72.302	104.455		87	374996	16.051	293.532	125.265	100.779		87	507188	21.709	410.108	94.85			87	210083	8.992	203.186	83.087	101.878		87	79570.7	3.406	173.361	80.746	68.6145		87	118401	5.068	207.049	109.79	33.4281
88	304427	13.031	236.163	69.313	79.1744		88	399178	17.086	314.711	134.116	107.278		88	521551	22.324	444.514	93.611			88	186763	7.994	189.591	79.423	90.5688		88	72763.8	3.115	176.782	91.535	62.7448		88	120428	5.155	202.555	95.838	34.0004
89	384500	16.458	285.127	68.496	100		89	378342	16.194	299.443	134.705	101.678		89	366490	15.687	308.963	61.684			89	206211	8.827	192.963	72.604	100		89	89256.1	3.82	118.264	156.349	76.9663		89	118268	5.062	207.002	90.289	33.3905
90	376771	16.127	276.504	64.827	97.9898		90	350543	15.004	274.487	139.558	94.2071		90	473824	20.281	403.839	123.122			90	192552	8.242	195.239	96.142	93.3762		90	89645.6	3.837	128.65	151.009	77.3022		90	106055	4.54	194.192	97.971	29.9424
91	370275	15.849	272.645	65.272	96.3003		91	376776	16.127	301.901	140.79	101.257		91	358566	15.348	287.832	64.627			91	162450	6.953	163.761	79.514	78.7786		91	83333.1	3.567	96.27	160.609	71.8588		91	118425	5.069	197.866	106.71	33.4348
92	355903	15.234	254.845	64.888	92.5625		92	250684	10.73	196.79	100.299	67.3704		92	343874	14.719	278.402	69.144			92	177935	7.616	165.185	75.732	86.2877		92	95842.9	4.102	112.357	169.917	82.6461		92	122603	5.248	190.872	133.555	34.6144
93	353273	15.121	262.735	62.237	91.8782		93	335070	14.342	261.005	140.315	90.0488		93	329736	14.114	282.603	72.654			93	135391	5.795	179.831	91.542	65.6566		93	79319.7	3.395	131.995	134.037	68.3981		93	124435	5.326	190.275	141.052	35.1316
94	352585	15.092	265.402	67.217	91.6993		94	242628	10.385	186.444	90.031	65.2054		94	332737	14.242	293.367	82.76			94	111829	4.787	161.555	74.791	54.2301		94	53768.2	2.301	65.294	149.152	46.3648		94	131639	5.635	180.374	151.282	37.1656
95	344427	14.743	256.162	56.239	89.5778		95	145641	6.234	240.98	71.873	39.1405		95	229953	9.843	279.29	80.269			95	159903	6.844	176.066	84.129	77.5434		95	65572.8	2.807	97.419	146.784	56.544		95	119475	5.114	169.351	154.331	33.7313
96	337004	14.425	250.209	56.495	87.6471		96	144101	6.168	236.605	72.475	38.7265		96	415494	17.785	372.925	98.015			96	154100	6.596	157.71	74.16	74.729		96	68027.1	2.912	118.314	136.411	58.6604		96	105845	4.531	184.382	137.644	29.8831
97	332813	14.246	246.288	53.832	86.5571		97	341124	14.601	280.373	131.632	91.6759		97	478015	20.461	400.803	133.578			97	142624	6.105	141.177	78.596	69.1641		97	73984	3.167	118.531	144.157	63.797		97	111619	4.778	184.076	116.11	31.5135
98	327334	14.011	238.483	55.628	85.1321		98	144183	6.172	216.328	89.617	38.7486		98	303844	13.006	263.558	85.764			98	147532	6.315	159.016	99.701	71.5439		98	32043.2	1.372	27.754	139.692	27.6312		98	112143	4.8	207.002	131.153	31.6614
99	320489	13.718	233.119	56.85	83.3518		99	147910	6.331	241.315	107.292	39.7503		99	452807	19.382	387.614	117.973			99	163178	6.985	195.365	102.644	79.1312		99	28302	1.211	28.146	138.793	24.4051		99	105029	4.496	183.12	125.444	29.6529
100	315124	13.488	232.861	53.882	81.9566		100	150126	6.426	236.565	101.806	40.3457		100	455952	19.516	388.232	113.874			100	156870	6.715	181.406	103.387	76.0727		100	43986.1	1.883	70.64	156.213	37.9295		100	101844	4.359	208.249	130.625	28.7535
101	237333	10.159	179.979	77.303	61.7244		101	147281	6.304	229.393	99.258	39.5813		101	427609	18.303	368.336	117.741			101	153420	6.567	173.821	101.326	74.3996		101	44969.2	1.925	77.244	142.658	38.7773		101	85427.4	3.657	201.116	98.836	24.1187
102	282038	12.072	221.107	82.39	73.3514		102	134828	5.771	210.116	87.339	36.2346		102	391087	16.74	317.747	92.535			102	95866.9	4.103	150.547	101.429	46.4897		102	41263.9	1.766	86.979	117.655	35.5822		102	80435.1	3.443	195.43	90.106	22.7092
103	275927	11.811	234.593	71.838	71.762		103	281660	12.056	226.043	105.243	75.695		103	203544	8.712	261.78	89.184			103	111832	4.787	187.458	135.433	54.2317		103	34253.8	1.466	26.957	95.743	29.5373		103	72238.2	3.092	178.012	92.408	20.395
104	274029	11.729	236.995	72.464	71.2684		104	143714	6.151	213.214	88.017	38.6225		104	245164	10.494	236.624	88.773			104	92868	3.975	158.443	95.497	45.0354		104	39821.9	1.705	81.803	109.055	34.3388		104	72779.4	3.115	184.065	96.803	20.5478
105	258627	11.07	225.498	74.877	67.2627		105	139499	5.971	213.376	89.571	37.4898		105	389568	16.675	352.208	118.53			105	87160.1	3.731	152.628	96.717	42.2674		105	36140.2	1.547	18.44	95.831	31.164		105	88645.1	3.794	160.968	120.227	25.0271
106	252039	10.788	213.647	77.942	65.5494		106	140169	6	206.922	80.14	37.67		106	401972	17.206	397.971	108.141			106	102963	4.407	177.354	106.598	49.931		106	35762.9	1.531	19.755	91.332	30.8387		106	80316.4	3.438	166.696	109.626	22.6757
107	254994	10.915	226.476	72.331	66.3177		107	137798	5.898	219.088	91.78	37.0326		107	420804	18.012	395.969	104.637			107	78415.2	3.356	139.802	95.58	38.0266		107	40645.8	1.74	21.474	128.578	35.0492		107	60081.6	2.572	145.431	112.338	16.9628
108	239982	10.272	193.735	90.938	62.4134		108	136191	5.829	219.971	91.196	36.6009		108	155247	6.645	276.746	54.997			108	107964	4.621	158.338	93.891	52.356		108	34484	1.476	19.993	126.533	29.7359		108	67038.5	2.869	156.241	115.145	18.9269
109	225714	9.661	201.638	74.483	58.7026		109	136250	5.832	214.759	82.845	36.6168		109	161886	6.929	283.007	49.831			109	81650.7	3.495	147.94	90.177	39.5956		109	31207.5	1.336	18.928	118.289	26.9105		109	62686.7	2.683	163.29	102.676	17.6983
110	245669	10.515	198.249	64.378	63.8925		110	289998	12.413	252.385	171.511	77.9359		110	165146	7.069	289.976	42.136			110	66783.3	2.859	170.179	74.885	32.3859		110	28869.8	1.236	30.384	111.142	24.8947		110	79638.7	3.409	197.612	71.882	22.4844
111	216021	9.246	189.927	75.033	56.1817		111	128622	5.505	202.633	87.605	34.5667		111	183105	7.838	251.807	73.4			111	84287.9	3.608	147.985	95.555	40.8745		111	27620.9	1.182	18.9	104.763	23.8178		111	86825	3.716	194.361	48.792	24.5133
112	201655	8.632	185.988	65.273	52.4454		112	170050	7.279	275.596	127.985	45.7003		112	304110	13.017	303.027	115.919			112	71647.1	3.067	141.853	88.151	34.7445		112	28102.2	1.203	23.392	87.905	24.2327		112	73956.9	3.166	167.648	84.683	20.8802
113	200033	8.562	188.601	65.93	52.0236		113	202205	8.655	354.101	172.092	54.3417		113	373228	15.975	351.715	104.355			113	90448.4	3.872	197.831	95.565	43.862		113	32977.8	1.412	6.025	88.032	28.437		113	55790.7	2.388	145.207	86.032	15.7514
114	192182	8.226	177.964	69.873	49.9816		114	196578	8.414	385.26	219.487	52.8297		114	344040	14.726	304.249	91.153			114	101979	4.365	194.646	81.386	49.4538		114	26720.6	1.144	0.539	75.967	23.0414		114	72718.6	3.113	154.853	92.28	20.5306
115	184616	7.902	170.64	70.87	48.0139		115	164852	7.056	273.304	125.977	44.3034		115	230011	9.845	291.263	91.109			115	65055.3	2.785	179.437	69.041	31.5479		115	29492.6	1.262	42.953	62.708	25.4317		115	59661.6	2.554	137.298	92.293	16.8442
116	188350	8.062	174.383	63.062	48.9849		116	179631	7.689	277.171	125.481	48.2751		116	301524	12.906	281.539	105.319			116	67270.9	2.879	168.465	81.232	32.6223		116	22919.4	0.981	28.544	88.784	19.7636		116	49118.2	2.102	160.443	74.592	13.8675
117	180800	7.739	169.028	59.538	47.0215		117	159926	6.845	286.722	142.27	42.9794		117	220066	9.42	296.828	100.183			117	72302	3.095	134.514	79.315	35.0621		117	32155.6	1.376	85.547	79.69	27.7281		117	45890.7	1.964	123.347	53.705	12.9563
118	155341	6.649	152.001	67.689	40.4001		118	137670	5.893	266.73	110.486	36.9983		118	189348	8.105	251.579	99.905			118	74841.6	3.203	154.7	64.889	36.2937		118	12522.9	0.536	28.034	73.554	10.7986		118	44792.2	1.917	123.567	86.972	12.6462
119	156907	6.716	145.407	71.654	40.8072		119	142778	6.111	265.164	118.112	38.3711		119	188108	8.052	294.786	109.166			119	66309.3	2.838	124.849	84.685	32.156		119	21359.5	0.914	85.61	62.177	18.4185		119	41665.7	1.783	122.708	91.048	11.7635
120	143363	6.136	151.028	60.42	37.2848		120	130011	5.565	263.275	114.385	34.9399		120	194494	8.325	249.185	120.87			120	48450.2	2.074	150.038	64.207	23.4954		120	21673.4	0.928	83.609	59.631	18.6892		120	38837.5	1.662	121.348	61.51	10.965
121	144541	6.187	135.286	71.022	37.5912		121	144989	6.206	266.253	140.196	38.9652		121	171307	7.333	252.099	99.064			121	52095.1	2.23	144.64	59.683	25.263		121	37555.6	1.608	103.426	75.025	32.3845		121	41344.6	1.77	103.298	97.751	11.6728
122	135581	5.803	136.723	69.49	35.2607		122	151325	6.477	282.209	131.817	40.6679		122	257504	11.022	261.903	128.708			122	56323.9	2.411	126.723	63.838	27.3137		122	29737.7	1.273	85.619	51.812	25.643		122	44714.4	1.914	105.83	93.629	12.6242
123	123457	5.284	138.456	63.53	32.1074		123	125992	5.393	283.149	134.004	33.8599		123	190170	8.14	257.696	116.141			123	64214.5	2.749	137.494	74.99	31.1402		123	30641.8	1.312	97.129	47.58	26.4227		123	37995	1.626	98.835	99.065	10.7271
124	132060	5.653	130.323	63.768	34.3451		124	102872	4.403	221.445	126.59	27.6466		124	174116	7.453	281.081	84.991			124	58544.1	2.506	126.4	55.381	28.3904		124	15000.9	0.642	75.224	38.677	12.9354		124	33759	1.445	122.826	73.115	9.53117
125	131872	5.645	130.421	64.572	34.296		125	137315	5.878	256.687	145.542	36.903		125	167141	7.154	256.973	79.546			125	54141.7	2.317	158.512	66.62	26.2554		125	15612.2	0.668	65.395	41.81	13.4625		125	23677.3	1.013	119.143	65.023	6.68481
126	124290	5.32	121.571	60.781	32.3241		126	109647	4.693	229.42	121.283	29.4672		126	100565	4.305	159.92	74.223			126	75589.1	3.235	147.284	72.165	36.6561		126	12530.5	0.536	56.898	24.837	10.8052		126	24853.6	1.064	114.664	65.886	7.01689
127	77097	3.3	119.689	44.292	20.0502		127	106859	4.574	224.27	116.169	28.718		127	169643	7.261	285.404	85.77			127	48895.5	2.093	131.324	69.571	23.7114		127	10634.3	0.455	49.837	26.406	9.17007		127	23687.9	1.014	115.133	63.568	6.68779
128	66882.2	2.863	119.988	45.542	17.3935		128	115441	4.941	247.4	108.39	31.0242		128	121601	5.205	191.027	84.125			128	34464.2	1.475	102.455	35.904	16.713		128	5681.36	0.243	36.23	19.143	4.89908		128	16942.7	0.725	102.179	49.576	4.78342
129	63908.2	2.735	108.058	47.188	16.62		129	102118	4.371	220.999	107.215	27.4438		129	175447	7.51	262.233	81.397			129	34380.5	1.472	128.329	50.282	16.6725		129	15911.8	0.681	49.752	42.983	13.7209		129	17012.8	0.728	94.881	58.153	4.80322
130	55436.2	2.373	99.24	44.626	14.4166		130	98112.9	4.2	221.778	116.525	26.3675		130	163706	7.007	250.645	104.432			130	23789.7	1.018	90.519	63.141	11.5366		130	7810.76	0.334	34.68	37.464	6.73528		130	16292.9	0.697	74.083	42.751	4.59996
131	58696.7	2.512	106.413	47.499	15.2646		131	109981	4.708	260.711	112.376	29.5571		131	171659	7.348	267.621	119.623			131	17760.2	0.76	71.332	41.084	8.61263		131	9695.11	0.415	40.77	44.503	8.36017		131	14895.2	0.638	61.105	33.277	4.20536
132	30385.8	1.301	120.623	63.769	7.90148		132	98800.8	4.229	228.944	93.329	26.5523		132	164208	7.029	264.231	96.03			132	17067.7	0.731	83.643	40.826	8.27682		132	7618.52	0.326	39.537	34.171	6.56951		132	10304.8	0.441	59.079	35.814	2.90934
133	28730.8	1.23	111.206	58.342	7.47106		133	95260.7	4.077	227.422	96.722	25.6009		133	159401	6.823	277.408	91.944			133	14637.1	0.627	48.717	61.417	7.0981		133	9728.49	0.416	31.521	27.072	8.38895		133	10795.3	0.462	64.437	30.966	3.04783
134	55324.3	2.368	89.501	44.766	14.3875		134	99274	4.249	228.793	92.813	26.6795		134	43681.4	1.87	136.644	95.533			134	9789.33	0.419	53.028	36.301	4.74723		134	12402.1	0.531	51.635	35.84	10.6944		134	5195.48	0.222	25.386	33.83	1.46684
135	54813.5	2.346	84.901	44.147	14.2547		135	81440.7	3.486	202.988	105.61	21.8869		135	104799	4.486	308.174	131.376			135	30168.6	1.291	127.083	65.426	14.63		135	6116.11	0.262	31.198	14.398	5.27397		135	6512.84	0.279	43.661	31.127	1.83877
136	50798.9	2.174	76.153	46.37	13.2105		136	78205.6	3.347	204.492	98.827	21.0175		136	99539.3	4.261	243.734	87.639			136	15844.6	0.678	50.562	41.241	7.68367		136	6842.81	0.293	32.448	17.197	5.90061		136	6458.34	0.276	41.735	21.372	1.82338
137	50584.7	2.165	80.921	51.761	13.1548		137	79622.7	3.408	206.438	95.976	21.3983		137	97932.1	4.192	295.992	124.798			137	19813.1	0.848	4.627	43.886	9.60817		137	7858.08	0.336	35.266	17.522	6.77609		137	4559.62	0.195	31.233	18.749	1.28732
138	43235.7	1.851	77.519	53.612	11.2435		138	79002.9	3.382	205.316	92.45	21.2317		138	93865.6	4.018	277.777	113.32			138	25718.8	1.101	73.732	49.437	12.4721		138	5372.09	0.23	31.959	14.815	4.6324		138	4533.43	0.194	21.491	25.89	1.27992
139	28480.3	1.219	91.691	56.382	7.4059		139	79301.1	3.394	205.97	88.247	21.3119		139	96584.3	4.134	263.135	116.866			139	15000.9	0.642	14.553	45.171	7.27451		139	7030.82	0.301	37.441	29.398	6.06274		139	4981.27	0.213	19.432	25.545	1.40636
140	27598.1	1.181	102.528	64.049	7.17646		140	84080	3.599	203.527	116.993	22.5962		140	93195.9	3.989	257.009	118.333			140	15365.1	0.658	77.27	41.611	7.45112		140	11211	0.48	22.456	74.899	9.66737		140	5169.71	0.221	18.176	26.368	1.45956
141	24056.7	1.03	102.201	57.936	6.25541		141	76132.8	3.259	186.401	95.538	20.4604		141	88756.7	3.799	249.816	116.692			141	15630.4	0.669	85.889	33.609	7.57979		141	10485.2	0.449	30.061	75.043	9.04146		141	3669.84	0.157	33.477	18.083	1.0361
142	23967.2	1.026	94.012	47.589	6.23212		142	70574.4	3.021	174.749	91.566	18.9666		142	99396.1	4.255	206.719	115.179			142	13733.4	0.588	67.876	38.374	6.65985		142	19375.8	0.829	142.281	56.969	16.708		142	4506.39	0.193	12.812	59.199	1.27229
143	25691.8	1.1	93.18	46.849	6.68067		143	92287.5	3.95	215.462	108.048	24.8019		143	95277.1	4.078	195.452	96.131			143	14363.3	0.615	77.758	32.828	6.96534		143	19247.4	0.824	106.126	74.797	16.5972		143	5071.69	0.217	24.147	38.77	1.43189
144	22640.1	0.969	83.774	42.494	5.88697		144	77668.2	3.324	156.145	123.473	20.873		144	55794.1	2.388	141.809	114.273			144	10669.8	0.457	19.312	41.868	5.17422		144	5532.64	0.237	17.696	34.401	4.77084		144	4028.96	0.172	18.797	26.755	1.13749
145	20425.3	0.874	77.508	39.881	5.31096		145	73827.6	3.16	154.225	120.354	19.8409		145	54747.1	2.343	137.4	112.355			145	8456.34	0.362	59.175	23.152	4.10081		145	6374.26	0.273	37.142	33.745	5.49658		145	3875.59	0.166	20.461	25.455	1.09419
HU85
CTRL1	Area µm²	area fraction (%)	withd µm	SD	% closure		CTRL2	Area µm²	area fraction (%)	withd µm	SD	% closure		siSAM2-1	Area µm²	area fraction (%)	withd µm	SD	% closure		siSAM2-2	Area µm²	area fraction (%)	withd µm	SD	% closure		siSAM4-1	Area µm²	area fraction (%)	withd µm	SD	% closure		siSAM4-2	Area µm²	area fraction (%)	withd µm	SD	% closure
1	610258	26.121	433.869	38.373	-274.917		1	597770	25.587	429.771	34.862	247.029		1	528248	22.611	375.432	43.079	-59.8085		1	576722	24.686	408.447	17.57	146.79		1	483481	20.695	459.562	41.119	-756.077		1	802133	34.334	575.519	44.145	403.691
2	626104	26.799	443.39	38.737	-290.859		2	606506	25.961	432.259	30.103	251.786		2	526070	22.518	374.12	40.701	-59.1425		2	598726	25.628	424.004	20.981	289.291		2	613842	26.275	458.962	41.966	-993.318		2	818644	35.041	584.316	50.305	416.694
3	639529	27.374	452.958	35.311	-304.365		3	625140	26.758	444.877	32.437	261.933		3	526040	22.516	374.227	43.398	-59.1332		3	572338	24.498	406.787	20.298	271.894		3	663894	28.417	463.316	42.583	-1084.41		3	818150	35.02	586.663	59.879	416.305
4	637869	27.303	450.467	34.738	-302.695		4	621643	26.609	442.45	33.054	260.029		4	520198	22.266	369.716	44.473	-57.346		4	547945	23.454	389.47	23.865	255.814		4	660382	28.267	458.436	48.124	-1078.01		4	812839	34.792	581.674	61.142	412.123
5	630651	26.994	445.233	33.391	-295.433		5	601853	25.761	428.743	33.774	249.253		5	496320	21.244	356.807	44.26	-50.0415		5	529401	22.66	376.799	24.616	243.588		5	593783	25.416	430.797	51.355	-956.813		5	778556	33.325	555.684	52.61	385.122
6	619726	26.526	436.259	34.072	-284.442		6	596084	25.515	429.366	36.621	246.112		6	486224	20.812	349.52	40.869	-46.9531		6	512488	21.936	365.215	21.708	232.439		6	580334	24.84	416.55	56.236	-932.337		6	789058	33.774	562.32	61.212	393.393
7	604801	25.888	425.831	35.093	-269.426		7	676252	28.946	511.574	104.139	289.764		7	473798	20.28	344.465	59.859	-43.152		7	491678	21.046	350.979	24.34	218.72		7	550290	23.554	399.807	52.183	-877.66		7	777649	33.286	558.22	64.625	384.408
8	591755	25.329	418.323	39.584	-256.301		8	566824	24.262	409.684	38.503	230.179		8	458096	19.608	331.514	56.503	-38.3484		8	463739	19.85	330.689	23.756	200.301		8	520760	22.29	377.729	51.851	-823.919		8	700775	29.996	504.946	48.906	323.866
9	578272	24.752	409.12	43.309	-242.736		9	577484	24.718	417.275	37.542	235.983		9	450339	19.276	325.689	53.899	-35.9756		9	443859	18.999	321.357	26.92	187.195		9	488530	20.911	363.5	55.362	-765.266		9	692284	29.632	498.692	51.271	317.179
10	567530	24.292	399.446	43.098	-231.928		10	545991	23.37	394.298	37.429	218.835		10	446070	19.093	321.031	58.747	-34.6695		10	433914	18.573	312.197	23.955	180.639		10	393398	16.839	344.024	57.325	-592.136		10	677314	28.991	487.816	49.538	305.388
11	556754	23.831	393.831	44.131	-221.087		11	544109	23.29	390.823	36.695	217.81		11	432251	18.502	319.764	69.503	-30.4423		11	412546	17.658	296.566	27.881	166.553		11	456434	19.537	341.357	52.257	-706.854		11	654215	28.003	470.63	58.128	287.197
12	541890	23.195	383.831	46.345	-206.133		12	516036	22.088	371.479	39.56	202.524		12	418305	17.905	300.675	60.723	-26.176		12	390928	16.733	281.485	29.097	152.301		12	439814	18.826	333.434	52.54	-676.607		12	644543	27.589	462.918	59.088	279.58
13	529424	22.661	376.087	47.447	-193.591		13	507432	21.72	364.126	42.189	197.839		13	394607	16.891	286.459	62.438	-18.9266		13	377011	16.137	271.22	27.708	143.127		13	381769	16.341	307.279	54.248	-570.973		13	633778	27.128	458.155	55.403	271.102
14	522571	22.368	371.882	53.915	-186.696		14	493753	21.134	354.448	42.411	190.391		14	376144	16.1	275.339	57.229	-13.2787		14	361700	15.482	261.804	30.431	133.033		14	485833	20.795	352.766	61.257	-760.356		14	620101	26.542	445.329	53.814	260.33
15	525105	22.476	370.239	67.51	-189.246		15	501950	21.485	357.613	41.03	194.854		15	315306	13.496	227.123	30.606	5.33233		15	350399	14.998	255.477	30.939	125.583		15	467345	20.004	343.884	62.571	-726.71		15	605288	25.908	444.998	56.797	248.664
16	520500	22.279	370.621	74.852	-184.612		16	464940	19.901	331.672	46.017	174.702		16	305899	13.094	219.789	31.679	8.21001		16	335619	14.366	246.119	29.101	115.839		16	457721	19.592	335.373	63.522	-709.197		16	575835	24.648	424.357	57.128	225.468
17	506458	21.678	360.962	70.581	-170.485		17	449253	19.23	322.645	40.866	166.16		17	288792	12.361	206.767	28.714	13.4431		17	318257	13.623	231.389	35.853	104.394		17	445341	19.062	332.955	71.165	-686.666		17	558049	23.886	410.179	54.026	211.46
18	490928	21.013	346.597	56.495	-154.86		18	442643	18.947	317.107	37.587	162.561		18	340706	14.583	254.647	85.966	-2.43772		18	311592	13.337	225.435	33.802	100		18	420093	17.981	326.077	74.731	-640.717		18	540786	23.148	394.809	54.902	197.865
19	481706	20.619	342.193	63.486	-145.582		19	442916	18.958	318.616	41.238	162.709		19	298680	12.785	213.69	33.899	10.4183		19	308060	13.186	221.734	33.802	97.6709		19	395431	16.926	309.852	68.031	-595.836		19	535695	22.93	387.851	55.797	193.856
20	461942	19.773	328.303	54.167	-125.698		20	425136	18.197	308.021	42.521	153.028		20	289550	12.394	206.46	32.48	13.2112		20	294865	12.621	212.308	31.855	88.9724		20	389755	16.683	309.58	75.642	-585.506		20	523717	22.417	380.681	50.074	184.422
21	455329	19.49	327.601	57.664	-119.044		21	424460	18.168	304.632	45.769	152.66		21	282500	12.092	202.338	32.046	15.3678		21	281978	12.07	203.051	33.893	80.4767		21	385492	16.5	306.539	81.86	-577.748		21	525876	22.509	384.638	50.601	186.122
22	449497	19.24	332.831	76.288	-113.178		22	412884	17.673	297.282	45.736	146.357		22	284746	12.188	221.972	85.247	14.6809		22	276911	11.853	200.819	32.38	77.1363		22	377845	16.173	300.415	77.934	-563.832		22	521874	22.338	378.288	44.539	182.971
23	440049	18.836	322.485	63.04	-103.672		23	409363	17.522	293.495	47.618	144.439		23	273702	11.715	215.407	87.242	18.0594		23	267877	11.466	193.955	31.364	71.1811		23	356535	15.261	274.772	56.795	-525.051		23	505484	21.637	368.063	41.853	170.063
24	441313	18.89	319.043	64.291	-104.944		24	409092	17.511	290.513	48.249	144.292		24	198619	8.502	144.193	27.467	41.028		24	257013	11.001	184.264	27.55	64.0187		24	344040	14.726	268.061	52.821	-502.311		24	496213	21.24	362.42	45.656	162.761
25	433906	18.573	313.204	67.143	-97.4917		25	403561	17.274	286.818	46.566	141.28		25	188483	8.068	136.915	28.174	44.1286		25	242214	10.368	174.498	28.362	54.2629		25	341082	14.6	263.181	53.141	-496.927		25	513197	21.967	375.427	44.619	176.137
26	407856	17.458	298.599	57.263	-71.2826		26	399910	17.118	283.837	50.463	139.292		26	184929	7.916	132.48	25.1	45.2158		26	235514	10.081	171.719	31.42	49.8457		26	342014	14.639	270.515	72.342	-498.623		26	458915	19.643	352.071	52.656	133.387
27	406840	17.414	295.531	57.483	-70.2612		27	377581	16.162	272.106	49.409	127.133		27	230069	9.848	189.117	91.713	31.407		27	222736	9.534	159.609	27.118	41.4221		27	311026	13.313	240.684	56.646	-442.23		27	471802	20.195	346.838	44.841	143.535
28	398820	17.071	297.475	69.045	-62.1917		28	378029	16.181	269.376	49.775	127.377		28	183365	7.849	131.357	27.577	45.6943		28	209365	8.962	150.806	24.708	32.6072		28	292801	12.533	215.75	53.027	-409.061		28	469403	20.092	339.049	43.994	141.647
29	387641	16.592	290.409	70.325	-50.9447		29	388317	16.621	280.342	57.074	132.979		29	174703	7.478	132.998	38.622	48.3441		29	199627	8.545	142.037	25.111	26.1877		29	271473	11.62	209.158	51.302	-370.247		29	452616	19.374	328.858	43.989	128.426
30	382350	16.366	286.973	75.808	-45.622		30	380835	16.301	276.869	60.076	128.905		30	159480	6.826	114.254	31.175	53.001		30	190933	8.173	135.609	23.944	20.4561		30	256958	10.999	196.936	48.901	-343.832		30	441341	18.891	320.417	44.338	119.546
31	377975	16.179	286.452	78.459	-41.2204		31	372149	15.929	270.841	69.664	124.175		31	147191	6.3	108.301	31.408	56.7601		31	177518	7.598	125.81	24.918	11.6127		31	103341	4.423	106.462	52.008	-64.2669		31	450032	19.263	334.442	36.173	126.391
32	370501	15.859	278.052	77.679	-33.7009		32	380798	16.3	281.342	86.513	128.885		32	136552	5.845	98.756	32.744	60.0147		32	163900	7.016	119.319	23.523	2.63517		32	52591.5	2.251	95.554	53.186	28.091		32	446014	19.091	334.23	46.574	123.226
33	362329	15.509	276.963	81.88	-25.4787		33	367989	15.751	268.088	68.667	121.91		33	135166	5.786	98.272	33.723	60.4389		33	157244	6.731	111.148	27.261	-1.75307		33	51827.7	2.218	94.709	47.928	29.4811		33	420832	18.013	326.825	44.343	103.394
34	358497	15.345	275.385	82.239	-21.6238		34	482670	20.66	410.516	162.03	184.356		34	117914	5.047	84.084	34.386	65.7164		34	150384	6.437	106.769	25.809	-6.27528		34	56506.4	2.419	88.058	40.056	20.9664		34	429413	18.38	321.839	42.121	110.152
35	355937	15.235	277.192	97.309	-19.0483		35	349618	14.965	254.142	59.468	111.907		35	108032	4.624	77.485	34.537	68.7395		35	140236	6.003	99.818	28.396	-12.9656		35	190824	8.168	155.981	57.878	-223.475		35	422883	18.101	321.744	51.167	105.009
36	355161	15.202	269.102	87.855	-18.2674		36	338661	14.496	245.371	56.186	105.941		36	107142	4.586	86.707	43.353	69.0117		36	128783	5.512	93.059	30.565	-20.5154		36	181196	7.756	153.097	55.807	-205.954		36	416522	17.829	324.37	56.715	100
37	336648	14.41	252.553	81.348	0.35876		37	452452	19.367	391.025	193.827	167.902		37	30979.8	1.326	87.593	29.905	92.3103		37	124823	5.343	89.984	27.421	-23.1266		37	33884.9	1.45	78.021	36.776	62.1348		37	404544	17.316	302.322	41.278	90.5661
38	329408	14.1	246.299	81.794	7.64192		38	453413	19.408	391.985	188.261	168.425		38	40365.7	1.728	56.523	31.061	89.4391		38	120528	5.159	87.515	23.968	-25.9576		38	151757	6.496	120.284	44.891	-152.379		38	375503	16.073	281.181	45.843	67.6946
39	322381	13.799	245.599	84.688	14.7125		39	432428	18.509	378.48	187.07	156.998		39	26397	1.13	58.931	28.763	93.7123		39	117913	5.047	84.671	27.827	-27.6817		39	93524.6	4.003	115.695	47.687	-46.4023		39	373442	15.985	274.387	49.877	66.0715
40	319982	13.696	241.06	87.084	17.1252		40	415554	17.787	358.972	192.796	147.81		40	22159.3	0.948	48.943	27.371	95.0086		40	105091	4.498	80.685	25.674	-36.1348		40	82904.2	3.549	94.937	47.886	-27.0745		40	356440	15.257	260.538	51.098	52.6816
41	305671	13.084	231.845	84.962	31.5241		41	424965	18.19	364.147	191.395	152.935		41	21174.4	0.906	62.037	40.072	95.3099		41	64781.5	2.773	67.513	21.406	-62.7082		41	76867.1	3.29	88.905	50.101	-16.0877		41	503946	21.571	396.425	110.499	168.851
42	295837	12.663	219.996	73.539	41.418		42	417781	17.883	359.709	193.579	149.023		42	16005.6	0.685	47.049	20.086	96.8911		42	54903.5	2.35	57.971	22.78	-69.2202		42	71198.4	3.048	75.853	36.22	-5.77136		42	507089	21.705	392.955	93.076	171.326
43	293559	12.565	216.172	81.913	43.7096		43	420397	17.994	346.619	189.964	150.447		43	15839.1	0.678	45.727	17.168	96.942		43	50695.8	2.17	52.674	19.511	-71.9941		43	66414	2.843	70.905	33.341	2.93566		43	487098	20.85	394.627	106.306	155.582
44	283132	12.119	214.356	87.043	54.1999		44	416365	17.822	349.457	200.848	148.252		44	12273.6	0.525	35.558	16.95	98.0327		44	23239.6	0.995	58.935	23.188	-90.0944		44	32015.4	1.37	76.662	33.748	65.5372		44	467383	20.006	390.151	107.561	140.056
45	274197	11.737	204.616	83.767	63.1893		45	417388	17.866	351.498	201.48	148.809		45	6867.31	0.294	39.779	22.207	99.6866		45	20677.6	0.885	54.034	23.534	-91.7834		45	27668.7	1.184	63.997	29.592	73.4476		45	449528	19.241	356.048	100.281	125.994
46	262175	11.222	195.804	82.161	75.2843		46	377133	16.143	321.033	185.827	126.889		46	5896.83	0.252	36.757	23.334	99.9835		46	21078.1	0.902	55.77	25.096	-91.5193		46	22225.2	0.951	56.206	28.226	83.3541		46	424089	18.152	344.978	97.03	105.959
47	255926	10.955	192.737	82.839	81.5711		47	339106	14.515	273.124	113.668	106.183		47	5111.83	0.219	32.495	20.499	100.224		47	15274.6	0.654	59.702	25.214	-95.3452		47	21118.7	0.904	52.59	21.824	85.3678		47	409388	17.523	328.766	115.536	94.3813
48	245082	10.49	180.252	58.172	92.4818		48	327751	14.029	265.327	116.744	100		48	4063.61	0.174	22.85	9.066	100.544		48	201440	8.622	221.561	155.32	27.3828		48	21198.9	0.907	52.766	37.856	85.2218		48	400683	17.151	320.732	121.749	87.5258
49	233776	10.006	170.482	51.641	103.856		49	321078	13.743	255.353	118.572	96.3667		49	4093.6	0.175	33.905	14.484	100.535		49	18998.1	0.813	77.408	35.208	-92.8905		49	16287.8	0.697	41.808	22.421	94.1594		49	401177	17.172	333.08	109.097	87.9144
50	237609	10.171	183.377	83.765	100		50	315950	13.524	248.081	126.278	93.5745		50	5307.44	0.227	28.429	12.483	100.164		50	132644	5.678	256.2	161.085	-17.9702		50	13078.5	0.56	33.949	21.926	100		50	411640	17.62	331.277	122.991	96.1552
51	225231	9.641	169.341	83.51	112.453		51	359176	15.374	273.517	138.786	117.112		51	5842.75	0.25	35.56	22.529	100		51	14424.1	0.617	60.51	25.01	-95.9059		51	10115.9	0.433	48.566	18.781	105.392		51	400656	17.15	331.821	112.278	87.5045
52	207006	8.861	148.86	62.658	130.79		52	324989	13.911	261.397	151.363	98.4961		52	5628.12	0.241	38.34	30.272	100.066		52	11710	0.501	56.758	17.639	-97.6952		52	8867.01	0.38	45.011	20.215	107.664		52	388291	16.62	315.289	101.616	77.7658
53	195285	8.359	142.574	63.44	142.581		53	337272	14.436	267.033	140.96	105.184		53	4814.39	0.206	35.438	30.083	100.315		53	64220	2.749	127.024	74.506	-63.0784		53	9562.44	0.409	44.317	17.145	106.399		53	376147	16.1	308.402	95.918	68.2021
54	186106	7.966	137.826	70.168	151.817		54	313762	13.43	258.888	138.784	92.3828		54	4789.04	0.205	32.592	29.497	100.322		54	85487	3.659	144.262	149.316	-49.0583		54	5817.82	0.249	33.788	17.527	113.214		54	397249	17.004	326.198	123.659	84.8213
55	175150	7.497	130.473	69.776	162.839		55	306183	13.106	264.779	153.586	88.256		55	3785.6	0.162	30.94	25.618	100.629		55	74386.2	3.184	124.616	174.963	-56.3764		55	4819.88	0.206	31.247	25.088	115.03		55	384550	16.46	329.446	115.229	74.8197
56	164070	7.023	118.359	50.71	173.987		56	289439	12.389	246.476	154.164	79.1388		56	4543.56	0.194	27.161	29.716	100.397		56	42154.9	1.804	105.174	123.43	-77.6246		56	4302.74	0.184	29.323	22.09	115.971		56	376624	16.121	327.496	111.143	68.5774
57	164598	7.045	117.985	57.534	173.456		57	264965	11.341	216.145	138.4	65.8125		57	3449.71	0.148	34.028	16.99	100.732		57	32334.8	1.384	62.62	109.521	-84.0985		57	3833.76	0.164	27.036	23.214	116.824		57	405843	17.372	360.718	154.71	91.5892
58	155172	6.642	117.308	59.848	182.939		58	256193	10.966	223.044	131.364	61.0361		58	4004.03	0.171	32.855	13.026	100.562		58	46796.9	2.003	70.654	38.419	-74.5644		58	3129.46	0.134	29.686	17.046	118.106		58	351806	15.059	312.482	132.643	49.0324
59	143689	6.15	106.188	60.26	194.491		59	266410	11.403	241.895	141.388	66.5991		59	3800.39	0.163	39.254	13.404	100.625		59	48929.3	2.094	95.635	59.937	-73.1586		59	2883.56	0.123	21.43	23.416	118.554		59	306733	13.129	238.138	98.95	13.5343
60	133614	5.719	105.926	75.893	204.628		60	266953	11.427	231.503	144.315	66.895		60	3892.49	0.167	34.962	15.972	100.597		60	47781.4	2.045	79.414	35.242	-73.9154		60	3393.1	0.145	30.876	16.74	117.626		60	299670	12.827	245.206	87.69	7.97186
61	67058.8	2.87	177.776	120.205	271.588		61	267832	11.464	226.687	146.623	67.3737		61	3865.03	0.165	32.372	16.35	100.605		61	3829.54	0.164	25.243	25.402	-102.89		61	3918.69	0.168	44.595	21.65	116.67		61	380483	16.286	369.581	191.7	71.6167
62	56151.5	2.403	63.529	31.411	282.561		62	147336	6.307	111.864	70.902	1.76178		62	3666.03	0.157	24.893	11.999	100.666		62	4876.49	0.209	14.713	40.714	-102.2		62	2643.16	0.113	30.237	14.405	118.991		62	397402	17.01	381.967	174.178	84.9414
63	57549.1	2.463	154.457	94.71	281.155		63	245056	10.489	225.852	158.963	54.9715		63	3051.72	0.131	26.148	13.489	100.854		63	3511.4	0.15	11.83	41.324	-103.1		63	2694.7	0.115	18.856	23.032	118.897		63	423294	18.118	373.278	172.959	105.333
64	57209.9	2.449	159.378	92.302	281.497		64	238002	10.187	226.827	165.769	51.1305		64	2957.92	0.127	21.411	7.757	100.882		64	2679.07	0.115	25.38	16.596	-103.649		64	2952.01	0.126	18.095	22.653	118.429		64	389407	16.668	382.545	179.204	78.6449
65	51848.8	2.219	139.094	82.462	286.89		65	234559	10.04	221.288	160.822	49.256		65	2125.6	0.091	15.565	5.846	101.137		65	1877.59	0.08	23.067	15.68	-104.177		65	2518.52	0.108	23.653	11.449	119.218		65	319246	13.665	267.125	121.037	23.3895
66	58348.5	2.498	154.916	59.836	280.351		66	199213	8.527	178.967	109.002	30.0094		66	2518.95	0.108	21.083	6.671	101.017		66	3597.59	0.154	22.201	9.076	-103.043		66	2938.49	0.126	29.638	4.701	118.454		66	356088	15.242	260.583	121.668	52.4047
67	56904.4	2.436	163.641	80.94	281.804		67	212574	9.099	210.763	155.596	37.2845		67	2129.4	0.091	24.145	16.779	101.136		67	2492.75	0.107	3.155	28.211	-103.772		67	2917.36	0.125	29.215	7.578	118.492		67	332359	14.226	301.177	180.757	33.7162
68	52240.4	2.236	136.573	72.572	286.496		68	167821	7.183	131.714	85.449	12.9159		68	2125.18	0.091	24.048	16.867	101.137		68	2121.8	0.091	9.92	31.701	-104.016		68	2719.21	0.116	28.688	12.355	118.853		68	286162	12.249	223.29	103.356	-2.6666
69	47757.7	2.044	143.619	61.21	291.006		69	199360	8.533	199.308	160.18	30.0892		69	2128.55	0.091	24.367	16.672	101.136		69	2515.14	0.108	8.855	35.881	-103.757		69	4298.94	0.184	36.923	15.437	115.978		69	307081	13.144	295.63	197.374	13.8082
70	43538.6	1.864	136.369	60.864	295.251		70	247888	10.61	190.277	147.155	56.5134		70	2316.99	0.099	29.256	11.587	101.079		70	2032.22	0.087	13.516	13.477	-104.075		70	3963.05	0.17	31.817	16.92	116.589		70	294775	12.617	287.96	202.568	4.11703
71	39480.9	1.69	122.58	57.83	299.333		71	144999	6.206	282.193	161.332	0.489102		71	2090.53	0.089	23.758	16.859	101.148		71	1891.53	0.081	22.861	15.912	-104.168		71	3006.93	0.129	24.585	13.967	118.329		71	313657	13.426	302.748	208.763	18.9873
72	38235	1.637	129.195	54.523	300.587		72	119550	5.117	288.738	147.454	-13.3682		72	2266.29	0.097	35.642	15.639	101.094		72	1883.93	0.081	22.733	15.946	-104.173		72	3825.32	0.164	30.643	13.853	116.84		72	234430	10.034	203.495	86.726	-43.408
73	35528	1.521	133.965	49.495	303.31		73	80285.1	3.436	136.296	81.287	-34.7486		73	2107.43	0.09	23.873	17.098	101.143		73	1906.74	0.082	22.916	16.045	-104.158		73	3584.91	0.153	29.463	12.334	117.277		73	249277	10.67	198.722	88.268	-31.7154
74	36553	1.565	122.333	62.761	302.279		74	79832.6	3.417	141.863	76.453	-34.995		74	2096.87	0.09	23.965	16.965	101.146		74	1878.86	0.08	22.582	16.021	-104.176		74	2310.23	0.099	26.247	10.903	119.597		74	213041	9.119	182.417	93.124	-60.2535
75	31665.5	1.355	128.727	50.706	307.196		75	55192.4	2.362	119.811	75.773	-48.4119		75	2106.16	0.09	23.971	16.969	101.143		75	2008.57	0.086	4.428	27.578	-104.091		75	2023.78	0.087	23.423	16.53	120.118		75	220632	9.444	177.424	109.434	-54.2754
76	35352.3	1.513	126.418	67.421	303.487		76	101970	4.365	277.301	147.542	-22.9411		76	2109.12	0.09	24.298	16.712	101.142		76	2840.05	0.122	26.308	17.205	-103.543		76	2134.05	0.091	0.18	20.45	119.918		76	212429	9.093	179.143	93.313	-60.7356
77	23538.3	1.008	80.075	51.666	315.373		77	94406.4	4.041	271.639	144.979	-27.0594		77	2111.66	0.09	24.029	16.977	101.141		77	2036.45	0.087	22.035	11.104	-104.072		77	2101.09	0.09	28.947	16.118	119.978		77	218180	9.339	178.272	91.076	-56.206
78	23525.2	1.007	77.068	51.077	315.386		78	78367.4	3.354	131.898	72.289	-35.7928		78	2098.14	0.09	23.871	16.969	101.146		78	2835.4	0.121	25.351	22.803	-103.546		78	2549.79	0.109	31.104	12.812	119.161		78	174246	7.458	201.896	96.157	-90.8066
79	19865.1	0.85	98.179	36.279	319.069		79	95094.2	4.07	214.138	91.157	-26.6848		79	2087.15	0.089	23.847	16.695	101.149		79	1975.61	0.085	13.378	14.446	-104.112		79	2884.41	0.123	29.882	10.861	118.552		79	160607	6.875	212.387	101.917	-101.548
80	25079.2	1.073	75.349	42.348	313.823		80	87067.1	3.727	199.467	74.946	-31.0557		80	2077.86	0.089	23.744	16.693	101.152		80	2488.1	0.106	16.696	15.397	-103.775		80	2889.05	0.124	27.777	10.413	118.544		80	192358	8.234	302.042	173.182	-76.5426
81	29181.7	1.249	94.903	41.444	309.695		81	57626.5	2.467	136.444	80.699	-47.0866		81	2086.73	0.089	24.021	16.606	101.149		81	2883.56	0.123	19.564	14.92	-103.514		81	3229.59	0.138	20.884	25.738	117.924		81	175580	7.515	218.914	105.488	-89.7565
82	23429.7	1.003	82.177	44.094	315.482		82	107496	4.601	203.485	103.728	-19.9317		82	2085.88	0.089	23.938	16.547	101.149		82	3417.6	0.146	26.371	18.176	-103.162		82	3586.18	0.154	24.191	30.143	117.275		82	147957	6.333	192.929	92.659	-111.511
83	14647.7	0.627	76.183	28.239	324.318		83	69066.1	2.956	139.9	80.512	-40.8575		83	2051.24	0.088	22.999	17.062	101.16		83	3584.07	0.153	29.175	16.631	-103.052		83	2742.87	0.117	22.951	7.682	118.81		83	127716	5.467	181.062	86.933	-127.452
84	14249.7	0.61	88.025	23.789	324.718		84	94634.9	4.051	204.881	99.21	-26.9349		84	2060.11	0.088	23.281	17.075	101.157		84	5289.7	0.226	33.278	38.037	-101.928		84	2401.07	0.103	18.675	7.099	119.432		84	73743.1	3.156	164.451	110.502	-169.959
85	14919.3	0.639	73.871	40.647	324.045		85	87912.5	3.763	199.383	101.844	-30.5953		85	2074.05	0.089	23.14	17.29	101.153		85	3544.78	0.152	24.642	32.971	-103.078		85	2262.07	0.097	25.36	13.239	119.685		85	117143	5.014	193.995	109.372	-135.779
86	15560.7	0.666	62.002	39.921	323.399		86	62296.4	2.667	156.268	105.548	-44.5437		86	1977.3	0.085	22.355	17.033	101.182		86	4062.34	0.174	26.469	22.972	-102.737		86	2014.9	0.086	23.069	16.68	120.134		86	102343	4.381	182.988	108.868	-147.435
87	6274.97	0.269	40.339	18.244	332.741		87	43895.2	1.879	103.079	95.226	-54.5634		87	2035.61	0.087	23.636	16.151	101.165		87	4029.8	0.172	18.116	29.762	-102.758		87	2043.63	0.087	31.027	12.013	120.082		87	81639.3	3.494	121.498	66.171	-163.74
88	6248.35	0.267	40.547	16.138	332.768		88	77692.3	3.326	166.04	153.684	-36.1604		88	2039.83	0.087	23.882	16.007	101.163		88	4572.3	0.196	17.931	36.048	-102.401		88	2122.64	0.091	16.201	23.219	119.938		88	97551.9	4.176	138.84	84.191	-151.208
89	6026.12	0.258	39.884	18.152	332.992		89	65926.5	2.822	95.556	149.186	-42.5671		89	2033.91	0.087	23.647	16.209	101.165		89	4475.12	0.192	22.495	32.205	-102.465		89	2861.17	0.122	21.955	14.588	118.594		89	107355	4.595	143.414	90.961	-143.487
90	5919.23	0.253	38.83	17.516	333.099		90	71215.3	3.048	113.988	147.078	-39.6872		90	2038.56	0.087	23.768	16.282	101.164		90	5302.8	0.227	21.318	33.385	-101.919		90	2842.58	0.122	22.968	16.118	118.628		90	104545	4.475	161.786	92.881	-145.7
91	7241.65	0.31	26.739	26.942	331.769		91	67124.3	2.873	99.389	148.335	-41.9149		91	2066.03	0.088	23.819	16.699	101.155		91	15790.1	0.676	51.63	44.588	-95.0054		91	2605.14	0.112	25.293	13.087	119.06		91	86963.2	3.722	145.807	93.32	-159.547
92	6898.16	0.295	46.106	24.975	332.115		92	120567	5.161	274.929	190.068	-12.8144		92	2079.12	0.089	23.761	16.826	101.151		92	14318.5	0.613	51.257	42.015	-95.9755		92	3375.78	0.144	40.58	19.865	117.658		92	86324.4	3.695	142.371	98.676	-160.05
93	6630.72	0.284	48.5	18.916	332.384		93	70343.7	3.011	143.948	90.231	-40.1618		93	2059.69	0.088	23.962	16.456	101.157		93	13553	0.58	41.271	44.032	-96.4802		93	4212.32	0.18	34.684	23.482	116.135		93	74130.6	3.173	202.65	91.92	-169.653
94	14677.2	0.628	42.131	19.797	324.288		94	73148.7	3.131	107.539	195.096	-38.6345		94	2069.83	0.089	23.988	16.551	101.154		94	13473.9	0.577	42.402	49.65	-96.5323		94	3483.93	0.149	34.355	18.013	117.461		94	83330.5	3.567	154.605	99.069	-162.408
95	15696.7	0.672	45.083	23.683	323.262		95	63091.1	2.701	174.974	94.155	-44.111		95	2085.46	0.089	23.806	16.715	101.149		95	13235.7	0.567	46.672	50.882	-96.6894		95	3490.27	0.149	28.552	19.328	117.449		95	82670.6	3.539	159.005	106.189	-162.928
96	16941.8	0.725	48.546	25.287	322.01		96	46902.6	2.008	106.861	88.161	-52.9259		96	2084.19	0.089	23.731	16.773	101.15		96	13936.2	0.597	47.877	50.347	-96.2276		96	2712.03	0.116	24.347	19.614	118.866		96	73872.4	3.162	223.305	109.306	-169.857
97	8890.67	0.381	50.976	19.88	330.11		97	46265.9	1.98	159.409	82.443	-53.2726		97	2082.93	0.089	23.616	16.869	101.15		97	9620.33	0.412	41.479	46.033	-99.0728		97	3049.61	0.131	26.371	18.826	118.251		97	80568.6	3.449	144.886	102.152	-164.583
98	17277.7	0.74	43.913	21.109	321.672		98	89958.3	3.851	119.631	176.82	-29.4814		98	2076.59	0.089	23.86	16.504	101.152		98	9990.43	0.428	39.361	32.668	-98.8288		98	2864.97	0.123	22.237	20.88	118.587		98	93279.6	3.993	152.569	68.417	-154.573
99	8336.35	0.357	43.64	20.862	330.668		99	62517.3	2.676	146.664	84.518	-44.4234		99	2064.34	0.088	23.638	16.604	101.156		99	2217.28	0.095	21.221	14.954	-103.953		99	2048.7	0.088	23.529	16.638	120.073		99	92546.5	3.961	158.154	84.671	-155.15
100	17045.8	0.73	43.365	18.363	321.905		100	66954.4	2.866	106.211	160.858	-42.0073		100	2062.64	0.088	23.61	16.617	101.156		100	6847.88	0.293	54.451	29.019	-100.9		100	2047.01	0.088	23.59	16.646	120.076		100	83930.9	3.593	145.802	88.328	-161.935
101	8475.77	0.363	32.947	15.196	330.527		101	41181.5	1.763	117.232	88.944	-56.0411		101	2052.93	0.088	23.611	16.466	101.159		101	9919.03	0.425	30.82	53.717	-98.8759		101	2045.74	0.088	23.375	16.772	120.078		101	76488.6	3.274	133.504	93.809	-167.796
102	8344.38	0.357	30.861	18.616	330.659		102	3973.61	0.17	24.741	35.157	-76.3013		102	2055.46	0.088	23.965	16.073	101.159		102	7926.94	0.339	57.714	27.891	-100.189		102	2044.48	0.088	23.327	16.799	120.081		102	63578.2	2.721	92.532	59.691	-177.964
103	8967.99	0.384	33.244	17.131	330.032		103	39976.5	1.711	21.516	100.976	-56.6972		103	2048.7	0.088	23.829	16.153	101.161		103	2199.96	0.094	23.529	10.743	-103.965		103	2034.34	0.087	23.202	16.818	120.099		103	60748.3	2.6	97.179	53.893	-180.193
104	8596.18	0.368	30.928	16.058	330.406		104	3675.75	0.157	29.074	15.357	-76.4635		104	2008.99	0.086	23.614	15.782	101.173		104	1932.52	0.083	22.963	16.245	-104.141		104	2036.45	0.087	23.246	16.936	120.095		104	43604.1	1.866	83.047	65.053	-193.695
105	7566.13	0.324	27.184	18.242	331.442		105	7655.28	0.328	36.371	63.05	-74.2966		105	2533.73	0.108	10.711	25.083	101.012		105	7951.87	0.34	44.47	18.807	-100.173		105	2033.07	0.087	23.342	16.766	120.101		105	43473.1	1.861	109.099	80.28	-193.798
106	5988.09	0.256	29.525	16.611	333.03		106	34108.4	1.46	86.47	64.561	-59.8925		106	2024.2	0.087	23.816	15.747	101.168		106	8420.42	0.36	49.606	27.51	-99.8638		106	2026.31	0.087	23.588	16.488	120.114		106	35351	1.513	51.514	114.841	-200.195
107	7095.04	0.304	35.276	13.071	331.916		107	8189.32	0.351	33.306	57.855	-74.0058		107	1987.86	0.085	23.806	15.199	101.179		107	1894.91	0.081	22.95	15.927	-104.166		107	2029.69	0.087	23.396	16.641	120.107		107	36679.8	1.57	89.616	56.013	-199.148
108	8606.33	0.368	41.993	15.027	330.396		108	31649.5	1.355	35.499	83.134	-61.2314		108	2037.72	0.087	23.665	16.355	101.164		108	1900.83	0.081	22.746	16.143	-104.162		108	2027.15	0.087	23.417	16.592	120.112		108	28397.1	1.215	56.022	98.43	-205.671
HU74
CTRL1	Area µm²	area fraction (%)	withd µm	SD	% closure		CTRL2	Area µm²	area fraction (%)	withd µm	SD	% closure		CTRL3	Area µm²	area fraction (%)	withd µm	SD			siSAM2-1	Area µm²	area fraction (%)	withd µm	SD	% closure		siSAM2-2	Area µm²	area fraction (%)	withd µm	SD	% closure		siSAM2-3	Area µm²	area fraction (%)	withd µm	SD	% closure		siSAM4-1	Area µm²	area fraction (%)	withd µm	SD	% closure
1	517115	22.134	374.843	36.433	-248.923		1	496930	21.27	352.412	38.006	-122.883		1	710319	30.404	512.592	49.05			1	1.08459e+06	46.424	734.042	25.407	717.079		1	1.02961e+06	44.071	752.542	34.315	1651.35		1	1.02162e+06	43.729	722.762	33.89	-185.257		1	980122	41.953	701.932	28.944	267.695
2	522439	22.362	378.259	35.259	-252.584		2	498291	21.329	351.948	38.065	-123.578		2	724782	31.023	531.305	54.114			2	1.06747e+06	45.691	727.493	28.049	705.412		2	1.01507e+06	43.449	740.164	34.589	1627.95		2	1.00463e+06	43.002	711.301	33.078	-179.179		2	974372	41.707	695.036	39.453	266.125
3	513378	21.974	371.275	38.093	-246.352		3	484188	20.725	343.035	37.81	-116.379		3	671174	28.729	492.914	55.459			3	1.05821e+06	45.295	720.153	29.884	699.104		3	973950	41.689	724.403	38.448	1561.75		3	983596	42.101	695.567	33.923	-171.65		3	961321	41.148	687.148	41.259	262.56
4	461839	19.768	347.824	41.146	-210.907		4	484293	20.729	343.938	45.949	-116.432		4	677252	28.989	500.735	66.306			4	1.04084e+06	44.551	708.743	32.974	687.265		4	954853	40.871	694.437	61.284	1531.01		4	975008	41.734	689.479	34.921	-168.577		4	954765	40.867	683.568	41.431	260.77
5	450429	19.28	335.457	38.037	-203.06		5	467861	20.026	332.145	40.834	-108.045		5	639030	27.353	474.066	70.058			5	1.03164e+06	44.158	703.93	35.264	680.995		5	928253	39.733	684.503	57.412	1488.19		5	967340	41.406	684.494	32.645	-165.832		5	938877	40.187	673.308	39.694	256.43
6	492038	21.061	361.215	53.86	-231.676		6	451910	19.343	319.697	40.899	-99.9027		6	619096	26.499	456.027	63.011			6	1.01705e+06	43.533	692.729	36.022	671.056		6	919107	39.341	670.845	55.68	1473.46		6	953791	40.826	674.159	32.233	-160.984		6	924322	39.564	661.893	38.715	252.455
7	495184	21.196	365.457	61.173	-233.84		7	447106	19.138	315.621	42.287	-97.4504		7	616303	26.38	460.278	63.328			7	1.00307e+06	42.935	685.097	36.537	661.531		7	911540	39.017	659.475	56.853	1461.28		7	941114	40.283	664.446	32.572	-156.447		7	912647	39.065	652.66	39.474	249.266
8	408893	17.502	302.899	40.517	-174.494		8	426334	18.249	303.682	39.805	-86.8476		8	595313	25.481	452.322	71.488			8	980418	41.965	671.481	39.458	646.091		8	878124	37.587	650.784	58.455	1407.48		8	934185	39.986	660.071	30.901	-153.967		8	881002	37.71	637.56	44.295	240.623
9	382855	16.388	286.774	46.751	-156.586		9	398805	17.07	288.849	39.74	-72.7956		9	717980	30.732	559.952	107.718			9	969245	41.487	661.514	38.933	638.477		9	864067	36.985	630.206	58.891	1384.86		9	921751	39.454	652.063	29.163	-149.518		9	868726	37.185	627.741	44.955	237.27
10	389842	16.687	286.864	40.455	-161.392		10	391381	16.752	283.623	41.876	-69.0057		10	698291	29.889	536.156	112.585			10	954802	40.869	655.694	45.204	628.634		10	864293	36.995	626.851	54.635	1385.22		10	909549	38.932	643.281	29.707	-145.151		10	863088	36.943	623.983	42.229	235.73
11	371388	15.897	275.843	44.921	-148.701		11	377388	16.154	271.13	42.858	-61.8634		11	652648	27.936	489.768	91.299			11	944030	40.408	647.392	37.634	621.294		11	831055	35.572	616.602	60.426	1331.71		11	896455	38.371	634.308	27.829	-140.465		11	837951	35.867	615.144	41.897	228.865
12	355591	15.221	269.787	42.673	-137.836		12	372128	15.928	268.595	44.289	-59.1782		12	645093	27.612	499.191	103.138			12	922795	39.499	631.591	35.385	606.822		12	813876	34.837	598.599	59.501	1304.05		12	881842	37.746	624.789	26.132	-135.236		12	846164	36.219	612.006	42.462	231.108
13	363552	15.561	268.868	39.218	-143.312		13	372692	15.953	269.921	43.617	-59.4661		13	548718	23.487	412.769	56.02			13	910433	38.97	627.624	40.737	598.399		13	804301	34.427	590.958	55.164	1288.64		13	866250	37.079	617.93	28.14	-129.656		13	830155	35.534	603.246	40.89	226.736
14	346845	14.846	263.464	45.111	-131.821		14	351715	15.055	254.47	46.759	-48.7586		14	515191	22.052	385.542	57.801			14	888386	38.026	612.341	48.227	583.374		14	789364	33.788	579.031	52.456	1264.59		14	853635	36.539	605.067	30.936	-125.141		14	820213	35.108	592.07	39.523	224.02
15	401643	17.192	321.445	85.527	-169.508		15	346061	14.813	250.497	47.233	-45.8726		15	514343	22.016	384.267	50.721			15	868879	37.191	603.676	47.748	570.081		15	762737	32.648	568.42	45.526	1221.73		15	838114	35.874	597.393	30.923	-119.587		15	802576	34.353	585.903	40.707	219.203
16	335591	14.364	252.18	44.449	-124.082		16	349326	14.952	248.911	48.109	-47.5391		16	511995	21.915	372.723	48.489			16	870226	37.249	601.974	51.796	570.999		16	769749	32.948	563.471	46.035	1233.02		16	830161	35.534	590.421	32.38	-116.741		16	802976	34.37	582.662	39.167	219.312
17	325859	13.948	243.843	44.447	-117.388		17	330368	14.141	236.384	46.041	-37.8623		17	618651	26.48	467.936	104.57			17	854159	36.561	591.855	45.44	560.049		17	750484	32.123	554.974	48.011	1202		17	813503	34.821	578.949	34.887	-110.779		17	781893	33.468	572.133	44.122	213.554
18	335140	14.345	247.047	40.962	-123.771		18	326787	13.988	231.552	44.842	-36.0343		18	499358	21.374	373.178	66.501			18	845014	36.17	583.622	45.46	553.817		18	746489	31.952	549.138	43.928	1195.57		18	804146	34.42	574.022	36.739	-107.431		18	773141	33.093	564.301	45.336	211.164
19	375669	16.08	292.496	84.895	-151.645		19	315182	13.491	223.502	44.661	-30.1102		19	479893	20.541	355.049	47.447			19	829933	35.524	577.254	46.848	543.54		19	753968	32.272	546.944	42.706	1207.61		19	793428	33.962	565.258	37.196	-103.595		19	770411	32.976	557.216	45.561	210.418
20	351408	15.042	260.904	55.949	-134.96		20	307731	13.172	217.528	43.296	-26.307		20	473127	20.252	349.342	48.539			20	813010	34.8	564.802	48.056	532.007		20	740841	31.711	541.448	43.62	1186.48		20	782260	33.484	557.213	37.457	-99.5989		20	765749	32.777	553.877	48.404	209.145
21	305589	13.08	226.885	41.004	-103.448		21	305339	13.07	215.547	44.063	-25.0862		21	490280	20.986	378.918	97.909			21	808459	34.605	562.162	47.965	528.906		21	735206	31.469	534.733	51.723	1177.41		21	766721	32.818	548.463	37.126	-94.0378		21	762090	32.62	550.986	48.604	208.145
22	337079	14.428	261.787	69.696	-125.105		22	294883	12.622	209.317	44.36	-19.7491		22	482157	20.638	372.295	86.025			22	798577	34.182	554.742	50.218	522.171		22	723306	30.96	528.811	39.455	1158.25		22	704814	30.169	510.033	42.133	-71.8834		22	751683	32.175	542.865	47.831	205.303
23	324927	13.908	243.343	58.202	-116.748		23	280286	11.997	201.417	47.968	-12.2978		23	461431	19.751	343.384	58.695			23	783653	33.543	544.962	48.96	512.002		23	711092	30.437	519.872	38.303	1138.59		23	698163	29.884	503.156	40.508	-69.5032		23	731209	31.298	534.322	45.298	199.711
24	288042	12.329	213.303	40.691	-91.3799		24	295251	12.638	218.493	90.158	-19.9368		24	468192	20.04	349.369	71.806			24	778773	33.334	541.279	51.824	508.676		24	703465	30.111	514.118	38.246	1126.31		24	690502	29.556	496.982	40.6	-66.7619		24	727473	31.138	529.55	44.176	198.691
25	335431	14.358	253.519	74.498	-123.971		25	273878	11.723	199.744	65.227	-9.02701		25	455865	19.513	339.935	52.643			25	771209	33.01	539.875	48.428	503.521		25	704413	30.151	514.203	39.864	1127.83		25	680411	29.124	495.784	39.543	-63.1505		25	706037	30.221	520.979	46.428	192.836
26	313393	13.414	235.866	56.676	-108.815		26	266091	11.39	196.064	69.748	-5.05234		26	558443	23.903	439.722	104.919			26	748446	32.036	528.264	51.22	488.009		26	687184	29.414	499.54	40.154	1100.1		26	714208	30.571	509.182	38.583	-75.2453		26	702731	30.079	515.577	44.146	191.933
27	343000	14.682	267.796	105.942	-129.177		27	273259	11.696	198.219	74.806	-8.71128		27	442195	18.927	338.93	70.553			27	742470	31.78	530.841	52.457	483.936		27	687299	29.419	496.028	41.361	1100.28		27	706793	30.253	502.672	36.209	-72.5918		27	696457	29.811	509.92	43.844	190.219
28	301929	12.924	226.727	51.941	-100.931		28	251771	10.777	187.347	72.871	2.25735		28	442989	18.961	344.347	96.661			28	726973	31.117	522.526	55.667	473.375		28	676907	28.974	489.999	40.17	1083.55		28	692668	29.649	492.738	38.918	-67.5369		28	674530	28.872	499.335	45.71	184.231
29	296815	12.705	227.111	70.32	-97.4133		29	243164	10.408	181.26	73.033	6.65105		29	550952	23.583	455.479	105.58			29	714826	30.597	511.15	64.83	465.098		29	669724	28.667	483.947	39.783	1071.99		29	684963	29.319	488.182	38.699	-64.7797		29	670934	28.718	492.499	48.086	183.249
30	306746	13.13	238.577	83.969	-104.243		30	246859	10.566	182.152	76.689	4.76465		30	438721	18.779	341.76	87.521			30	710260	30.402	502.245	63.036	461.986		30	661267	28.305	482.005	42.989	1058.37		30	678892	29.059	485.832	39.798	-62.6068		30	670000	28.678	494.955	48.041	182.994
31	285808	12.234	216.464	65.784	-89.8437		31	237372	10.16	175.845	75.404	9.60715		31	535090	22.904	432.397	105.683			31	700292	29.975	500.073	61.418	455.194		31	639818	27.386	467.342	45.442	1023.85		31	666517	28.529	475.868	39.94	-58.1782		31	654320	28.007	481.469	51.525	178.711
32	279415	11.96	216.869	66.275	-85.4471		32	235303	10.072	172.995	73.398	10.6633		32	528685	22.63	427.402	123.142			32	684187	29.286	487.603	65.009	444.218		32	633894	27.133	463.185	39.749	1014.31		32	654419	28.011	467.153	39.917	-53.8488		32	663558	28.403	495.732	54.046	181.234
33	233489	9.994	175.366	44.348	-53.8615		33	240354	10.288	175.541	78.108	8.08521		33	443298	18.975	349.242	100.771			33	636559	27.247	451.579	68.329	411.761		33	622307	26.637	455.6	40.779	995.655		33	648417	27.755	463.815	42.025	-51.7009		33	655002	28.036	490.706	47.842	178.897
34	301333	12.898	233.781	107.509	-100.521		34	224707	9.618	159.707	59.871	16.0719		34	430638	18.433	336.461	100.01			34	665122	28.47	475.643	73.432	431.226		34	610415	26.128	445.609	41.729	976.51		34	633825	27.13	453.408	40.316	-46.479		34	643792	27.557	471.898	50.591	175.835
35	297876	12.75	219.722	78.878	-98.1433		35	225759	9.663	165.596	83.745	15.5349		35	416292	17.819	338.817	98.321			35	662735	28.367	475.254	77.778	429.599		35	603317	25.824	446.196	45.919	965.084		35	621165	26.588	446.064	42.896	-41.9486		35	638158	27.315	475.779	47.829	174.297
36	285631	12.226	221.197	82.628	-89.7217		36	215513	9.225	152.713	60.664	20.7651		36	426322	18.248	328.702	96.426			36	651265	27.876	471.67	79.778	421.783		36	590359	25.269	433.397	42.321	944.223		36	607826	26.017	438.296	42.553	-37.1749		36	628525	26.903	462.636	48.852	171.665
37	266665	11.414	206.918	78.516	-76.678		37	210223	8.998	149.278	61.302	23.4652		37	390616	16.72	318.98	96.78			37	635927	27.22	463.251	75.663	411.331		37	579419	24.801	422.426	50.674	926.611		37	604286	25.866	432.028	42.783	-35.908		37	625781	26.786	457.663	48.188	170.916
38	295320	12.641	229.948	100.959	-96.3856		38	209412	8.964	152.456	67.312	23.8795		38	390548	16.717	319.579	95.696			38	632529	27.074	454.403	80.126	409.015		38	573105	24.531	420.327	45.519	916.446		38	589218	25.221	422.875	48.229	-30.5157		38	622347	26.639	459.169	56.93	169.978
39	261677	11.201	206.774	77.767	-73.2478		39	199505	8.54	144.142	63.771	28.9364		39	585204	25.049	513.667	148.898			39	633884	27.132	468.564	87.816	409.938		39	555462	23.776	407.333	48.878	888.045		39	585559	25.064	421.077	45.137	-29.2063		39	625348	26.767	460.499	51.692	170.798
40	240025	10.274	183.164	62.655	-58.3567		40	193261	8.272	149.095	86.664	32.1235		40	490198	20.982	420.685	103.846			40	608925	26.064	434.806	82.118	392.929		40	558430	23.903	410.813	57.09	892.822		40	568238	24.323	412.829	44.609	-23.0078		40	617886	26.448	457.594	52.567	168.76
41	270690	11.586	249.461	142.106	-79.4465		41	189285	8.102	138.777	67.967	34.1529		41	397689	17.022	318.586	103.282			41	614505	26.303	457.287	94.52	396.732		41	544958	23.326	399.282	46.907	871.134		41	565771	24.217	411.212	44.368	-22.1249		41	611009	26.153	452.538	55.17	166.882
42	240045	10.275	191.69	85.837	-58.3709		42	174316	7.461	126.192	62.467	41.7938		42	365610	15.649	313.962	107.651			42	607549	26.005	450.852	96.358	391.991		42	534907	22.896	389.739	47.128	854.953		42	547997	23.456	401.7	44.012	-15.7643		42	593569	25.407	435.134	48.759	162.118
43	242056	10.361	205.519	108.548	-59.7537		43	172661	7.39	137.545	95.769	42.639		43	353623	15.136	257.096	45.599			43	604131	25.859	451.747	93.614	389.662		43	521703	22.331	388.399	42.78	833.697		43	540429	23.132	393.435	47.087	-13.0559		43	594394	25.442	439.431	59.892	162.343
44	263521	11.28	274.838	160.549	-74.5161		44	178148	7.625	139.517	100.464	39.838		44	340914	14.592	274.709	55.128			44	612381	26.212	458.715	96.053	395.285		44	508507	21.766	373.952	52.261	812.452		44	535095	22.904	397.208	53.233	-11.1472		44	598884	25.634	443.581	68.404	163.57
45	210129	8.994	168.276	76.023	-37.7962		45	166299	7.118	134.481	103.423	45.886		45	332538	14.234	261.197	48.266			45	586625	25.11	445.933	96.788	377.733		45	496576	21.255	369.697	58.26	793.246		45	523361	22.402	387.213	55.531	-6.94784		45	584795	25.031	441.527	60.143	159.722
46	222832	9.538	199.489	107.442	-46.5322		46	167193	7.156	125.733	79.838	45.4297		46	516818	22.122	522.159	254.256			46	592768	25.373	443.747	93.345	381.919		46	488647	20.916	362.616	53.199	780.482		46	511340	21.887	371.828	47.437	-2.64611		46	583549	24.978	445.854	69.577	159.382
47	252224	10.796	262.81	161.731	-66.7469		47	169185	7.242	126.031	80.201	44.4132		47	355566	15.219	299.064	115.171			47	579586	24.808	435.39	93.337	372.935		47	480443	20.565	356.309	57.312	767.274		47	508313	21.758	373.888	47.269	-1.56263		47	578904	24.779	429.294	68.633	158.113
48	199477	8.538	182.302	108.837	-30.4703		48	139681	5.979	151.578	86.225	59.4734		48	473781	20.279	415.556	158.422			48	551038	23.586	407.318	80.675	353.481		48	476206	20.383	353.589	69.986	760.452		48	498636	21.343	362.373	48.445	1.90025		48	576150	24.661	440.988	70.504	157.361
49	222770	9.535	211.553	125.894	-46.4898		49	137427	5.882	148.042	88.157	60.6238		49	513452	21.978	481.956	178.649			49	562731	24.087	408.81	78.31	361.449		49	470640	20.145	349.389	71.825	751.493		49	492353	21.074	358.264	51.516	4.14887		49	557854	23.878	418.698	77.414	152.364
50	206537	8.84	176.965	95.551	-35.3255		50	135022	5.779	150.276	97.776	61.8516		50	311962	13.353	256.685	95.983			50	540780	23.147	416.479	80.873	346.49		50	456462	19.538	337.894	51.452	728.668		50	484392	20.734	354.571	51.241	6.99789		50	544626	23.312	423.669	84.902	148.751
51	195646	8.374	202.44	143.461	-27.8355		51	130574	5.589	141.047	97.31	64.1221		51	426765	18.267	389.775	123.511			51	548369	23.472	405.287	87.967	351.662		51	449147	19.225	333.344	65.303	716.893		51	475105	20.336	347.845	48.935	10.3214		51	542073	23.203	436.436	95.506	148.054
52	221139	9.466	239.801	169.604	-45.3685		52	132688	5.68	143.414	104.561	63.0427		52	460190	19.698	391.491	121.425			52	535999	22.943	406.386	104.934	343.232		52	453526	19.413	339.065	66.168	723.942		52	476963	20.416	351.093	54.774	9.65625		52	536421	22.961	409.158	81.927	146.51
53	160365	6.864	194.034	109.876	-3.57111		53	105238	4.505	189.14	106.625	77.0545		53	278690	11.929	208.393	53.653			53	513527	21.981	398.213	96.653	327.918		53	439152	18.797	334.071	67.255	700.802		53	465911	19.943	343.893	53.229	13.6113		53	527735	22.589	406.373	77.282	144.137
54	155658	6.663	190.77	113.111	-0.334156		54	80661.2	3.453	202.724	91.517	89.5996		54	395718	16.938	364.033	134.93			54	488652	20.916	362.815	78.507	310.967		54	432029	18.492	327.255	70.083	689.334		54	453252	19.401	333.281	53.145	18.1418		54	513157	21.965	384.66	64.152	140.156
55	152618	6.533	170.808	81.61	1.75621		55	99488.6	4.258	242.051	87.788	79.9893		55	554720	23.744	516.249	179.457			55	497394	21.29	375.888	91.974	316.924		55	422810	18.098	315.249	64.419	674.492		55	452017	19.348	329.657	52.202	18.5837		55	508368	21.76	384.528	59.665	138.848
56	150766	6.453	172.941	93.442	3.03006		56	85992.3	3.681	212.046	101.655	86.8784		56	497706	21.304	516.3	148.615			56	497630	21.3	388.795	81.7	317.085		56	419736	17.966	316.592	62.026	669.545		56	430292	18.418	319.813	50.249	26.3583		56	510086	21.833	396.234	72.494	139.317
57	144522	6.186	177.41	105.967	7.32469		57	94983.9	4.066	223.854	97.39	82.2887		57	396716	16.981	360.761	174.563			57	472579	20.228	351.012	80.878	300.014		57	399785	17.112	296.437	62.678	637.425		57	422287	18.075	313.682	49.622	29.2231		57	496759	21.263	381.354	86.35	135.677
58	168842	7.227	196.012	96.306	-9.40111		58	101201	4.332	275.457	82.83	79.1152		58	279417	11.96	242.789	100.163			58	491898	21.055	394.111	106.087	313.179		58	396585	16.975	292.415	63.55	632.274		58	421118	18.025	316.599	56.885	29.6413		58	497950	21.314	380.693	71.239	136.002
59	156757	6.71	175.713	80.702	-1.08993		59	79926	3.421	195.403	105.829	89.9749		59	429748	18.395	416.668	137.345			59	462679	19.804	379.672	101.864	293.267		59	385472	16.5	286.367	58.703	614.383		59	410986	17.592	305.469	52.283	33.2673		59	484275	20.729	371.787	71.187	132.267
60	154113	6.597	164.645	82.932	0.728169		60	85579.5	3.663	218.398	121.945	87.0891		60	475869	20.369	464.858	177.457			60	465862	19.941	379.569	93.007	295.436		60	373962	16.007	275.695	57.617	595.854		60	406810	17.413	301.896	55.075	34.7616		60	489799	20.965	375.904	70.349	133.776
61	172972	7.404	178.611	108.882	-12.242		61	93122.4	3.986	194.825	159.79	83.2389		61	229206	9.811	178.818	63.611			61	493071	21.105	377.38	94.282	313.978		61	372369	15.939	282.304	63.38	593.29		61	408969	17.505	301.408	55.775	33.989		61	487141	20.851	375.881	97.076	133.05
62	134677	5.765	149.197	94.734	14.0956		62	81777.4	3.5	172.852	121.827	89.0299		62	254975	10.914	323.363	138.767			62	431148	18.455	341.309	100.833	271.779		62	364604	15.606	285.485	71.281	580.789		62	396194	16.959	292.542	51.651	38.5606		62	465835	19.939	350.066	68.334	127.231
63	139416	5.967	153.902	102.231	10.8362		63	97622	4.179	187.999	129.532	80.9421		63	335511	14.361	321.014	148.836			63	447267	19.145	363.174	94.593	282.764		63	348650	14.923	271.301	67.521	555.105		63	382587	16.376	285.73	52.153	43.4301		63	463295	19.831	349.702	63.029	126.537
64	129378	5.538	171.577	128.453	17.7396		64	94762.1	4.056	195.857	177.628	82.4019		64	288423	12.346	338.07	138.271			64	461484	19.753	352.225	98.863	292.453		64	364275	15.592	291.297	89.398	580.26		64	380133	16.271	297.58	50.282	44.3085		64	458766	19.637	346.963	65.035	125.3
65	126637	5.421	170.19	127.418	19.6245		65	78443.9	3.358	186.081	147.407	90.7314		65	339379	14.527	348.257	172.491			65	429364	18.378	354.056	113.761	270.563		65	345146	14.773	271.834	88.447	549.464		65	366195	15.674	285.099	51.305	49.2964		65	451766	19.337	344.457	69.665	123.388
66	101089	4.327	214.748	165.763	37.1947		66	93296.4	3.993	221.559	189.451	83.15		66	274823	11.763	341.375	133.436			66	425795	18.226	341.952	111.516	268.131		66	343840	14.718	270.561	83.25	547.362		66	368957	15.793	284.396	53.042	48.308		66	457496	19.582	368.103	63.398	124.953
67	96124.2	4.114	173.343	120.128	40.6095		67	90884	3.89	208.323	134.704	84.3815		67	193870	8.298	217.75	74.677			67	406926	17.418	329.77	98.633	255.273		67	330371	14.141	263.5	85.951	525.68		67	354932	15.192	265.212	50.832	53.3269		67	453102	19.394	349.249	100.254	123.753
68	142667	6.107	165.893	108.061	8.6		68	87683.1	3.753	230.902	138.636	86.0153		68	249232	10.668	274.907	121.409			68	399001	17.079	324.583	102.758	249.873		68	315383	13.499	251.552	75.999	501.55		68	350906	15.02	265.831	55.229	54.7678		68	446270	19.102	334.164	78.285	121.887
69	128541	5.502	197.129	153.492	18.3155		69	73169	3.132	39.483	202.438	93.424		69	458229	19.614	434.839	172.487			69	402479	17.228	316.35	102.679	252.242		69	314813	13.475	251.142	84.386	500.633		69	349698	14.968	265.709	54.711	55.1999		69	437041	18.707	327.899	95.164	119.367
70	128743	5.511	170.671	114.486	18.1763		70	64392.8	2.756	32.021	136.106	97.9038		70	196610	8.416	290.484	102.523			70	373226	15.975	288.019	99.338	232.307		70	310457	13.289	258.606	93.881	493.62		70	336302	14.395	256.542	56.898	59.9941		70	437398	18.722	337.627	92.127	119.464
71	119595	5.119	170.019	110.244	24.4675		71	66018.6	2.826	14.042	138.706	97.0739		71	173210	7.414	238.083	125.13			71	374106	16.013	279.708	107.58	232.907		71	299361	12.814	250.404	93.19	475.758		71	329549	14.106	253.39	57.846	62.4105		71	422065	18.066	338.892	62.22	115.276
72	136094	5.825	183.356	115.779	13.1204		72	71448.1	3.058	30.196	129.343	94.3024		72	532758	22.804	540.243	159.376			72	393686	16.851	325.362	101.213	246.25		72	309635	13.253	249.389	92.239	492.296		72	326660	13.982	257.401	70.575	63.4444		72	427501	18.299	356.623	67.956	116.761
73	91092.3	3.899	217.559	119.891	44.0702		73	90079.5	3.856	229.486	172.584	84.7921		73	185547	7.942	156.724	180.368			73	378041	16.181	289.196	96.578	235.589		73	300676	12.87	240.031	75.404	477.875		73	305455	13.075	232.019	61.637	71.0331		73	408873	17.501	320.181	57.054	111.673
74	89004.3	3.81	189.49	120.003	45.5062		74	60286.1	2.58	2.042	141.68	100		74	401782	17.198	385.545	162.34			74	381659	16.336	290.521	93.738	238.054		74	283143	12.12	225.49	70.65	449.648		74	312417	13.373	234.33	52.606	68.5416		74	419555	17.958	331.557	97.943	114.591
75	118219	5.06	174.276	127.557	25.4138		75	83073.2	3.556	193.114	137.952	88.3684		75	436845	18.699	438.444	194.351			75	403394	17.267	335.491	97.449	252.866		75	294853	12.621	232.955	75.452	468.499		75	302465	12.947	231.08	54.068	72.1031		75	416520	17.829	325.62	90.953	113.762
76	80392.5	3.441	156.294	124.541	51.4289		76	78148.6	3.345	188.925	142.788	90.8822		76	259139	11.092	286.729	112.667			76	363778	15.571	303.613	106.854	225.869		76	281660	12.056	219.182	77.399	447.261		76	285521	12.221	220.047	60.304	78.1667		76	404636	17.32	304.053	69.064	110.516
77	101822	4.358	81.524	180.788	36.6912		77	82958.3	3.551	180.974	191.4	88.4271		77	260800	11.163	277.103	107.303			77	378572	16.204	313.464	95.285	235.95		77	283940	12.154	218.518	80.029	450.931		77	280018	11.986	219.158	59.57	80.1361		77	403016	17.25	310.202	65.531	110.073
78	96905.9	4.148	202.156	175.684	40.0719		78	75901.7	3.249	176.235	189.258	92.0291		78	254217	10.881	373.9	160.235			78	366354	15.681	303.822	92.062	227.624		78	278951	11.94	211.796	77.393	442.9		78	276622	11.84	207.806	52.353	81.3514		78	381946	16.349	291.778	67.058	104.319
79	79448.2	3.401	47.595	167.909	52.0783		79	64849.9	2.776	7.585	200.135	97.6704		79	230882	9.883	315.291	159.24			79	345041	14.769	283.337	100.167	213.1		79	260694	11.159	205.265	74.825	413.509		79	268249	11.482	204.225	59.57	84.3478		79	392863	16.816	300.321	66.848	107.3
80	95259	4.077	107.217	199.99	41.2046		80	76809.7	3.288	17.817	208.848	91.5656		80	232964	9.972	316.465	163.232			80	354664	15.181	291.795	105.194	219.658		80	259243	11.097	206.15	75.89	411.173		80	268686	11.501	205.818	54.964	84.1912		80	397496	17.014	299.841	72.201	108.566
81	89788.9	3.843	117.996	161.819	44.9666		81	70675.4	3.025	16.289	193.025	94.6968		81	298048	12.757	320.829	217.682			81	350500	15.003	284.505	107.493	216.82		81	256149	10.964	206.744	75.05	406.193		81	257878	11.038	206.49	69.692	88.0591		81	386331	16.536	290.426	71.34	105.516
82	91518.6	3.917	106.12	167.755	43.777		82	63186.6	2.705	14.754	182.557	98.5195		82	318883	13.649	343.517	150.127			82	334221	14.306	279.848	104.501	205.726		82	240674	10.302	216.391	94.162	381.279		82	262094	11.219	206.715	70.018	86.5502		82	386343	16.537	286.921	70.521	105.52
83	104416	4.469	115.282	223.08	34.9071		83	76818.5	3.288	82.003	148.682	91.5611		83	521699	22.331	568.169	176.416			83	270900	11.595	296.102	105.331	162.575		83	153119	6.554	189.397	83.205	240.328		83	247995	10.615	202.436	59.385	91.5958		83	385117	16.484	286.977	64.586	105.185
84	84246.9	3.606	118.11	142.861	48.778		84	63167.1	2.704	43.303	188.585	98.5294		84	201561	8.628	285.771	85.737			84	329229	14.092	259.377	100.82	202.325		84	148820	6.37	185.599	83.694	233.407		84	226805	9.708	178.907	68.719	99.179		84	385973	16.521	313.398	89.692	105.419
85	61542.2	2.634	120.628	117.469	64.393		85	67576.3	2.893	27.586	184.276	96.2787		85	267955	11.469	292.326	225.448			85	332524	14.233	268.388	112.44	204.57		85	152505	6.528	199.124	91.16	239.34		85	240954	10.314	204.66	63.649	94.1157		85	392412	16.797	334.409	86.069	107.177
86	72109.3	3.087	104.202	161.51	57.1255		86	72575.8	3.106	79.74	183.322	93.7268		86	371261	15.891	340.23	136.123			86	282911	12.11	322.161	123.319	170.76		86	149269	6.389	207.419	93.338	234.131		86	241040	10.317	209.806	66.034	94.085		86	380659	16.294	295.243	78.764	103.967
87	65847.9	2.819	63.321	149.609	61.4318		87	62225.8	2.663	24.864	182.442	99.0099		87	242395	10.375	271.655	250.118			87	321439	13.759	272.588	129.57	197.016		87	134542	5.759	178.814	82.545	210.422		87	224511	9.61	197.836	64.324	100		87	378313	16.193	293.967	81.144	103.326
88	74594.5	3.193	82.902	134.709	55.4164		88	61260	2.622	14.781	174.697	99.5029		88	216829	9.281	263.855	128.029			88	327194	14.005	272.559	108.42	200.938		88	131322	5.621	176.638	90.418	205.238		88	218659	9.359	189.741	59.906	102.094		88	381576	16.333	302.6	81.834	104.218
89	89055.4	3.812	117.199	132.081	45.471		89	64818.7	2.774	23.994	142.886	97.6864		89	245004	10.487	306.365	173.704			89	324366	13.884	267.81	103.543	199.011		89	126289	5.406	160.578	84.276	197.136		89	209235	8.956	182.866	74.441	105.467		89	386967	16.564	315.333	95.043	105.69
90	66193.5	2.833	122.23	143.765	61.1941		90	64822.5	2.775	75.786	165.247	97.6844		90	151975	6.505	222.745	98.308			90	272721	11.673	225.871	109.187	163.816		90	128619	5.505	163.157	86.09	200.887		90	210042	8.991	171.593	76.887	105.178		90	396353	16.965	331.592	106.083	108.254
91	99892.9	4.276	126.788	210.349	38.0176		91	65684.8	2.812	76.32	176.225	97.2443		91	200410	8.578	289.302	190.527			91	289456	12.39	249.38	106.356	175.22		91	130398	5.582	161.708	86.953	203.751		91	227545	9.74	201.527	71.222	98.9144		91	399208	17.088	332.493	105.527	109.033
92	50453.7	2.16	149.633	95.143	72.019		92	62216.5	2.663	75.737	170.176	99.0146		92	210546	9.012	268.376	193.475			92	275265	11.782	230.893	130.205	165.55		92	119906	5.132	158.203	90.779	186.861		92	211985	9.074	187.71	76.709	104.483		92	367159	15.716	271.734	81.445	100.28
93	37321.5	1.597	100.138	48.163	81.0505		93	35054.8	1.5	128.719	80.056	112.879		93	127241	5.446	166.208	94.274			93	250134	10.707	225.811	139.22	148.424		93	116111	4.97	155.487	89.014	180.75		93	221957	9.501	175.88	78.966	100.914		93	370740	15.869	292.176	97.906	101.258
94	58513.7	2.505	136.041	118.667	66.4758		94	49710.5	2.128	96.155	99.963	105.398		94	181470	7.768	227.768	116.256			94	296687	12.699	253.649	126.206	180.148		94	127688	5.465	188.35	116.128	199.387		94	216161	9.252	169.598	78.59	102.988		94	376388	16.111	290.134	90.182	102.801
95	32174.6	1.377	86.875	39.691	84.5902		95	24516.4	1.049	90.232	30.493	118.258		95	120029	5.138	154.791	84.149			95	233550	9.997	269.513	126.013	137.123		95	127578	5.461	196.61	124.984	199.21		95	209615	8.972	170.711	81.499	105.331		95	366133	15.672	282.262	95.546	100
96	47994.7	2.054	108.977	131.685	73.7101		96	28660.7	1.227	94.531	81.652	116.143		96	83571.8	3.577	18.752	132.072			96	221647	9.487	254.336	113.034	129.011		96	118055	5.053	168.48	117.632	183.88		96	180161	7.712	140.866	57.891	115.871		96	349686	14.968	259.551	83.213	95.5078
97	91115.5	3.9	120.415	158.132	44.0542		97	40418	1.73	33.807	127.778	110.142		97	301284	12.896	341.723	187.083			97	222211	9.511	256.662	130.594	129.395		97	123988	5.307	184.111	124.821	193.432		97	187655	8.032	158.565	79.54	113.189		97	353888	15.148	266.091	86.466	96.6555
98	31638.5	1.354	62.832	95.462	84.9589		98	20119	0.861	87.461	51.139	120.503		98	274685	11.757	352.816	209.749			98	205126	8.78	228.875	131.085	117.752		98	117072	5.011	187.805	109.713	182.297		98	156849	6.714	148.497	57.755	124.214		98	350373	14.997	264.373	89.134	95.6955
99	25674.9	1.099	78.257	41.887	89.0603		99	19914.1	0.852	77.065	26.004	120.608		99	138062	5.91	250.736	215.264			99	209528	8.969	224.613	137.816	120.752		99	108358	4.638	166.437	86.974	168.27		99	153834	6.585	139.118	48.464	125.293		99	343935	14.722	265.374	106.737	93.9371
100	49401.7	2.115	127.343	131.369	72.7425		100	25576.9	1.095	122.739	63.814	117.717		100	227440	9.735	231.547	124.532			100	218201	9.34	255.601	142.648	126.662		100	122347	5.237	172.801	102.164	190.789		100	150601	6.446	133.107	51.101	126.45		100	342385	14.655	270.407	95.996	93.5138
101	22987.8	0.984	79.245	35.936	90.9084		101	19269.8	0.825	80.13	23.828	120.937		101	131365	5.623	273.135	167.669			101	203832	8.725	242.121	147.299	116.87		101	91278.2	3.907	163.342	119.067	140.773		101	138114	5.912	127.078	51.361	130.918		101	339305	14.523	253.766	83.564	92.6725
102	29326.1	1.255	72.129	101.639	86.5492		102	20889.2	0.894	98.218	45.252	120.11		102	246665	10.558	308.84	224.084			102	210652	9.017	250.789	150.603	121.518		102	108280	4.635	169.061	114.711	168.144		102	150458	6.44	128.789	55.654	126.501		102	339079	14.514	254.413	83.571	92.6108
103	16853.9	0.721	48.79	33.89	95.1268		103	26219.9	1.122	69.291	85.319	117.389		103	117655	5.036	285.13	131.204			103	209592	8.971	274.568	135.872	120.795		103	92397.8	3.955	166.718	122.969	142.576		103	151102	6.468	127.605	56.061	126.27		103	330161	14.132	258.471	85.836	90.1749
104	10118	0.433	54.528	31.401	99.7594		104	17594.2	0.753	30.274	94.428	121.792		104	102331	4.38	233.365	127.656			104	189931	8.13	237.15	157.161	107.397		104	83630.5	3.58	155.756	129.224	128.462		104	153016	6.55	137.752	62.869	125.585		104	317617	13.595	241.469	96.27	86.7491
105	19225.9	0.823	84.319	55.127	93.4956		105	15841.6	0.678	1.346	80.847	122.686		105	139957	5.991	256.927	158.009			105	195600	8.372	231.042	153.852	111.26		105	67240	2.878	176.112	125.763	102.075		105	150310	6.434	134.266	56.941	126.554		105	339234	14.52	287.425	100.249	92.6531
106	20131.7	0.862	65.189	64.621	92.8726		106	15459.7	0.662	64.39	74.63	122.881		106	151193	6.472	328.824	136.641			106	186025	7.963	225.879	149.397	104.735		106	67397.6	2.885	175.251	129.414	102.329		106	145661	6.235	127.716	58.758	128.218		106	324851	13.905	252.903	79.709	88.7246
107	24380.4	1.044	74.841	75.472	89.9506		107	25647.9	1.098	74.755	63.307	117.681		107	75282.3	3.222	24.165	198.313			107	184393	7.893	238.749	157.944	103.623		107	65951	2.823	166.667	123.576	100		107	132892	5.688	116.561	54.02	132.787		107	313321	13.411	238.795	83.338	85.5755
108	25195.8	1.078	62.425	113.055	89.3898		108	18151.9	0.777	104.229	70.541	121.507		108	268214	11.48	392.186	147.436			108	198885	8.513	243.313	156.901	113.499		108	67927	2.908	159.088	127.526	103.181		108	141088	6.039	128.248	67.988	129.854		108	317671	13.597	250.662	91.886	86.7638
109	9768.2	0.418	46.712	32.04	100		109	15986.6	0.684	53.346	32.805	122.613		109	99464.9	4.257	106.383	198.445			109	173200	7.414	217.662	127.3	95.9956		109	63119	2.702	154.917	133.528	95.4409		109	128977	5.521	114.383	56.282	134.188		109	299349	12.813	229.608	96.265	81.7596
110	8091.3	0.346	38.049	20.731	101.153		110	7152.5	0.306	26.985	41.376	127.122		110	83743.7	3.585	169.016	140.014			110	166282	7.117	207.891	110.751	91.2815		110	59415.8	2.543	141.523	133.328	89.4792		110	131420	5.625	109.398	56.264	133.314		110	297016	12.713	223.059	77.042	81.1223
111	18350.9	0.785	44.253	80.183	94.0974		111	8197.34	0.351	31.236	34.731	126.588		111	172372	7.378	244.352	164.885			111	179076	7.665	253.05	119.862	100		111	36087.4	1.545	75.838	119.035	51.9238		111	132246	5.661	110.938	60.027	133.018		111	295393	12.644	228.051	70.999	80.6792
112	8534.5	0.365	43.818	56.025	100.848		112	7071.81	0.303	42.072	26.802	127.163		112	87224.3	3.734	99.356	195.727			112	156804	6.712	199.797	111.115	84.8219		112	28125.4	1.204	74.218	37.156	39.1061		112	122010	5.222	104.008	59.03	136.682		112	309932	13.266	241	91.949	84.65
113	7937.51	0.34	37.189	21.779	101.259		113	6097.94	0.261	38.709	24.162	127.66		113	60587.8	2.593	163.501	95.934			113	154900	6.63	201.223	126.427	83.5246		113	27094.1	1.16	82.843	34.666	37.4458		113	117256	5.019	104.044	56.574	138.383		113	308155	13.19	232.851	90.281	84.1648
114	11174.7	0.478	54.611	40.567	99.0327		114	6455.8	0.276	46.365	26.587	127.477		114	106030	4.538	172.135	108.673			114	165893	7.101	213.38	120.41	91.0157		114	25904.3	1.109	88.528	43.662	35.5305		114	118511	5.073	103.419	55.213	137.934		114	305568	13.079	236.147	92.868	83.4581
115	10192	0.436	55.305	37.372	99.7086		115	6561.43	0.281	37.361	21.692	127.424		115	86766.7	3.714	160.286	100.528			115	137459	5.884	169.08	97.314	71.6392		115	38096	1.631	103.444	74.454	55.1574		115	85111.4	3.643	99.332	56.471	149.886		115	307235	13.151	240.704	96.741	83.9133
116	13629.4	0.583	55.503	37.737	97.3445		116	5037.47	0.216	42.81	14.123	128.201		116	105386	4.511	179.374	133.883			116	135146	5.785	212.747	80.438	70.0628		116	22980.6	0.984	61.151	37.216	30.8237		116	104230	4.461	93.466	53.313	143.044		116	299497	12.82	229.621	92.88	81.8
117	11510.6	0.493	60.529	29.296	98.8017		117	7377.27	0.316	22.871	35.632	127.007		117	87596.5	3.749	130.82	79.529			117	134912	5.775	219.425	75.804	69.9033		117	22202	0.95	62.501	34.985	29.5702		117	101297	4.336	85.647	45.235	144.094		117	295805	12.661	234.272	105.944	80.7914
118	9413.3	0.403	50.103	27.396	100.244		118	4266.83	0.183	48.307	30.973	128.595		118	70762.8	3.029	99.589	71.615			118	139944	5.99	255.435	99.854	73.3327		118	22565.3	0.966	59.106	34.553	30.1551		118	28359.9	1.214	81.427	38.371	170.196		118	294155	12.591	235.545	101.733	80.3408
119	9790.59	0.419	51.916	23.345	99.9846		119	4142.61	0.177	45.584	23.369	128.658		119	37478.3	1.604	5.784	138.027			119	142759	6.111	180.866	125.581	75.2506		119	21599	0.925	58.039	31.957	28.5996		119	28966.6	1.24	76.961	35.989	169.978		119	294011	12.585	231.32	98.002	80.3016
120	10778.8	0.461	53.743	25.42	99.305		120	4217.4	0.181	46.055	22.985	128.62		120	41683.8	1.784	96.323	76.807			120	140118	5.998	159.215	111.724	73.4513		120	24125.6	1.033	65.214	32.813	32.667		120	27498	1.177	70.733	46.664	170.504		120	285143	12.205	221.249	102.133	77.8796
121	7908.78	0.339	32.093	19.692	101.279		121	2846.8	0.122	29.656	15.602	129.32		121	31096.8	1.331	73.497	65.866			121	115804	4.957	201.237	75.265	56.882		121	24696	1.057	58.367	34.813	33.5852		121	23564.5	1.009	59.903	44.629	171.912		121	277508	11.878	211.013	104.418	75.7943
122	6504.39	0.278	23.434	20.162	102.245		122	1923.64	0.082	23.47	10.771	129.791		122	28182.9	1.206	91.22	69.842			122	111447	4.77	193.971	71.837	53.913		122	25010.3	1.071	56.622	31.091	34.0913		122	21363.7	0.914	63.559	38.761	172.699		122	270332	11.571	204.031	95.579	73.8343
123	6225.96	0.266	26.385	26.133	102.436		123	3106.22	0.133	31.678	12.795	129.187		123	30896.2	1.322	79.885	66.209			123	122278	5.234	224.32	96.015	61.2936		123	24379.1	1.044	53.217	26.907	33.0751		123	26339.9	1.127	72.751	57.658	170.918		123	266993	11.428	206.738	92.356	72.9222
124	5113.94	0.219	34.092	20.605	103.201		124	1610.57	0.069	21.351	11.607	129.951		124	25274	1.082	75.666	57.805			124	117764	5.041	220.049	118.845	58.2174		124	21515.8	0.921	48.005	28.288	28.4656		124	21580.5	0.924	72.645	63.207	172.622		124	260160	11.136	200.552	91.523	71.056
125	6383.13	0.273	39.879	25.324	102.328		125	1914.35	0.082	17.409	17.359	129.796		125	26506	1.135	80.057	51.845			125	118254	5.062	237.504	89.223	58.5511		125	16782.5	0.718	73.969	45.121	20.8457		125	23657	1.013	63.276	68.049	171.879		125	264826	11.336	209.044	96.271	72.3306
126	5576.15	0.239	39.182	36.471	102.883		126	1779.57	0.076	4.755	25.821	129.864		126	30521	1.306	82.154	60.458			126	117624	5.035	249.597	90.091	58.1224		126	17032.2	0.729	74.723	39.437	21.2477		126	20234.4	0.866	64.646	71.54	173.103		126	258139	11.049	205.958	94.244	70.504
127	7224.33	0.309	40.215	43.449	101.75		127	1823.51	0.078	28.624	7.764	129.842		127	21912.1	0.938	73.189	56.007			127	99324.3	4.251	254.939	79.799	45.6514		127	14869.5	0.636	63.756	34.321	17.7659		127	15764.3	0.675	58.004	30.607	174.703		127	254150	10.879	201.609	89.591	69.4146
128	5268.57	0.226	29.745	12.878	103.095		128	2227.84	0.095	28.716	13.49	129.636		128	39443.3	1.688	85.914	57.163			128	111499	4.773	256.066	79.688	53.9481		128	24991.3	1.07	68.087	56.873	34.0607		128	16850.6	0.721	75.673	30.856	174.314		128	257744	11.032	214.557	92.613	70.3961
129	7987.78	0.342	38.368	28.447	101.224		129	2425.57	0.104	16.338	15.083	129.535		129	25056.4	1.073	79.874	50.752			129	112265	4.805	233.133	97.942	54.4698		129	14037.1	0.601	61.81	30.342	16.426		129	16131.5	0.69	66.302	35.019	174.572		129	249771	10.691	207.444	90.532	68.2187
130	4800.02	0.205	32.732	12.858	103.417		130	2341.92	0.1	22.389	12.588	129.577		130	17837.5	0.764	34.216	85.756			130	106587	4.562	210.197	88.34	50.6007		130	14620.6	0.626	65.244	32.725	17.3653		130	14032.1	0.601	61.28	30.62	175.323		130	198643	8.503	208.22	96.459	54.2543
131	7572.47	0.324	30.686	29.25	101.51		131	2844.27	0.122	28.476	16.683	129.321		131	24780.5	1.061	107.134	64.443			131	98843.9	4.231	214.744	88.244	45.324		131	10693.5	0.458	49.433	27.734	11.0432		131	12343.8	0.528	49.15	35.732	175.927		131	210283	9.001	235.994	96.891	57.4335
132	3749.69	0.16	26.371	17.408	104.139		132	2721.74	0.117	25.499	13.212	129.383		132	18298.9	0.783	85.236	47.793			132	84425.2	3.614	207.786	81.729	35.4981		132	9488.08	0.406	42.312	20.927	9.10266		132	12701.6	0.544	50.633	28.818	175.799		132	204849	8.768	232.998	96.503	55.9493
133	2976.93	0.127	23.442	12.209	104.671		133	2875.11	0.123	29.779	11.246	129.305		133	19275.3	0.825	91.219	45.325			133	87764.7	3.757	187.017	73.74	37.7738		133	8769.41	0.375	39.189	24.673	7.9457		133	9378.23	0.401	42.855	25.252	176.988		133	200360	8.576	214.282	92.717	54.7232
134	4748.48	0.203	32.779	31.39	103.452		134	3507.17	0.15	34.398	12.804	128.983		134	21356.5	0.914	93.247	43.069			134	97355.4	4.167	206.596	66.905	44.3097		134	10126.9	0.433	46.122	23.249	10.1311		134	11013.3	0.471	58.377	21.884	176.403		134	207950	8.901	235.782	98.687	56.7962
135	3107.49	0.133	28.702	12.615	104.581		135	3351.69	0.143	30.659	13.281	129.062		135	18590	0.796	86.86	39.62			135	97289.9	4.164	198.439	79.78	44.265		135	8426.76	0.361	44.294	24.805	7.39408		135	9869.6	0.422	56.232	26.281	176.813		135	198414	8.493	224.102	90.676	54.1917
136	2958.34	0.127	25.263	10.089	104.683		136	2956.66	0.127	33.231	10.954	129.264		136	14545	0.623	80.658	37.8			136	91281.5	3.907	185.033	75.933	40.1705		136	7738.51	0.331	43.412	24.481	6.28609		136	9156.84	0.392	50.601	23.39	177.068		136	201824	8.639	227.69	92.371	55.1232
137	6701.69	0.287	30.37	22.697	102.109		137	4445.97	0.19	39.087	4.921	128.503		137	15827.7	0.677	75.727	34.999			137	102041	4.368	209.997	86.639	47.5027		137	6199.77	0.265	35.869	17.2	3.80893		137	9861.15	0.422	48.399	20.886	176.816		137	198000	8.475	229.749	90.87	54.0788
138	5614.18	0.24	26.14	18.375	102.857		138	2943.14	0.126	25.748	15.269	129.27		138	12673.3	0.542	64.366	29.909			138	96636.7	4.136	199.04	74.841	43.8199		138	5771.35	0.247	25.382	52.088	3.11924		138	10391	0.445	47.214	21.062	176.626		138	187669	8.033	212.697	86.389	51.2569
139	6927.31	0.297	29.65	27.887	101.954		139	3022.14	0.129	23.067	13.304	129.23		139	11148.5	0.477	46.285	55.939			139	88009.7	3.767	216.568	67.386	37.9408		139	3979.95	0.17	10.497	45.949	0.235337		139	10974	0.47	48.147	24.097	176.417		139	238449	10.206	205.349	85.237	65.1262
140	4068.68	0.174	40.377	21.537	103.92		140	4020.51	0.172	30.452	13.51	128.721		140	13090.3	0.56	52.863	23.128			140	83483.9	3.573	190.826	58.104	34.8566		140	4091.07	0.175	25.909	23.829	0.414222		140	11136.7	0.477	50.103	27.306	176.359		140	232798	9.965	187.339	87.982	63.5827
141	3296.77	0.141	33.205	14.998	104.451		141	2064.76	0.088	22.433	15.341	129.719		141	12355.2	0.529	87.885	37.923			141	78963.6	3.38	182.006	71.137	31.7762		141	4272.32	0.183	43.607	23.753	0.706012		141	12222.1	0.523	59.778	20.933	175.971		141	222401	9.52	178.343	80.93	60.7431
142	3903.9	0.167	38.56	13.687	104.033		142	2777.51	0.119	9.042	32.345	129.355		142	12641.6	0.541	45.935	55.147			142	49937	2.137	108.56	64.776	11.9954		142	4367.38	0.187	35.781	24.579	0.85905		142	12940.8	0.554	58.651	20.13	175.714		142	228374	9.775	183.302	81.448	62.3745
143	4268.52	0.183	38.742	24.65	103.782		143	3920.8	0.168	31.912	19.153	128.771		143	11079.2	0.474	66.227	46.35			143	53071.9	2.272	113.796	65.108	14.1318		143	4537.65	0.194	15.519	29.081	1.13316		143	13400	0.574	62.985	24.31	175.549		143	230021	9.846	187.851	80.929	62.8244
144	2402.76	0.103	5.315	39.037	105.066		144	3191.14	0.137	7.578	40.068	129.144		144	8494.36	0.364	41.313	17.249			144	43869.4	1.878	95.015	59.523	7.86054		144	3690.96	0.158	6.879	27.187	-0.229896		144	12738.8	0.545	60.306	27.893	175.786		144	222507	9.524	180.128	83.663	60.7721
145	2852.72	0.122	27.697	14.796	104.756		145	3429.86	0.147	1.281	30.533	129.022		145	13441.8	0.575	19.224	79.918			145	61494.9	2.632	175.339	83.83	19.8718		145	3556.18	0.152	12.215	25.141	-0.446868		145	10151	0.434	63.451	31.3	176.712		145	225985	9.673	178.967	87.286	61.7219
146	3581.95	0.153	2.185	39.314	104.255		146	4414.7	0.189	0.464	41.694	128.519		146	10222.4	0.438	34.48	36.902			146	65516.2	2.804	151.932	72.15	22.6122		146	5386.45	0.231	53.011	20.641	2.49961		146	11639	0.498	54.803	30.864	176.179		146	231674	9.916	187.682	79.126	63.2757
147	3931.78	0.168	5.184	34.828	104.014		147	4561.73	0.195	5.493	36.738	128.444		147	9714.97	0.416	64.915	26.39			147	31834.5	1.363	88.939	69.26	-0.340899		147	5838.95	0.25	49.065	23.55	3.22807		147	6643.81	0.284	46.002	29.329	177.967		147	190838	8.169	190.692	93.005	52.1226
148	5768.39	0.247	36.002	30.669	102.751		148	5018.88	0.215	17.006	35.623	128.211		148	10189.4	0.436	41.795	26.675			148	28607.9	1.225	80.282	69.537	-2.53975		148	5575.31	0.239	39.291	27.976	2.80364		148	7456.28	0.319	53.993	27.375	177.676		148	189826	8.125	190.408	98.699	51.8462
149	4441.74	0.19	44.534	13.518	103.663		149	4781.01	0.205	45.71	14.402	128.332		149	9264.16	0.397	64.314	30.417			149	49610.4	2.123	154.526	78.576	11.7728		149	5393.21	0.231	25.021	38.307	2.51049		149	8338.04	0.357	49.673	26.109	177.361		149	177358	7.592	183.967	91.049	48.4409
150	4464.56	0.191	38.938	18.144	103.648		150	4895.09	0.21	41.421	18.887	128.274		150	15345.2	0.657	56.145	27.743			150	29215.5	1.251	84.458	38.287	-2.12572		150	5252.1	0.225	31.059	22.54	2.28332		150	4965.22	0.213	36.433	23.889	178.568		150	172012	7.363	180.002	92.881	46.9808
151	9319.08	0.399	47.477	24.335	100.309		151	4644.12	0.199	26.938	25.705	128.402		151	8891.93	0.381	56.258	29.893			151	31284	1.339	64.492	45.403	-0.71606		151	4986.77	0.213	30.113	21.604	1.85617		151	7944.69	0.34	54.904	35.543	177.501		151	171051	7.322	188.768	93.345	46.7182
152	8786.31	0.376	29.764	66.683	100.675		152	4751.86	0.203	22.928	38.932	128.347		152	8057.92	0.345	37.617	15.276			152	57126.6	2.445	146.467	75.282	16.8949		152	5248.3	0.225	23.872	29.156	2.27719		152	6567.34	0.281	57.497	32.904	177.994		152	161484	6.912	169.505	76.528	44.1053
153	4649.61	0.199	25.358	37.893	103.52		153	2953.7	0.126	28.175	13.666	129.265		153	14739.8	0.631	63.927	50.905			153	28780.3	1.232	23.329	45.187	-2.42228		153	4793.26	0.205	13.787	28.877	1.54466		153	4156.98	0.178	32.762	20.113	178.857		153	154553	6.615	163.224	78.388	42.2121
154	9841.72	0.421	46.849	39.584	99.9494		154	4332.74	0.185	43.971	13.057	128.561		154	17755.1	0.76	36.447	90.795			154	31848.5	1.363	68.407	61.234	-0.331397		154	6544.1	0.28	51.149	22.295	4.36326		154	5139.71	0.22	35.552	21.718	178.505		154	198766	8.508	152.671	74.737	54.2879
155	7641.76	0.327	45.365	26.865	101.462		155	4173.88	0.179	11.964	41.45	128.642		155	13399.2	0.574	69.512	56.8			155	29227.7	1.251	27.633	74.654	-2.11737		155	7326.57	0.314	45.386	19.542	5.62293		155	5868.52	0.251	23.959	26.304	178.244		155	178272	7.631	140.124	89.079	48.6904
156	5541.93	0.237	24.656	38.966	102.907		156	3925.03	0.168	38.599	14.064	128.769		156	15962.5	0.683	70.439	72.642			156	24680.3	1.056	14.263	53.643	-5.21627		156	3535.06	0.151	26.709	22.064	-0.480876		156	4660.18	0.199	42.101	27.214	178.677		156	142691	6.108	159.314	87.317	38.9725
157	9786.37	0.419	50.317	43.335	99.9875		157	4257.95	0.182	40.775	11.415	128.599		157	16002.2	0.685	52.333	90.089			157	24389.7	1.044	65.873	52.851	-5.41436		157	4336.96	0.186	20.877	26.989	0.810078		157	3827.01	0.164	33.63	18.417	178.975		157	146678	6.278	167.413	91.153	40.0614
158	7131.38	0.305	25.936	51.963	101.813		158	4283.31	0.183	39.101	11.692	128.586		158	12912	0.553	65.111	60.493			158	22555.2	0.965	64.313	51.051	-6.66452		158	3817.29	0.163	40.807	20.708	-0.0265273		158	4084.73	0.175	37.478	18.859	178.883		158	185345	7.933	141.567	93.211	50.6222
159	2912.29	0.125	30.039	6.555	104.715		159	4309.5	0.184	36.88	12.86	128.573		159	11995.2	0.513	48.583	63.112			159	22948.9	0.982	63.415	49.117	-6.39617		159	3505.91	0.15	38.939	14.884	-0.527809		159	3090.59	0.132	13.809	25.008	179.239		159	178684	7.648	142.606	89.071	48.803
160	6035.41	0.258	29.811	29.057	102.567		160	5473.06	0.234	47.575	16.243	127.979		160	17026.3	0.729	39.097	35.319			160	24410.8	1.045	52.986	82.117	-5.39997		160	3323.81	0.142	33.973	16.549	-0.820959		160	4053.04	0.173	36.413	11.673	178.894		160	184760	7.908	146.541	81.983	50.4625
161	5097.04	0.218	25.207	22.76	103.213		161	4816.92	0.206	41.967	14.068	128.314		161	12774.3	0.547	38.977	72.433			161	23495.2	1.006	76.899	59.104	-6.02389		161	3372.82	0.144	30.235	14.787	-0.74206		161	5247.87	0.225	38.025	26.517	178.467		161	141466	6.055	159.613	82.197	38.6377
162	4085.15	0.175	16.432	32.944	103.908		162	5707.98	0.244	23.652	35.36	127.859		162	11904.8	0.51	40.142	72.637			162	20488.3	0.877	64.331	39.045	-8.07303		162	3732.79	0.16	33.613	14.95	-0.16256		162	5878.24	0.252	43.221	23.28	178.241		162	136690	5.851	157.79	85.359	37.3334
163	5359.41	0.229	46.617	21.845	103.032		163	6389.05	0.273	46.654	22.59	127.512		163	14372.2	0.615	35.64	80.7			163	21780.7	0.932	77.001	68.481	-7.19228		163	3052.56	0.131	29.88	10.542	-1.25763		163	5525.88	0.237	34.377	20.105	178.367		163	173606	7.431	144.173	83.008	47.416
164	4966.06	0.213	1.232	31.392	103.303		164	5856.27	0.251	27.268	36.95	127.783		164	8875.46	0.38	44.335	20.868			164	25301	1.083	106.77	56.283	-4.79332		164	3080.87	0.132	22.297	20.775	-1.21206		164	4170.92	0.179	35.788	18.103	178.852		164	136151	5.828	151.683	93.465	37.1862
165	4951.7	0.212	10.587	39.982	103.312		165	5893.45	0.252	7.883	41.428	127.764		165	12029	0.515	50.255	33.254			165	18884.1	0.808	138.956	48.1	-9.16627		165	2711.61	0.116	16.539	21.399	-1.80652		165	3181.43	0.136	32.097	15.285	179.206		165	151532	6.486	126.575	67.132	41.387
166	9306.41	0.398	39.395	30.992	100.318		166	8528.58	0.365	33.589	16.657	126.419		166	13374.2	0.572	51.39	33.821			166	22439	0.96	87.79	70.598	-6.7437		166	3562.52	0.152	37.231	15.007	-0.436666		166	4565.96	0.195	32.657	13.597	178.711		166	164786	7.053	131.666	62.184	45.0072
167	8679	0.371	34.502	32.821	100.749		167	7182.92	0.307	48.289	25.483	127.106		167	10489	0.449	52.953	25.035			167	16480	0.705	66.669	29.413	-10.8045		167	4331.89	0.185	30.067	20.137	0.801915		167	4081.35	0.175	28.386	23.411	178.884		167	85316.3	3.652	165.311	60.379	23.302
HU75
CTRL1	Area µm²	area fraction (%)	withd µm	SD	% closure		CTR2	Area µm²	area fraction (%)	withd µm	SD	% closure		siSAM2-1	Area µm²	area fraction (%)	withd µm	SD	% closure		siSAM2-2	Area µm²	area fraction (%)	withd µm	SD	% closure		siSAM4-1	Area µm²	area fraction (%)	withd µm	SD		siSAM4-2	Area µm²	area fraction (%)	withd µm	SD	% closure	adj % closure
1	631921	27.048	465.331	47.154	351.552		1	677134	28.984	481.841	25.334	274.486		1	765745	32.777	545.625	21.677	2400.74		1	633471	27.115	458.734	39.866	-604.762		1	677480	28.999	482.549	25.67		1	734564	31.442	533.803	46.089	453.518
2	635874	27.218	469.048	41.704	353.799		2	666869	28.544	477.936	23.476	270.294		2	761107	32.578	543.479	22.024	2383.88		2	617555	26.434	449.79	42.093	-585.447		2	671242	28.732	478.586	33.5		2	744058	31.848	540.974	57.843	460.89
3	627163	26.845	466.356	48.55	348.847		3	657711	28.152	470.473	24.926	266.554		3	733319	31.389	531.879	26.527	2282.86		3	597758	25.586	438.812	44.056	-561.421		3	657666	28.15	471.148	28.88		3	719036	30.777	525.668	52.715	441.458
4	626765	26.828	462.512	47.838	348.62		4	644985	27.608	461.92	22.679	261.356		4	727853	31.155	520.955	29.978	2262.98		4	575928	24.652	422.898	51.972	-534.928		4	636119	27.228	454.955	37.696		4	694906	29.744	498.772	44.048	422.718
5	627953	26.879	481.807	97.928	349.296		5	627978	26.88	451.275	22.844	254.411		5	712457	30.496	510.003	30.56	2207.01		5	549871	23.536	399.711	56.995	-503.306		5	620909	26.577	442.483	39.193		5	692979	29.662	500.705	43.119	421.222
6	598549	25.62	451.787	55.263	332.577		6	627081	26.841	447.416	21.753	254.045		6	671681	28.75	491.216	33.721	2058.77		6	542119	23.205	398.103	56.13	-493.898		6	608539	26.048	438.447	50.129		6	677591	29.003	486.167	40.95	409.271
7	591544	25.32	443.278	61.887	328.594		7	614369	26.297	441.295	29.565	248.853		7	666605	28.533	485.918	37.427	2040.32		7	536168	22.95	394.602	59.977	-486.676		7	595810	25.503	423.368	58.729		7	675349	28.907	487.248	40.777	407.529
8	587753	25.158	436.735	61.332	326.439		8	610379	26.126	438.205	26.857	247.224		8	644618	27.592	471.719	39.323	1960.38		8	511707	21.903	381.698	61.713	-456.991		8	576573	24.679	418.185	57.035		8	659348	28.222	479.925	39.592	395.103	359.426
9	577830	24.733	426.093	49.627	320.796		9	595635	25.495	429.112	29.97	241.202		9	648210	27.746	468.84	42.288	1973.44		9	531311	22.742	396.642	57.801	-480.782		9	554444	23.732	400.287	51.71		9	662882	28.374	499.023	66.869	397.848	361.838
10	555622	23.783	428.485	65.976	308.169		10	585592	25.065	422.504	33.336	237.1		10	631604	27.035	462.792	42.704	1913.07		10	521297	22.313	388.81	64	-468.628		10	550581	23.567	398.068	47.937		10	651789	27.899	479.724	58.189	389.232	354.264
11	545190	23.336	413.074	54.058	302.238		11	584333	25.012	420.736	34.725	236.586		11	618816	26.488	448.42	52.619	1866.58		11	501486	21.465	376.357	59.583	-444.586		11	543167	23.249	400.285	58.235		11	637359	27.281	470.691	57.393	378.026	344.413
12	541978	23.199	414.476	56.207	300.412		12	588454	25.188	428.972	43.258	238.269		12	598042	25.598	437.55	50.582	1791.06		12	478388	20.477	355.701	64.002	-416.555		12	510382	21.846	379.477	46.611		12	616444	26.386	450.684	59.19	361.783	330.134
13	540083	23.117	395.713	47.114	299.334		13	574101	24.574	417.288	43.738	232.407		13	591509	25.319	432.092	50.683	1767.3		13	475481	20.352	354.277	66.543	-413.027		13	514624	22.028	373.367	45.669		13	618273	26.464	456.308	57.924	363.203	331.382
14	511234	21.883	378.61	41.021	282.931		14	574147	24.576	425.307	56.154	232.426		14	582553	24.935	423.912	52.778	1734.75		14	456480	19.539	341.038	64.829	-389.968		14	507250	21.712	368.28	46.736		14	615679	26.353	457.105	58.791	361.189	329.611
15	513389	21.975	389.979	54.353	284.157		15	551283	23.597	394.882	35.146	223.088		15	571503	24.462	417.241	54.373	1694.57		15	433239	18.544	323.77	64.121	-361.762		15	490892	21.012	360.633	64.269		15	648785	27.77	524.001	129.177	386.9	352.214
16	510323	21.844	395.123	58.284	282.413		16	546767	23.404	403.394	42.017	221.244		16	552766	23.66	407.22	54.943	1626.46		16	435209	18.628	324.997	69.443	-364.154		16	479825	20.538	347.272	35.904		16	644694	27.595	534.576	161.212	383.723	349.421
17	535364	22.915	442.863	68.023	296.651		17	537090	22.989	394.138	44.714	217.292		17	537486	23.006	394.865	54.95	1570.9		17	432718	18.522	324.028	66.206	-361.131		17	470766	20.15	364.495	66.356		17	583733	24.986	440.639	82.12	336.379	307.801
18	503321	21.544	395.02	73.817	278.432		18	544496	23.306	405	44.528	220.316		18	531533	22.751	391.666	52.24	1549.26		18	417065	17.852	316.691	67.485	-342.134		18	453085	19.394	330.807	33.688		18	590111	25.259	465.004	120.273	341.332	312.155
19	501761	21.477	383.912	67.937	277.544		19	532943	22.812	386.995	45.834	215.598		19	516750	22.119	378.13	42.588	1495.52		19	402750	17.239	305.288	69.393	-324.762		19	441290	18.889	329.674	37.235		19	593598	25.408	467.608	109.534	344.04	314.536
20	485885	20.798	382.673	77.133	268.518		20	531449	22.748	405.11	68.909	214.988		20	509158	21.794	375.224	50.027	1467.92		20	395819	16.942	296.398	68.511	-316.35		20	442700	18.949	328.075	46.261		20	592323	25.354	463.616	122.498	343.051	313.666
21	508862	21.781	434.495	80.399	281.582		21	515704	22.074	373.098	40.437	208.558		21	496089	21.234	363.779	56.359	1420.4		21	371606	15.906	280.202	69.003	-286.965		21	432613	18.517	313.92	40.703		21	564258	24.152	449.631	124.016	321.254	294.505
22	475231	20.342	367.445	79.92	262.46		22	510135	21.836	368.715	41.171	206.283		22	481046	20.59	348.733	43.359	1365.71		22	370015	15.838	275.649	70.969	-285.035		22	422864	18.1	306.098	42.94		22	525979	22.514	422.144	110.05	291.526	268.371
23	473055	20.248	361.605	64.226	261.223		23	508723	21.775	381.109	49.909	205.707		23	472946	20.244	345.056	45.898	1336.27		23	351885	15.062	261.754	66.341	-263.032		23	408379	17.48	296.362	46.103		23	500541	21.425	392.916	83.061	271.771	251.004
24	458407	19.621	346.631	74.222	252.894		24	504054	21.575	373.832	52.97	203.8		24	466171	19.954	342.777	55.715	1311.64		24	342878	14.676	257.628	66.832	-252.101		24	404696	17.322	300.748	59.511		24	508403	21.761	393.289	86.435	277.876	256.371
25	457864	19.598	348.117	76.929	252.585		25	494560	21.169	368.336	50.179	199.923		25	458432	19.622	337.355	58.691	1283.5		25	330387	14.142	252.193	65.484	-236.943		25	381537	16.331	292.294	52.586		25	489574	20.955	368.55	62.917	263.253	243.516
26	450156	19.268	342.093	69.796	248.203		26	490545	20.997	362.678	49.25	198.283		26	460664	19.718	334.422	57.803	1291.62		26	328346	14.054	245.778	69.09	-234.465		26	397554	17.017	303.655	70.037		26	531482	22.749	481.828	199.144	295.8	272.128
27	445318	19.061	343.495	88.3	245.452		27	496567	21.255	370.91	60.868	200.742		27	449952	19.26	330.069	63.108	1252.67		27	328612	14.066	256.248	83.254	-234.788		27	395575	16.932	304.326	75.393		27	451674	19.333	341.819	61.23	233.819	217.641
28	430908	18.444	321.817	66.37	237.259		28	478146	20.466	349.963	52.981	193.219		28	440713	18.864	330.542	72.647	1219.08		28	325737	13.943	246.647	68.616	-231.3		28	368826	15.787	282.715	68.13		28	472441	20.222	387.728	115.876	249.948	231.819
29	449916	19.258	341.489	68.462	248.067		29	478013	20.461	351.305	55.407	193.165		29	439132	18.796	329.26	74.273	1213.34		29	300369	12.857	229.338	70.487	-200.513		29	358759	15.356	276.835	66.001		29	444341	19.019	332.961	64.109	228.124	212.634
30	453193	19.398	344.397	60.889	249.93		30	483288	20.686	368.42	63.946	195.319		30	420134	17.983	319.139	69.782	1144.27		30	303616	12.996	242.01	73.638	-204.453		30	354961	15.194	266.146	65.064		30	504090	21.577	449.007	170.233	274.527	253.427
31	448825	19.211	365.199	73.685	247.446		31	482475	20.652	367.809	62.576	194.987		31	415741	17.795	311.432	70.521	1128.3		31	309367	13.242	263.015	128.309	-211.433		31	338942	14.508	257.088	57.86		31	468588	20.057	380.173	115.996	246.955	229.188
32	462769	19.808	378.399	88.376	255.375		32	483897	20.713	372.942	56.369	195.568		32	405514	17.357	304.896	67.84	1091.12		32	316134	13.532	278.387	154.622	-219.645		32	331472	14.188	255.78	65.444		32	416920	17.846	319.423	63.544	206.829	193.913
33	449869	19.256	372.497	72.155	248.04		33	479145	20.509	369.76	55.647	193.627		33	395431	16.926	314.439	85.916	1054.46		33	286164	12.249	221.565	64.311	-183.274		33	319503	13.676	245.647	65.673		33	480172	20.553	445.235	228.136	255.951	237.097
34	428500	18.341	336.401	70.282	235.89		34	475091	20.336	372.221	56.394	191.971		34	386013	16.523	297.066	83.064	1020.22		34	295191	12.635	251.826	111.104	-194.229		34	305132	13.061	244.224	57.404		34	380359	16.281	299.92	67.717	178.435	168.952
35	427657	18.305	346.865	82.228	235.411		35	462168	19.782	357.755	59.716	186.693		35	384978	16.478	299.244	86.473	1016.46		35	298369	12.771	250.271	100.424	-198.085		35	295357	12.642	241.655	56.167		35	382095	16.355	302.506	75.562	179.783	170.137
36	425721	18.222	327.312	78.967	234.31		36	540004	23.114	442.486	174.085	218.482		36	374034	16.01	289.518	86.263	976.671		36	266337	11.4	243.586	119.552	-159.212		36	281835	12.064	236.026	59.691		36	372452	15.942	289.309	77.772	172.294	163.554
37	408184	17.472	313.785	59.053	224.338		37	550542	23.565	453.175	184.694	222.786		37	366663	15.694	288.71	90.107	949.874		37	289193	12.378	260.763	118.252	-186.95		37	263828	11.293	207.976	56.681		37	314645	13.468	252.767	71.218	127.4	124.088
38	385298	16.492	280.905	48.397	211.326		38	523377	22.402	432.581	191.798	211.691		38	349891	14.977	262.686	72.039	888.901		38	273104	11.69	225.528	95.419	-167.424		38	255355	10.93	205.637	66.067		38	387945	16.605	319.781	89.714	184.326	174.131
39	389254	16.661	302.304	71.075	213.575		39	457697	19.591	420.143	242.01	184.868		39	341494	14.617	256.93	72.121	858.374		39	248994	10.658	193.058	80.066	-138.164		39	256266	10.969	197.109	60.649		39	355463	15.215	303.436	108.873	159.1	151.955
40	386484	16.543	291.887	48.506	212		40	401212	17.173	298.467	53.664	161.799		40	335126	14.345	274.768	80.524	835.221		40	253496	10.851	219.617	99.342	-143.629		40	254053	10.874	195.461	61.828		40	351805	15.058	293.398	95.482	156.259	149.457
41	386148	16.529	289.58	47.429	211.809		41	392808	16.814	300.008	50.235	158.367		41	323665	13.854	253.929	76.036	793.556		41	236506	10.123	230.411	143.787	-123.01		41	220944	9.457	167.195	56.639		41	398600	17.061	388.866	184.759	192.601	181.406
42	365285	15.635	286.747	57.522	199.946		42	386127	16.528	288.848	48.855	155.638		42	317227	13.578	238.155	59.053	770.149		42	237690	10.174	202.527	87.523	-124.446		42	225310	9.644	186.646	76.787		42	324071	13.871	269.13	99.026	134.721	130.523
43	369812	15.829	278.118	54.143	202.52		43	396011	16.951	319.514	75.901	159.675		43	325655	13.939	257.301	89.31	800.791		43	227191	9.725	194.512	103.778	-111.705		43	242087	10.362	211.942	110.853		43	322054	13.785	262.654	94.836	133.154	129.146
44	338670	14.496	263.428	54.136	184.813		44	391388	16.753	322.252	80.178	157.787		44	307030	13.142	232.4	76.694	733.079		44	229442	9.821	205.433	108.835	-114.437		44	213368	9.133	185.5	82.889		44	328056	14.042	259.833	71.559	137.815	133.243
45	338551	14.491	263.74	58.822	184.746		45	380291	16.278	315.712	82.594	153.255		45	299917	12.837	225.207	76.627	707.218		45	278286	11.912	269.655	129.3	-173.713		45	108010	4.623	165.489	65.096		45	289169	12.377	226.017	70.513	107.615	106.694
46	333825	14.289	258.416	60.945	182.059		46	425482	18.212	370.731	144.811	171.711		46	291323	12.47	217.894	80.287	675.974		46	243400	10.418	239.89	121.374	-131.376		46	124915	5.347	246.478	143.098		46	276942	11.854	214.404	75.785	98.1192	98.3466
47	346526	14.833	277.861	71.912	189.28		47	403952	17.291	348.952	145.241	162.918		47	281093	12.032	207.554	73.545	638.784		47	190589	8.158	211.743	100.656	-67.2855		47	199660	8.546	166.128	62.566		47	279364	11.958	220.895	71.429	100	100
48	327764	14.029	255.74	63.788	178.612		48	399956	17.12	342.023	147.589	161.286		48	269251	11.525	205.094	76.187	595.731		48	178208	7.628	201.384	92.67	-52.2591		48	111526	4.774	190.823	87.18		48	293676	12.57	233.688	80.293	111.115	109.771
49	306236	13.108	241.848	63.622	166.372		49	488392	20.905	397.017	191.089	197.404		49	265484	11.364	206.257	80.702	582.038		49	202346	8.661	212.681	99.675	-81.5531		49	172038	7.364	168.818	89.779		49	301421	12.902	275.787	117.597	117.13	115.059
50	314882	13.478	245.033	67.811	171.288		50	412762	17.668	386.151	188.274	166.516		50	256434	10.976	199.984	80.97	549.135		50	169932	7.274	204.868	86.85	-42.2161		50	98989.2	4.237	187.396	83.739		50	261756	11.204	220.434	84.283	86.3252	87.9785
51	322750	13.815	270.924	75.239	175.762		51	381863	16.345	362.134	176.266	153.897		51	246742	10.561	190.78	70.433	513.901		51	172105	7.367	199.978	79.663	-44.8526		51	110812	4.743	223.116	120.38		51	163789	7.011	202.687	85.899	10.2426	21.0942
52	306936	13.138	243.204	80.34	166.77		52	340768	14.586	260.43	56.234	137.114		52	241831	10.351	192.651	94.73	496.048		52	147951	6.333	192.603	94.912	-15.5397		52	79153.7	3.388	141.417	61.164		52	236477	10.122	204.182	77.98	66.693	70.7198
53	299114	12.803	245.73	76.816	162.322		53	331527	14.191	250.302	46.169	133.339		53	238166	10.194	186.716	86.575	482.721		53	115674	4.951	184.179	83.492	23.6307		53	90994.7	3.895	161.261	76.336		53	276322	11.828	268.821	166.971	97.6379	97.9234
54	304704	13.042	259.794	94.734	165.501		54	327447	14.016	253.951	59.654	131.673		54	228228	9.769	172.872	76.31	446.592		54	113606	4.863	173.127	83.99	26.1406		54	92687.2	3.967	165.16	81.4		54	271040	11.601	252.959	140.173	93.5357	94.3172
55	299255	12.809	242.712	72.984	162.403		55	346409	14.828	294.452	119.719	139.417		55	221905	9.498	170.054	77.981	423.604		55	112183	4.802	167.485	88.48	27.8675		55	103285	4.421	173.327	91.576		55	235899	10.097	229.37	117.12	66.2448	70.3258
56	283151	12.12	219.526	71.131	153.246		56	304448	13.031	234.142	51.101	122.28		56	224324	9.602	170.87	81.79	432.399		56	78090.7	3.343	168.804	52.386	69.2417		56	64046.4	2.741	147.318	118.393		56	194837	8.34	181.905	82.341	34.3547	42.2911
57	282070	12.074	226.904	89.347	152.632		57	301317	12.897	242.521	55.708	121.001		57	201576	8.628	159.259	83.745	349.7		57	110790	4.742	168.363	74.513	29.5585		57	43076.4	1.844	38.52	160.387		57	267043	11.43	285.99	211.936	90.4316	91.5884
58	275723	11.802	213.65	80.596	149.023		58	276876	11.851	210.77	51.926	111.02		58	197700	8.462	157.555	84.004	335.609		58	91644.1	3.923	144.03	84.362	52.7934		58	71059	3.042	201.154	152.301		58	112382	4.81	268.562	106.399	-29.6809	-14.0026
59	271141	11.606	212.771	76.302	146.417		59	288111	12.332	216.56	42.092	115.608		59	188971	8.089	154.549	90.142	303.874		59	75241.3	3.221	126.067	62.853	72.6996		59	41871	1.792	40.948	181.332		59	106718	4.568	193.742	156.905	-34.08	-17.8699
60	279825	11.978	225.465	90.562	151.355		60	273809	11.72	213.722	43.898	109.767		60	183543	7.856	138.181	81.699	284.141		60	92310.3	3.951	176.157	81.221	51.9848		60	52784.2	2.259	144.872	165.456		60	100501	4.302	180.907	159.528	-38.908	-22.1142
61	260343	11.144	200.372	72.911	140.278		61	289054	12.373	263.136	129.028	115.993		61	172985	7.404	133.185	79.87	245.758		61	74972.2	3.209	151.355	84.482	73.0262		61	60762.7	2.601	189.537	126.519		61	147722	6.323	245.225	160.359	-2.23549	10.1247
62	254901	10.911	200.726	76.331	137.184		62	303586	12.995	299.676	154.554	121.928		62	138267	5.918	158.553	80.355	119.54		62	88254.3	3.778	136.47	81.518	56.9071		62	65043.5	2.784	196.204	127.906		62	180804	7.739	139.608	197.584	23.4568	32.7108
63	245345	10.502	184.8	70.99	131.75		63	290820	12.448	291.151	154.522	116.714		63	132893	5.688	154.033	76.968	100		63	68223.6	2.92	142.389	82.044	81.2162		63	66013.9	2.826	172.795	118.863		63	101657	4.351	179.287	156.347	-38.0106	-21.3253
64	226144	9.68	179.202	73.752	120.833		64	298809	12.79	292.741	148.197	119.977		64	131010	5.608	153.98	74.607	93.1556		64	64143.9	2.746	119.452	78.222	86.1673		64	39375.7	1.685	101.406	100.693		64	135683	5.808	219.533	136.526	-11.585	1.90551
65	236553	10.125	186.491	85.147	126.751		65	201565	8.628	205.556	64.227	80.2625		65	130888	5.602	174.777	114.438	92.7117		65	57985.2	2.482	119.1	79.706	93.6415		65	29601.2	1.267	66.185	114.977		65	167692	7.178	260.351	162.163	13.2735	23.7586
66	206885	8.855	171.269	76.386	109.882		66	203625	8.716	207.442	58.895	81.1037		66	116209	4.974	144.867	78.741	39.3463		66	64806	2.774	105.864	79.046	85.3638		66	52718.3	2.257	179.713	68.314		66	152386	6.523	347.745	138.264	1.38664	13.3089
67	107270	4.592	161.362	94.361	53.2426		67	248341	10.63	196.969	53.955	99.3661		67	116806	5	148.588	92.514	41.5166		67	74860.7	3.204	128.87	165.119	73.1616		67	28672.1	1.227	75.826	97.996		67	140113	5.997	287.992	204.883	-8.14464	4.92994
68	100908	4.319	154.96	92.17	49.6255		68	242044	10.36	200.465	54.099	96.7944		68	92561.3	3.962	118.869	66.563	-46.6254		68	47547.7	2.035	101.429	68.13	106.308		68	24150.9	1.034	73.221	90.778		68	182226	7.8	275.113	215.936	24.5606	33.6811
69	189504	8.111	156.358	86.595	100		69	249894	10.696	204.695	48.465	100		69	83081.2	3.556	119.361	53.191	-81.0903		69	52745.7	2.258	115.059	84.958	100		69	32713.3	1.4	114.164	76.467		69	100206	4.289	41.439	213.35	-39.1377	-22.3161
70	100705	4.311	188.007	86.841	49.5097		70	190851	8.169	203.302	59.941	75.887		70	79742.6	3.413	116.973	47.072	-93.2278		70	48589.6	2.08	102.853	77.419	105.044		70	48550.7	2.078	129.32	104.463		70	84845.6	3.632	78.033	213.181	-51.0666	-32.8028
71	120752	5.169	235.391	154.081	60.9085		71	178498	7.64	181.662	57.487	70.8418		71	81462.6	3.487	123.04	50.49	-86.9747		71	34010.8	1.456	82.228	59.083	122.737		71	27219.1	1.165	90.515	87.183		71	108002	4.623	55.169	235.653	-33.0832	-16.9936
72	132830	5.686	292.553	173.994	67.7759		72	219648	9.402	186.984	64.362	87.6475		72	80384.9	3.441	139.661	49.324	-90.893		72	35343	1.513	94.025	69.981	121.12		72	23395.9	1.001	84.378	60.533		72	44319	1.897	75.713	157.345	-82.5403	-60.4714
73	122466	5.242	271.754	162.293	61.8831		73	142770	6.111	188.014	72.591	56.2502		73	86323.5	3.695	135.446	50.9	-69.303		73	32489.8	1.391	87.217	67.051	124.582		73	36243.7	1.551	80.615	85.833		73	67346.9	2.883	140.019	82.153	-64.6564	-44.7496
74	106306	4.55	270.753	171.939	52.6946		74	138112	5.912	196.2	65.392	54.348		74	87636.2	3.751	149.285	62.098	-64.5306		74	24107.4	1.032	51.481	112.977	134.755		74	23864.9	1.022	70.225	87.033		74	43344.7	1.855	23.82	117.595	-83.297	-61.1366
75	108761	4.655	230.742	152.415	54.0904		75	133999	5.736	178.755	56.7	52.6684		75	53229.5	2.278	120.086	58.111	-189.617		75	50866.5	2.177	97.551	145.051	102.281		75	22551.8	0.965	67.073	98.134		75	38223.2	1.636	158.77	102.956	-87.2745	-64.6332
76	160754	6.881	196.224	119.986	83.653		76	129924	5.561	169.455	64.487	51.0042		76	42744.7	1.83	107.23	49.955	-227.734		76	34290.1	1.468	102.822	115.747	122.398		76	25652.5	1.098	89.157	93.804		76	52676.9	2.255	192.219	110.189	-76.0494	-54.7652
77	151538	6.486	179.598	244.561	78.4127		77	125746	5.382	157.888	63.124	49.2978		77	39904.3	1.708	95.191	51.292	-238.061		77	34540.6	1.478	55.246	168.563	122.094		77	21258.9	0.91	79.585	91.175		77	47319.2	2.025	40.735	231.403	-80.2103	-58.4231
78	59781.2	2.559	157.692	105.184	26.2413		78	182276	7.802	184.781	82.275	72.3849		78	38978.6	1.668	97.895	55.073	-241.426		78	68348.7	2.926	67.356	147.89	81.0645		78	16775.4	0.718	46.673	76.687		78	17665.6	0.756	69.287	44.918	-103.24	-78.6684
79	56168.8	2.404	138.561	104.181	24.1873		79	130790	5.598	176.463	67.124	51.3577		79	38800.7	1.661	102.707	50.598	-242.073		79	39191.9	1.678	42.011	180.707	116.449		79	18928.8	0.81	58.925	64.905		79	17292.5	0.74	28.903	116.5	-103.53	-78.9231
80	78269.8	3.35	167.139	89.589	36.7536		80	198750	8.507	184.559	68.676	79.1128		80	42516.2	1.82	104.113	50.572	-228.565		80	29635.4	1.269	48.378	140.076	128.046		80	16838.7	0.721	64.829	57.071		80	27761.6	1.188	84.408	92.097	-95.3991	-71.7755
81	141804	6.07	243.779	147.941	72.8781		81	240082	10.276	275.42	197.538	95.9929		81	38424.7	1.645	82.852	49.473	-243.44		81	44776.6	1.917	55.752	178.525	109.671		81	15689.1	0.672	13.365	63.948		81	54742.9	2.343	114.585	131.863	-74.4449	-53.3547
82	78250.4	3.349	170.586	108.641	36.7426		82	141243	6.046	146.131	66.339	55.6268		82	39037.7	1.671	85.058	51.153	-241.211		82	27706.3	1.186	18.835	174.058	130.388		82	19040.4	0.815	25.234	81.228		82	20331.1	0.87	25.589	133.685	-101.17	-76.8485
83	40737.9	1.744	43.442	85.615	15.4135		83	171461	7.339	174.529	98.977	67.9681		83	34273.2	1.467	111.32	48.094	-258.533		83	28138.9	1.204	19.152	163.48	129.863		83	12004.9	0.514	40.721	50.478		83	52950.2	2.266	132.179	119.822	-75.8371	-54.5786
84	60629.6	2.595	124.22	59.635	26.7236		84	107642	4.607	143.039	54.945	41.9039		84	31262.5	1.338	4.289	129.578	-269.478		84	25381.7	1.086	15.218	71.337	133.209		84	10392.2	0.445	48.22	44.388		84	30627	1.311	0.416	123.445	-93.1738	-69.8193
85	62816.5	2.689	145.281	59.825	27.9671		85	115961	4.964	165.113	101.747	45.3014		85	23608.9	1.011	72.829	25.826	-297.303		85	45923.6	1.966	116.653	82.794	108.279		85	11366.9	0.487	47.292	40.771		85	26190.8	1.121	30.005	175.845	-96.619	-72.848
86	71075.9	3.042	189.563	99.339	32.6633		86	85931.4	3.678	117.558	46.889	33.0374		86	24791	1.061	8.575	110.764	-293.005		86	33952.1	1.453	96.776	89.406	122.808		86	33548.2	1.436	91.272	108.048		86	17227.9	0.737	73.164	33.556	-103.58	-78.9672
87	145283	6.219	92.311	274.781	74.8563		87	116710	4.996	89.534	240.703	45.6073		87	14961.1	0.64	51.774	60.951	-328.742		87	51439.4	2.202	115.326	85.894	101.585		87	22782.5	0.975	101.207	44.292		87	60085	2.572	126.509	130.771	-70.2961	-49.7075
88	96399.3	4.126	208.243	178.939	47.0618		88	59583.9	2.55	118.069	52.651	22.2769		88	14154.2	0.606	48.478	51.528	-331.675		88	21183.3	0.907	53.912	48.002	138.304		88	21452.4	0.918	86.575	41.83		88	35264.8	1.509	73.105	125.121	-89.572	-66.6529
89	80021.9	3.425	188.117	130.478	37.7498		89	93474.3	4.001	34.807	245.152	36.1179		89	14714.4	0.63	54.844	61.182	-329.639		89	31758.9	1.359	107.444	65.27	125.469		89	29539.5	1.264	105.198	61.541		89	78320.9	3.352	138.541	115.833	-56.1337	-37.2573
90	79350.6	3.396	183.103	145.771	37.3681		90	59100.1	2.53	22.911	181.572	22.0794		90	11775.1	0.504	64.77	55.975	-340.325		90	25420.1	1.088	67.91	55.58	133.162		90	27081.8	1.159	108.374	66.794		90	67920.7	2.907	128.103	122.776	-64.2108	-44.3579
91	85032.4	3.64	200.34	146.697	40.5987		91	91618.7	3.922	0.385	204.08	35.3601		91	11493.7	0.492	59.155	18.038	-341.348		91	30583.9	1.309	90.993	81.087	126.895		91	17602.2	0.753	38.658	79.493		91	82305.5	3.523	63.06	168	-53.0392	-34.5369
92	66133.9	2.831	168.801	130.798	29.8533		92	75372.3	3.226	13.706	180.759	28.725		92	10638.5	0.455	50.923	22.363	-344.457		92	25450.6	1.089	73.019	53.148	133.125		92	32136.2	1.376	8.901	116.076		92	78611.6	3.365	92.572	168.469	-55.908	-37.0589
93	45501.6	1.948	72.728	98.652	18.122		93	154520	6.614	288.147	171.933	61.049		93	10088	0.432	48.596	22.72	-346.458		93	26776.8	1.146	67.017	55.846	131.516		93	30095.9	1.288	43.563	95.138		93	53537.9	2.292	128.28	142.475	-75.3807	-54.1774
94	77388.1	3.312	172.932	123.764	36.2523		94	45371.4	1.942	117.691	158.776	16.4725		94	9868.33	0.422	44.667	19.562	-347.257		94	39891.2	1.707	133.77	94.712	115.6		94	32609.8	1.396	28.092	128.395		94	66204.1	2.834	112.115	183.535	-65.5439	-45.5299
95	49526.3	2.12	126.509	108.759	20.4105		95	77007.8	3.296	105.987	209.267	29.3929		95	11626.4	0.498	51.462	25.507	-340.865		95	22585.6	0.967	54.553	30.056	136.602		95	33216.5	1.422	71.761	94.957		95	19825	0.849	66.783	59.073	-101.563	-77.1941
96	59085.8	2.529	133.969	65.517	25.8458		96	90189.8	3.86	51.347	261.646	34.7765		96	10208.9	0.437	50.145	28.441	-346.019		96	26244	1.123	68.237	44.875	132.162		96	29262.8	1.253	52.926	94.469		96	55211.5	2.363	20.031	182.838	-74.081	-53.0348
97	48660.6	2.083	80.4	60.931	19.9182		97	38683.7	1.656	102.61	43.212	13.7412		97	8144.11	0.349	49.821	32.682	-353.525		97	27018.9	1.157	84.184	79.761	131.222		97	34330.7	1.469	88.163	91.133		97	9612.72	0.411	37.018	25.229	-109.494	-84.1663
98	39324.2	1.683	100.756	54.517	14.6097		98	62399.9	2.671	30.055	146.107	23.427		98	7889.77	0.338	44.45	26.488	-354.45		98	30500.7	1.306	85.893	95.68	126.996		98	28686.5	1.228	20.193	115.93		98	34536.4	1.478	2.165	195.483	-90.1376	-67.1502
99	37212.1	1.593	90.22	66.962	13.4088		99	63948.3	2.737	54.728	111.33	24.0594		99	8538.3	0.365	47.319	34.055	-352.092		99	26514.8	1.135	77.027	82.122	131.834		99	21498.1	0.92	67.183	83.488		99	10143	0.434	46.357	26.532	-109.082	-83.8043
100	17735.7	0.759	48.784	63.5	2.33477		100	53469.1	2.289	26.253	118.863	19.7796		100	11414.7	0.489	46.889	50.559	-341.635		100	33163.3	1.42	77.327	119.762	123.765		100	9313.17	0.399	71.218	24.767		100	15463.9	0.662	58.289	68.754	-104.95	-80.1715
101	11968.6	0.512	38.855	61.437	-0.944335		101	32220.3	1.379	80.181	59.181	11.1015		101	10370.7	0.444	56.095	31.557	-345.43		101	29946.4	1.282	80.252	114.132	127.669		101	5900.64	0.253	40.308	22.273		101	15931.2	0.682	35.603	132.543	-104.587	-79.8525
102	13305.8	0.57	27.204	78.295	-0.184014		102	59953.2	2.566	187.302	130.687	22.4277		102	8538.73	0.365	47.575	33.214	-352.091		102	24843	1.063	61.135	119.091	133.862		102	6866.47	0.294	41.019	22.749		102	8989.53	0.385	5.407	63.438	-109.978	-84.5918
103	12494.6	0.535	27.367	86.661	-0.645251		103	31674.4	1.356	84.125	50.306	10.8786		103	18865.5	0.808	82.692	40.927	-314.547		103	25430.7	1.089	77.365	108.708	133.149		103	6938.3	0.297	36.725	25.771		103	8305.93	0.356	31.671	45.497	-110.509	-85.0585
104	12606.6	0.54	48.302	67.471	-0.581591		104	69313.7	2.967	231.785	146.606	26.2506		104	9502.87	0.407	63.838	25.783	-348.585		104	25531.7	1.093	74.821	108.683	133.027		104	6394.96	0.274	33.965	24.327		104	9478.79	0.406	42.817	17.106	-109.598	-84.2577
105	12581.6	0.539	49.806	37.508	-0.595764		105	113679	4.866	34.451	265.759	44.3696		105	6582.97	0.282	14.89	34.693	-359.201		105	21990.7	0.941	61.788	88.764	137.324		105	5781.91	0.247	35.049	25.727		105	26170.1	1.12	22.226	58.002	-96.6351	-72.8621
106	12886.7	0.552	34.828	50.664	-0.42232		106	107119	4.585	43.334	297.145	41.6904		106	10992.2	0.471	33.543	36.836	-343.171		106	21936.2	0.939	60.931	97.646	137.39		106	5658.97	0.242	43.836	43.143		106	22839.9	0.978	80.653	90.858	-99.2214	-75.1357
107	28183.7	1.206	63.305	123.67	8.27536		107	101881	4.361	36.664	298.719	39.5511		107	9327.11	0.399	46.196	41.242	-349.224		107	22090	0.946	58.179	113.034	137.204		107	10985	0.47	41.578	54.329		107	24937.2	1.067	84.015	92.376	-97.5926	-73.7038
108	22813.7	0.977	45.878	108.215	5.22207		108	38720	1.657	86.257	46.507	13.7561		108	10124.8	0.433	25.527	37.872	-346.324		108	16824.4	0.72	44.131	43.541	143.594		108	7308.83	0.313	29.54	54.353		108	10043.7	0.43	16.985	35.219	-109.159	-83.8721
109	17381.2	0.744	50.55	33.616	2.13322		109	30121.7	1.289	93.883	42.267	10.2445		109	12353.1	0.529	8.034	38.441	-338.223		109	12979.6	0.556	55.795	53.003	148.26		109	16609.7	0.711	34.069	61.475		109	25344.1	1.085	69.628	75.25	-97.2766	-73.4261
110	14858.9	0.636	46.579	34.792	0.699062		110	64863	2.776	151.26	71.849	24.433		110	6132.59	0.262	42.162	27.418	-360.838		110	19315.9	0.827	48.064	39.143	140.57		110	22362.5	0.957	41.869	67.154		110	18718	0.801	43.558	88.507	-102.423	-77.9499
111	17833.7	0.763	59.073	35.37	2.3905		111	64287.6	2.752	183.672	81.018	24.1979		111	9970.16	0.427	19.26	27.625	-346.887		111	22053.2	0.944	49.276	43.795	137.248		111	11625.5	0.498	56.085	48.032		111	10734	0.459	62.142	55.31	-108.623	-83.4007
112	19296.8	0.826	53.586	36.727	3.22241		112	27491.2	1.177	77.191	47.144	9.17019		112	8258.18	0.353	27.489	29.282	-353.11		112	19673.3	0.842	54.857	40.586	140.136		112	10411.2	0.446	39.557	46.67		112	14795.5	0.633	44.092	72.436	-105.469	-80.6278
113	16890.3	0.723	47.28	33.521	1.85408		113	36386.5	1.557	98.26	44.728	12.8031		113	6064.99	0.26	14.824	45.473	-361.084		113	20279.2	0.868	60.479	36.338	139.401		113	16996.3	0.728	24.569	86.279		113	18089.8	0.774	94.225	60.023	-102.91	-78.3788
114	19825	0.849	54.316	27.404	3.5227		114	34794.1	1.489	79.112	44.89	12.1527		114	4299.78	0.184	45.656	18.636	-367.501		114	16631.7	0.712	56.345	36.027	143.828		114	13026.5	0.558	46.815	23.937		114	15695.9	0.672	43.493	74.521	-104.77	-80.0132
115	22235.3	0.952	60.575	32.168	4.89319		115	78575.3	3.363	190.581	88.321	30.0331		115	5673.33	0.243	41.609	32.702	-362.508		115	37436	1.602	32.424	103.29	118.58		115	11727.3	0.502	35.408	23.035		115	31884	1.365	88.401	71.67	-92.1976	-68.9611
116	25005.7	1.07	118.201	74.484	6.46837		116	67683.2	2.897	190.433	88.368	25.5847		116	4096.14	0.175	23.611	20.066	-368.242		116	37234.5	1.594	78.149	113.591	118.824		116	12001.1	0.514	47.033	48.36		116	20165.1	0.863	58.219	74.73	-101.299	-76.9619
117	15769	0.675	65.513	38.824	1.21651		117	38843.4	1.663	96.778	75.657	13.8064		117	7768.51	0.333	20.775	54.756	-354.891		117	23892	1.023	49.271	45.8	135.017		117	9102.34	0.39	43.882	49.859		117	12106.3	0.518	47.142	78.503	-107.557	-82.4638
118	19571	0.838	58.53	50.005	3.37832		118	61852.3	2.647	216.399	82.112	23.2034		118	9124.73	0.391	13.108	68.449	-349.96		118	13618.9	0.583	46.11	34.789	147.484		118	11938.6	0.511	44.694	48.274		118	9784.68	0.419	54.397	27.779	-109.36	-84.0489
119	14009.7	0.6	42.02	25.454	0.216205		119	58366.7	2.498	195.176	80.143	21.7798		119	4066.99	0.174	28.961	30.109	-368.348		119	20703.3	0.886	75.299	62.24	138.886		119	9037.7	0.387	46.705	27.063		119	9782.99	0.419	54.252	25.946	-109.362	-84.05
120	13404.2	0.574	44.057	25.344	-0.128042		120	72422	3.1	164.152	129.945	27.5201		120	6927.31	0.297	9.67	62.335	-357.949		120	12774.7	0.547	43.483	30.117	148.508		120	16277.7	0.697	65.586	32.985		120	11363.6	0.486	58.186	28.518	-108.134	-82.9709
121	14033.3	0.601	77.515	31.344	0.229657		121	33154.8	1.419	91.945	52.706	11.4832		121	5120.28	0.219	33.114	34.632	-364.518		121	16291.2	0.697	51.196	35.109	144.241		121	16578.5	0.71	64.033	28.892		121	15115.4	0.647	70.375	48.729	-105.22	-80.4095
122	12974.1	0.555	54.461	40.598	-0.372593		122	36290.6	1.553	70.974	62.154	12.7639		122	11754	0.503	4.299	66.752	-340.402		122	13253.4	0.567	45.707	28.803	147.927		122	17738.2	0.759	70.287	39.977		122	17852.7	0.764	70.546	79.148	-103.095	-78.5406
123	14388.2	0.616	75.971	37.66	0.431449		123	45338.5	1.941	124.497	72.242	16.4591		123	5170.56	0.221	29.359	34.408	-364.336		123	15127.6	0.648	51.751	34.711	145.653		123	18135	0.776	83.48	42		123	22458.8	0.961	73.803	76.602	-99.5173	-75.3959
124	17727.3	0.759	62.266	38.695	2.32997		124	31315.3	1.34	36.518	99.834	10.7319		124	11069.5	0.474	80.731	36.948	-342.89		124	16219.4	0.694	55.272	36.772	144.328		124	17338.6	0.742	81.286	46.704		124	35119.5	1.503	76.117	73.117	-89.6848	-66.7521
125	12016.3	0.514	11.121	127.663	-0.917189		125	15520.5	0.664	54.329	28.012	4.28132		125	7956.1	0.341	33.189	52.315	-354.209		125	7433.04	0.318	51.085	25.893	154.991		125	9835.38	0.421	13.957	51.674		125	11995.6	0.513	45.147	27.065	-107.643	-82.5394
HU7
CTRL1	Area µm²	area fraction (%)	withd µm	SD
1	3101567	56.09	1455.24	93.765		siSAM2	Area µm²	area fraction (%)	withd µm	SD		siSAM4	Area µm²	area fraction (%)	withd µm	SD
2	3117825	56.384	1455.66	88.843		1	3540585	64.03	1564.48	360.179		1	3939836	71.25	1680.61	234.39
3	3042244	55.017	1427.89	91.879		2	3483361	62.995	1548.39	364.054		2	3836906	69.388	1693.98	230.38
4	2960854	53.546	1401.59	97.046		3	3427818	61.99	1531.59	361.678		3	3745330	67.732	1653.43	273.249
5	2935238	53.082	1382.28	88.636		4	3415345	61.765	1526.01	356.594		4	3740152	67.639	1663.4	257.597
6	2936939	53.113	1380.29	84.753		5	3397853	61.448	1517.72	353.797		5	3716147	67.205	1700.85	269.32
7	2928502	52.96	1373.55	100.032		6	3393185	61.364	1518.62	351.996		6	3692844	66.783	1749.92	231.848
8	2912022	52.662	1363.81	95.65		7	3344901	60.491	1501.68	358.387		7	3706638	67.033	1734.79	234.703
9	2920891	52.823	1362.44	94.849		8	3351041	60.602	1508.72	354.255		8	3642330	65.87	1636.19	266.572
10	2898639	52.42	1349.81	96.029		9	3302831	59.73	1476.56	362.947		9	3617589	65.422	1654.27	313.003
11	2870599	51.913	1341.66	92.58		10	3252470	58.819	1469.63	366.884		10	3613340	65.345	1631.26	321.156
12	2722710	49.239	1284.91	101.775		11	3215934	58.159	1452.11	370.178		11	3574337	64.64	1592.01	308.374
13	2711857	49.043	1276.3	106.314		12	2930161	52.99	1344.56	364.618		12	3266662	59.076	1484.04	225.995
14	2679918	48.465	1263.58	103.525		13	2864886	51.81	1314.94	372.28		13	3214593	58.134	1457.8	234.973
15	2658043	48.069	1254.17	108.185		14	2845275	51.455	1302.48	362.077		14	3198780	57.848	1439.01	217.865
16	2644058	47.816	1241.06	111.396		15	2820165	51.001	1287.89	361.674		15	3129921	56.603	1446.37	221.547
17	2584272	46.735	1222.57	100.398		16	2781281	50.298	1273.65	355.884		16	3131593	56.633	1418.76	214.616
18	2589662	46.833	1212.92	104.291		17	2691650	48.677	1245.24	359.062		17	3068412	55.491	1422.61	216.317
19	2568113	46.443	1213.74	90.022		18	2677035	48.413	1227.66	363.807		18	3035791	54.901	1396.92	202.528
20	2570953	46.494	1210.34	91.112		19	2636293	47.676	1218.03	351.855		19	3030587	54.807	1377.89	199.795
21	2526119	45.684	1194.32	89.318		20	2599200	47.005	1196.99	351.141		20	2942363	53.211	1377.23	211.086
22	2514773	45.478	1188.88	81.38		21	2538729	45.912	1165.83	358.094		21	2904850	52.533	1359.71	200.207
23	2484600	44.933	1169.84	98.22		22	2524071	45.647	1160.99	360.463		22	2881991	52.119	1349.65	204.433
24	2491868	45.064	1176.33	78.377		23	2408495	43.556	1123.84	359.758		23	2822894	51.051	1327.07	200.576
25	2447235	44.257	1155.7	91.954		24	2401991	43.439	1125.45	359.684		24	2812601	50.864	1312.89	203.412
26	2449256	44.294	1151.83	88.817		25	2404664	43.487	1117.16	369.91		25	2774610	50.177	1310.2	173.135
27	2430085	43.947	1144.01	97.779		26	2325604	42.057	1095.64	364.46		26	2741325	49.575	1304.67	178.799
28	2393321	43.282	1126.69	103.555		27	2208950	39.948	1062.75	346.739		27	2708196	48.976	1289.91	180.418
29	2380015	43.041	1116.15	95.003		28	2227673	40.286	1050.65	344.028		28	2723199	49.248	1288.82	183.03
30	2375113	42.953	1110.1	101.651		29	2177923	39.387	1019.79	354.959		29	2670919	48.302	1271.36	160.39
31	2350420	42.506	1113.49	111.346		30	2188886	39.585	1016.12	354.713		30	2621521	47.409	1223.17	150.143
32	2329487	42.128	1089.44	102.194		31	2146372	38.816	996.459	370.535		31	2590898	46.855	1214.02	158.3
33	2281816	41.265	1075.08	109.634		32	2115466	38.257	974.385	377.109		32	2603955	47.091	1223.22	168.353
34	2262987	40.925	1077.98	125.235		33	2020328	36.537	948.116	380.969		33	2574622	46.561	1199.16	168.671
35	2241865	40.543	1073.77	128.608		34	1994522	36.07	951.446	371.867		34	2540968	45.952	1195.58	163.4
36	2244383	40.589	1070.83	129.752		35	1975539	35.727	940.325	374.236		35	2514323	45.47	1185.61	165.904
37	2178632	39.399	1034.19	114.432		36	1921843	34.756	913.645	381.554		36	2452878	44.359	1181.16	168.84
38	2180767	39.438	1027.99	105.507		37	1863121	33.694	895.737	380.498		37	2432921	43.998	1185.13	190.719
39	2128153	38.487	1002.98	95.602		38	1861288	33.66	879.179	375.592		38	2416664	43.704	1178.11	188.923
40	2127916	38.482	1003.33	107.831		39	1781894	32.225	852.196	381.204		39	2340076	42.319	1154.83	185.985
41	2087991	37.76	993.235	115.019		40	1754229	31.724	836.318	391.61		40	2363367	42.74	1153.85	182.593
42	2086832	37.739	994.813	114.607		41	1690776	30.577	806.259	385.33		41	2347041	42.445	1121.93	183.078
43	2027351	36.664	964.852	115.622		42	1722059	31.143	826.184	382.485		42	2310933	41.792	1125.78	197.938
44	2019690	36.525	963.719	121.629		43	1647293	29.79	803.407	401.544		43	2252383	40.733	1098.02	210.288
45	1970215	35.63	925.688	102.935		44	1580317	28.579	772.517	388.287		44	2218486	40.12	1052.91	209.218
46	1933635	34.969	907.521	108.771		45	1568591	28.367	758.234	390.624		45	2202664	39.834	1071.2	196.077
47	1898335	34.33	901.76	119.63		46	1508596	27.282	732.284	379.017		46	2133443	38.582	1021.47	188.38
48	1905315	34.457	900.642	111.314		47	1455502	26.322	706.478	360.922		47	2116921	38.283	1029.38	171.713
49	1843207	33.333	879.287	109.894		48	1439555	26.034	702.05	365.648		48	2057804	37.214	980.178	177.094
50	1871957	33.853	922.214	131.837		49	1344488	24.314	639.467	321.056		49	2077777	37.576	996.49	178.518
51	1849747	33.452	887.961	116.812		50	1372505	24.821	660.164	372.441		50	2066689	37.375	1004.31	187.051
52	1806459	32.669	879.56	120.7		51	1329332	24.04	639.635	338.971		51	2009973	36.349	987.784	161.561
53	1771853	32.043	876.359	109.531		52	1314183	23.766	619.963	324.077		52	2047401	37.026	1006.23	144.888
54	1753338	31.708	861.44	111.991		53	1277510	23.103	617.085	338.282		53	1976245	35.739	968.514	172.701
55	1738087	31.432	837.545	115.982		54	1206834	21.825	608.66	373.127		54	1961730	35.477	957.124	164.033
56	1707463	30.879	822.029	127.778		55	1182305	21.381	603.148	393.113		55	1958231	35.414	970.036	173.361
57	1650682	29.852	791.853	118.745		56	1065098	19.262	635.736	334.91		56	1882818	34.05	925.741	163.282
58	1631395	29.503	813.219	121.102		57	1041666	18.838	597.019	308.772		57	1790107	32.373	876.515	170.539
59	1573265	28.452	762.304	110.226		58	1101632	19.922	544.462	341.997		58	1792141	32.41	889.319	153.582
60	1582563	28.62	780.828	129.553		59	1031556	18.655	520.105	325.899		59	1797662	32.51	900.443	171.523
61	1519302	27.476	750.738	122.034		60	986206	17.835	555.377	298.229		60	1780822	32.205	882.184	148.828
62	1520236	27.493	756.863	136.605		61	917026	16.584	555.432	291.334		61	1709661	30.918	835.072	126.977
63	1464559	26.486	716.706	130.259		62	910588	16.468	530.375	314.791		62	1721879	31.139	851.341	155.233
64	1429137	25.845	699.634	133.842		63	882554	15.961	555.556	303.26		63	1709581	30.917	863.353	146.879
65	1395004	25.228	694.449	145.241		64	858971	15.534	531.463	297.444		64	1645091	29.751	836.109	161.881
66	1379872	24.954	691.776	127.387		65	834849	15.098	540.403	306.937		65	1676405	30.317	863.557	157.896
67	1377259	24.907	683.097	127.41		66	822386	14.872	527.623	319.893		66	1595078	28.846	798.777	152.772
68	1309303	23.678	637.726	111.357		67	799398	14.457	527.338	359.913		67	1604454	29.016	785.133	128.416
69	1273178	23.025	624.518	116.738		68	779113	14.09	520.095	329.418		68	1575522	28.493	786.742	152.498
70	1219290	22.05	591.167	113.921		69	775950	14.033	534.798	313.493		69	1638021	29.623	888.072	216.615
71	1239071	22.408	614.31	114.614		70	745414	13.48	492.889	317.163		70	1575486	28.492	837.498	182.932
72	1172246	21.199	576.584	104.274		71	733029	13.256	524.573	349.515		71	1609976	29.116	892.872	221.57
73	1171052	21.178	580.635	116.276		72	721187	13.042	523.411	322.222		72	1485862	26.871	741.052	113.364
74	1101348	19.917	534.666	115.85		73	753779	13.632	555.825	268.539		73	1570857	28.408	868.448	193.128
75	1057839	19.13	539.773	113.58		74	676977	12.243	546.242	291.802		74	1484288	26.843	730.111	115.366
76	962126	17.4	491.336	97.2		75	716710	12.961	571.862	306.481		75	1414937	25.588	697.007	145.833
77	970539	17.552	514.427	95.394		76	647453	11.709	532.818	290.867		76	1362996	24.649	690.618	157.49
78	909742	16.452	467.336	89.966		77	650229	11.759	517.108	306.303		77	1289078	23.312	665.117	140.759
79	917438	16.591	477.355	97.726		78	601392	10.876	476.773	253.736		78	1308831	23.67	718.454	149.744
80	989879	17.901	524.365	94.953		79	517400	9.357	452.555	219.436		79	1324251	23.948	696.9	160.978
81	911502	16.484	494.9	106.781		80	439598	7.95	520.477	155.551		80	1317402	23.825	705.975	141.717
82	874022	15.806	465.157	114.553		81	546321	9.88	466.116	232.333		81	1316283	23.804	656.963	151.77
83	849092	15.355	459.096	110.156		82	450771	8.152	488.512	174.782		82	1234958	22.334	636.398	162.608
84	805736	14.571	456.539	107.226		83	440946	7.974	563.129	219.84		83	1180382	21.347	655.617	190.432
85	769263	13.912	420.895	132.771		84	419408	7.585	499.787	205.61		84	1151951	20.832	619.3	147.854
86	702356	12.702	367.121	124.349		85	394948	7.142	376.787	226.614		85	1118822	20.233	600.769	141.744
87	720875	13.037	391.231	158.17		86	369343	6.679	361.102	223.902		86	1123328	20.315	622.124	153.528
88	719912	13.019	419.694	143.987		87	353587	6.394	444.396	168.181		87	1025900	18.553	535.786	104.491
89	698828	12.638	402.875	146.874		88	330013	5.968	463.787	168.907		88	1026021	18.555	566.115	163.685
90	652729	11.804	369.429	165.009		89	366518	6.628	399.965	249.243		89	971767	17.574	517.246	132.68
91	612598	11.079	338.095	156.644		90	347668	6.287	492.689	238.572		90	966076	17.471	522.073	168.613
92	286846	5.187	295.318	94.996		91	369012	6.673	431	188.28		91	991500	17.931	540.693	169.628
93	573417	10.37	320.693	160.778		92	257330	4.654	314.089	162.298		92	865455	15.651	485.2	187.161
94	554565	10.029	325.265	139.468		93	280246	5.068	295.384	160.749		93	864179	15.628	468.922	165.603
95	283914	5.134	249.356	113.627		94	245229	4.435	259.65	142.885		94	839964	15.19	441.514	172.12
96	309165	5.591	250.491	94.132		95	253311	4.581	308.39	164.286		95	783309	14.166	443.723	184.274
97	216057	3.907	349.741	161.515		96	231891	4.194	343.999	195.16		96	779883	14.104	435.332	183.525
98	224065	4.052	351.177	140.484		97	208799	3.776	259.82	198.093		97	793828	14.356	485.273	176.299
99	181926	3.29	198.921	90.741		98	191244	3.459	294.137	235.344		98	872100	15.771	532.054	211.378
100	199795	3.613	316.881	237.263		99	223210	4.037	371.211	258.421		99	755609	13.665	466.931	202.271
101	172600	3.121	206.078	107.363		100	197723	3.576	355.019	202.735		100	889208	16.081	490.163	171.338
102	201370	3.642	252.395	172.443		101	145801	2.637	293.279	191.938		101	644199	11.65	398.534	158.475
103	149232	2.699	169.159	80.704		102	147098	2.66	384.106	145.145		102	727177	13.151	458.246	202.807
104	142800	2.582	169.089	74.377		103	121513	2.198	246.024	188.43		103	707409	12.793	452.078	201.835
105	125167	2.264	159.999	77.799		104	91518	1.655	153.579	113.901		104	721484	13.048	449.504	224.75
106	132800	2.402	261.452	127.898		105	88103	1.593	145.755	158.822		105	759897	13.742	484.921	245.276
107	117351	2.122	157.802	72.547		106	95371	1.725	208.643	139.854		106	732737	13.251	428.521	196.917
108	167530	3.03	211.004	118.912		107	105144	1.901	199.01	140.545		107	582039	10.526	315.128	135.376
109	86645	1.567	98.847	131.866		108	98703	1.785	224.019	103.356		108	545145	9.859	384.866	220.701
110	63115	1.141	44.858	151.287		109	95714	1.731	175.5	142.033		109	388494	7.026	226.786	87.006
111	76391	1.381	127.525	71.568		110	84332	1.525	177.699	107.738		110	389189	7.038	532.377	189.552
112	65394	1.183	97.668	64.859		111	100317	1.814	108.19	193.381		111	662927	11.989	414.546	182.462
113	78788	1.425	178.696	160.245		112	92256	1.668	183.021	102.96		112	473358	8.56	350.175	196.89
114	46325	0.838	35.075	125.176		113	97107	1.756	187.753	114.646		113	529066	9.568	411.018	217.632
115	58226	1.053	144.674	82.682		114	41546	0.751	118.12	58.232		114	296944	5.37	361.917	208.191
116	42827	0.775	85.704	97.533		115	70113	1.268	143.072	113.188		115	451960	8.173	534.842	179.068
117	57192	1.034	105.232	166.085		116	40029	0.724	59.73	137.633		116	270004	4.883	262.644	229.258
118	48511	0.877	93.484	119.755		117	36759	0.665	103.033	46.891		117	311136	5.627	404.509	180.531
119	46632	0.843	121.548	98.893		118	50769	0.918	135.259	75.7		118	231175	4.181	320.555	218.839
120	46982	0.85	42.333	192.06		119	43523	0.787	132.969	88.988		119	227033	4.106	285.854	178.835
121	34883	0.631	75.723	137.632		120	37272	0.674	78.178	86.076		120	153445	2.775	191.284	168.784
122	31165	0.564	94.792	110.248		121	23198	0.42	93.859	69.624		121	80855	1.462	117.806	145.28
123	34816	0.63	91.571	95.689		122	26248	0.475	69.031	43.282		122	91274	1.651	127.778	114.65
124	26669	0.482	98.101	110.531		123	21408	0.387	70.072	36.039		123	133173	2.408	193.147	197.594
125	34434	0.623	63.486	127.222		124	16993	0.307	64.022	52.045		124	144750	2.618	186.912	122.28
126	25535	0.462	74.754	77.393		125	22607	0.409	91.241	65.331		125	45850	0.829	156.073	96.683
127	12882	0.233	6.668	93.751		126	18461	0.334	99.857	61.71		126	102282	1.85	157.878	147.156
128	15319	0.277	32.961	72.051		127	16693	0.302	88.598	52.627		127	121243	2.193	159.673	221.887
129	13361	0.242	36.425	73.939		128	16338	0.295	49.087	29.373		128	85806	1.552	180.645	128.802
HU8
CTRL1	Area µm²	area fraction (%)	withd µm	SD		siSAM1	Area µm²	area fraction (%)	withd µm	SD		siSAM2	Area µm²	area fraction (%)	withd µm	SD
1	1747269	31.598	821.681	56.828		1	2017369	36.483	962.529	135.739		1	1718845	31.084	807.964	119.467
2	1740769	31.481	821.566	76.239		2	2119975	38.339	1058.11	193.214		2	1824158	32.989	897.456	243.727
3	1699440	30.734	793.072	56.749		3	2304673	41.679	1225.85	273.803		3	1975139	35.719	1076.32	490.695
4	1664809	30.107	786.33	65.916		4	2476400	44.784	1373.06	453.227		4	1742350	31.51	857.128	179.101
5	1616902	29.241	765.6	68.891		5	1796404	32.487	840.714	47.964		5	1578574	28.548	789.463	168.477
6	1596580	28.873	750.706	63.286		6	1773799	32.078	826.461	58.423		6	1510045	27.308	731.402	98.323
7	1519663	27.482	720.602	74.592		7	1734723	31.372	813.429	62.872		7	1470389	26.591	699.543	110.742
8	1505238	27.221	721.113	80.795		8	1707302	30.876	822.746	80.268		8	1436132	25.972	679.188	100.304
9	1432507	25.906	685.855	69.405		9	1654132	29.914	783.467	78.736		9	1406986	25.445	676.71	122.033
10	1421596	25.709	681.336	75.988		10	1608614	29.091	761.172	59.729		10	1375613	24.877	662.226	125.485
11	1394411	25.217	656.617	57.37		11	1591547	28.782	757.013	79.358		11	1323380	23.933	639.483	126.724
12	1373522	24.839	661.067	75.694		12	1556934	28.156	731.124	63.192		12	1290688	23.341	627.282	128.626
13	1307843	23.652	643.706	81.335		13	1490276	26.951	708.537	68.858		13	1279097	23.132	648.95	181.511
14	1283703	23.215	641.699	86.699		14	1467767	26.544	688.628	61.492		14	1184178	21.415	567.204	85.685
15	1247367	22.558	622.218	113.808		15	1440129	26.044	677.738	65.787		15	1164940	21.067	553.68	78.794
16	1227853	22.205	605.266	118.88		16	1407993	25.463	663.679	68.409		16	1159311	20.966	568.795	133.751
17	1209964	21.882	588.48	104.785		17	1376079	24.886	648.935	69.241		17	1141554	20.644	561.471	138.486
18	1169665	21.153	583.239	108.666		18	1344341	24.312	634.403	71.161		18	1125736	20.358	549.388	128.881
19	1155295	20.893	569.985	108.858		19	1316487	23.808	626.86	76.481		19	1094932	19.801	547.924	159.005
20	1132679	20.484	561.646	120.778		20	1281785	23.18	602.902	66.076		20	1029562	18.619	502.573	126.074
21	1081970	19.567	545.094	110.202		21	1250135	22.608	595.228	63.328		21	1025362	18.543	517.942	135.466
22	1048402	18.96	535.016	112.023		22	1212400	21.926	576.456	69.51		22	981651	17.753	487.565	113.998
23	1018682	18.422	521.51	116.444		23	1161430	21.004	555.767	75.411		23	948395	17.151	476.002	109.443
24	1012868	18.317	503.113	118.69		24	1126079	20.365	537.438	79.433		24	905356	16.373	443.73	112.182
25	1018922	18.427	505.889	116.329		25	1066022	19.278	518.731	78.939		25	864033	15.626	427.439	108.203
26	1046337	18.922	514.517	128.889		26	1046429	18.924	501.877	85.766		26	833940	15.081	419.206	122.588
27	959718	17.356	472.409	117.295		27	1039416	18.797	513.724	92.916		27	807072	14.595	395.858	112.155
28	939469	16.99	476.255	118.63		28	987113	17.851	488.432	84.92		28	803102	14.524	396.468	106.739
29	929630	16.812	473.078	129.006		29	945445	17.098	457.702	78.879		29	754923	13.652	366.111	104.141
30	897277	16.227	450.417	78.687		30	910722	16.47	435.301	91.834		30	719025	13.003	349.237	102.437
31	858759	15.53	427.803	80.938		31	883189	15.972	429.378	97.971		31	677869	12.259	314.16	76.272
32	833241	15.069	422.377	86.453		32	840914	15.208	410.252	93.343		32	648669	11.731	314.259	104.825
33	824412	14.909	416.917	109.99		33	817256	14.78	402.685	118.81		33	629404	11.382	297.021	82.15
34	758508	13.717	372.234	65.103		34	798439	14.439	391.032	95.425		34	598003	10.815	282.965	79.319
35	760184	13.748	378.981	76.737		35	764080	13.818	384.105	84.287		35	615401	11.129	328.262	151.147
36	726796	13.144	403.883	99.4		36	718058	12.986	355.063	75.918		36	604290	10.928	319.759	164.994
37	678481	12.27	334.667	74.152		37	669697	12.111	330.701	82.005		37	556250	10.059	273.768	123.618
38	632174	11.433	312.556	71.519		38	638993	11.556	323.548	93.58		38	520062	9.405	256.503	117.887
39	604079	10.924	304.759	81.983		39	644756	11.66	328.839	98.084		39	470932	8.517	227.597	99.417
40	559256	10.114	281.983	80.163		40	597343	10.803	289.955	88.309		40	452669	8.186	239.421	137.288
41	478412	8.652	223.911	54		41	545068	9.857	272.975	81.995		41	428260	7.745	216.884	125.991
42	510685	9.235	290.375	108.721		42	518354	9.374	269.934	111.172		42	385756	6.976	191.488	114.54
43	437095	7.905	208.281	58.774		43	478751	8.658	235.816	94.522		43	279818	5.06	217.466	143.357
44	444733	8.043	231.166	94.742		44	427920	7.739	218.937	106.172		44	255755	4.625	252.761	124.638
45	396098	7.163	197.271	70.639		45	201986	3.653	227.616	76.469		45	212042	3.835	175.612	102.712
46	406506	7.351	249.558	142.04		46	186272	3.369	208.901	79.753		46	240795	4.355	116.447	60.541
47	359770	6.506	216.053	137.544		47	171644	3.104	202.741	70.209		47	162027	2.93	155.436	60.062
48	302708	5.474	147.242	54.106		48	146808	2.655	188.068	70.252		48	150189	2.716	135.523	84.557
49	151094	2.732	160.245	105.098		49	139895	2.53	180.644	52.837		49	140235	2.536	151.8	96.779
50	190303	3.442	139.968	49.992		50	131669	2.381	167.214	56.904		50	115328	2.086	116.757	63.837
51	120431	2.178	128.137	49.84		51	116199	2.101	167.128	81.354		51	95825	1.733	149.225	109.561
52	153630	2.778	115.148	44.059		52	101020	1.827	129.242	45.481		52	71573	1.294	189.603	106.321
53	108574	1.964	119.604	40.662		53	80634	1.458	110.352	53.524		53	63745	1.153	174.062	91.589
54	99796	1.805	107.275	41.596		54	71595	1.295	91.228	48.328		54	58552	1.059	114.126	81.935
55	102561	1.855	114.464	39.282		55	45073	0.815	79.366	46.031		55	57406	1.038	181.226	92.528
56	88831	1.606	100.062	40.629		56	24141	0.437	64.544	46.301		56	49749	0.9	137.026	103.749
57	72968	1.32	82.672	38.055		57	26638	0.482	83.536	72.161		57	49431	0.894	138.317	63.068
58	62261	1.126	90.364	51.098		58	27439	0.496	24.506	66.017		58	39095	0.707	121.517	48.156
59	50160	0.907	81.55	46.893		59	23964	0.433	59.642	51.892		59	20445	0.37	60.178	65.094
60	27422	0.496	102.5	46.49		60	27523	0.498	94.022	52.502		60	24027	0.435	77.313	53.675
61	36711	0.664	74.265	32.665		61	18640	0.337	98.692	55.757		61	26474	0.479	85.773	59.512
62	33261	0.602	64.556	39.981		62	21010	0.38	70.58	38.892		62	30935	0.559	75.204	121.545
63	19906	0.36	26.065	80.694		63	16785	0.304	79.639	39.913		63	25106	0.454	122.858	66.608
64	21967	0.397	69.271	38.07		64	35421	0.641	111.554	80.067		64	19908	0.36	86.752	47.587
65	19354	0.35	77.438	39.139		65	23272	0.421	58.978	61.204		65	19314	0.349	89.097	40.682
66	23404	0.423	68.853	40.435		66	28855	0.522	86.828	87.737		66	17825	0.322	87.501	28.775
67	32167	0.582	83.008	32.485		67	26363	0.477	79.502	91.068		67	18035	0.326	57.696	59.969
68	30953	0.56	84.431	39.605		68	20891	0.378	62.546	61.55		68	15695	0.284	3.606	99.47
69	38095	0.689	84.788	61.482		69	20516	0.371	46.422	95.203		69	11502	0.208	38.488	35.084
70	35205	0.637	73.881	127.204		70	17027	0.308	61.502	24.483		70	12074	0.218	45.614	43.926
71	19352	0.35	57.673	55.047		71	16621	0.301	58.782	56.522		71	14571	0.264	59.531	37.202
72	19484	0.352	15.188	82.437		72	15144	0.274	58.986	43.568		72	15680	0.284	64.263	39.581
73	21560	0.39	74.765	75.004		73	16223	0.293	55.454	27.603		73	12567	0.227	54.545	39.298
74	13579	0.246	43.053	68.637		74	13593	0.246	49.776	44.767		74	17414	0.315	67.03	28.818
75	26080	0.472	73.14	47.207		75	14705	0.266	43.717	33.891		75	12791	0.231	61.372	58.628
76	26250	0.475	67.448	43.818		76	15180	0.275	54.724	29.146		76	13004	0.235	52.944	39.541
77	17667	0.319	61.203	58.511		77	18984	0.343	84.711	55.966		77	9843	0.178	38.421	20.319
78	18915	0.342	47.324	60.626		78	19505	0.353	73.445	39.73		78	12738	0.23	45.477	20.06
79	17171	0.311	7.989	64.221		79	18970	0.343	79.926	35.51		79	10321	0.187	40.681	25.167
80	16941	0.306	79.452	67.107		80	16693	0.302	65.871	29.479		80	8321	0.15	35.903	26.81
81	18022	0.326	45.884	67.681		81	14288	0.258	72.845	20.109		81	16931	0.306	20.759	118.529
82	12902	0.233	66.255	36.057		82	6269	0.113	47.04	16.933		82	9245	0.167	22.419	55.317
83	26096	0.472	73.469	66.027		83	9378	0.17	1.776	61.168		83	6988	0.126	26.42	48.202
HU9
CTRL1	Area µm²	area fraction (%)	withd µm	SD		siSAM1	Area µm²	area fraction (%)	withd µm	SD		siSAM2	Area µm²	area fraction (%)	withd µm	SD
1	3807825	68.863	1687.47	73.333		1	3660388	66.196	1692.17	57.188		1	3126139	56.535	1435.78	61.785
2	3765111	68.09	1676.57	74.391		2	3576706	64.683	1659.12	48.856		2	3023401	54.677	1393.34	58.574
3	3712743	67.143	1664.48	66.879		3	3499949	63.295	1627.22	51.536		3	2941116	53.189	1355.02	57.49
4	3566960	64.507	1632.64	59.928		4	3421569	61.877	1588.9	55.563		4	2875507	52.002	1322.19	57.082
5	3518754	63.635	1612.87	60.006		5	3329376	60.21	1549.13	60.268		5	2771874	50.128	1275.86	63.717
6	3448137	62.358	1587.09	60.332		6	3232538	58.459	1499.21	61.948		6	2668757	48.263	1233.12	62.578
7	3285672	59.42	1541.39	54.671		7	3127453	56.558	1452.52	68.175		7	2605205	47.114	1199.27	62.367
8	3210924	58.068	1512.6	56.611		8	3113589	56.308	1440.01	67.105		8	2542709	45.984	1170.18	54.84
9	3136002	56.713	1481.32	52.625		9	3000503	54.263	1397.88	65.839		9	2488573	45.005	1145.2	55.483
10	3062620	55.386	1453.87	56.801		10	2931879	53.022	1362.85	64.262		10	2430950	43.962	1122.7	47.92
11	3049449	55.148	1442.63	64.449		11	2850035	51.541	1322.05	57.287		11	2353423	42.56	1091.64	48.365
12	2984445	53.972	1414.37	68.568		12	2782521	50.32	1296.4	52.504		12	2303370	41.655	1064.98	45.765
13	2954898	53.438	1401.43	70.205		13	2686526	48.584	1283.08	58.548		13	2274442	41.132	1045.06	45.316
14	2889015	52.246	1373.78	69.531		14	2587523	46.794	1217.29	84.643		14	2177764	39.384	1002.37	59.742
15	2858253	51.69	1364.43	70.046		15	2563131	46.353	1201.21	85.469		15	2144309	38.779	986.733	51.667
16	2807698	50.776	1341.27	69.25		16	2503150	45.268	1175.36	82.727		16	2112545	38.204	979.83	56.754
17	2774467	50.175	1330.13	71.333		17	2464786	44.574	1158.04	81.554		17	2058149	37.221	952.095	53.624
18	2749674	49.726	1304.14	82.945		18	2410080	43.585	1133.01	84.78		18	2029017	36.694	934.819	60.041
19	2680784	48.481	1269.74	95.368		19	2348346	42.469	1105.62	82.988		19	1967682	35.585	910.656	61.388
20	2635885	47.669	1241.77	114.247		20	2327224	42.087	1110.61	101.481		20	1901655	34.39	892.444	69.99
21	2614627	47.284	1235.31	113.108		21	2239899	40.507	1069.14	107.121		21	1822872	32.966	848.757	72.324
22	2564110	46.371	1206.46	123.124		22	2174642	39.327	1021.27	85.902		22	1769892	32.008	828.554	80.18
23	2506733	45.333	1177.39	123.456		23	2106283	38.091	994.9	87.447		23	1703654	30.81	801.435	91.962
24	2461112	44.508	1154.46	122.421		24	2051911	37.108	970.943	72.31		24	1675727	30.305	785.414	84.402
25	2412734	43.633	1131.74	125.396		25	2003236	36.228	947.61	82.795		25	1555248	28.126	731.261	91.315
26	2391701	43.253	1121.77	120.817		26	1948110	35.231	920.589	73.664		26	1511341	27.332	711.853	98.819
27	2327670	42.095	1086.75	123.864		27	1918408	34.693	902.26	70.881		27	1479043	26.748	702.954	97.717
28	2277786	41.193	1066.81	123.46		28	1826461	33.031	870.771	71.154		28	1425928	25.787	680.215	104.078
29	2233508	40.392	1044.57	122.951		29	1814920	32.822	861.378	99.836		29	1339402	24.222	635.822	105.403
30	2170281	39.248	1020.55	120.437		30	1743888	31.537	823.3	76.323		30	1321596	23.9	628.952	104.708
31	2130553	38.53	996.251	120.224		31	1623333	29.357	783.961	75.195		31	1257767	22.746	590.442	98.828
32	2029870	36.709	961.682	115.091		32	1567211	28.342	741.996	72.389		32	1231318	22.268	579.296	104.931
33	1975991	35.735	942.179	120.754		33	1512062	27.345	730.434	84.863		33	1213990	21.954	574.388	102.03
34	1914756	34.627	917.321	128.771		34	1451696	26.253	702.467	81.812		34	1169825	21.156	550.687	102.282
35	1887179	34.129	891.605	121.865		35	1440050	26.043	697.769	92.138		35	1078822	19.51	518.05	83.478
36	1862038	33.674	872.663	120.42		36	1329575	24.045	646.261	89.197		36	984479	17.804	464.153	89.058
37	1818709	32.89	860.184	110.776		37	1286626	23.268	618.211	88.757		37	979347	17.711	471.147	90.896
38	1728060	31.251	810.319	97.264		38	1170903	21.175	586.371	100.988		38	916260	16.57	436.588	90.564
39	1669521	30.192	796.14	104.134		39	1141888	20.65	573.647	113.061		39	856105	15.482	414.982	103.683
40	1644881	29.747	790.195	100.966		40	1059062	19.153	559.792	123.727		40	822654	14.877	401.017	101.981
41	1620828	29.312	772.701	100.911		41	1030195	18.631	520.398	107.468		41	750100	13.565	361.509	92.317
42	1563746	28.28	746.304	88.178		42	1032618	18.674	547.102	125.555		42	654759	11.841	320.796	102.184
43	1562261	28.253	747.109	82.083		43	924929	16.727	468.632	121.14		43	613069	11.087	306.384	116.324
44	1471577	26.613	703.057	88.697		44	869531	15.725	463.776	112.625		44	609071	11.015	308.095	115.08
45	1426212	25.792	687.307	87.164		45	800657	14.479	438.696	119.149		45	362725	6.56	300.126	130.064
46	1382746	25.006	666.211	77.018		46	755843	13.669	414.649	124.826		46	269103	4.867	233.749	99.346
47	1335099	24.145	638.871	77.142		47	693680	12.545	374.947	140.971		47	189730	3.431	280.936	58.524
48	1318980	23.853	638.647	77.489		48	664243	12.012	358.242	137.761		48	226201	4.091	180.358	99.193
49	1316459	23.807	625.917	83.165		49	394679	7.138	294.085	99.207		49	187297	3.387	160.494	100.37
50	1291712	23.36	619.986	93.243		50	464910	8.408	243.984	103.425		50	120186	2.174	184.36	109.691
51	1244781	22.511	590.318	81.153		51	283139	5.12	311.033	126.971		51	110392	1.996	195.38	108.327
52	1211522	21.91	580.135	80.626		52	302723	5.475	257.99	118.018		52	128548	2.325	143.692	102.244
53	1155281	20.893	564.179	108.699		53	265939	4.809	219.332	86.558		53	51566	0.933	128.867	95.605
54	1099789	19.889	536.423	116.03		54	223412	4.04	203.461	96.889		54	49893	0.902	129.859	97.785
55	1059822	19.166	507.395	105.205		55	120039	2.171	174.102	94.616		55	46197	0.835	109.678	47.98
56	1024919	18.535	488.274	111.231		56	105182	1.902	172.072	79.678		56	59209	1.071	124.515	81.874
57	954538	17.262	454.941	131.588		57	98508	1.781	183.203	114.208		57	50005	0.904	152.014	104.117
58	946430	17.116	462.467	126.492		58	79967	1.446	152.584	74.532		58	36274	0.656	75.929	58.75
59	894911	16.184	428.092	119.643		59	45456	0.822	110.242	63.584		59	35666	0.645	59.266	68.024
60	853624	15.437	409.838	124.693		60	44224	0.8	106.959	79.378		60	35000	0.633	98.826	91.29
61	839184	15.176	410.978	132.362		61	36853	0.666	130.175	53.38		61	29045	0.525	83.129	103.73
62	812917	14.701	396.097	126.903		62	64583	1.168	128.896	69.83		62	11587	0.21	64.501	34.442
63	795457	14.385	386.152	134.547		63	33219	0.601	87.036	54.226		63	12908	0.233	65.233	34.125
64	771698	13.956	379.166	132.982		64	12844	0.232	56.289	44.846		64	12161	0.22	55.863	40.735
65	710408	12.847	352.052	129.639		65	13261	0.24	33.612	42.03		65	17234	0.312	46.403	71.157
66	692040	12.515	346.082	126.776		66	8573	0.155	5.029	41.388		66	7330	0.133	8.302	33.468
67	617125	11.16	325.157	124.591		67	12283	0.222	49.097	43.005		67	7667	0.139	26.725	44.329
68	630256	11.398	314.488	129.346		68	17220	0.311	52.844	58.208		68	13537	0.245	58.203	22.969
69	582542	10.535	297.688	123.043		69	11263	0.204	55.137	43.055		69	15415	0.279	45.575	24.587
70	461539	8.347	272.874	90.93		70	10918	0.197	50.368	35.495		70	8080	0.146	14.478	72.185
71	452815	8.189	268.567	90.942		71	18416	0.333	54.989	86.222		71	10750	0.194	24.495	71.141
72	492703	8.91	282.482	94.917		72	7021	0.127	51.77	20.776		72	9184	0.166	36.171	52.016
73	338517	6.122	252.165	109.686		73	9048	0.164	52.762	33.731		73	6937	0.125	29.519	31.573
74	397584	7.19	230.564	130.799		74	8924	0.161	28.044	47.428		74	9189	0.166	25.487	50.115
75	357804	6.471	229.802	95.013		75	10878	0.197	54.471	28.21		75	18066	0.327	46.998	36.322
HU9
CTRL1	Area µm²	area fraction (%)	withd µm	SD		siSAM1	Area µm²	area fraction (%)	withd µm	SD		siSAM2	Area µm²	area fraction (%)	withd µm	SD
	3441863	62.244	1609.39	75.919		1	3012570	54.481	1387.42	79.597		1	3271119	59.157	1526.56	55.944
1	3397364	61.44	1593.73	73.377		2	2969794	53.707	1370.37	78.009		2	3257683	58.914	1517.19	53.464
2	3363675	60.83	1571.06	74.222		3	2897779	52.405	1336.6	76.076		3	3196452	57.806	1486.73	55.467
3	3291340	59.522	1537.07	76.953		4	2739295	49.539	1273.83	72.212		4	3042373	55.02	1418.92	52.409
4	3194463	57.77	1508.27	79.205		5	2680155	48.469	1239.17	68.558		5	2970413	53.718	1383.59	69.559
5	3134955	56.694	1491.72	90.954		6	2620397	47.389	1212.22	66.052		6	2912742	52.675	1352.65	63.694
6	3103725	56.129	1469.34	91.123		7	2565839	46.402	1192.1	66.828		7	2809744	50.813	1304.56	60.85
7	3061613	55.368	1448.56	93.405		8	2511963	45.428	1165.34	66.534		8	2730589	49.381	1275.58	54.375
8	2996203	54.185	1419.54	89.959		9	2467022	44.615	1142.23	66.05		9	2667844	48.247	1245.04	59.454
9	2967410	53.664	1400.32	94.427		10	2391527	43.25	1108.37	60.396		10	2603994	47.092	1207.41	68.195
10	2933452	53.05	1380.04	99.211		11	2315542	41.875	1069.98	65.575		11	2499360	45.2	1160.19	65.276
11	2880019	52.084	1360.2	99.772		12	2239987	40.509	1031.5	78.158		12	2448643	44.282	1137.26	69.804
12	2865368	51.819	1336.04	97.762		13	2146805	38.824	995.126	73.579		13	2361754	42.711	1099.36	77.363
13	2753777	49.801	1293.44	108.117		14	2082832	37.667	964.128	73.009		14	2283587	41.298	1061.79	76.668
14	2679670	48.46	1263.06	107.832		15	2043552	36.957	945.904	70.615		15	2220533	40.157	1035.25	76.477
15	2684887	48.555	1257.3	107.547		16	1999475	36.159	926.17	73.529		16	2118290	38.308	994.937	75.888
16	2547941	46.078	1196.74	113.085		17	1955650	35.367	911.201	74.695		17	2055449	37.172	961.349	91.836
17	2566647	46.417	1202.96	123.229		18	1910930	34.558	882.555	77.132		18	1981696	35.838	920.859	84.699
18	2509839	45.389	1183.51	124.949		19	1815094	32.825	850.966	76.494		19	1949334	35.253	905.031	76.769
19	2319921	41.955	1121.66	122.263		20	1757515	31.784	823.682	81.584		20	1860015	33.637	861.732	90.631
20	2263012	40.925	1090.39	104.383		21	1686964	30.508	782.3	77.651		21	1767196	31.959	830.069	96.46
21	2244171	40.585	1071.55	120.776		22	1603691	29.002	751.831	75.973		22	1732677	31.335	809.019	98.116
22	2198613	39.761	1051.17	95.144		23	1494938	27.035	703.66	75.143		23	1631872	29.512	765.243	107.312
23	2100766	37.991	1007.89	103.85		24	1451871	26.256	682.072	92.589		24	1554731	28.117	728.03	107.03
24	2026255	36.644	956.875	99.339		25	1385280	25.052	653.039	86.666		25	1495650	27.048	696.9	105.72
25	1972504	35.672	937.967	92.409		26	1304566	23.592	619.845	75.198		26	1436683	25.982	670.382	107.198
26	1907616	34.498	914.633	101.275		27	1226726	22.185	590.816	77.958		27	1377220	24.906	652.644	110.562
27	1866852	33.761	883.262	98.99		28	1213239	21.941	563.598	86.374		28	1307299	23.642	618.11	104.519
28	1746813	31.59	845.915	109.967		29	1129498	20.426	539.059	98.638		29	1246745	22.547	588.705	101.431
29	1649352	29.828	814.194	115.266		30	1076360	19.465	522.212	107.72		30	1186631	21.46	556.03	88.673
30	1638731	29.636	785.439	109.154		31	915738	16.561	462.701	110.233		31	1081480	19.558	517.801	100.037
31	1618316	29.266	778.772	106.533		32	804158	14.543	407.43	84.816		32	999141	18.069	475.413	113.967
32	1454959	26.312	714.43	118.778		33	768376	13.896	385.985	101.966		33	927953	16.782	443.905	116.261
33	1414145	25.574	682.145	123.414		34	705917	12.766	362.432	106.706		34	898822	16.255	442.706	115.717
34	1347741	24.373	647.965	112.835		35	584392	10.568	293.244	99.739		35	796925	14.412	386.687	116.724
35	1301613	23.539	639.854	111.685		36	334555	6.05	324.236	117.009		36	783461	14.168	381.73	111.654
36	1288323	23.299	615.117	113.35		37	488630	8.837	271.441	115.146		37	687041	12.425	350.701	107.958
37	1271324	22.991	611.562	117.864		38	427498	7.731	241.825	120.376		38	590586	10.68	308	100.538
38	1199116	21.685	582.449	114.993		39	472909	8.552	245.199	129.338		39	559045	10.11	288.642	91.174
39	1120270	20.26	545.143	115.248		40	226866	4.103	198.231	128.34		40	402559	7.28	238.678	98.505
40	1045543	18.908	526.767	138.496		41	282088	5.101	211.948	103.698		41	340132	6.151	212.932	97.939
41	1042128	18.846	516.389	142.587		42	105277	1.904	221.352	108.433		42	278156	5.03	209.882	98.547
42	921382	16.663	473.001	160.643		43	72226	1.306	180.005	76.399		43	328840	5.947	200.22	102.782
43	929444	16.809	472.38	166.94		44	46063	0.833	101.488	48.219		44	151020	2.731	195.661	137.898
44	825796	14.934	421.558	157.765		45	88062	1.593	173.616	99.951		45	64790	1.172	155.735	142.917
45	751549	13.591	395.142	160.646		46	26812	0.485	81.702	50.076		46	40282	0.728	60.89	102.264
46	653320	11.815	341.229	124.308		47	31677	0.573	89.36	56.608		47	29703	0.537	78.078	54.104
47	660510	11.945	376.345	137.774		48	22543	0.408	89.191	63.527		48	57836	1.046	145.979	77.855
48	600997	10.869	327.007	132.668		49	18362	0.332	52.467	39.839		49	33339	0.603	73.264	71.131
49	495735	8.965	252.757	103.136		50	23756	0.43	47.282	41.447		50	28268	0.511	106.657	73.679
50	395364	7.15	288.263	106.762		51	30807	0.557	87.732	85.867		51	29085	0.526	97.478	53.164
51	339510	6.14	270.818	140.748		52	23225	0.42	4.639	113.021		52	49133	0.889	104.501	61.667
52	244813	4.427	232.62	118.89		53	23718	0.429	60.149	70.108		53	26742	0.484	97.537	40.814
53	207686	3.756	224.872	120.345		54	24514	0.443	81.15	65.57		54	33925	0.614	111.008	58.542
54	146847	2.656	198.834	103.831		55	24171	0.437	93.324	64.467		55	22325	0.404	50.721	63.372
55	96382	1.743	152.791	109.108		56	14457	0.261	57.371	28.2		56	25714	0.465	12.697	76.054
56	86208	1.559	159.027	121.274		57	12386	0.224	53.215	46.215		57	28489	0.515	18.124	85.027
57	38418	0.695	90.321	82.78		58	22504	0.407	64.816	30.348		58	37921	0.686	108.564	80.97
58	35710	0.646	76.385	82.205		59	10111	0.183	58.119	23.166		59	49261	0.891	139.759	82.913
59	14053	0.254	20.133	78.119		60	9355	0.169	50.535	20.21		60	37952	0.686	68.346	100.631
60	23425	0.424	68.254	62.771		61	7357	0.133	43.374	19.271		61	37975	0.687	75.035	79.757
61	22213	0.402	73.816	36.034		62	6751	0.122	32.146	16.574		62	15474	0.28	60.831	51.784
62	24101	0.436	85.999	32.17		63	7383	0.134	42.909	26.404		63	12571	0.227	78.614	23.875
63	21976	0.397	34.419	28.8		64	8303	0.15	44.758	28.931		64	13779	0.249	69.282	39.893
64	18593	0.336	49.865	54.659		65	8252	0.149	47.694	24.859		65	15547	0.281	44.001	29.645
65	17867	0.323	51.118	40.85		66	5211	0.094	36.842	26.533		66	24549	0.444	84.263	69.037
66	20336	0.368	104.406	41.784		67	5354	0.097	36.807	28.07		67	24593	0.445	61.47	34.25
67	12261	0.222	42.018	51.162		68	7346	0.133	7.563	46.987		68	26839	0.485	82.385	40.161
68	12307	0.223	44.706	39.933		69	5367	0.097	38.051	26.958		69	28175	0.51	100.159	36.3
69	13772	0.249	52.127	63.468		70	5254	0.095	38.133	26.412		70	37027	0.67	101.459	55.154
70	25725	0.465	79.823	44.323		71	5460	0.099	38.831	26.927		71	36573	0.661	109.381	41.321
71	17904	0.324	71.327	48.59		72	8714	0.158	51.955	31.779		72	45776	0.828	131.83	49.715
72	18536	0.335	60.129	70.395		73	8977	0.162	52.245	33.465		73	41027	0.742	112.13	52.882
73	19408	0.351	55.337	54.903		74	6227	0.113	31.523	11.855		74	42259	0.764	90.358	46.524
74
HU81	Area µm²	area fraction (%)	withd µm	SD		HU81 CTRL2	Area µm²	area fraction (%)	withd µm	SD		HU81 SISAM2	Area µm²	area fraction (%)	withd µm	SD
CTRL	2148350	38.852	1012.43	49.037		1	1346783	24.356	631.438	51.996		1	1537242	27.8	713.983	57.809		HU81 SISAM2	Area µm²	area fraction (%)	withd µm	SD		HU81 SISAM4	Area µm²	area fraction (%)	withd µm	SD		HU81 SISAM4-2	Area µm²	area fraction (%)	withd µm	SD
1	2122635	38.387	984.665	60.301		2	1332920	24.105	619.421	46.067		2	1487181	26.895	706.46	65.071		1	671941	28.761	475.883	35.77		1	694770	29.739	499.849	68.281		1	424032	18.15	312.245	38.629
2	2128899	38.5	1002.91	44.595		3	1313008	23.745	608.731	49.966		3	5529600	100	3.134e-13	0		2	665184	28.472	470.826	34.835		2	688866	29.486	497.369	70.547		2	414478	17.741	304.973	40.19
3	5529600	100	3.134e-13	0		4	1310234	23.695	607.257	48.204		4	5529600	100	3.134e-13	0		3	2336256	100	2.037e-13	0		3	674082	28.853	483.769	61.337		3	414288	17.733	305.825	41.19
4	2098785	37.955	988.884	47.56		5	1291167	23.35	599.403	48.111		5	1411040	25.518	671.212	76.94		4	662264	28.347	468.616	33.457		4	658704	28.195	473.707	63.581		4	405595	17.361	301.034	43.871
5	2079033	37.598	979.818	47.212		6	5529600	100	3.134e-13	0		6	1369562	24.768	654.552	81.055		5	655947	28.077	463.844	34.642		5	646000	27.651	465.949	57.136		5	2336256	100	2.037e-13	0
6	2044090	36.966	947.484	57.275		7	1259903	22.785	582.834	51.819		7	1310585	23.701	624.181	79.425		6	645108	27.613	455.9	34.257		6	626535	26.818	453.049	56.322		6	394067	16.867	292.331	41.799
7	2031700	36.742	940.773	57.173		8	1238243	22.393	572.392	51.993		8	1229791	22.24	587.403	91.782		7	2336256	100	2.037e-13	0		7	609287	26.08	442.692	47.287		7	380888	16.303	284.534	42.486
8	2001189	36.19	926.07	54.732		9	1219157	22.048	564.285	56.648		9	1200563	21.712	572.926	88.055		8	618528	26.475	439.14	35.481		8	596619	25.537	438.888	55.041		8	365243	15.634	278.326	45.071
9	5529600	100	3.134e-13	0		10	5529600	100	3.134e-13	0		10	1174204	21.235	556.641	74.836		9	605619	25.923	433.203	36.371		9	585539	25.063	429.228	55.714		9	2336256	100	2.037e-13	0
10	1950674	35.277	905.95	59.618		11	1200333	21.707	560.373	60.555		11	1143692	20.683	541.302	75.978		10	589312	25.225	421.305	36.285		10	577934	24.738	428.468	58.03		10	2336256	100	2.037e-13	0
11	1942698	35.133	901.548	61.215		12	1182637	21.387	548.759	59.884		12	1116864	20.198	527.459	74.688		11	2336256	100	2.037e-13	0		11	565217	24.193	415.091	52.246		11	340636	14.58	265.674	60.803
12	1905162	34.454	882.345	59.948		13	1166553	21.097	541.909	62.588		13	1098824	19.872	514.382	76.155		12	2336256	100	2.037e-13	0		12	2336256	100	2.037e-13	0		12	332618	14.237	263.104	60.856
13	1920089	34.724	890.016	59.405		14	5529600	100	3.134e-13	0		14	1060312	19.175	494.547	97.884		13	561410	24.03	409.923	45.88		13	536873	22.98	395.636	59.349		13	324892	13.907	258.103	49.456
14	1896332	34.294	883.524	63.01		15	1121085	20.274	530.759	71.391		15	1042165	18.847	490.111	79.042		14	544103	23.29	391.363	36.784		14	534167	22.864	398.559	54.755		14	312817	13.39	240.55	54.221
15	1855561	33.557	858.628	53.903		16	1116837	20.197	526.959	70.532		16	1031047	18.646	485.51	79.855		15	524069	22.432	377.565	35.895		15	2336256	100	2.037e-13	0		15	308752	13.216	244.57	57.689
16	1837142	33.224	854.408	57.579		17	1095326	19.808	513.185	66.604		17	5529600	100	3.134e-13	0		16	516478	22.107	373.466	35.784		16	515839	22.08	378.024	57.849		16	301985	12.926	245.737	85.699
17	1794443	32.452	833.364	55.226		18	1073894	19.421	503.605	68.472		18	928875	16.798	444.807	97.604		17	2336256	100	2.037e-13	0		17	499446	21.378	368.026	61.023		17	297046	12.715	244.098	86.835
18	1796457	32.488	838.167	58.671		19	1065779	19.274	502.078	70.114		19	971154	17.563	457.436	77.285		18	480217	20.555	350.344	36.586		18	495177	21.195	370.622	60.362		18	300185	12.849	267.755	97.406
19	1781067	32.21	829.752	59.484		20	1027250	18.577	488.368	71.163		20	961797	17.394	452.281	78.07		19	465947	19.944	341.38	39.328		19	487475	20.866	361.265	66.467		19	2336256	100	2.037e-13	0
20	1781070	32.21	831.175	65.542		21	1004061	18.158	471.887	70.106		21	888563	16.069	421.7	94.043		20	461496	19.754	347.744	45.049		20	2336256	100	2.037e-13	0		20	284623	12.183	256.817	108.48
21	1751915	31.682	814.238	64.099		22	5529600	100	3.134e-13	0		22	5529600	100	3.134e-13	0		21	451777	19.338	333.947	52.432		21	475492	20.353	361.456	72.631		21	244090	10.448	215.651	92.471
22	1731161	31.307	808.756	63.612		23	948379	17.151	443.964	65.867		23	878501	15.887	424.651	87.601		22	421753	18.053	308.546	46.05		22	468474	20.052	350.858	61.143		22	2336256	100	2.037e-13	0
23	1706103	30.854	793.675	64.318		24	5529600	100	3.134e-13	0		24	872396	15.777	425.359	99.077		23	411768	17.625	302.187	48.072		23	457838	19.597	357.891	78.679		23	2336256	100	2.037e-13	0
24	1691024	30.581	787.585	65.16		25	958033	17.326	454.323	77.198		25	838880	15.171	411.447	104.243		24	408522	17.486	299.499	48.613		24	448060	19.179	345.286	64.363		24	2336256	100	2.037e-13	0
25	1655263	29.935	771.005	63.224		26	936753	16.941	448.449	84.184		26	770495	13.934	378.249	106.282		25	399789	17.112	299.442	58.961		25	449923	19.258	348.395	67.973		25	197085	8.436	175.02	79.113
26	1644882	29.747	765.32	64.503		27	946563	17.118	463.857	100.948		27	767738	13.884	380.027	89.597		26	387310	16.578	285.923	55.913		26	2336256	100	2.037e-13	0		26	2336256	100	2.037e-13	0
27	1637524	29.614	760.259	62.257		28	5529600	100	3.134e-13	0		28	709019	12.822	351.118	111.773		27	392363	16.795	292.459	56.375		27	2336256	100	2.037e-13	0		27	168528	7.214	144.76	51.893
28	5529600	100	3.134e-13	0		29	875222	15.828	435.886	108.912		29	677436	12.251	332.831	104.14		28	370840	15.873	279.675	61.58		28	411125	17.598	309.505	71.784		28	134620	5.762	138.971	58.124
29	1590907	28.771	740.69	69.331		30	851479	15.399	422.588	104.461		30	685397	12.395	355.459	150.805		29	338641	14.495	245.636	43.977		29	398353	17.051	303.138	73.535		29	2336256	100	2.037e-13	0
30	1587547	28.71	738.203	76.132		31	849425	15.361	418.426	107.956		31	711253	12.863	371.826	148.397		30	345119	14.772	286.952	75.981		30	407095	17.425	321.681	87.715		30	158950	6.804	170.459	112.758
31	1562356	28.254	732.313	75.686		32	812729	14.698	399.973	95.827		32	732762	13.252	382.528	148.31		31	340162	14.56	283.942	87.554		31	386323	16.536	299.843	73.532		31	161348	6.906	185.719	120.564
32	5529600	100	3.134e-13	0		33	830450	15.018	408.296	106.415		33	5529600	100	3.134e-13	0		32	313794	13.431	260.108	71.307		32	382144	16.357	298.7	75.589		32	2336256	100	2.037e-13	0
33	1546464	27.967	723.211	70.771		34	804440	14.548	394.901	103.36		34	605890	10.957	326.886	142.005		33	313200	13.406	261.495	79.716		33	366855	15.703	281.741	78.036		33	136243	5.832	176.265	125.913
34	1519415	27.478	709.428	72.499		35	797428	14.421	409.018	134.789		35	5529600	100	3.134e-13	0		34	294763	12.617	238.064	77.244		34	365992	15.666	287.553	80.877		34	63662.3	2.725	103.416	54.461
35	1494116	27.02	697.636	74.576		36	5529600	100	3.134e-13	0		36	547942	9.909	287.144	135.748		35	301782	12.917	262.304	87.253		35	353450	15.129	275.617	64.254		35	64931.1	2.779	96.619	56.926
36	1481860	26.799	698.233	77.041		37	831245	15.033	421.962	153.518		37	5529600	100	3.134e-13	0		36	2336256	100	2.037e-13	0		36	347442	14.872	267.439	68.33		36	62147.6	2.66	112.143	50.079
37	1465590	26.504	697.099	82.492		38	827483	14.965	415.539	150.185		38	5529600	100	3.134e-13	0		37	264952	11.341	207.278	53.301		37	330466	14.145	250.485	67.319		37	2336256	100	2.037e-13	0
38	1455751	26.327	690.692	73.005		39	727201	13.151	355.646	89.178		39	514189	9.299	306.588	159.244		38	246347	10.545	185.054	51.529		38	332890	14.249	256.099	70.741		38	2336256	100	2.037e-13	0
39	1424211	25.756	673.733	72.553		40	717858	12.982	347.45	98.686		40	5529600	100	3.134e-13	0		39	236794	10.136	174.934	50.626		39	328096	14.044	256.836	77.913		39	36425.8	1.559	59.813	129.387
40	5529600	100	3.134e-13	0		41	683668	12.364	339.935	109.881		41	499919	9.041	297.997	152.307		40	225015	9.631	168.066	51.41		40	326423	13.972	254.649	78.56		40	2336256	100	2.037e-13	0
41	1378655	24.932	642.769	74.092		42	5529600	100	3.134e-13	0		42	466060	8.428	272.752	124.4		41	219024	9.375	163.368	53.868		41	312307	13.368	247.919	80.251		41	40431.1	1.731	39.492	73.542
42	5529600	100	3.134e-13	0		43	662594	11.983	338.241	90.281		43	425623	7.697	251.681	113.346		42	208732	8.934	151.875	42.859		42	307585	13.166	239.709	75.283		42	2336256	100	2.037e-13	0
43	1320465	23.88	619.071	74.45		44	645829	11.679	336.24	101.622		44	5529600	100	3.134e-13	0		43	207415	8.878	165.324	66.459		43	300855	12.878	246.992	85.347		43	44934.6	1.923	85.465	66.593
44	5529600	100	3.134e-13	0		45	631447	11.419	319.532	96.056		45	428071	7.741	246.275	106.313		44	219669	9.403	193.599	90.499		44	301999	12.927	246.6	70.405		44	22422.9	0.96	72.116	59.083
45	1272032	23.004	599.301	83.234		46	618840	11.191	325.063	96.224		46	396986	7.179	233.739	104.862		45	213162	9.124	186.02	84.43		45	288849	12.364	238.958	72.738		45	25001.4	1.07	73.362	73.691
46	5529600	100	3.134e-13	0		47	583916	10.56	296.822	93.876		47	344833	6.236	193.967	88		46	200922	8.6	177.434	82.532		46	274358	11.744	222.178	70.801		46	22783.7	0.975	89.572	79.221
47	1240176	22.428	591.118	106.362		48	583715	10.556	302.758	110.73		48	5529600	100	3.134e-13	0		47	178421	7.637	139.219	69.383		47	252636	10.814	201.506	55.408		47	33378.3	1.429	54.767	124.873
48	1230201	22.248	590.969	110.615		49	575917	10.415	302.483	122.918		49	5529600	100	3.134e-13	0		48	201764	8.636	180.986	81.547		48	249618	10.685	201.201	61.449		48	21894.4	0.937	70.595	89.497
49	5529600	100	3.134e-13	0		50	550753	9.96	281.192	104.601		50	5529600	100	3.134e-13	0		49	199534	8.541	178.228	84.83		49	240926	10.312	193.33	58.3		49	2336256	100	2.037e-13	0
50	1196576	21.639	567.638	106.444		51	5529600	100	3.134e-13	0		51	292876	5.297	184.983	116.821		50	183504	7.855	166.497	80.828		50	239104	10.235	202.842	81.237		50	14702.6	0.629	67.606	50.286
51	1200907	21.718	572.314	106.207		52	5529600	100	3.134e-13	0		52	304162	5.501	179.587	99.855		51	186230	7.971	177.731	92.957		51	218350	9.346	174.703	56.964		51	2336256	100	2.037e-13	0
52	5529600	100	3.134e-13	0		53	486116	8.791	237.758	72.274		53	5529600	100	3.134e-13	0		52	194246	8.314	183.191	106.265		52	215754	9.235	176.442	60.846		52	11976.6	0.513	69.842	53.148
53	5529600	100	3.134e-13	0		54	5529600	100	3.134e-13	0		54	280190	5.067	158.283	102.499		53	89679	3.839	190.464	107.125		53	207384	8.877	169.645	58.541		53	2336256	100	2.037e-13	32.909
54	1105330	19.989	529.651	109.996		55	5529600	100	3.134e-13	0		55	277389	5.016	164.259	114.886		54	81801.1	3.501	168.297	91.216		54	196913	8.429	162.894	65.559		54	13822.9	0.592	75.105	0
55	5529600	100	3.134e-13	0		56	456325	8.252	235.92	91.869		56	208469	3.77	119.416	56.641		55	89092.2	3.813	206.318	93.555		55	192504	8.24	165.13	74.721		55	10929.2	0.468	47.979	0
56	1075018	19.441	523.412	113.224		57	436080	7.886	229.703	93.738		57	120537	2.18	126.008	59.894		56	76138.3	3.259	183.323	178.472		56	187191	8.012	165.631	72.796		56	2336256	100	2.037e-13	39.282
57	1039488	18.799	491.073	116.752		58	401124	7.254	201.338	77.456		58	94106	1.702	126.112	48.58		57	2336256	100	2.037e-13	0		57	173928	7.445	161.725	72.992		57	2336256	100	2.037e-13	0
58	1022072	18.484	497.185	105.991		59	374889	6.78	207.251	94.787		59	81619	1.476	110.805	53.419		58	2336256	100	2.037e-13	0		58	166875	7.143	151.603	64.357		58	13447.8	0.576	70.909	34.576
59	1056252	19.102	516.082	127.527		60	365432	6.609	186.57	84.811		60	74886	1.354	99.263	48.099		59	47347.5	2.027	123.302	103.622		59	167282	7.16	148.467	76.399		59	2336256	100	2.037e-13	89.657
60	981374	17.748	473.751	133.642		61	389262	7.04	209.724	93.826		61	70854	1.281	103.502	58.621		60	28238.6	1.209	69.184	56.031		60	152574	6.531	143.823	69.028		60	12826.3	0.549	78.354	37.694
61	5322688	96.258	387.096	0		62	348254	6.298	188.604	94.519		62	54299	0.982	70.73	33.953		61	36894	1.579	86.298	61.296		61	149039	6.379	131.414	63.032		61	11275.7	0.483	23.085	37.456
62	962559	17.407	476.045	145.407		63	321817	5.82	177.038	91.062		63	5529600	100	3.134e-13	0		62	20753.6	0.888	83.849	48.141		62	154235	6.602	141.868	91.167		62	12454.9	0.533	78.546	44.77
63	970359	17.548	505.799	145.432		64	210305	3.803	171.286	89.582		64	39595	0.716	97.503	61.987		63	18687.2	0.8	75.372	39.004		63	143653	6.149	133.136	84.957		63	11253.3	0.482	55.008	43.197
64	949592	17.173	468.487	122.583		65	319862	5.785	171.318	93.439		65	40909	0.74	90.17	62.282		64	17435.3	0.746	74.771	40.728		64	136041	5.823	125.072	74.599		64	9761.86	0.418	52.081	71.653
65	899132	16.26	451.921	119.667		66	164654	2.978	219.992	127.02		66	31806	0.575	84.334	54.267		65	22297.9	0.954	97.951	86.872		65	122349	5.237	104.507	58.933		65	9669.76	0.414	57.275	0
66	900886	16.292	452.228	132.629		67	168284	3.043	230.94	125.604		67	27104	0.49	78.675	58.947		66	2336256	100	2.037e-13	0		66	115568	4.947	98.954	58.927		66	11361	0.486	34.508	47.911
67	915994	16.565	446.77	130.757		68	147531	2.668	199.904	119.068		68	26088	0.472	76.727	61.438		67	17982.4	0.77	66.022	50.178		67	2336256	100	2.037e-13	0		67	2336256	100	2.037e-13	60.527
68	965212	17.455	474.404	141.964		69	138468	2.504	210.213	110.669		69	23272	0.421	76.409	52.524		68	16513.4	0.707	62.507	51.825		68	102956	4.407	94.807	48.666		68	9612.3	0.411	51.082	108.325
69	946340	17.114	481.035	141.453		70	162285	2.935	156.931	207.849		70	24006	0.434	61.513	53.045		69	17003.5	0.728	63.272	53.289		69	96657.4	4.137	117.579	65.011		69	10661.8	0.456	41.816	85.665
70	810094	14.65	406.712	130.332		71	5529600	100	3.134e-13	0		71	23979	0.434	61.765	41.103		70	14009.3	0.6	57.542	71.124		70	88055.8	3.769	98.532	54.225		70	18988.4	0.813	52.264	97.831
71	812402	14.692	410.326	142.071		72	121983	2.206	169.083	93.194		72	29082	0.526	66.378	48.739		71	12039.1	0.515	72.753	51.673		71	87650.2	3.752	104.225	61.5		71	14965.8	0.641	1.285	0
72	800236	14.472	413.21	142.16		73	117695	2.128	168.66	90.803		73	33193	0.6	65.053	43.603		72	15188.9	0.65	49.506	31.467		72	84667.7	3.624	100.02	64.148		72	11560.4	0.495	30.343	0
73	777292	14.057	403.191	143.302		74	104396	1.888	168.574	92.335		74	5529600	100	3.134e-13	0		73	2336256	100	2.037e-13	0		73	57741.8	2.472	121.468	83.797		73	2336256	100	2.037e-13	0
74	788884	14.267	441.609	190.418		75	105152	1.902	161.101	93.036		75	33567	0.607	75.773	43.083		74	13116.9	0.561	56.158	29.373		74	71152.8	3.046	83.296	55.616		74	2336256	100	2.037e-13	27.87
75	713898	12.91	356.248	125.949		76	105719	1.912	168.298	84.819		76	36662	0.663	79.95	51.48		75	13828.4	0.592	55.782	31.513		75	44869.5	1.921	112.609	58.405		75	2336256	100	2.037e-13	0
76	787521	14.242	457.074	215.997		77	84599	1.53	136.865	93.265		77	34557	0.625	76.209	53.52		76	14114	0.604	55.327	34.657		76	37564.5	1.608	90.345	44.048		76	13109.3	0.561	40.949	22.809
77	730323	13.208	388.89	177.042		78	80230	1.451	135.61	87.45		78	31225	0.565	71.58	59.989		77	26145.1	1.119	48.769	127.493		77	43712.3	1.871	112.194	79.707		77	2336256	100	2.037e-13	0
78	708526	12.813	390.315	147.106		79	5529600	100	3.134e-13	0		79	32392	0.586	70.697	52.584		78	16077.4	0.688	50.514	50.347		78	47289.2	2.024	118.936	82.002		78	11942.8	0.511	40.089	52.65
79	649620	11.748	347.11	146.295		80	68714	1.243	137.34	84.667		80	24170	0.437	62.077	50.068		79	15352.8	0.657	30.25	46.753		79	2336256	100	2.037e-13	0		79	2336256	100	2.037e-13	0
80	674456	12.197	353.445	148.892		81	5529600	100	3.134e-13	0		81	16162	0.292	48.636	37.09		80	9856.5	0.422	44.424	26.599		80	39810.9	1.704	97.345	83.684		80	10694.7	0.458	54.631	0
81	605235	10.945	325.432	118.919		82	50804	0.919	124.772	74.598		82	10485	0.19	32.793	57.33		81	10249	0.439	40.381	68.217		81	42354.8	1.813	126.277	87.048		81	2336256	100	2.037e-13	65.241
82	5529600	100	3.134e-13	0		83	53251	0.963	119.786	66.511		83	14047	0.254	60.001	52.738		82	2336256	100	2.037e-13	0		82	31724.7	1.358	95.348	67.599		82	2336256	100	2.037e-13	29.856
83	589758	10.665	312.818	131.317		84	5529600	100	3.134e-13	0		84	18971	0.343	20.947	40.565		83	11119.8	0.476	50.416	26.21		83	32175.9	1.377	117.852	88.414		83	13264.8	0.568	96.036	30.667
84	577538	10.444	305.52	131.773		85	39844	0.721	118.993	65.554		85	5529600	100	3.134e-13	0		84	13563.5	0.581	62.213	30.153		84	32198.7	1.378	110.876	92.64		84	8281	0.354	27.255	34.328
85	566035	10.236	321.698	117.676		86	41650	0.753	117.621	86.782		86	18956	0.343	3.04	46.817		85	17132	0.733	87.701	57.424		85	27341.7	1.17	70.41	96.835		85	9502.87	0.407	28.717	39.259
86	508031	9.187	283.28	132.423		87	5529600	100	3.134e-13	0		87	19589	0.354	18.292	29.122		86	16092.2	0.689	86.906	54.897		86	28733	1.23	111.424	76.328		86	7066.73	0.302	27.894	32.89
87	510919	9.24	271.223	133.326		88	41497	0.75	83.495	80.459		88	19723	0.357	20.142	45.774		87	15414.1	0.66	84.075	61.098		87	27049.7	1.158	102.257	71.06		87	9071.92	0.388	32.723	0
88	547904	9.909	298.92	141.003		89	37438	0.677	76.149	93.45		89	24608	0.445	14.864	79.436		88	14468.9	0.619	69.294	59.915		88	16219.4	0.694	65.388	47.041		88	7442.76	0.319	33.103	0
89	5529600	100	3.134e-13	0		90	25640	0.464	69.277	38.624		90	26146	0.473	6.238	108.535		89	10924.2	0.468	39.799	33.988		89	9905.93	0.424	50.338	25.277		89	2336256	100	2.037e-13	21.813
90	5529600	100	3.134e-13	0		91	22352	0.404	61.214	33.03		91	27716	0.501	5.583	75.644		90	15198.2	0.651	82.792	63.641		90	12735	0.545	82.034	53.587		90	2336256	100	2.037e-13	17.106
91	495198	8.955	265.239	147.547		92	5529600	100	3.134e-13	0		92	23978	0.434	12.865	51.759		91	18888.7	0.809	68.185	49.151		91	10114.2	0.433	59.88	56.296		91	6231.45	0.267	43.995	0
92	380016	6.872	307.14	160.232		93	30074	0.544	53.809	24.211		93	27631	0.5	10.711	96.085		92	9632.16	0.412	10.175	72.656		92	8951.08	0.383	48.62	32.765		92	6095.41	0.261	47.95	0
93	368222	6.659	316.565	165.798		94	27727	0.501	50.595	24.292		94	5529600	100	3.134e-13	0		93	10480.5	0.449	25.486	75.171		93	9587.37	0.41	45.889	27.296		93	2336256	100	2.037e-13	41.857
94	5529600	100	3.134e-13	0		95	29169	0.528	56.215	24.804		95	27060	0.489	18.171	73.5		94	15548.4	0.666	47.943	77.513		94	2336256	100	2.037e-13	0		94	2336256	100	2.037e-13	35.665
95	339707	6.143	286.631	152.062		96	5529600	100	3.134e-13	0		96	24700	0.447	17.326	76.363		95	17096	0.732	58.865	71.8		95	9353.31	0.4	68.984	44.769		95	9404.85	0.403	58.267	36.702
96	362366	6.553	294.434	151.018		97	20223	0.366	47.292	27.043		97	5529600	100	3.134e-13	0		96	24913.6	1.066	88.355	67.191		96	7623.17	0.326	53.389	42.266		96	9181.77	0.393	48.563	0
97	350464	6.338	292.88	145.035		98	24517	0.443	109.777	73.661		98	5529600	100	3.134e-13	0		97	23665.1	1.013	88.318	68.226		97	8305.93	0.356	56.386	36.408		97	9989.17	0.428	44.809	0
98	369345	6.679	276.8	122.909		99	28538	0.516	45.583	27.666		99	23171	0.419	38.387	83.222		98	24380.8	1.044	86.53	61.236		98	8076.09	0.346	47.711	35.668		98	2336256	100	2.037e-13	43.423
99	328612	5.943	280.263	121.54		100	28638	0.518	45.999	25.264		100	21868	0.395	42.937	68.863		99	26186.5	1.121	75.482	82.965		99	5149.85	0.22	52.633	35.071		99	2336256	100	2.037e-13	0
100	5529600	100	3.134e-13	0		101	24288	0.439	54.329	30.247		101	22504	0.407	48.086	58.368		100	11220.8	0.48	50.814	24.559		100	6707.19	0.287	47.497	45.184		100	9649.48	0.413	64.375	24.677
101	313518	5.67	242.342	99.898		102	16283	0.294	61.365	33.815		102	17775	0.321	72.196	35.528		101	6212.44	0.266	41.371	24.385		101	6631.56	0.284	40.026	38.803		101	2336256	100	2.037e-13	27.646
102	292456	5.289	211.563	114.156		103	20381	0.369	57.792	29.771		103	17550	0.317	67.186	43.219		102	9085.44	0.389	57.645	66.38		102	2336256	100	2.037e-13	0		102	11207.7	0.48	53.179	50.627
103	171802	3.107	148.816	233.141		104	5529600	100	3.134e-13	0		104	14510	0.262	63.305	33.145		103	5761.21	0.247	36.656	21.149		103	2336256	100	2.037e-13	0		103	9962.13	0.426	39.82	32.474
104	280973	5.081	246.072	154.665		105	19605	0.355	79.307	37.405		105	11037	0.2	51.288	27.31		104	5421.52	0.232	33.802	25.32		104	6381.02	0.273	40.423	29.588		104	10380.4	0.444	52.791	0
105	5529600	100	3.134e-13	0		106	20653	0.373	71.739	45.041		106	7043	0.127	42.317	34.376		105	2336256	100	2.037e-13	0		105	2336256	100	2.037e-13	0		105	8401.83	0.36	53.392	25.704
106	198598	3.592	279.739	178.867		107	17573	0.318	71.947	42.239		107	5529600	100	3.134e-13	0		106	5362.79	0.23	36.051	25.198		106	4409.63	0.189	31.704	35.687		106	2336256	100	2.037e-13	34.427
107	261227	4.724	239.078	177.857		108	5529600	100	3.134e-13	0		108	9138	0.165	40.605	46.181		107	6332.85	0.271	34.362	31.606		107	4682.57	0.2	19.905	38.102		107	6042.17	0.259	48.393	0
108	5529600	100	3.134e-13	0		109	5529600	100	3.134e-13	0		109	9606	0.174	44.535	50.379		108	4843.12	0.207	32.383	29.501		108	3899.25	0.167	32.197	23.016		108	6054.85	0.259	42.076	0
109	5529600	100	3.134e-13	0		110	5529600	100	3.134e-13	0		110	10045	0.182	51.779	43.069		109	3944.88	0.169	28.481	24.871		109	2336256	100	2.037e-13	0		109	2336256	100	2.037e-13	19.323
110	231237	4.182	231.497	171.018		111	20809	0.376	16.729	78.96		111	7036	0.127	29.701	35.433		110	4224.15	0.181	34.08	27.645		110	6156.25	0.264	34.427	27.098		110	2336256	100	2.037e-13	35.976
111	271284	4.906	307.506	250.042		112	12088	0.219	54.771	23.085		112	5529600	100	3.134e-13	0		111	3489.85	0.149	25.134	25.84		111	3936.43	0.168	32.453	23.078		111	4585.39	0.196	27.388	36.77
112	5529600	100	3.134e-13	0		113	17849	0.323	26.328	69.778		113	6666	0.121	29.806	31.885		112	3733.21	0.16	25.856	28.7		112	3922.91	0.168	32.181	23.284		112	6948.01	0.297	52.319	34.942
113	149623	2.706	238.789	100.484		114	12502	0.226	8.588	73.185		114	7497	0.136	33.154	29.014		113	2780.47	0.119	26.993	19.069		113	3911.51	0.167	32.528	23.144		113	5465.88	0.234	43.318	0
114	160385	2.9	279.025	97.583		115	14398	0.26	81.348	33.196		115	6507	0.118	31.276	23.625		114	2758.5	0.118	26.979	18.932		114	3927.98	0.168	32.665	23.003		114	7170.25	0.307	35.06	0
115	5529600	100	3.134e-13	0		116	10720	0.194	24.008	62.425		116	6366	0.115	40.889	29.721		115	2762.73	0.118	26.848	19		115	3955.87	0.169	26.79	18.591		115	2336256	100	2.037e-13	40.668
116	124754	2.256	208.641	107.747		117	12931	0.234	60.856	50.093		117	6464	0.117	41.809	29.415		116	2336256	100	2.037e-13	0		116	5195.06	0.222	33.368	24.573		116	2336256	100	2.037e-13	0
117	148690	2.689	274.074	97.819		118	15855	0.287	67.445	50.236		118	6559	0.119	41.884	29.728		117	2336256	100	2.037e-13	0		117	3917.84	0.168	32.579	22.887		117	5175.2	0.222	34.739	31.833
118	167762	3.034	318.234	142.309		119	15546	0.281	70.391	51.843		119	6579	0.119	41.408	30.114		118	4439.21	0.19	24.017	28.071		118	3917	0.168	32.455	23.022		118	2336256	100	2.037e-13	30.263
119	153896	2.783	288.246	169.675		120	5529600	100	3.134e-13	0		120	6474	0.117	40.739	30.166		119	2717.52	0.116	26.256	19.089		119	4348.37	0.186	34.048	30.095		119	4684.26	0.201	46.994	28.25
120	131841	2.384	230.09	122.486		121	15527	0.281	63.305	68.248		121	6419	0.116	40.287	30.324		120	2681.18	0.115	26.532	18.824		120	3909.82	0.167	32.451	23.085		120	5077.18	0.217	54.298	27.287
121	124038	2.243	242.855	147.275		122	9842	0.178	27.848	76.242		122	5529600	100	3.134e-13	0		121	2731.46	0.117	23.091	8.192		121	5069.58	0.217	34.14	26.291		121	8041.44	0.344	43.053	22.832
122	113786	2.058	271.556	146.036		123	5529600	100	3.134e-13	0		123	6454	0.117	39.331	31.081		122	2691.75	0.115	26.593	18.792		122	3878.55	0.166	32.234	22.87		122	4852.41	0.208	31.511	41.758
123	114829	2.077	265.835	133.249		124	14688	0.266	51.819	38.007		124	6428	0.116	38.968	31.106		123	2697.24	0.115	26.665	18.766		123	3862.07	0.165	31.707	23.241		123	5164.22	0.221	56.71	31.231
124	98412	1.78	216.538	106.05		125	23219	0.42	37.96	93.932		125	6480	0.117	39.926	30.395		124	2723.86	0.117	26.653	19.117		124	3863.34	0.165	31.77	23.172		124	5677.98	0.243	35.258	22.712
125	133402	2.413	183.851	131.396		126	5529600	100	3.134e-13	0		126	6465	0.117	39.496	30.553		125	2738.64	0.117	26.747	19.213		125	2336256	100	2.037e-13	0		125	5909.51	0.253	1.601	34.713
126	154396	2.792	178.439	157.575		127	22231	0.402	62.063	47.707		127	6515	0.118	39.558	30.622		126	2714.14	0.116	26.669	18.973		126	3875.17	0.166	31.174	23.662		126	5793.32	0.248	0.914	35.364
127	135888	2.457	180.041	140.623		128	5529600	100	3.134e-13	0		128	5529600	100	3.134e-13	0		127	2758.93	0.118	26.891	19.125		127	3919.11	0.168	32.086	23.413		127	5863.45	0.251	4.456	45.214
128	5529600	100	3.134e-13	0		129	17406	0.315	73.962	52.721		129	6606	0.119	40.733	30.423		128	2703.16	0.116	26.909	18.656		128	3919.11	0.168	32.366	23.173		128	6878.3	0.294	2.699	68.736
129	69328	1.254	137.526	81.497		130	5529600	100	3.134e-13	0		130	5529600	100	3.134e-13	0		129	2336256	100	2.037e-13	0		129	2336256	100	2.037e-13	0		129	7441.07	0.319	15.213	45.143
130	107205	1.939	162.776	125.151		131	11892	0.215	54.049	47.129		131	6662	0.12	42.609	29.789		130	2336256	100	2.037e-13	0		130	3891.65	0.167	32.463	22.866		130	7365.86	0.315	1.041	0
131	5529600	100	3.134e-13	0		132	12483	0.226	46.185	37.661		132	6726	0.122	42.51	30.276		131	3340.28	0.143	24.696	16.953		131	3888.27	0.166	32.434	22.863		131	5140.56	0.22	21.773	26.649
132	65991	1.193	172.509	85.261		133	9673	0.175	42.574	37.531		133	6723	0.122	42.05	30.391		132	3360.99	0.144	14.383	21.456		132	3886.58	0.166	32.47	22.819		132	2336256	100	2.037e-13	19.68
133	5529600	100	3.134e-13	0		134	5529600	100	3.134e-13	0		134	6898	0.125	28.964	31.038		133	3797.01	0.163	2.019	20.168		133	3888.69	0.166	32.516	22.782		133	5932.32	0.254	44.663	0
134	62340	1.127	168.29	69.529		135	13463	0.243	38.202	16.157		135	6823	0.123	42.608	30.358		134	3448.45	0.148	17.482	22.966		134	3893.34	0.167	32.522	22.824		134	5061.97	0.217	47.41	29.421
135	84875	1.535	227.164	127.743		136	5529600	100	3.134e-13	0		136	6740	0.122	42.506	29.816		135	2336256	100	2.037e-13	0		135	3914.89	0.168	32.777	22.761		135	2336256	100	2.037e-13	0
136	66821	1.208	173.568	72.164		137	14456	0.261	41.178	20.871		137	6671	0.121	42.177	29.586		136	4302.74	0.184	16.521	24.879		136	3903.05	0.167	32.613	22.829		136	5964.43	0.255	47.33	29.447
137	60713	1.098	171.597	67.718		138	20923	0.378	38.456	105.241		138	6732	0.122	42.5	29.706		137	3447.18	0.148	5.041	25.124		137	3906.01	0.167	32.616	22.875		137	2336256	100	2.037e-13	0
138	71585	1.295	202.851	114.137		139	23599	0.427	49.813	104.113		139	6758	0.122	42.417	29.802		138	2336256	100	2.037e-13	0		138	3916.57	0.168	32.851	22.738		138	6606.21	0.283	46.871	0
139	51764	0.936	119.504	128.508		140	20332	0.368	70.277	45.371		140	6806	0.123	42.256	30.165		139	4069.94	0.174	19.157	29.727		139	3917.84	0.168	32.708	22.913		139	2336256	100	2.037e-13
140																		140	3395.21	0.145	1.802	29.912		140	3893.34	0.167	32.484	22.911		140	2336256	100	2.037e-13
HU87	Area µm²	area fraction (%)	withd µm	SD		CTRL	Area µm²	area fraction (%)	withd µm	SD		siSAM2	Area µm²	area fraction (%)	withd µm	SD
CTRL	934794	40.012	666.312	25.991		1	941228	40.288	670.598	20.088		1	872531	37.347	625.964	34.134		siSAM2	Area µm²	area fraction (%)	withd µm	SD		siSAM4	Area µm²	area fraction (%)	withd µm	SD		siSAM4	Area µm²	area fraction (%)	withd µm	SD
1	922844	39.501	656.55	24.79		2	922664	39.493	660.328	21.528		2	876468	37.516	633.8	32.672		1	985566	42.186	707.635	15.275		1	924719	39.581	630.471	42.281		1	790722	33.846	569.713	35.934
2	909151	38.915	647.66	29.324		3	914750	39.155	653.298	19.184		3	874386	37.427	627.282	34.2		2	988385	42.306	706.776	16.78		2	926152	39.643	634.55	48.935		2	785944	33.641	566.2	43.822
3	902540	38.632	644.611	32.403		4	899592	38.506	645.547	18.136		4	870443	37.258	622.56	33.965		3	979066	41.907	699.347	20.32		3	909733	38.94	626.742	43.848		3	779300	33.357	565.191	44.444
4	882624	37.779	632.193	33.155		5	891395	38.155	638.019	19.781		5	855866	36.634	612.399	29.184		4	968258	41.445	691.612	22.629		4	906371	38.796	624.452	43.956		4	766400	32.805	556.668	45.553
5	883469	37.816	630.491	30.52		6	880997	37.71	634.505	24.64		6	843801	36.118	605.126	29.845		5	952970	40.79	680.334	22.095		5	881606	37.736	612.279	47.818		5	750416	32.12	538.285	32.952
6	874676	37.439	624.049	31.155		7	868227	37.163	622.82	23.579		7	830691	35.556	593.845	29.29		6	937601	40.133	667.55	24.709		6	874534	37.433	605.533	45.555		6	744366	31.862	535.986	29.697
7	862459	36.916	615.704	32.784		8	864099	36.986	620.097	24.397		8	820063	35.102	585.94	28.468		7	921631	39.449	660.317	25.305		7	855317	36.611	590.72	38.148		7	741372	31.733	537.596	37.708
8	851125	36.431	608.444	36.65		9	853018	36.512	610.643	18.919		9	813082	34.803	582.442	35.487		8	908683	38.895	652.702	28.957		8	843399	36.1	580.215	36.022		8	724484	31.01	523.654	39.677
9	850141	36.389	612.433	45.491		10	848411	36.315	606.897	21.666		10	798333	34.171	570.609	26.078		9	901765	38.599	647.162	26.855		9	830041	35.529	575.738	36.137		9	711460	30.453	515.262	42.158
10	843084	36.087	602.097	36.588		11	838559	35.893	597.84	21.435		11	785730	33.632	563.794	26.687		10	893319	38.237	639.995	29.315		10	825204	35.322	569.871	34.666		10	701614	30.032	509.038	36.569
11	836843	35.82	597.076	36.367		12	834369	35.714	594.931	24.236		12	772638	33.072	554.245	28.189		11	873276	37.379	626.049	30.93		11	814822	34.877	561.08	31.169		11	692313	29.633	502.877	40.497
12	828345	35.456	591.336	34.34		13	822532	35.207	586.497	21.051		13	761485	32.594	546.627	26.406		12	864704	37.012	622.6	32.188		12	804637	34.441	559.709	38.185		12	676821	28.97	488.865	40.924
13	825051	35.315	589.83	34.662		14	815213	34.894	580.83	21.627		14	759095	32.492	546.169	29.848		13	859936	36.808	620.232	36.769		13	787615	33.713	541.865	35.259		13	667342	28.565	485.731	43.894
14	818548	35.037	584.971	34.181		15	802065	34.331	576.108	26.399		15	741469	31.737	532.232	28.766		14	843957	36.124	604.616	28.235		14	781418	33.447	543.461	43.25		14	652646	27.936	472.42	34.46
15	818195	35.022	583.996	32.664		16	793770	33.976	568.569	25.206		16	727099	31.122	523.002	29.442		15	829184	35.492	594.358	29.078		15	780954	33.428	540.933	45.054		15	641785	27.471	465.807	32.499
16	811398	34.731	579.511	31.561		17	782015	33.473	562.644	22.866		17	725433	31.051	520.113	24.589		16	818205	35.022	586.454	24.846		16	758813	32.48	520.862	36.622		16	636835	27.259	457.649	33.355
17	801782	34.319	574.13	32.92		18	774466	33.15	555.266	26.233		18	721180	30.869	518.166	27.145		17	810244	34.681	580.558	29.183		17	749644	32.087	513.728	34.647		17	625712	26.783	450.1	33.888
18	796069	34.075	570.585	32.349		19	767229	32.84	549.757	24.461		19	710220	30.4	511.013	29.46		18	803528	34.394	575.627	27.031		18	737203	31.555	511.664	37.941		18	620210	26.547	446.956	33.535
19	792420	33.918	567.451	31.716		20	761654	32.601	543.905	25.594		20	693266	29.674	498.026	26.423		19	792441	33.919	567.063	25.212		19	728954	31.202	503.689	35.491		19	611989	26.195	442.886	35.841
20	788224	33.739	566.499	33.258		21	754411	32.291	539.791	24.938		21	685140	29.326	492.698	22.027		20	777240	33.269	556.881	23.716		20	717322	30.704	495.079	37.808		20	602925	25.807	437.013	34.349
21	780287	33.399	560.277	33.095		22	751261	32.157	538.647	25.093		22	681262	29.16	489.308	24.39		21	772404	33.062	550.851	22.02		21	707028	30.263	496.057	40.732		21	594503	25.447	433.878	36.044
22	774552	33.154	558.851	33.233		23	743143	31.809	533.441	24.73		23	675064	28.895	484.31	25.78		22	764840	32.738	546.908	23.642		22	694064	29.708	485.831	47.987		22	582014	24.912	428.915	38.917
23	765174	32.752	551.258	30.87		24	739813	31.667	531.067	26.255		24	661559	28.317	475.131	29.065		23	751396	32.162	538.555	24.209		23	685031	29.322	484.995	59.165		23	570904	24.437	420.657	38.741
24	763307	32.672	550.709	29.543		25	736917	31.543	525.898	26.226		25	655940	28.077	472.653	27.557		24	739403	31.649	530.456	26.981		24	678055	29.023	481.08	57.933		24	562045	24.057	411.165	37.903
25	755309	32.33	544.466	31.829		26	729416	31.222	524.472	30.233		26	645238	27.618	466.302	27.437		25	728091	31.165	522.922	27.704		25	662040	28.338	458.406	37.759		25	550146	23.548	414.985	54.402
26	745297	31.901	534.135	31.459		27	719509	30.798	514.065	27.595		27	640354	27.409	464.062	27.561		26	719809	30.81	518.43	33.67		26	651609	27.891	454.528	39.259		26	536379	22.959	396.606	43.228
27	739871	31.669	529.051	32.463		28	715893	30.643	511.015	26.443		28	630735	26.998	455.085	28.481		27	710913	30.43	518.828	36.985		27	635880	27.218	443.202	39.591		27	529170	22.65	387.718	38.147
28	731270	31.301	524.331	31.16		29	712621	30.503	509.899	26.91		29	617906	26.449	448.665	27.832		28	699115	29.925	508.168	34.542		28	634287	27.15	454.95	65.237		28	516147	22.093	377.391	36.518
29	725959	31.074	520.456	32.352		30	708761	30.337	507.072	26.235		30	609348	26.082	440.388	29.062		29	688529	29.471	501.823	36.655		29	624562	26.733	437.047	43.81		29	507320	21.715	368.852	37.997
30	717101	30.694	514.143	31.747		31	697132	29.84	501.119	27.912		31	598306	25.61	430.087	25.275		30	680943	29.147	492.796	33.222		30	614689	26.311	438.174	55.63		30	499807	21.394	365.573	45.261
31	710032	30.392	510.181	32.54		32	690524	29.557	494.408	26.556		32	595916	25.507	431.483	32.87		31	670658	28.707	484.304	33.087		31	590636	25.281	414.163	52.104		31	482139	20.637	352.361	39.908
32	706964	30.261	508.106	31.065		33	684741	29.309	490.6	25.839		33	580731	24.857	419.467	26.763		32	671787	28.755	488.139	38.72		32	574271	24.581	401.944	33.526		32	473163	20.253	346.152	41.248
33	708511	30.327	505.927	31.403		34	680518	29.129	488.092	28.563		34	569707	24.385	410.629	25.218		33	656809	28.114	480.587	45.775		33	578381	24.757	414.587	51.65		33	455416	19.493	339.839	49.409
34	703239	30.101	502.431	30.955		35	673685	28.836	482.144	31.529		35	558161	23.891	402.694	27.091		34	643488	27.544	469.203	42.882		34	566944	24.267	407.026	44.766		34	449287	19.231	333.558	51.309
35	694430	29.724	496.552	29.653		36	663321	28.392	475.496	32.538		36	554432	23.732	400.367	28.352		35	635240	27.191	463.498	46.553		35	555399	23.773	405.541	52.123		35	431551	18.472	325.703	55.14
36	681985	29.191	491.583	30.21		37	655469	28.056	473.26	31.607		37	552900	23.666	400.491	25.485		36	633249	27.105	462.051	45.353		36	530587	22.711	372.252	37.338		36	413863	17.715	309.53	49.649
37	678226	29.03	489.464	28.688		38	646798	27.685	465.278	33.923		38	548123	23.462	397.689	30.951		37	623291	26.679	452.753	44.457		37	517120	22.135	363.677	37.625		37	404202	17.301	301.521	46.862
38	668033	28.594	482.182	31.691		39	641824	27.472	460.393	30.042		39	533717	22.845	389.48	30.284		38	616171	26.374	452.956	48.464		38	511106	21.877	368.212	38.807		38	395744	16.939	297.793	45.585
39	665890	28.502	481.069	34.13		40	636597	27.249	457.429	34.479		40	525266	22.483	387.02	33.582		39	605751	25.928	444.159	49.012		39	509540	21.81	371.701	57.775		39	384840	16.473	288.722	48.562
40	657887	28.16	477.875	34.32		41	625881	26.79	454.145	38.25		41	522353	22.359	382.155	34.926		40	606263	25.95	447.454	60.995		40	517868	22.167	368.349	53.807		40	370492	15.858	281.372	49.301
41	652364	27.923	471.353	34.663		42	615174	26.332	440.047	31.682		42	519422	22.233	382.52	40.473		41	594098	25.429	432.962	47.698		41	499094	21.363	365.692	55.782		41	349974	14.98	262.533	53.41
42	644170	27.573	468.831	40.171		43	612348	26.211	440.634	36.942		43	510479	21.85	375.661	43.417		42	592112	25.344	441.615	62.795		42	481320	20.602	355.227	55.641		42	336317	14.396	255.566	50.658
43	635689	27.21	466.873	40.2		44	608447	26.044	437.791	36.049		44	496847	21.267	368.207	45.211		43	584147	25.004	437.468	65.718		43	467849	20.026	343.133	64.44		43	328686	14.069	251.496	54.476
44	632766	27.085	459.976	40.827		45	598473	25.617	433.969	37.461		45	491264	21.028	363.364	46.733		44	558226	23.894	410.435	52.758		44	465907	19.942	343.774	64.748		44	318682	13.641	245.113	54.369
45	623212	26.676	453.309	37.905		46	589957	25.252	426.501	37.086		46	486463	20.822	359.323	49.238		45	551023	23.586	401.64	51.502		45	453523	19.412	336.697	62.648		45	306012	13.098	238.861	56.93
46	607344	25.996	442.386	38.971		47	577458	24.717	421.142	40.591		47	488882	20.926	360.491	53.574		46	549014	23.5	402.376	60.707		46	431335	18.463	316.663	59.243		46	295363	12.643	222.392	46.089
47	600632	25.709	435.829	40.995		48	574067	24.572	418.559	44.358		48	482885	20.669	360.458	51.359		47	539920	23.11	392.568	54.485		47	438506	18.77	337.697	94.027		47	285263	12.21	217.556	54.138
48	593998	25.425	431.205	40.681		49	569415	24.373	411.76	47.924		49	470559	20.142	351.286	53.228		48	528417	22.618	381.869	48.904		48	419045	17.937	320.825	74.631		48	278584	11.924	222.89	60.204
49	586042	25.085	426.364	45.525		50	554676	23.742	403.893	50.164		50	462840	19.811	350.547	55.188		49	509222	21.797	373.066	51.999		49	408365	17.479	296.274	55.088		49	279961	11.983	226.195	53.227
50	576276	24.667	416.26	43.359		51	545759	23.36	396.391	52.89		51	459666	19.675	352.488	58.372		50	504477	21.593	367.054	59.844		50	392341	16.794	281.947	57.173		50	266837	11.422	215.609	56.939
51	565525	24.206	410.672	42.974		52	537027	22.987	391.198	53.617		52	466577	19.971	347.278	61.768		51	496337	21.245	367.336	60.495		51	379755	16.255	285.729	68.239		51	256858	10.994	202.679	54.569
52	558019	23.885	408.036	48.197		53	534838	22.893	391.237	53.287		53	461309	19.746	345.025	56.417		52	490176	20.981	367.597	61.812		52	368040	15.753	267.17	74.119		52	249039	10.66	197.772	60.04
53	549836	23.535	397.355	35.627		54	533405	22.832	394.621	47.503		54	444369	19.021	334.463	60.923		53	483768	20.707	363.897	65.279		53	360567	15.434	263.056	72.87		53	240894	10.311	186.444	47.494
54	543825	23.278	391.738	33.714		55	540589	23.139	395.964	51.672		55	437690	18.735	325.989	61.94		54	465662	19.932	341.854	60.254		54	343923	14.721	248.666	57.882		54	237662	10.173	184.967	62.128
55	536264	22.954	387.762	38.999		56	525108	22.476	388.027	53.19		56	425115	18.196	317.764	60.222		55	462605	19.801	344.325	58.318		55	334446	14.315	244.919	57.726		55	236027	10.103	184.162	56.952
56	526004	22.515	377.107	30.499		57	527662	22.586	385.779	52.846		57	426137	18.24	321.83	63.117		56	455875	19.513	346.946	59.173		56	316959	13.567	233.639	55.692		56	226837	9.709	191.584	74.582
57	518479	22.193	374.017	33.292		58	512431	21.934	382.347	52.685		58	421348	18.035	320.697	64.508		57	453298	19.403	342.157	55.802		57	304889	13.05	217.797	53.707		57	204624	8.759	159.271	67.317
58	506322	21.672	365.706	36.76		59	499202	21.368	367.649	54.873		59	423965	18.147	320.815	67.669		58	444965	19.046	337.48	64.415		58	286347	12.257	212.553	53.357		58	204236	8.742	158.718	66.836
59	494091	21.149	356.885	34.373		60	492778	21.093	364.206	52.078		60	401586	17.189	305.771	63.223		59	450870	19.299	339.908	63.829		59	285938	12.239	206.212	51.116		59	149938	6.418	153.276	69.606
60	488621	20.915	353.239	36.082		61	491290	21.029	362.457	51.847		61	395287	16.92	307.869	64.9		60	430179	18.413	325.174	58.81		60	275074	11.774	201.769	45.807		60	147673	6.321	149.919	68.506
61	485290	20.772	355.782	45.333		62	486273	20.814	367.069	56.963		62	387713	16.595	299.552	68.106		61	425730	18.223	314.873	60.156		61	267278	11.44	196.314	45.385		61	142821	6.113	157.146	84.794
62	474537	20.312	347.015	39.042		63	475126	20.337	353.775	52.049		63	379968	16.264	294.789	72.036		62	405646	17.363	299.914	66.127		62	265580	11.368	201.702	62.619		62	134306	5.749	143.782	67.479
63	467189	19.997	348.214	50.276		64	469356	20.09	358.457	47.52		64	372289	15.935	294.694	71.383		63	390245	16.704	294.185	68.515		63	255977	10.957	192.89	53.649		63	128554	5.503	145.645	71.263
64	456758	19.551	341.401	44.327		65	451881	19.342	331.941	53.732		65	362114	15.5	293.348	73.671		64	368101	15.756	275.65	70.152		64	247571	10.597	185.371	58.99		64	116564	4.989	131.397	77.02
65	458027	19.605	340.416	51.718		66	444798	19.039	330.74	53.065		66	345333	14.781	277.096	72.387		65	369621	15.821	283.06	69.689		65	243354	10.416	188.193	65.913		65	148254	6.346	120.332	70.934
66	457119	19.566	339.859	57.612		67	433315	18.547	316.984	54.183		67	330189	14.133	263.656	77.743		66	368773	15.785	290.274	65.282		66	230054	9.847	170.103	57.026		66	97396.8	4.169	123.276	74
67	445388	19.064	336.048	53.538		68	428210	18.329	315.53	57.445		68	298481	12.776	245.655	84.888		67	343287	14.694	267.749	82.237		67	216589	9.271	163.772	61.657		67	91365.2	3.911	121.846	70.766
68	437841	18.741	343.579	69.918		69	422134	18.069	323.743	55.313		69	310172	13.276	252.028	74.405		68	346293	14.823	268.239	71.392		68	207927	8.9	164.92	65.499		68	76190.7	3.261	138.211	91.171
69	416209	17.815	314.088	53.058		70	420149	17.984	308.195	52.59		70	296223	12.679	243.753	75.974		69	360526	15.432	273.726	67.433		69	196516	8.412	162.326	66.916		69	68621.2	2.937	118.672	70.818
70	407099	17.425	304.515	47.224		71	409788	17.54	312.746	61.637		71	300036	12.843	237.646	73.004		70	350743	15.013	275.135	78.796		70	171012	7.32	156.861	61.639		70	72594.8	3.107	99.862	66.865
71	428183	18.328	319.386	56.355		72	405082	17.339	303.123	50.732		72	283356	12.129	234.069	72.126		71	350295	14.994	275.943	75.659		71	168515	7.213	170.178	74.863		71	63331.5	2.711	113.09	65.71
72	400937	17.162	302.984	47.517		73	400862	17.158	298.143	47.723		73	270618	11.583	244.228	74.621		72	315427	13.501	244.022	69.715		72	156985	6.72	151.969	59.934		72	58131.8	2.488	121.781	59.813
73	391733	16.768	300.295	44.878		74	393386	16.838	293.47	57.038		74	253495	10.85	225.494	73.351		73	311215	13.321	244.571	70.939		73	152678	6.535	191.724	96.05		73	64727.8	2.771	104.577	71.734
74	388695	16.638	305.065	61.996		75	383894	16.432	294.755	51.688		75	244525	10.467	210.243	68.742		74	293796	12.576	233.844	70.028		74	142267	6.09	162.868	92.73		74	63070.8	2.7	105.011	64.354
75	368230	15.762	291.679	58.8		76	369564	15.819	285.343	57.011		76	248046	10.617	211.463	73.651		75	299451	12.818	244.278	83.556		75	130995	5.607	147.554	70.26		75	54354.2	2.327	118.27	62.433
76	360983	15.451	278.63	56.969		77	366251	15.677	283.919	56.409		77	233145	9.979	206.853	71.821		76	289753	12.402	243.196	92.943		76	123096	5.269	131.208	60.485		76	50738.4	2.172	119.141	66.942
77	372856	15.96	279.882	60.294		78	371002	15.88	284.07	59.018		78	123305	5.278	201.939	70.054		77	266958	11.427	226.58	99.102		77	110809	4.743	162.242	62.681		77	50368.3	2.156	114.918	59.759
78	344094	14.728	259.429	64.201		79	356474	15.258	275.467	57.45		79	122908	5.261	201.361	58.412		78	257163	11.007	209.147	91.995		78	125611	5.377	144.182	87.193		78	50047.2	2.142	113.109	59.71
79	338319	14.481	256.393	63.492		80	345842	14.803	272.463	60.16		80	216519	9.268	199.693	74.423		79	242576	10.383	200.826	96.231		79	111445	4.77	124.015	81.584		79	53247.7	2.279	108.194	55.706
80	332480	14.231	254.695	65.467		81	332931	14.251	278.05	71.302		81	156542	6.701	205.021	65.238		80	249947	10.699	199.993	92.463		80	79900.7	3.42	100.191	57.75		80	40853.2	1.749	120.756	61.731
81	328842	14.076	255.828	74.926		82	315708	13.513	250.964	64.23		82	72579.6	3.107	170.451	77.27		81	247471	10.593	196.5	93.615		81	86241.1	3.691	100.02	81.414		81	40137.9	1.718	132.92	63.358
82	320651	13.725	246.706	76.95		83	321267	13.751	272.051	78.195		83	171363	7.335	200.094	89.657		82	244445	10.463	200.11	84.807		82	77551.1	3.319	101.381	64.695		82	33961.8	1.454	123.239	52.011
83	322780	13.816	255.844	92.643		84	303741	13.001	253.945	79.586		84	136203	5.83	144.083	71.94		83	224328	9.602	175.797	85.531		83	71679.7	3.068	74.198	35.182		83	29096.3	1.245	94.943	59.405
84	310997	13.312	247.338	81.793		85	289497	12.391	237.185	88.784		85	80621.9	3.451	155.141	84.93		84	218752	9.363	184.781	94.684		84	61137	2.617	131.403	90.131		84	27396.2	1.173	97.888	44.618
85	314684	13.47	243.948	80.687		86	303803	13.004	242.05	69.936		86	82284.8	3.522	124.745	56.188		85	198686	8.504	166.696	78.452		85	61004.4	2.611	97.155	45.491		85	25110.9	1.075	91.305	41.443
86	288524	12.35	219.212	63.834		87	294730	12.615	227.835	71.992		87	100107	4.285	182.653	87.541		86	199810	8.553	166.027	79.82		86	53629.2	2.296	92.216	41.3		86	23753	1.017	85.956	41.121
87	281676	12.057	229.034	76.087		88	276762	11.846	211.294	65.951		88	150067	6.423	163.701	87.941		87	197236	8.442	159.199	87.814		87	66178.7	2.833	97.336	56.272		87	19322.2	0.827	70.144	29.847
88	273371	11.701	220.231	71.613		89	273402	11.703	208.504	68.809		89	120170	5.144	119.809	65.239		88	187936	8.044	178.295	90.641		88	35542.8	1.521	87.459	49.023		88	18261.3	0.782	65.48	27.892
89	265826	11.378	206.251	73.436		90	259264	11.097	206.262	76.604		90	124563	5.332	136.399	77.998		89	91012.8	3.896	155.253	64.062		89	21579.6	0.924	41.397	82.378		89	17835	0.763	65.532	35.466
90	266233	11.396	216.93	87.803		91	214462	9.18	210.898	72.097		91	93066.2	3.984	154.224	82.804		90	88842	3.803	153.742	67.548		90	41626.4	1.782	83.286	54.924		90	17055.9	0.73	63.006	52.089
91	276397	11.831	211.906	82.992		92	242030	10.36	220.574	76.95		92	87714.4	3.754	109.759	55.134		91	78894.3	3.377	148.455	92.334		91	29257.3	1.252	74.728	59.989		91	13784.5	0.59	56.293	36.682
92	245988	10.529	188.049	72.89		93	237506	10.166	190.906	76.686		93	71239.4	3.049	142.836	74.198		92	76028.9	3.254	140.315	47.846		92	22512.1	0.964	65.654	67.805		92	11863.4	0.508	50.205	41.952
93	238800	10.221	183.772	69.705		94	208822	8.938	186.052	63.65		94	77459.5	3.316	149.975	77.539		93	78796.2	3.373	146.969	62.56		93	20688.1	0.886	61.751	58.016		93	10050	0.43	45.606	36.297
94	226337	9.688	178.38	74.548		95	208284	8.915	189.844	71.152		95	79112.7	3.386	179.653	77.606		94	78953.8	3.38	145.206	65.347		94	21472.7	0.919	65.139	55.096		94	10439.1	0.447	60.17	36.291
95	224618	9.614	183.68	87.821		96	204551	8.756	185.213	69.913		96	62834.6	2.69	120.231	62.096		95	81709.4	3.497	156.961	57.92		95	14343.5	0.614	70.775	55.756		95	11035.7	0.472	47.932	83.261
96	220039	9.418	180.097	76.884		97	102582	4.391	174.146	71.989		97	61683.3	2.64	154.956	79.575		96	73738.5	3.156	136.836	64.614		96	19560.9	0.837	69.163	57.886		96	9277.25	0.397	1.218	61.473
97	224441	9.607	197.343	88.71		98	208996	8.946	175.063	79.225		98	52375.2	2.242	108.925	79.188		97	69508	2.975	129.668	64.197		97	10685	0.457	34.606	54.623		97	7041.81	0.301	37.898	42.574
98	208404	8.92	183.385	70.187		99	106266	4.549	148.405	90.815		99	42953.9	1.839	76.225	34.911		98	75182.2	3.218	127.158	63.935		98	20678.8	0.885	61.395	46.004		98	5706.28	0.244	8.492	43.47
99	196426	8.408	173.428	68.838		100	101734	4.355	145.655	86.202		100	37711.9	1.614	107.516	84.73		99	68516.8	2.933	109.952	55.985		99	19934.4	0.853	76.496	62.282		99	6196.81	0.265	13.312	45.192
100	185990	7.961	162.862	75.71		101	161253	6.902	165.873	80.343		101	39805.8	1.704	101.517	76.462		100	65609.6	2.808	107.076	57.673		100	12744.7	0.546	74.582	59.639		100	6506.08	0.278	35.021	37.993
101	138721	5.938	192.907	93.252		102	157733	6.752	165.35	73.678		102	35705.9	1.528	103.204	76.155		101	66078.2	2.828	150.798	71.476		101	9699.33	0.415	44.666	32.374		101	7228.98	0.309	39.814	30.733
102	173020	7.406	164.592	92.578		103	73962.4	3.166	164.158	83.025		103	14337.5	0.614	69.93	36.497		102	54222.4	2.321	87.207	40.598		102	5812.33	0.249	36.841	26.734		102	5244.49	0.224	33.816	18.887
103	129517	5.544	179.957	77.349		104	146449	6.269	150.855	76.473		104	32348.3	1.385	90.403	67.669		103	51378.1	2.199	102.046	61.352		103	5857.12	0.251	41.677	27.838		103	3164.53	0.135	30.325	20.48
104	122069	5.225	160.245	79.513		105	144501	6.185	148.358	76.055		105	31050.8	1.329	85.36	64.199		104	49937.4	2.137	85.8	57.016		104	6988.15	0.299	37.848	27.739		104	3146.36	0.135	29.277	21.286
105	123802	5.299	193.942	90.793		106	141162	6.042	142.302	72.974		106	30769	1.317	85.426	65.959		105	41558.8	1.779	79.471	55.158		105	7786.25	0.333	39.857	28.714		105	3154.39	0.135	29.661	20.952
106	113788	4.871	162.247	83.698		107	138791	5.941	146.464	61.854		107	13759.1	0.589	73.957	39.813		106	40732.4	1.743	90.063	53.969		106	5683.47	0.243	45.158	35.973		106	3147.62	0.135	28.553	21.672
107	111872	4.789	171.366	101.022		108	70286.3	3.008	128.402	67.804		108	13847.9	0.593	69.115	44.083		107	38600	1.652	94.416	51.72		107	5878.66	0.252	46.353	27.206		107	3144.67	0.135	28.556	21.632
108	113537	4.86	188.87	97.834		109	68935.1	2.951	117.873	66.773		109	16892.4	0.723	73.794	67.116		108	33946.2	1.453	93.05	43.061		108	4509.77	0.193	31.084	19.669		108	3137.06	0.134	27.987	22.007
109	101932	4.363	177.935	88.448		110	70453.6	3.016	119.647	62.715		110	16222.3	0.694	59.009	84.812		109	30582.2	1.309	85.312	41.912		109	5777.27	0.247	13.009	33.639		109	3144.24	0.135	28.592	21.572
110	103847	4.445	147.391	88.23		111	109369	4.681	124.791	63.619		111	16139.5	0.691	65.29	44.932		110	28325.7	1.212	80.365	43.579		110	6386.51	0.273	28.602	33.292		110	3705.75	0.159	16.878	11.925
111	103687	4.438	180.722	83.188		112	61622	2.638	123.905	60.686		112	15801.5	0.676	59	38.427		111	25686.3	1.099	71.157	39.964		111	5680.51	0.243	47.834	29.129		111	4319.22	0.185	20.471	15.835
112	96597.9	4.135	152.196	80.138		113	60813	2.603	121.93	63.574		113	14743.1	0.631	61.615	35.375		112	27024.4	1.157	63.707	41.56		112	4841.85	0.207	37.676	20.901		112	4094.87	0.175	18.785	16.261
113	84210.6	3.605	135.896	69.821		114	54074.9	2.315	111.918	67.26		114	16822.7	0.72	70.956	36.767		113	24570.9	1.052	55.389	35.111		113	5567.28	0.238	44.217	28.847		113	3946.15	0.169	37.903	22.448
114	80820.9	3.459	121.946	73.922		115	51452.5	2.202	106.575	70.245		115	14824.7	0.635	48.282	40.438		114	21035.4	0.9	58.864	28		114	5372.09	0.23	49.024	24.386		114	3225.36	0.138	33.592	20.329
115	70165.4	3.003	107.491	71.948		116	48121.9	2.06	103.949	63.315		116	17159	0.734	65.757	34.601		115	19065.3	0.816	52.399	24.202		115	5145.2	0.22	40.692	27.018		115	3196.64	0.137	28.909	21.262
116	68245.6	2.921	102.289	67.196		117	68055	2.913	99.228	61.302		117	13225.1	0.566	56.487	29.528		116	22480	0.962	69.154	53.283		116	4426.11	0.189	19.434	28.016		116	3282.4	0.14	8.781	46.573
117	40076.7	1.715	112.078	52.045		118	42338.7	1.812	101.024	61.258		118	9270.5	0.397	48.353	33.008		117	14076.9	0.603	54.265	18.787		117	5198.44	0.223	38.359	24.934		117	4120.64	0.176	15.873	23.304
118	42378.9	1.814	118.301	78.802		119	41451.9	1.774	99.52	62.333		119	12459.1	0.533	61.95	32.899		118	13181.2	0.564	48.318	31.175		118	4051.78	0.173	28.22	22.223		118	4115.99	0.176	19.5	27.533
119	62033.1	2.655	99.232	81.173		120	25738.3	1.102	23.415	62.46		120	13920.5	0.596	67.676	20.238		119	12841	0.55	51.523	24.97		119	5149.43	0.22	38.78	26.061		119	3895.45	0.167	17.275	27.099
120	44949.8	1.924	130.224	79.601		121	34269.4	1.467	89.267	65.416		121	9478.79	0.406	54.142	27.107		120	12906.5	0.552	49.342	23.468		120	4051.35	0.173	31.585	15.761		120	3118.05	0.133	28.082	21.48
121	43484.1	1.861	110.072	63.191		122	24048.3	1.029	21.869	54.244		122	8022.85	0.343	63.461	22.034		121	11209.8	0.48	46.415	20.974		121	4312.03	0.185	5.668	34.721		121	3114.67	0.133	28.488	21.398
122	42425.3	1.816	112.577	65.985		123	24322.5	1.041	31.374	44.629		123	6405.52	0.274	50.632	22.528		122	10371.5	0.444	45.289	25.525		122	2962.99	0.127	33.209	20.693		122	3179.31	0.136	28.22	21.786
123	37620.2	1.61	103.477	60.398		124	22099.3	0.946	9.181	59.246		124	8740.26	0.374	70.16	28.093		123	5949.22	0.255	37.295	25.732		123	3081.29	0.132	29.389	19.21		123	3194.1	0.137	28.555	21.602
124																		124	5090.28	0.218	43.169	31.171		124	3126.5	0.134	29.863	19.255		124	3232.12	0.138	20.55	27.086
