# Supplementary material for: Coalescent RNA-localizing and transcriptional activities of SAM68 modulate adhesion and subendothelial basement membrane assembly
Source: eLife journal article supplement (doi:10.7554/elife.85165), 2023-07-26
Supplement: fig7-data3 [file Figure 7 source data 3.xlsx]

## Sheet: 3D HUVEC summary
Averages of the 4 independent experiments
Experiments ID	n(cells tot)	n(sprouts)	n(cells)	Total sprout area (µm²)	Total network length (µm)	Average sprout length (µm)	Average sprout width (µm)	Average junctions per sprout	Cell density (1/µm²)
HU107 ctrl	66.1667	12.9167	52.5	67018.4	3581.86	284.916	0.0755992	3.83333	0.205882
HU107 siSAM68-1	66.0833	13.5	41.5	51758.4	2490.16	189.773	0.110773	2.25	0.162745
HU107 siSAM68-2	66.3636	12.6364	34.5455	58615.3	2943.77	237.601	0.09911	3.09091	0.135473
HU111 ctrl	93.6667	14.0833	88.9167	126072	6615.66	478.33	0.0409133	7.33333	0.348693
HU111 siSAM68-1	87.75	11.75	54	92459.4	3778.49	332.483	0.0883175	4.08333	0.211765
HU111 siSAM68-2	95.1818	14.6364	59	83301.5	4857.84	348.915	0.0550891	5.09091	0.231373
HU112 ctrl	102.417	12	77	129216	5098.52	438.453	0.0509167	5.16667	0.301962
HU112 siSAM68-1	104.333	14.1111	44.4444	82422.3	3649.37	257.699	0.0782711	3.11111	0.174292
HU112 siSAM68-2	86.8333	12.3333	32.1667	68657.8	2818.79	237.566	0.100032	2.58333	0.126142
HU113 ctrl	110.909	12.9091	98.7273	127189	6073.77	477.254	0.0426327	6.90909	0.402495
HU113 siSAM68-1	79	12.5833	59.4167	68248.7	3142.12	262.755	0.0869867	3.33333	0.233008
HU113 siSAM68-2	87.2727	12.2727	46.1818	76268.5	3092.19	259.065	0.0896482	2.90909	0.181105
RAW DATA
Experiment 1 (ID: HU107)	n(cells tot)	n(sprouts)	n(cells)	Total sprout area (µm²)	Total network length (µm)	Average sprout length (µm)	Average sprout width (µm)	Average junctions per sprout	Cell density (1/µm²)		Label	n(cells total)	n(sprouts)	n(cells)	Total sprout area (µm²)	Total network length (µm)	Average sprout length (µm)	Average sprout width (µm)	Average junctions per sprout	Cell density (1/µm²)		Label	n(cell total)	n(sprouts)	n(cells)	Total sprout area (µm²)	Total network length (µm)	Average sprout length (µm)	Average sprout width (µm)	Average junctions per sprout	Cell density (1/µm²)
Label
MAX_HU107_3DH_CTRL_1.tif	59	9	43	54643	2991.22	332.358	0.08525	4	0.16863		MAX_HU107_3DH_siSAM68-1_1.tif	44	14	31	45121	2243.77	160.269	0.11365	2	0.12157		MAX_HU107_3DH_siSAM68-2_1.tif	60	15	29	43278	2582.41	172.161	0.09874	2	0.11373
MAX_HU107_3DH_CTRL_2.tif	85	16	64	60386	4756.85	297.303	0.05361	4	0.25098		MAX_HU107_3DH_siSAM68-1_2.tif	89	13	65	42388	3427.14	263.626	0.07441	4	0.2549		MAX_HU107_3DH_siSAM68-2_2.tif	88	17	54	75979	3971.26	233.604	0.06421	3	0.21176
MAX_HU107_3DH_CTRL_3.tif	76	15	59	52254	3067.79	204.519	0.08312	2	0.23137		MAX_HU107_3DH_siSAM68-1_3.tif	71	16	43	64318	2472.66	154.541	0.10313	2	0.16863		MAX_HU107_3DH_siSAM68-2_3.tif	63	13	17	21834	1399.65	107.665	0.18219	1	0.06667
MAX_HU107_3DH_CTRL_4.tif	53	10	43	98802	3678.23	367.823	0.06933	5	0.16863		MAX_HU107_3DH_siSAM68-1_4.tif	68	14	44	45930	3141.3	224.378	0.08118	2	0.17255		MAX_HU107_3DH_siSAM68-2_4.tif	57	7	20	38556	2259.87	322.838	0.11284	4	0.07843
MAX_HU107_3DH_CTRL_5.tif	52	11	43	87284	3613.16	328.469	0.07058	4	0.16863		MAX_HU107_3DH_siSAM68-1_5.tif	51	11	38	59901	2063.35	187.578	0.12359	2	0.14902		MAX_HU107_3DH_siSAM68-2_5.tif	62	12	38	60506	3319.22	276.602	0.07683	4	0.14902
MAX_HU107_3DH_CTRL_6.tif	55	13	45	57456	2331.82	179.371	0.10936	1	0.17647		MAX_HU107_3DH_siSAM68-1_6.tif	53	10	40	36947	2669.22	266.922	0.09553	4	0.15686		MAX_HU107_3DH_siSAM68-2_6.tif	53	14	26	36080	2142.98	153.07	0.11899	2	0.10196
MAX_HU107_3DH_CTRL_7.tif	63	11	56	72753	4926.97	447.906	0.05176	7	0.21961		MAX_HU107_3DH_siSAM68-1_7.tif	78	13	31	50595	2141.75	164.75	0.11906	2	0.12157		MAX_HU107_3DH_siSAM68-2_7.tif	98	16	58	102169	4955.42	309.714	0.05146	5	0.22745
MAX_HU107_3DH_CTRL_8.tif	53	12	45	74104	2657.22	221.435	0.09596	3	0.17647		MAX_HU107_3DH_siSAM68-1_8.tif	68	20	44	34702	2219.19	110.96	0.11491	1	0.17255		MAX_HU107_3DH_siSAM68-2_8.tif	65	13	48	93857	4578.58	352.199	0.05569	5	0.18824
MAX_HU107_3DH_CTRL_9.tif	78	14	53	46618	3894.02	278.144	0.06549	4	0.20784		MAX_HU107_3DH_siSAM68-1_9.tif	53	16	43	63790	3416.93	213.558	0.07463	3	0.16863		MAX_HU107_3DH_siSAM68-2_10.tif	66	13	32	53217	2647.45	203.65	0.09632	3	0.12549
MAX_HU107_3DH_CTRL_10.tif	76	16	59	81374	3214.07	200.879	0.07934	3	0.23137		MAX_HU107_3DH_siSAM68-1_10.tif	62	16	34	63864	2190.72	136.92	0.1164	2	0.13333		MAX_HU107_3DH_siSAM68-2_11.tif	43	10	21	48129	1856.22	185.622	0.13738	2	0.08235
MAX_HU107_3DH_CTRL_11.tif	56	14	47	53937	2722.3	194.45	0.09367	3	0.18431		MAX_HU107_3DH_siSAM68-1_11.tif	50	11	47	69672	2734.33	248.575	0.09326	2	0.18431		MAX_HU107_3DH_siSAM68-2_12.tif	75	9	37	71163	2668.37	296.486	0.09556	3	0.1451
MAX_HU107_3DH_CTRL_12.tif	88	14	73	64610	5128.73	366.338	0.04972	6	0.28627		MAX_HU107_3DH_siSAM68-1_12.tif	106	8	38	43873	1161.57	145.196	0.21953	1	0.14902
Experiment 2 (ID: HU111)	n(cells tot)	n(sprouts)	n(cells)	Total sprout area (µm²)	Total network length (µm)	Average sprout length (µm)	Average sprout width (µm)	Average junctions per sprout	Cell density (1/µm²)		Label	n(beads)	n(sprouts)	n(cells)	Total sprout area (µm²)	Total network length (µm)	Average sprout length (µm)	Average sprout width (µm)	Average junctions per sprout	Cell density (1/µm²)		Label	n(beads)	n(sprouts)	n(cells)	Total sprout area (µm²)	Total network length (µm)	Average sprout length (µm)	Average sprout width (µm)	Average junctions per sprout	Cell density (1/µm²)
Label
MAX_HU111_3DH_CTRL_1.tif	72	12	64	79398	4549.5	379.125	0.05605	6	0.25098		MAX_HU111_3DH_siSAM68-1_1.tif	95	11	79	110028	5746.58	522.417	0.04437	8	0.3098		MAX_HU111_3DH_siSAM68-2_5.tif	76	19	53	76926	4721.52	248.501	0.05401	3	0.20784
MAX_HU111_3DH_CTRL_2.tif	71	13	52	86591	5263.17	404.859	0.04845	6	0.20392		MAX_HU111_3DH_siSAM68-1_2.tif	80	18	36	72362	3150.37	175.021	0.08094	2	0.14118		MAX_HU111_3DH_siSAM68-2_6.tif	113	19	62	52849	3088.61	162.558	0.08256	2	0.24314
MAX_HU111_3DH_CTRL_3.tif	75	16	112	121834	6407.53	400.471	0.0398	6	0.43922		MAX_HU111_3DH_siSAM68-1_3.tif	54	13	24	82804	3567.14	274.396	0.07149	3	0.09412		MAX_HU111_3DH_siSAM68-2_9.tif	83	11	50	69114	4101.03	372.821	0.06218	6	0.19608
MAX_HU111_3DH_CTRL_4.tif	69	15	87	144782	6987.01	465.801	0.0365	7	0.34118		MAX_HU111_3DH_siSAM68-1_4.tif	91	11	34	91276	3823.54	347.595	0.06669	5	0.13333		MAX_HU111_3DH_siSAM68-2_1.tif	104	14	78	98821	5239.92	374.28	0.04866	5	0.30588
MAX_HU111_3DH_CTRL_5.tif	153	19	120	103777	5205.36	273.966	0.04899	3	0.47059		MAX_HU111_3DH_siSAM68-1_5.tif	121	12	104	126771	4550.61	379.217	0.05604	4	0.40784		MAX_HU111_3DH_siSAM68-2_3.tif	115	16	71	92611	5058.21	316.138	0.05041	5	0.27843
MAX_HU111_3DH_CTRL_6.tif	98	14	77	109504	5918.89	422.778	0.04308	6	0.30196		MAX_HU111_3DH_siSAM68-1_6.tif	72	14	48	108274	4755.41	339.672	0.05362	4	0.18824		MAX_HU111_3DH_siSAM68-2_4.tif	69	12	23	87616	5059.65	421.637	0.0504	8	0.0902
MAX_HU111_3DH_CTRL_7.tif	112	13	107	168248	8114.19	624.169	0.03143	10	0.41961		MAX_HU111_3DH_siSAM68-1_7.tif	105	13	101	159716	5369.62	413.048	0.04749	5	0.39608		MAX_HU111_3DH_siSAM68-2_7.tif	108	13	65	120367	6573.74	505.672	0.03879	8	0.2549
MAX_HU111_3DH_CTRL_8.tif	94	13	96	124309	5927.24	455.942	0.04302	7	0.37647		MAX_HU111_3DH_siSAM68-1_8.tif	103	9	83	127093	5150.07	572.229	0.04951	7	0.32549		MAX_HU111_3DH_siSAM68-2_8.tif	102	16	57	95037	4209.15	263.072	0.06058	3	0.22353
MAX_HU111_3DH_CTRL_9.tif	99	13	81	98706	4857.1	373.623	0.0525	4	0.31765		MAX_HU111_3DH_siSAM68-1_9.tif	101	11	29	34245	1173.01	106.637	0.21739	0	0.11373		MAX_HU111_3DH_siSAM68-2_10.tif	78	16	23	64811	3687.38	230.461	0.06915	3	0.0902
MAX_HU111_3DH_CTRL_10.tif	71	10	65	127314	6585.94	658.594	0.03872	11	0.2549		MAX_HU111_3DH_siSAM68-1_10.tif	74	10	27	39918	1530.6	153.06	0.1666	1	0.10588		MAX_HU111_3DH_siSAM68-2_11.tif	60	13	56	55008	4965.19	381.938	0.05136	5	0.21961
MAX_HU111_3DH_CTRL_11.tif	112	18	127	178899	10525.6	584.757	0.02423	11	0.49804		MAX_HU111_3DH_siSAM68-1_11.tif	50	10	24	41136	1664.42	166.442	0.15321	2	0.09412		MAX_HU111_3DH_siSAM68-2_12.tif	139	12	111	103157	6731.81	560.984	0.03788	8	0.43529
MAX_HU111_3DH_CTRL_12.tif	126	13	79	169504	9046.33	695.872	0.02819	11	0.3098		MAX_HU111_3DH_siSAM68-1_12.tif	107	9	59	115890	4860.56	540.062	0.05246	8	0.23137
Experiment 3 (ID: HU112)	n(cells tot)	n(sprouts)	n(cells)	Total sprout area (µm²)	Total network length (µm)	Average sprout length (µm)	Average sprout width (µm)	Average junctions per sprout	Cell density (1/µm²)		Label	n(beads)	n(sprouts)	n(cells)	Total sprout area (µm²)	Total network length (µm)	Average sprout length (µm)	Average sprout width (µm)	Average junctions per sprout	Cell density (1/µm²)		Label	n(beads)	n(sprouts)	n(cells)	Total sprout area (µm²)	Total network length (µm)	Average sprout length (µm)	Average sprout width (µm)	Average junctions per sprout	Cell density (1/µm²)
Label
MAX_HU112_3DH_CTRL_1.tif	130	13	90	150253	6004.32	461.87	0.04247	6	0.35294	1	MAX_HU112_3DH_siSAM68-1_1.tif	91	15	56	77161	3246.55	216.437	0.07854	3	0.21961		MAX_HU112_3DH_siSAM68-2_1.tif	89	18	33	74715	3233.6	179.645	0.07886	2	0.12941
MAX_HU112_3DH_CTRL_2.tif	98	12	76	115446	5085.04	423.753	0.05015	5	0.29804	2	MAX_HU112_3DH_siSAM68-1_2.tif	82	11	37	79477	2990.84	271.895	0.08526	3	0.1451		MAX_HU112_3DH_siSAM68-2_2.tif	67	11	28	51303	1840.78	167.344	0.13853	1	0.1098
MAX_HU112_3DH_CTRL_3-1.tif	96	13	62	98204	3800.45	292.342	0.0671	3	0.24314	3	MAX_HU112_3DH_siSAM68-1_3.tif	113	13	63	106345	3537.74	272.134	0.07208	3	0.24706		MAX_HU112_3DH_siSAM68-2_3.tif	105	8	63	106465	4426.68	553.335	0.05761	7	0.24706
MAX_HU112_3DH_CTRL_4.tif	104	14	75	114775	4673.25	333.803	0.05457	4	0.29412	4	MAX_HU112_3DH_siSAM68-1_4.tif	73	13	21	83338	3801.42	292.417	0.06708	4	0.08235		MAX_HU112_3DH_siSAM68-2_4.tif	121	15	54	93198	3884.54	258.97	0.06564	3	0.21176
MAX_HU112_3DH_CTRL_5.tif	112	16	94	113953	5006.66	312.916	0.05093	3	0.36863	5	MAX_HU112_3DH_siSAM68-1_5.tif	100	14	35	52426	2302.79	164.485	0.11074	2	0.13725		MAX_HU112_3DH_siSAM68-2_5.tif	92	13	39	96550	4251.87	327.067	0.05997	4	0.15294
MAX_HU112_3DH_CTRL_6.tif	105	12	76	148171	5832.03	486.003	0.04372	6	0.29804	6	MAX_HU112_3DH_siSAM68-1_6.tif	152	13	50	114649	5101.43	392.418	0.04999	4	0.19608		MAX_HU112_3DH_siSAM68-2_6.tif	81	12	15	46543	2039.33	169.944	0.12504	2	0.05882
MAX_HU112_3DH_CTRL_7.tif	79	8	90	149265	5474.58	684.323	0.04658	8	0.35294	7	MAX_HU112_3DH_siSAM68-1_7.tif	97	12	10	36198	1844.45	153.704	0.13825	1	0.03922		MAX_HU112_3DH_siSAM68-2_7.tif	71	10	22	49831	1990.49	199.049	0.12811	2	0.08627
MAX_HU112_3DH_CTRL_8.tif	116	12	94	146137	5873.06	489.422	0.04342	6	0.36863	8	MAX_HU112_3DH_siSAM68-1_8.tif	136	17	70	88369	4598.81	270.518	0.05545	4	0.27451		MAX_HU112_3DH_siSAM68-2_8.tif	79	13	26	53876	2082.72	160.209	0.12244	2	0.10196
MAX_HU112_3DH_CTRL_9.tif	87	12	70	127137	4499.63	374.97	0.05667	4	0.27451	9	MAX_HU112_3DH_siSAM68-1_9.tif	95	19	58	103838	5420.31	285.279	0.04705	4	0.22745		MAX_HU112_3DH_siSAM68-2_9.tif	69	10	25	46894	1760.36	176.036	0.14486	1	0.09804
MAX_HU112_3DH_CTRL_10.tif	106	10	63	133902	5172.66	517.266	0.0493	6	0.24706													MAX_HU112_3DH_siSAM68-2_10.tif	80	13	13	56203	2463.3	189.485	0.10352	2	0.05098
MAX_HU112_3DH_CTRL_11.tif	100	12	70	143087	5477.47	456.456	0.04655	6	0.27451													MAX_HU112_3DH_siSAM68-2_11.tif	80	11	22	63013	2655.47	241.406	0.09603	3	0.08627
MAX_HU112_3DH_CTRL_12.tif	96	10	64	110263	4283.07	428.307	0.05954	5	0.25098													MAX_HU112_3DH_siSAM68-2_12.tif	108	14	46	85303	3196.32	228.308	0.07978	2	0.18039
Experiment 4 (ID: HU113)	n(beads)	n(sprouts)	n(cells)	Total sprout area (µm²)	Total network length (µm)	Average sprout length (µm)	Average sprout width (µm)	Average junctions per sprout	Cell density (1/µm²)		Label	n(beads)	n(sprouts)	n(cells)	Total sprout area (µm²)	Total network length (µm)	Average sprout length (µm)	Average sprout width (µm)	Average junctions per sprout	Cell density (1/µm²)		Label	n(beads)	n(sprouts)	n(cells)	Total sprout area (µm²)	Total network length (µm)	Average sprout length (µm)	Average sprout width (µm)	Average junctions per sprout	Cell density (1/µm²)
Label
MAX_HU113_3DH_CTRL_1.tif	116	16	71	123093	5709.93	356.87	0.04466	5	0.27843		MAX_HU113_3DH_siSAM68-1_1.tif	71	12	55	69668	3391.59	282.632	0.07519	4	0.21569		MAX_HU113_3DH_siSAM68-2_.tif	64	12	46	61339	2864.55	238.712	0.08902	3	0.18039
MAX_HU113_3DH_CTRL_2.tif	111	13	102	167540	4443.21	341.785	0.05739	5	0.4		MAX_HU113_3DH_siSAM68-1_2-1.tif	81	13	68	85139	4046.35	311.258	0.06302	5	0.26667		MAX_HU113_3DH_siSAM68-2_2.tif	85	14	46	55135	2526.16	180.44	0.10094	2	0.18039
MAX_HU113_3DH_CTRL_3.tif	103	11	111	157934	5138.04	467.095	0.04963	7	0.43529		MAX_HU113_3DH_siSAM68-1_3.tif	78	9	61	71477	2964.83	329.426	0.08601	4	0.23922		MAX_HU113_3DH_siSAM68-2_3.tif	84	13	46	60892	2781.93	213.995	0.09166	3	0.18039
MAX_HU113_3DH_CTRL_4.tif	100	13	88	102184	5215.28	401.175	0.04176	6	0.3451		MAX_HU113_3DH_siSAM68-1_4.tif	67	11	63	60809	3111.71	282.883	0.08195	4	0.24706		MAX_HU113_3DH_siSAM68-2_5.tif	112	12	79	35157	3902.9	325.241	0.06534	4	0.3098
MAX_HU113_3DH_CTRL_5.tif	116	13	101	119907	8088.54	622.195	0.03153	10	0.39608		MAX_HU113_3DH_siSAM68-1_5.tif	60	19	26	28661	1436.21	75.5899	0.17755	0	0.10196		MAX_HU113_3DH_siSAM68-2_6.tif	56	9	39	94421	2039.74	226.638	0.12502	2	0.15294
MAX_HU113_3DH_CTRL_6.tif	97	14	90	101992	6293.76	449.554	0.04052	7	0.38039		MAX_HU113_3DH_siSAM68-1_6.tif	91	15	68	76452	3351.07	223.405	0.0761	2	0.26667		MAX_HU113_3DH_siSAM68-2_7.tif	69	17	36	46532	1833.88	107.875	0.13905	1	0.14118
MAX_HU113_3DH_CTRL_7.tif	86	13	79	145283	6260.92	481.609	0.04073	9	0.3098		MAX_HU113_3DH_siSAM68-1_7.tif	83	12	77	80530	3513.94	292.829	0.07257	4	0.30196		MAX_HU113_3DH_siSAM68-2_8.tif	90	13	50	91008	3648.81	280.678	0.06989	3	0.19608
MAX_HU113_3DH_CTRL_8.tif	113	11	123	126415	5010.91	455.537	0.05089	4	0.48235		MAX_HU113_3DH_siSAM68-1_8.tif	102	11	63	84407	3418.78	310.799	0.07459	4	0.24706		MAX_HU113_3DH_siSAM68-2_9.tif	97	11	36	50664	2265.26	205.933	0.11257	2	0.14118
MAX_HU113_3DH_CTRL_9-1.tif	96	15	75	113821	6413.21	427.547	0.03976	5	0.29412		MAX_HU113_3DH_siSAM68-1_9.tif	77	14	57	57095	2746.3	196.164	0.09285	2	0.22353		MAX_HU113_3DH_siSAM68-2_10.tif	90	12	26	129424	4844.92	403.744	0.05263	5	0.10196
MAX_HU113_3DH_CTRL_10.tif	143	10	123	129110	6552.93	655.293	0.03891	9	0.56078		MAX_HU113_3DH_siSAM68-1_10.tif	81	11	62	89917	4022.27	365.66	0.0634	5	0.24314		MAX_HU113_3DH_siSAM68-2_11.tif	114	10	67	116064	3458.08	345.808	0.07374	3	0.26275
MAX_HU113_3DH_CTRL_11.tif	139	13	123	111795	7684.75	591.134	0.03318	9	0.5451		MAX_HU113_3DH_siSAM68-1_11.tif	75	13	55	61795	2572.22	197.863	0.09914	2	0.21569		MAX_HU113_3DH_siSAM68-2_12.tif	99	12	37	98317	3847.84	320.654	0.06627	4	0.1451
